# Supplementary material for: Inhibitors of the Transcription Factor STAT3 Decrease Growth and Induce Immune Response Genes in Models of Malignant Pleural Mesothelioma (MPM)
Source: Cancers (Basel). 2020 Dec 22;13(1):7. doi: 10.3390/cancers13010007 (PMC7792575; doi:10.3390/cancers13010007)
Supplement: Supplementary file 1 [file cancers-13-00007-s001.zip › cancers-1009062-supplementary.xlsx]

## Sheet: Table S1 (patient information)
Patient specimen	Sex	Age (years)	Pathology	TNM stage	Neoadjuvant therapy	Type of surgery	Surgical side
MS1	Male	76	Epithelioid	T3N1M0	-	P/D	Right
MS2	Male	76	Sarcomatoid	T3N0M0	-	EPP	Left
MS3	Male	70	Biphasic	T3N0M0	-	P/D	Right
MS4	Male	73	Biphasic (predominantly sarcomatoid)	T3N0M0	Cisplatin, bevacizumab, pemetrexed	P/D	Right
MS5	Male	70	Epithelioid	T1N0M0	-	P/D	Left
MS6	Male	74	Biphasic (predominantly epithelioid)	T2N0M0	-	P/D	Left
MS7	Female	68	Epithelioid	T2N0M0	-	P/D	Right
MS8	Male	73	Epithelioid	T2N0M0	Cisplatin, pemetrexed	P/D	Left

## Sheet: Table S3 Tumor(MS4)-atovaquone
ID	AQ-810	AQ-800	AQ-797	AQ-795	DMSO-823	DMSO-807	DMSO-806	DMSO-783	Gene.name
ENSG00000000003	564.162	290.541	332.693	475.066	332.56	364.748	491.839	535.435	TSPAN6
ENSG00000000419	945.092	724.047	807.379	886.054	897.065	795.189	914.347	993.723	DPM1
ENSG00000000457	61.4792	55.3411	39.626	66.2883	43.4235	67.6548	44.0453	49.5943	SCYL3
ENSG00000000460	33.7533	28.8235	55.3112	45.297	45.5417	36.2787	37.5201	55.1048	C1orf112
ENSG00000000971	43.3971	66.8705	39.626	67.3932	68.8421	50.0057	41.5983	34.8997	CFH
ENSG00000001036	2049.31	2141.01	2217.4	2065.99	1824.84	1757.06	1647.62	1935.1	FUCA2
ENSG00000001084	72.3284	74.9411	94.1117	88.3845	103.793	110.797	135.398	138.68	GCLC
ENSG00000001167	213.369	186.776	293.893	317.079	231.945	329.449	248.774	267.258	NFYA
ENSG00000001460	169.972	222.517	214.641	155.778	209.704	177.471	203.913	150.62	STPG1
ENSG00000001461	964.379	1502.28	1313.44	962.286	1103.59	938.342	974.706	815.551	NIPAL3
ENSG00000001497	1272.98	1357.01	1363.79	1129.11	1273.05	1077.57	1292.81	1385.89	LAS1L
ENSG00000001561	8.43832	53.0353	1.65108	11.0481	47.6599	31.3761	8.15653	9.18413	ENPP4
ENSG00000001617	1951.66	2530.7	1752.62	1777.63	2645.65	1830.6	1338.49	1596.2	SEMA3F
ENSG00000001629	980.05	1360.47	1281.24	989.906	1181.97	1636.46	1082.37	1092.91	ANKIB1
ENSG00000001630	132.602	96.847	283.161	209.913	131.329	284.346	136.214	204.806	CYP51A1
ENSG00000001631	297.752	276.706	406.166	340.28	367.511	445.149	312.395	312.261	KRIT1
ENSG00000002016	67.5065	63.4117	60.2645	65.1835	47.6599	81.3818	79.934	81.7388	RAD52
ENSG00000002079	66.3011	114.141	151.9	72.9172	108.029	104.914	72.5932	69.7994	MYH16
ENSG00000002330	1494.79	1750.16	1544.59	1450.61	1592.9	1408.98	1287.92	1192.1	BAD
ENSG00000002549	507.504	621.435	640.62	701.552	554.973	690.275	615.003	573.09	LAP3
ENSG00000002586	10384	11975.6	9482.99	10166.4	10720.3	7854.82	8780.51	8453.99	CD99
ENSG00000002822	626.846	651.411	596.041	541.355	653.47	425.539	580.745	514.311	MAD1L1
ENSG00000002834	9487.08	10174.7	11603	10885.7	10459.8	11400.3	10626.3	11551.8	LASP1
ENSG00000002919	364.053	465.788	408.643	336.966	421.525	430.441	402.117	349.915	SNX11
ENSG00000003056	778.736	856.635	1091.37	1114.75	721.253	1324.66	886.615	1149.85	M6PR
ENSG00000003137	12.0547	31.1294	18.9874	23.2009	14.8275	13.7271	20.3913	21.1235	CYP26B1
ENSG00000003147	33.7533	35.7412	23.1151	32.0394	64.6056	39.2202	41.5983	42.247	ICA1
ENSG00000003249	418.299	510.753	371.493	456.285	364.333	455.934	269.166	289.3	DBNDD1
ENSG00000003393	235.067	260.565	261.696	248.581	230.886	379.455	252.853	301.24	ALS2
ENSG00000003400	48.219	40.3529	37.1493	47.5066	37.0688	37.2592	49.7549	33.9813	CASP10
ENSG00000003402	1133.15	1457.32	1288.67	1008.69	1299.53	1259.95	1105.21	1031.38	CFLAR
ENSG00000003436	808.873	2037.25	751.242	2104.66	1887.33	1679.6	379.279	409.612	TFPI
ENSG00000003509	86.7941	74.9411	75.9498	68.498	88.9651	89.2259	97.8784	99.1886	NDUFAF7
ENSG00000003756	818.517	759.788	711.616	763.421	728.667	855	809.944	773.304	RBM5
ENSG00000003987	26.5204	27.6706	32.1961	22.0961	54.0145	33.3371	51.3862	34.8997	MTMR7
ENSG00000003989	10.8493	17.2941	7.42987	44.1922	58.251	50.0057	21.207	25.7156	SLC7A2
ENSG00000004059	3356.04	4459.57	3998.1	2890.17	3209.1	2973.87	3419.22	2769.02	ARF5
ENSG00000004139	286.903	127.976	246.011	186.712	182.167	267.678	286.294	284.708	SARM1
ENSG00000004142	2932.92	3179.81	3208.05	2683.57	3152.97	2995.44	2914.33	2785.55	POLDIP2
ENSG00000004399	5355.92	7491.81	6104.05	5013.61	5130.32	5610.44	5687.55	4883.2	PLXND1
ENSG00000004455	1291.06	1021.51	1207.77	1125.8	1295.29	1296.23	1107.66	1316.09	AK2
ENSG00000004468	7.23284	36.8941	14.0342	20.9913	68.8421	32.3566	19.5757	3.67365	CD38
ENSG00000004478	2037.25	1351.25	1854.99	1713.55	1381.08	1956.11	1786.28	2087.55	FKBP4
ENSG00000004487	1074.08	1012.28	1119.43	1005.37	1055.93	1080.52	1195.75	1215.06	KDM1A
ENSG00000004534	703.997	665.247	644.748	550.193	603.692	491.233	567.695	641.053	RBM6
ENSG00000004660	143.451	93.3882	112.274	74.022	72.0194	77.4598	99.5097	109.291	CAMKK1
ENSG00000004700	578.627	541.882	657.131	701.552	451.18	1069.73	663.942	793.509	RECQL
ENSG00000004766	197.698	245.576	307.101	193.341	221.354	315.722	265.087	281.953	VPS50
ENSG00000004777	122.958	144.118	170.887	161.302	114.384	123.544	119.901	153.375	ARHGAP33
ENSG00000004779	1193.42	996.141	990.649	922.513	1067.58	918.732	1039.96	947.803	NDUFAB1
ENSG00000004799	13.2602	5.7647	3.30216	8.83845	15.8866	11.766	10.6035	15.613	PDK4
ENSG00000004838	96.4379	44.9647	85.0307	45.297	34.9506	58.8302	88.0906	80.8204	ZMYND10
ENSG00000004864	366.464	546.494	624.935	413.197	389.752	589.283	402.117	457.37	SLC25A13
ENSG00000004866	190.465	240.965	297.195	253.001	244.654	278.463	227.567	241.543	ST7
ENSG00000004897	1276.6	1019.2	1266.38	1146.79	1112.06	1506.05	1354.8	1569.57	CDC27
ENSG00000004961	548.491	592.611	596.866	560.137	567.682	603.01	601.952	609.826	HCCS
ENSG00000004975	1479.12	1271.69	1366.27	1476.02	1173.49	1374.67	1343.38	1341.8	DVL2
ENSG00000005007	1621.36	2069.53	2237.22	2091.4	2083.27	2074.75	1667.2	1886.42	UPF1
ENSG00000005020	163.944	168.329	165.934	118.214	124.975	173.549	175.365	146.028	SKAP2
ENSG00000005022	6012.9	5320.82	6191.56	5722.89	5206.58	6316.41	6226.7	6234.19	SLC25A5
ENSG00000005059	297.752	295.153	314.531	336.966	314.555	327.488	283.847	331.547	MCUB
ENSG00000005073	21.6985	24.2117	18.1619	14.3625	13.7684	17.6491	12.2348	11.9394	HOXA11
ENSG00000005075	1435.72	1943.86	1720.43	1236.28	1950.88	1485.46	1407	1311.49	POLR2J
ENSG00000005100	544.874	463.482	537.427	509.315	534.85	553.985	472.263	580.437	DHX33
ENSG00000005156	284.492	298.612	395.434	352.433	312.437	350.04	334.418	393.999	LIG3
ENSG00000005175	446.025	336.659	440.013	365.691	353.742	534.375	513.046	617.174	RPAP3
ENSG00000005189	220.602	194.847	250.964	177.874	186.403	199.042	174.55	214.909	REXO5
ENSG00000005194	683.504	757.482	734.731	681.665	776.327	669.684	667.204	632.787	CIAPIN1
ENSG00000005206	482.19	649.105	566.321	640.787	707.485	503.979	476.342	459.207	SPPL2B
ENSG00000005238	976.434	1084.92	934.512	712.6	863.174	729.495	805.05	774.222	FAM214B
ENSG00000005243	534.025	887.764	837.099	459.599	593.101	414.753	654.154	428.899	COPZ2
ENSG00000005249	48.219	19.6	41.277	27.6201	49.7781	66.6743	66.8836	92.7597	PRKAR2B
ENSG00000005302	374.902	276.706	320.31	267.363	274.309	304.937	300.16	376.549	MSL3
ENSG00000005339	860.708	956.941	1044.31	1051.78	1004.04	1264.85	1004.88	955.15	CREBBP
ENSG00000005379	81.9722	91.0823	55.3112	70.7076	50.8372	74.5183	92.9845	79.902	TSPOAP1
ENSG00000005436	166.355	164.87	174.189	166.826	201.231	170.608	174.55	201.133	GCFC2
ENSG00000005448	447.231	277.859	279.033	319.289	282.782	225.516	319.736	322.363	WDR54
ENSG00000005469	312.218	236.353	383.051	239.743	245.713	218.652	336.865	243.38	CROT
ENSG00000005483	1564.71	1563.39	1433.96	1272.74	1267.75	1095.22	1171.28	1104.85	KMT2E
ENSG00000005486	1142.79	1166.78	1031.1	1111.43	1277.29	795.189	1110.92	1027.7	RHBDD2
ENSG00000005700	382.135	390.847	369.842	490.534	310.319	467.7	424.955	489.514	IBTK
ENSG00000005801	106.082	93.3882	97.4138	101.642	111.206	92.1674	102.772	101.025	ZNF195
ENSG00000005810	372.491	421.976	376.447	436.398	446.944	434.363	380.91	346.242	MYCBP2
ENSG00000005812	485.806	488.847	484.593	574.499	486.131	774.598	614.187	631.868	FBXL3
ENSG00000005882	119.342	172.941	174.189	131.472	131.329	122.563	159.868	115.72	PDK2
ENSG00000005884	17489	21358.2	20184.5	15863.9	19083	19453.2	15683.4	17519.7	ITGA3
ENSG00000005889	337.533	303.223	340.123	341.385	355.861	440.246	343.39	401.347	ZFX
ENSG00000005893	3941.9	3230.54	4325.01	3981.72	3233.46	4136.75	4225.08	5158.73	LAMP2
ENSG00000006007	1110.24	1057.25	960.104	1050.67	1105.71	1214.84	960.84	951.476	GDE1
ENSG00000006015	775.12	783.999	806.554	699.342	838.814	533.394	644.366	551.966	REX1BD
ENSG00000006016	7.23284	11.5294	10.732	15.4673	22.2413	10.7855	15.4974	13.7762	CRLF1
ENSG00000006025	182.027	213.294	205.56	246.372	168.398	167.666	163.131	177.254	OSBPL7
ENSG00000006042	1.20547	97.9999	37.9749	156.882	227.708	150.017	2.44696	1.83683	TMEM98
ENSG00000006062	719.668	838.188	738.034	594.386	585.687	722.632	700.646	725.547	MAP3K14
ENSG00000006118	2957.03	2753.22	2517.9	2597.4	2686.96	1645.29	2867.84	3061.07	TMEM132A
ENSG00000006125	5351.1	5283.93	5485.72	5383.72	4832.71	5196.67	4947.75	5534.36	AP2B1
ENSG00000006194	501.477	513.058	490.371	545.774	509.431	470.642	502.442	432.573	ZNF263
ENSG00000006282	2026.4	2581.43	2096.05	2159.9	2301.44	2043.37	2093.78	1821.21	SPATA20
ENSG00000006327	7270.21	7502.18	8050.68	6623.31	8740.82	6876.28	8119.01	7887.33	TNFRSF12A
ENSG00000006432	106.082	184.47	163.457	154.673	187.462	204.925	132.952	139.599	MAP3K9
ENSG00000006451	1292.27	1619.88	1494.23	1245.12	1140.66	1317.8	1507.33	1254.55	RALA
ENSG00000006453	819.722	1750.16	1310.96	949.028	1618.32	1628.62	660.679	559.314	BAIAP2L1
ENSG00000006459	84.3832	88.7764	97.4138	92.8037	86.8469	126.485	104.404	98.2702	KDM7A
ENSG00000006468	39.7806	39.2	21.4641	36.4586	101.674	54.9082	44.0453	46.8391	ETV1
ENSG00000006530	399.012	365.482	551.461	383.368	438.471	468.681	471.448	483.085	AGK
ENSG00000006534	1821.47	2423.48	2266.11	1925.68	2270.73	2139.46	1825.43	1764.27	ALDH3B1
ENSG00000006576	653.367	684.847	755.37	701.552	692.657	761.852	687.596	798.101	PHTF2
ENSG00000006606	48.219	72.6352	46.2303	60.7643	75.1967	38.2397	50.5705	32.1445	CCL26
ENSG00000006607	177.205	223.67	220.419	197.76	212.881	243.165	252.853	208.48	FARP2
ENSG00000006625	335.122	305.529	340.123	291.669	370.688	284.346	345.837	431.654	GGCT
ENSG00000006634	291.725	176.4	371.493	273.992	264.777	359.845	269.981	293.892	DBF4
ENSG00000006638	59.0682	104.918	80.903	97.2229	81.5514	44.1227	53.0175	44.0838	TBXA2R
ENSG00000006652	466.518	539.576	525.87	552.403	586.746	603.01	530.99	544.619	IFRD1
ENSG00000006695	247.122	269.788	258.394	259.629	251.009	256.892	265.087	289.3	COX10
ENSG00000006704	656.983	536.117	608.424	551.298	649.234	749.105	721.853	568.498	GTF2IRD1
ENSG00000006712	1570.73	1780.14	1584.21	1682.62	1810.02	1294.27	1561.16	1400.58	PAF1
ENSG00000006715	839.01	842.799	798.298	787.727	670.416	932.459	777.318	891.779	VPS41
ENSG00000006740	25.315	43.8117	42.9281	45.297	58.251	42.1617	61.174	55.1048	ARHGAP44
ENSG00000006744	2020.37	2183.67	2098.53	1694.77	2118.22	1889.43	1937.99	2042.55	ELAC2
ENSG00000006756	1125.91	1205.98	1001.38	1021.95	1109.95	991.29	1093.79	1009.34	ARSD
ENSG00000006757	382.135	289.388	272.429	325.918	321.969	347.098	389.882	324.2	PNPLA4
ENSG00000006831	1062.02	1137.95	1358.01	1458.34	1484.87	1666.86	1202.27	1486.91	ADIPOR2
ENSG00000006837	27.7259	20.7529	23.9407	9.94325	18.0048	17.6491	16.3131	22.0419	CDKL3
ENSG00000007047	560.545	745.952	765.277	715.914	829.282	834.409	623.159	607.071	MARK4
ENSG00000007080	2427.82	2949.22	2909.21	2571.99	2601.17	2006.11	2198.19	2128.88	CCDC124
ENSG00000007168	2378.4	2956.14	2887.74	2737.71	2616	3174.87	2595.41	2789.22	PAFAH1B1
ENSG00000007202	3262.01	4000.7	4114.5	3655.8	3822.32	4026.93	3393.93	3617.63	KIAA0100
ENSG00000007237	33.7533	29.9765	18.9874	26.5153	33.8915	14.7076	22.0226	20.2051	GAS7
ENSG00000007255	183.232	235.2	158.504	157.987	163.103	120.602	156.605	108.373	TRAPPC6A
ENSG00000007341	71.123	50.7294	75.1242	77.3364	93.2016	71.5768	86.4593	78.0651	ST7L
ENSG00000007372	254.355	342.423	283.161	334.756	312.437	265.717	288.741	245.216	PAX6
ENSG00000007376	810.078	871.623	813.983	686.084	724.43	692.236	659.048	607.071	RPUSD1
ENSG00000007384	779.942	1036.49	884.98	800.984	904.479	660.86	799.34	678.707	RHBDF1
ENSG00000007392	658.189	458.87	490.371	513.735	568.741	501.038	638.657	519.822	LUC7L
ENSG00000007520	1968.54	1979.6	2020.92	1743.38	1608.79	1533.51	1620.7	1422.62	TSR3
ENSG00000007541	1029.47	1511.5	1078.16	892.683	1309.06	802.052	856.436	807.285	PIGQ
ENSG00000007545	122.958	178.706	167.585	185.607	172.635	200.023	159.052	154.293	CRAMP1
ENSG00000007866	337.533	446.188	432.583	382.263	462.831	419.656	411.905	347.16	TEAD3
ENSG00000007923	248.328	240.965	358.285	297.193	281.723	371.611	248.774	334.302	DNAJC11
ENSG00000007933	10.8493	8.07058	6.60433	29.8298	7.41376	3.92202	18.76	8.26572	FMO3
ENSG00000007944	45.808	63.4117	56.1368	75.1268	87.906	59.8107	70.9618	61.5337	MYLIP
ENSG00000007952	10.8493	9.22352	11.5576	7.73364	13.7684	6.86353	17.9444	15.613	NOX1
ENSG00000007968	25.315	19.6	33.0216	24.3057	30.7142	14.7076	18.76	25.7156	E2F2
ENSG00000008018	3512.75	3250.14	3149.44	3066.94	3449.52	2462.05	3136.19	3137.3	PSMB1
ENSG00000008056	188.054	329.741	203.083	209.913	233.004	161.783	189.232	133.17	SYN1
ENSG00000008083	194.081	175.247	218.768	225.38	203.349	219.633	217.779	232.359	JARID2
ENSG00000008086	84.3832	56.4941	63.5667	93.9085	46.6008	104.914	80.7497	88.1677	CDKL5
ENSG00000008128	125.369	95.6941	109.797	87.2797	106.97	98.0504	119.901	102.862	CDK11A
ENSG00000008130	460.491	577.623	642.271	513.735	577.214	725.573	517.124	570.335	NADK
ENSG00000008256	912.544	1429.65	1236.66	1247.33	1355.66	1953.16	1053.01	1058.01	CYTH3
ENSG00000008277	24.1095	9.22352	23.9407	20.9913	29.655	14.7076	32.6261	26.634	ADAM22
ENSG00000008282	1489.97	1905.81	1864.07	1589.82	1507.11	1720.78	1562.79	1841.42	SYPL1
ENSG00000008283	847.448	914.282	947.721	778.888	950.021	663.801	739.798	719.118	CYB561
ENSG00000008294	2055.33	2259.76	2263.63	2395.22	2017.6	2816.01	2082.36	2491.66	SPAG9
ENSG00000008300	989.694	1105.67	1258.12	1123.59	1024.16	1129.54	1053.01	1190.26	CELSR3
ENSG00000008311	44.6025	44.9647	62.7411	93.9085	44.4826	130.407	50.5705	98.2702	AASS
ENSG00000008324	274.848	205.223	234.454	151.358	274.309	212.769	281.4	263.585	SS18L2
ENSG00000008382	247.122	257.106	237.756	249.686	246.772	179.432	218.595	185.519	MPND
ENSG00000008405	97.6434	187.929	116.401	125.948	115.443	153.939	113.376	173.58	CRY1
ENSG00000008441	2793.08	4811.22	4609	4316.48	4393.18	3949.47	3311.55	3219.04	NFIX
ENSG00000008513	225.424	327.435	207.211	298.298	325.146	271.6	202.282	195.622	ST3GAL1
ENSG00000008517	963.174	1531.1	1109.53	1216.39	1331.3	902.064	722.669	677.789	IL32
ENSG00000008710	748.599	940.799	772.706	720.333	869.528	721.651	732.457	724.628	PKD1
ENSG00000008735	38.5752	110.682	60.2645	67.3932	25.4186	55.8887	35.0731	22.9603	MAPK8IP2
ENSG00000008838	1160.87	1282.07	1315.09	1192.09	1117.36	964.816	1178.62	1168.22	MED24
ENSG00000008853	646.134	677.929	610.075	652.94	919.306	817.74	690.043	696.157	RHOBTB2
ENSG00000008869	159.123	140.659	152.725	203.284	141.921	212.769	196.572	221.338	HEATR5B
ENSG00000008952	2421.8	2568.75	2086.97	2381.96	2854.3	1718.82	2371.1	2411.75	SEC62
ENSG00000008988	37384.2	31859.2	30263.5	32038.3	33089.7	24964.6	31979.3	28907.1	RPS20
ENSG00000009307	5237.78	5218.21	5188.53	5651.08	5059.36	5993.82	5311.53	5493.95	CSDE1
ENSG00000009335	1191.01	1656.78	1745.19	1158.94	1401.2	2393.41	1300.15	1393.23	UBE3C
ENSG00000009413	289.314	272.094	261.696	328.127	305.023	348.079	292.004	314.097	REV3L
ENSG00000009694	21.6985	3.45882	10.732	8.83845	16.9457	6.86353	17.1287	22.9603	TENM1
ENSG00000009780	103.671	97.9999	99.8905	97.2229	83.6696	88.2454	98.6941	90.0045	FAM76A
ENSG00000009830	338.738	454.259	440.013	414.302	416.23	444.168	374.385	516.148	POMT2
ENSG00000009844	861.914	805.905	856.086	827.5	916.129	988.348	889.062	1042.4	VTA1
ENSG00000009954	1827.5	1702.89	1830.22	1621.85	1876.74	2111.03	1923.31	2004.9	BAZ1B
ENSG00000010017	898.078	925.811	941.942	945.714	1030.51	1176.6	1106.84	1147.1	RANBP9
ENSG00000010030	19.2876	38.047	18.1619	8.83845	24.3595	17.6491	30.1792	13.7762	ETV7
ENSG00000010072	191.67	208.682	194.828	198.865	195.935	216.691	251.221	288.382	SPRTN
ENSG00000010165	392.984	439.27	465.605	414.302	295.491	327.488	342.574	428.899	METTL13
ENSG00000010219	562.956	387.388	441.664	487.219	479.776	407.89	600.321	444.512	DYRK4
ENSG00000010244	2255.44	2240.16	2145.58	2167.63	2245.31	2247.32	2168.82	2172.05	ZNF207
ENSG00000010256	5030.44	5078.7	4423.25	4323.11	4305.28	3748.47	4605.99	4109.9	UQCRC1
ENSG00000010270	531.614	371.247	494.499	498.267	441.648	511.823	586.455	646.563	STARD3NL
ENSG00000010278	1567.12	2203.27	1381.13	1446.19	1982.65	1832.56	1447.78	1362.93	CD9
ENSG00000010292	1434.51	1179.46	1718.78	1431.83	1384.26	1817.85	1477.96	1939.69	NCAPD2
ENSG00000010295	438.792	341.27	351.68	380.053	347.388	324.547	410.274	295.729	IFFO1
ENSG00000010318	81.9722	115.294	93.2861	77.3364	81.5514	98.0504	105.219	109.291	PHF7
ENSG00000010322	755.832	860.094	785.915	740.22	636.524	656.938	579.93	606.153	NISCH
ENSG00000010327	19.2876	24.2117	12.3831	7.73364	23.3004	9.80504	12.2348	8.26572	STAB1
ENSG00000010361	278.464	198.306	269.952	264.049	230.886	183.354	243.065	252.564	FUZ
ENSG00000010404	1083.72	1202.52	1052.56	1014.21	1044.28	1249.16	1419.24	1096.59	IDS
ENSG00000010539	104.876	121.059	139.516	97.2229	128.152	145.115	139.477	110.21	ZNF200
ENSG00000010626	108.493	84.1646	83.3796	89.4893	78.374	69.6158	92.1688	79.902	LRRC23
ENSG00000010704	368.875	379.317	402.864	376.739	370.688	323.566	362.966	382.06	HFE
ENSG00000010803	278.464	333.2	287.288	335.861	406.698	479.467	365.413	343.487	SCMH1
ENSG00000010810	571.395	571.858	663.735	639.683	659.825	657.918	639.472	649.318	FYN
ENSG00000010818	443.614	577.623	533.299	763.421	699.012	788.325	499.996	553.803	HIVEP2
ENSG00000011007	482.19	440.423	448.269	428.665	507.313	570.653	513.046	516.148	ELOA
ENSG00000011009	943.886	1054.94	918.002	799.879	1028.39	745.183	858.883	767.794	LYPLA2
ENSG00000011021	167.561	151.035	188.223	223.171	187.462	228.457	171.287	213.99	CLCN6
ENSG00000011028	4281.84	5505.29	3653.02	4137.5	5636.58	3518.05	4581.53	3808.66	MRC2
ENSG00000011052	44.6025	39.2	20.6385	30.9346	37.0688	34.3176	33.4418	38.5734	NME1-NME2
ENSG00000011105	1511.66	2322.02	2264.46	2269.27	1575.95	1726.67	1459.2	1429.97	TSPAN9
ENSG00000011114	437.587	496.917	454.873	595.49	470.244	691.255	506.521	525.332	BTBD7
ENSG00000011132	163.944	190.235	203.909	234.219	245.713	246.107	192.494	188.275	APBA3
ENSG00000011143	239.889	206.376	198.955	186.712	192.758	159.822	216.964	201.133	MKS1
ENSG00000011198	200.109	146.423	220.419	257.42	165.221	308.859	230.83	235.114	ABHD5
ENSG00000011201	32.5478	11.5294	21.4641	49.7163	25.4186	24.5126	89.7219	61.5337	ANOS1
ENSG00000011243	614.792	725.2	682.722	679.456	586.746	577.517	625.606	623.603	AKAP8L
ENSG00000011258	239.889	192.541	182.445	222.066	229.827	230.418	269.981	283.79	MBTD1
ENSG00000011260	904.105	913.129	875.899	820.871	787.977	843.234	813.206	970.763	UTP18
ENSG00000011275	967.996	1000.75	987.347	1042.94	1157.61	988.348	1077.48	997.397	RNF216
ENSG00000011295	708.819	786.305	596.866	681.665	790.095	735.378	623.159	703.505	TTC19
ENSG00000011304	3896.09	4450.35	5557.54	5084.32	5789.09	6013.43	4969.78	5529.77	PTBP1
ENSG00000011332	50.6299	72.6352	89.1584	72.9172	76.2558	60.7913	66.0679	53.268	DPF1
ENSG00000011347	27.7259	17.2941	38.8004	15.4673	14.8275	19.6101	37.5201	17.4499	SYT7
ENSG00000011376	276.054	229.435	340.948	269.573	225.59	326.508	292.82	358.181	LARS2
ENSG00000011405	415.888	493.458	520.916	572.289	542.264	783.423	427.402	501.454	PIK3C2A
ENSG00000011422	1197.04	1419.27	1226.75	1413.05	1537.83	1041.3	1039.14	1158.12	PLAUR
ENSG00000011426	2489.3	2218.26	3179.16	2879.12	2810.87	3868.09	2636.19	4868.51	ANLN
ENSG00000011451	778.736	1226.73	1344.81	1101.49	1199.97	1064.83	900.481	889.024	WIZ
ENSG00000011454	397.806	476.164	388.004	500.477	474.481	561.829	389.067	427.062	RABGAP1
ENSG00000011465	2.41095	27.6706	4.95325	11.0481	10.5911	1.96101	15.4974	9.18413	DCN
ENSG00000011478	267.615	261.717	291.416	292.774	294.432	220.613	273.244	239.706	QPCTL
ENSG00000011485	1148.82	1088.38	1330.77	1109.23	1352.48	1301.13	1230.01	1182.92	PPP5C
ENSG00000011523	124.164	115.294	136.214	135.891	112.266	154.92	129.689	103.781	CEP68
ENSG00000011566	166.355	192.541	200.606	214.332	181.108	246.107	211.254	206.643	MAP4K3
ENSG00000011638	172.383	266.329	190.7	241.952	221.354	201.003	183.522	123.986	TMEM159
ENSG00000012048	502.683	417.364	617.505	450.761	448.003	625.562	430.665	701.668	BRCA1
ENSG00000012061	1304.32	1306.28	1279.59	1195.4	1154.43	1117.77	1026.09	929.434	ERCC1
ENSG00000012171	1854.02	1495.36	2086.14	1104.81	1094.06	1268.77	1720.21	1503.44	SEMA3B
ENSG00000012174	407.45	382.776	378.923	434.189	351.624	436.324	353.178	478.493	MBTPS2
ENSG00000012211	61.4792	69.1764	82.5541	125.948	82.6105	74.5183	66.8836	68.881	PRICKLE3
ENSG00000012232	667.833	892.376	942.768	744.639	929.897	765.774	794.446	782.488	EXTL3
ENSG00000012660	2287.99	1868.92	2358.57	2316.78	2263.32	3014.07	2305.85	2944.43	ELOVL5
ENSG00000012779	13.2602	59.9529	17.3364	26.5153	50.8372	43.1422	13.8661	19.2867	ALOX5
ENSG00000012822	1070.46	1313.2	1254	1142.37	1137.48	953.05	1154.97	988.213	CALCOCO1
ENSG00000012963	593.093	507.294	649.701	745.744	546.5	791.267	689.227	725.547	UBR7
ENSG00000012983	717.257	682.541	643.096	813.137	652.411	962.855	855.62	935.863	MAP4K5
ENSG00000013016	37.3697	17.2941	39.626	25.4105	32.8324	23.5321	33.4418	29.3892	EHD3
ENSG00000013275	1816.65	2032.63	2254.55	2029.53	2409.47	1780.6	1991.83	1927.75	PSMC4
ENSG00000013288	1092.16	1415.81	1379.48	1256.16	1022.04	1290.34	1019.57	973.518	MAN2B2
ENSG00000013297	98.8489	55.3411	73.4731	96.1181	56.1328	66.6743	61.9897	70.7178	CLDN11
ENSG00000013306	2351.88	2701.34	2626.87	2376.44	2725.09	2222.8	2043.21	2004.9	SLC25A39
ENSG00000013364	9305.05	10400.7	10132.7	8674.94	8491.93	6281.11	8311.51	7297.71	MVP
ENSG00000013374	813.695	1170.23	1026.97	892.683	875.883	1052.08	852.358	759.528	NUB1
ENSG00000013375	591.888	513.058	551.461	610.958	571.919	633.406	592.164	731.057	PGM3
ENSG00000013392	196.492	149.882	165.934	131.472	130.27	140.212	157.421	134.088	RWDD2A
ENSG00000013441	458.08	392	322.787	486.115	560.269	327.488	675.361	685.136	CLK1
ENSG00000013503	148.273	166.023	203.083	162.406	177.93	164.725	163.131	180.927	POLR3B
ENSG00000013523	212.163	208.682	219.594	229.8	198.053	234.34	239.802	224.093	ANGEL1
ENSG00000013561	793.202	807.058	847.831	886.054	801.745	809.896	862.961	855.961	RNF14
ENSG00000013563	829.366	845.105	700.059	795.46	761.499	770.676	765.083	695.239	DNASE1L1
ENSG00000013573	162.739	106.071	168.41	153.568	147.216	147.076	136.214	183.683	DDX11
ENSG00000013583	826.955	747.105	648.05	718.124	512.609	599.088	704.725	623.603	HEBP1
ENSG00000013588	5942.99	6712.42	5559.19	4546.28	5430.05	4989.79	5240.57	6641.05	GPRC5A
ENSG00000013619	144.657	178.706	198.13	213.228	149.334	218.652	221.042	224.093	MAMLD1
ENSG00000013810	1056	977.693	1080.63	904.836	1017.8	922.654	972.259	1245.37	TACC3
ENSG00000014123	591.888	402.376	517.614	490.534	489.308	569.673	630.5	673.197	UFL1
ENSG00000014138	265.204	243.27	320.31	287.25	293.373	267.678	244.696	289.3	POLA2
ENSG00000014164	573.806	683.694	619.981	563.451	663.002	540.258	619.897	596.05	ZC3H3
ENSG00000014216	2564.04	3720.54	3756.21	3116.66	2904.08	3176.83	2581.54	2443.9	CAPN1
ENSG00000014641	1298.3	931.576	1105.4	1028.57	1250.81	1110.91	1365.4	1424.46	MDH1
ENSG00000014824	684.709	650.258	707.489	634.159	594.16	866.766	675.361	787.999	SLC30A9
ENSG00000014914	165.15	178.706	159.329	184.503	148.275	181.393	190.047	159.804	MTMR11
ENSG00000014919	468.929	371.247	438.362	435.293	367.511	496.135	449.425	493.188	COX15
ENSG00000015133	26.5204	23.0588	48.7069	24.3057	15.8866	41.1812	36.7044	50.5127	CCDC88C
ENSG00000015153	622.025	668.705	539.904	538.04	581.451	518.687	543.225	553.803	YAF2
ENSG00000015171	719.668	718.282	698.408	742.429	796.45	1050.12	829.519	889.943	ZMYND11
ENSG00000015475	925.804	755.176	783.438	676.141	829.282	674.587	855.62	783.407	BID
ENSG00000015479	51.8354	43.8117	49.5325	56.3451	45.5417	76.4793	49.7549	78.0651	MATR3
ENSG00000015532	1338.08	1408.89	1268.03	1143.47	1187.26	869.707	1181.88	1229.76	XYLT2
ENSG00000015676	1056	1058.4	1054.22	930.246	1025.22	1034.43	879.274	1044.24	NUDCD3
ENSG00000016391	15.6712	13.8353	33.0216	6.62883	12.7093	10.7855	35.0731	23.8787	CHDH
ENSG00000016864	1240.43	1082.61	1064.12	1066.14	1040.04	884.415	1165.57	1195.77	GLT8D1
ENSG00000017260	3479	3424.23	3686.87	3266.91	3325.6	4306.37	3394.75	3778.35	ATP2C1
ENSG00000017483	131.397	132.588	170.061	109.376	30.7142	54.9082	89.7219	75.3099	SLC38A5
ENSG00000017797	1227.17	1425.03	1274.64	1268.32	1362.01	1367.8	1264.26	1292.21	RALBP1
ENSG00000018189	141.04	101.459	105.669	118.214	119.679	132.368	132.952	131.333	RUFY3
ENSG00000018236	22.904	21.9059	24.7662	22.0961	32.8324	9.80504	27.7322	28.4708	CNTN1
ENSG00000018408	1248.87	1009.98	1219.32	1031.89	1329.18	1422.71	1371.11	1440.99	WWTR1
ENSG00000018510	606.353	526.894	648.875	622.006	612.165	761.852	636.21	697.994	AGPS
ENSG00000018610	371.286	359.717	361.587	325.918	335.737	363.767	345.021	390.326	CXorf56
ENSG00000018699	236.273	202.918	236.105	209.913	180.048	227.477	221.858	279.198	TTC27
ENSG00000019144	748.599	1034.19	741.336	978.858	963.789	775.579	912.716	772.386	PHLDB1
ENSG00000019169	26.5204	33.4353	18.9874	18.7817	14.8275	10.7855	28.5479	18.3683	MARCO
ENSG00000019485	57.8627	73.7882	81.7286	87.2797	84.7287	109.816	68.5149	53.268	PRDM11
ENSG00000019549	429.149	533.811	553.938	752.373	316.674	465.739	594.611	393.081	SNAI2
ENSG00000019582	242.3	288.235	212.99	300.507	364.333	207.867	374.385	377.468	CD74
ENSG00000019991	13743.6	11414.1	11669.8	15120.4	14090.4	17722.6	13122.2	13463.9	HGF
ENSG00000019995	149.479	175.247	193.177	185.607	155.689	319.644	185.153	220.419	ZRANB1
ENSG00000020129	613.586	524.588	693.454	616.482	604.751	511.823	670.467	694.32	NCDN
ENSG00000020181	89.2051	46.1176	51.1835	129.262	79.4332	55.8887	73.4088	89.0861	ADGRA2
ENSG00000020256	385.752	394.306	341.774	364.586	321.969	380.436	340.127	301.24	ZFP64
ENSG00000020426	337.533	284.776	260.871	312.66	274.309	332.391	337.681	358.181	MNAT1
ENSG00000020577	443.614	591.458	585.309	749.058	564.505	752.047	466.554	591.458	SAMD4A
ENSG00000020922	144.657	160.259	176.666	222.066	167.339	138.251	167.209	190.112	MRE11
ENSG00000021300	19.2876	18.447	23.1151	14.3625	27.5368	11.766	26.1009	20.2051	PLEKHB1
ENSG00000021355	1007.78	1241.72	964.232	1012	1065.46	974.621	1012.23	838.511	SERPINB1
ENSG00000021574	159.123	169.482	175.84	178.979	184.285	225.516	181.891	202.051	SPAST
ENSG00000021645	370.08	712.517	358.285	513.735	235.122	265.717	540.778	550.13	NRXN3
ENSG00000021762	432.765	616.823	582.832	629.739	652.411	533.394	488.576	546.456	OSBPL5
ENSG00000021776	197.698	237.506	132.912	216.542	302.905	320.625	202.282	245.216	AQR
ENSG00000021826	144.657	93.3882	139.516	103.852	101.674	176.491	123.979	122.149	CPS1
ENSG00000022267	382.135	228.282	288.114	270.677	243.595	419.656	371.938	371.957	FHL1
ENSG00000022277	3710.45	3870.42	3575.42	3548.64	3815.97	3452.35	3497.52	3272.31	RTF2
ENSG00000022567	112.109	217.906	184.921	138.101	198.053	203.945	164.762	179.091	SLC45A4
ENSG00000022840	2312.1	2806.26	2498.91	2653.74	2692.25	2890.53	2526.89	2629.42	RNF10
ENSG00000022976	97.6434	79.5529	84.2052	72.9172	67.783	115.699	86.4593	76.2283	ZNF839
ENSG00000023041	473.751	302.07	411.945	420.931	383.397	398.085	403.748	482.167	ZDHHC6
ENSG00000023171	828.161	669.858	589.436	1182.14	1043.22	1086.4	759.373	872.493	GRAMD1B
ENSG00000023191	4117.9	5290.84	5023.42	4582.73	4039.44	3500.4	3577.46	3375.17	RNH1
ENSG00000023228	763.065	659.482	719.046	633.054	600.515	791.267	809.944	836.675	NDUFS1
ENSG00000023287	1805.8	1238.26	1206.12	1402	1511.35	1606.07	1767.52	1817.54	RB1CC1
ENSG00000023318	986.078	864.705	870.946	982.172	1111.01	881.473	1057.09	1082.81	ERP44
ENSG00000023330	672.654	567.247	700.884	584.442	592.042	693.216	872.749	755.854	ALAS1
ENSG00000023445	60.2737	49.5764	55.3112	191.131	70.9603	56.8692	44.8609	92.7597	BIRC3
ENSG00000023516	432.765	363.176	506.057	449.656	391.87	645.172	464.922	624.521	AKAP11
ENSG00000023572	309.807	178.706	266.65	256.315	328.324	311.8	372.754	434.41	GLRX2
ENSG00000023608	198.903	204.07	162.632	214.332	188.521	238.262	225.12	199.296	SNAPC1
ENSG00000023697	600.326	532.658	683.548	628.634	512.609	689.294	631.316	652.992	DERA
ENSG00000023734	3227.05	2903.1	3147.79	2864.76	2911.49	3242.53	3246.3	3724.17	STRAP
ENSG00000023839	15.6712	18.447	15.6853	8.83845	8.47287	17.6491	13.0505	22.0419	ABCC2
ENSG00000023902	1304.32	1283.22	955.976	1336.82	948.961	804.994	1157.41	889.943	PLEKHO1
ENSG00000023909	295.341	267.482	279.858	226.485	245.713	231.399	377.648	337.976	GCLM
ENSG00000024048	458.08	600.682	489.546	531.412	542.264	678.509	508.968	569.416	UBR2
ENSG00000024422	5425.84	8536.37	7878.96	7174.61	7275.02	6181.1	6297.66	5853.97	EHD2
ENSG00000024526	456.875	284.776	425.154	435.293	416.23	617.718	420.877	730.139	DEPDC1
ENSG00000024862	144.657	157.953	157.678	188.922	178.989	124.524	180.259	191.948	CCDC28A
ENSG00000025039	332.711	333.2	414.422	349.119	330.442	372.592	287.11	207.561	RRAGD
ENSG00000025156	192.876	171.788	168.41	161.302	208.644	216.691	191.679	244.298	HSF2
ENSG00000025293	1341.69	1706.35	1180.52	1278.26	1555.83	1349.17	1279.76	1209.55	PHF20
ENSG00000025434	154.301	186.776	186.572	256.315	162.044	184.335	151.712	134.088	NR1H3
ENSG00000025708	179.616	232.894	82.5541	253.001	309.26	111.777	213.701	119.394	TYMP
ENSG00000025770	849.859	955.788	768.579	898.207	890.71	833.428	617.45	651.155	NCAPH2
ENSG00000025772	2418.18	1539.18	2261.98	1902.48	1333.42	1801.19	1968.99	2251.95	TOMM34
ENSG00000025796	2291.61	2232.09	2008.54	2336.66	2326.86	1846.29	1946.15	2195.93	SEC63
ENSG00000025800	1334.46	1347.79	1324.99	1178.83	1563.24	1151.11	1471.44	1333.54	KPNA6
ENSG00000026025	77110.5	70445.8	84675.7	67534.6	64635.3	52407.9	68847.7	66486.7	VIM
ENSG00000026036	119.342	73.7882	113.925	104.957	122.857	57.8497	109.298	133.17	RTEL1-TNFRSF6B
ENSG00000026103	343.56	487.694	389.655	397.73	387.634	390.241	355.625	338.895	FAS
ENSG00000026297	556.929	375.859	434.235	553.508	382.338	329.449	427.402	433.491	RNASET2
ENSG00000026508	13289.1	10866.5	13855.9	13248.8	9840.18	11033.6	12769.9	13960.8	CD44
ENSG00000026559	38.5752	6.91764	20.6385	5.52403	32.8324	24.5126	39.967	49.5943	KCNG1
ENSG00000026652	109.698	108.376	97.4138	134.786	99.5562	125.505	132.952	99.1886	AGPAT4
ENSG00000026751	40.9861	61.1058	16.5108	41.9826	26.4777	24.5126	23.6539	22.0419	SLAMF7
ENSG00000026950	122.958	198.306	138.691	230.904	193.817	165.705	146.818	133.17	BTN3A1
ENSG00000027001	235.067	174.094	260.045	165.721	168.398	185.315	241.433	258.074	MIPEP
ENSG00000027075	9.64379	5.7647	9.90649	16.5721	16.9457	8.82454	10.6035	6.42889	PRKCH
ENSG00000027697	493.039	517.67	472.209	631.949	633.347	575.556	578.298	689.728	IFNGR1
ENSG00000027847	892.051	952.329	785.089	803.194	811.277	566.731	712.881	715.444	B4GALT7
ENSG00000027869	81.9722	43.8117	49.5325	58.5547	87.906	44.1227	61.174	56.0232	SH2D2A
ENSG00000028116	107.287	139.506	128.784	121.529	119.679	178.452	127.242	126.741	VRK2
ENSG00000028137	48.219	41.5059	56.1368	96.1181	50.8372	60.7913	45.6766	65.2073	TNFRSF1B
ENSG00000028203	930.626	1051.48	991.475	1200.92	1019.92	1162.88	850.726	1067.2	VEZT
ENSG00000028277	276.054	292.847	242.709	370.11	291.255	161.783	179.444	185.519	POU2F2
ENSG00000028310	744.983	684.847	760.323	755.687	780.563	485.35	670.467	664.013	BRD9
ENSG00000028528	1094.57	1548.4	1173.09	1332.4	1735.88	1973.75	1193.3	1103.93	SNX1
ENSG00000028839	190.465	156.8	181.619	151.358	159.925	207.867	194.126	239.706	TBPL1
ENSG00000029153	497.861	476.164	534.125	475.066	588.864	778.52	519.571	753.099	ARNTL2
ENSG00000029363	1433.31	1230.19	1386.08	1446.19	1334.48	1464.87	1400.48	1651.31	BCLAF1
ENSG00000029364	543.669	681.388	647.224	726.962	617.46	758.91	632.947	713.607	SLC39A9
ENSG00000029534	216.985	973.082	348.378	336.966	438.471	340.235	301.792	236.951	ANK1
ENSG00000029639	159.123	88.7764	132.087	107.166	111.206	123.544	118.27	137.762	TFB1M
ENSG00000029725	1579.17	1400.82	1492.58	1407.52	1334.48	1938.46	1503.25	1709.17	RABEP1
ENSG00000029993	1428.49	1362.78	1323.34	1351.18	1592.9	1366.82	1433.1	1621.92	HMGB3
ENSG00000030066	371.286	387.388	465.605	510.42	473.422	680.47	446.162	517.985	NUP160
ENSG00000030110	368.875	383.929	429.281	375.634	338.915	345.137	342.574	315.934	BAK1
ENSG00000030419	32.5478	17.2941	73.4731	40.8778	22.2413	32.3566	23.6539	31.2261	IKZF2
ENSG00000030582	12455	14455.6	11683.9	10733.2	9972.57	8081.31	10743.8	8774.52	GRN
ENSG00000031003	591.888	552.258	539.078	568.975	604.751	856.961	680.255	706.26	FAM13B
ENSG00000031081	247.122	486.541	369.017	356.852	478.717	443.188	386.62	315.016	ARHGAP31
ENSG00000031691	195.287	155.647	209.687	196.655	151.453	170.608	165.578	232.359	CENPQ
ENSG00000031698	1473.09	1773.22	1456.25	1435.14	1340.83	1246.22	1324.62	1257.31	SARS
ENSG00000031823	894.462	1148.33	1166.49	1133.53	1314.35	1132.48	993.466	994.642	RANBP3
ENSG00000032219	600.326	546.494	446.618	620.901	496.722	439.266	513.862	474.82	ARID4A
ENSG00000032389	383.341	294	377.272	328.127	309.26	327.488	318.105	342.568	EIPR1
ENSG00000032444	2232.54	2764.75	2541.02	2597.4	2733.56	1970.81	2030.16	2291.44	PNPLA6
ENSG00000032742	206.136	124.518	164.283	215.437	228.767	196.101	197.388	232.359	IFT88
ENSG00000033011	368.875	476.164	437.537	433.084	401.402	325.527	412.721	410.531	ALG1
ENSG00000033030	308.601	306.682	280.684	299.402	283.841	335.332	311.58	333.384	ZCCHC8
ENSG00000033050	1041.53	1458.47	1524.77	1093.76	1116.3	1368.78	1082.37	1035.97	ABCF2
ENSG00000033100	2255.44	3122.16	3350.87	2096.92	2005.95	1893.35	2008.95	1946.12	CHPF2
ENSG00000033170	467.724	294	329.391	398.835	378.102	459.856	566.879	501.454	FUT8
ENSG00000033178	543.669	428.894	637.318	551.298	426.821	551.043	512.23	627.276	UBA6
ENSG00000033327	201.314	289.388	237.756	340.28	285.959	375.533	231.646	211.235	GAB2
ENSG00000033627	423.121	538.423	549.81	448.551	450.121	415.734	429.849	385.734	ATP6V0A1
ENSG00000033800	278.464	335.506	234.454	291.669	263.718	430.441	247.143	270.932	PIAS1
ENSG00000033867	729.312	573.011	698.408	1013.11	618.519	615.757	791.999	861.472	SLC4A7
ENSG00000034053	210.958	251.341	151.074	170.14	229.827	212.769	219.411	174.499	APBA2
ENSG00000034152	843.832	1158.71	999.73	1093.76	1350.36	1054.04	1027.72	1125.97	MAP2K3
ENSG00000034510	57979.7	42077.7	45394	46939.9	49575.8	36048.2	46719.8	41664.7	TMSB10
ENSG00000034533	186.848	176.4	191.526	164.616	128.152	180.413	185.153	160.722	ASTE1
ENSG00000034677	308.601	317.059	317.008	338.071	255.245	387.299	363.781	414.204	RNF19A
ENSG00000034693	238.684	232.894	255.092	216.542	254.186	208.847	241.433	258.074	PEX3
ENSG00000034713	1176.54	1103.36	1083.11	1078.29	1204.21	1049.14	1195.75	1023.11	GABARAPL2
ENSG00000035115	61.4792	73.7882	62.7411	49.7163	76.2558	79.4208	97.0628	74.3915	SH3YL1
ENSG00000035141	693.147	586.847	619.981	591.071	701.13	700.08	630.5	714.526	FAM136A
ENSG00000035403	3636.91	4401.93	4041.85	4751.77	3644.39	4047.52	3805.84	4194.39	VCL
ENSG00000035499	124.164	108.376	153.551	165.721	135.566	188.257	151.712	206.643	DEPDC1B
ENSG00000035664	31.3423	72.6352	23.9407	64.0787	66.7238	77.4598	32.6261	50.5127	DAPK2
ENSG00000035681	1157.25	939.646	1168.97	1036.31	976.498	1441.34	1162.31	1147.1	NSMAF
ENSG00000035687	981.256	1053.79	1056.69	1171.09	1011.45	1257.99	1010.59	1138.83	ADSS
ENSG00000035862	13484.4	17459	16095.6	17636	18145.7	17124.5	15698.9	16723.4	TIMP2
ENSG00000035928	963.174	715.976	867.644	829.709	725.489	932.459	787.106	806.367	RFC1
ENSG00000036054	654.572	571.858	694.28	747.954	531.673	743.222	676.992	801.775	TBC1D23
ENSG00000036257	458.08	503.835	489.546	437.503	384.456	608.893	557.091	568.498	CUL3
ENSG00000036530	16.8766	12.6823	18.1619	9.94325	11.6502	11.766	17.9444	15.613	CYP46A1
ENSG00000036549	472.546	377.012	470.558	465.123	362.215	591.244	458.397	507.883	AC118549.1
ENSG00000037042	245.917	389.694	269.126	285.04	310.319	177.471	221.858	177.254	TUBG2
ENSG00000037241	473.751	410.447	307.101	369.005	495.663	353.962	508.152	539.109	RPL26L1
ENSG00000037474	804.051	903.905	1078.16	840.757	952.139	1167.78	1035.88	1125.06	NSUN2
ENSG00000037637	230.246	253.647	227.024	196.655	212.881	253.951	225.936	232.359	FBXO42
ENSG00000037749	78.3558	131.435	136.214	169.035	100.615	275.522	93.8001	157.967	MFAP3
ENSG00000037757	218.191	222.517	243.535	265.153	231.945	234.34	203.913	181.846	MRI1
ENSG00000037897	244.711	227.129	260.045	232.009	284.9	171.588	234.908	273.687	METTL1
ENSG00000037965	34.9587	47.2706	36.3238	33.1442	24.3595	24.5126	38.3357	28.4708	HOXC8
ENSG00000038002	638.901	473.859	736.383	532.516	419.407	695.177	634.578	587.785	AGA
ENSG00000038210	173.588	145.27	158.504	191.131	158.866	159.822	175.365	174.499	PI4K2B
ENSG00000038219	1649.09	1280.92	1277.11	1343.44	1311.18	1179.55	1388.24	1481.4	BOD1L1
ENSG00000038274	1109.04	780.541	960.104	1128.01	946.843	1299.17	1310.75	1391.4	MAT2B
ENSG00000038358	417.094	499.223	590.262	561.241	446.944	596.146	412.721	437.165	EDC4
ENSG00000038382	3112.53	3343.53	3822.25	4023.7	2889.25	4719.17	3462.45	4007.04	TRIO
ENSG00000038427	743.777	2790.12	1257.3	1103.7	900.242	746.164	1875.19	942.292	VCAN
ENSG00000038532	343.56	353.953	515.138	414.302	395.048	466.72	416.799	440.838	CLEC16A
ENSG00000038945	27.7259	48.4235	52.0091	110.481	54.0145	43.1422	29.3635	17.4499	MSR1
ENSG00000039123	676.271	562.635	640.62	672.827	648.175	844.214	685.149	905.556	MTREX
ENSG00000039139	33.7533	59.9529	52.8346	38.6682	38.1279	44.1227	34.2574	44.0838	DNAH5
ENSG00000039319	318.245	245.576	324.438	323.708	342.092	364.748	438.822	464.717	ZFYVE16
ENSG00000039523	362.848	519.976	404.515	424.245	384.456	335.332	418.43	368.284	RIPOR1
ENSG00000039560	2392.87	1472.3	1736.11	2073.72	1999.6	2654.22	2056.26	2241.85	RAI14
ENSG00000039650	405.039	466.941	389.655	396.625	421.525	315.722	328.708	296.648	PNKP
ENSG00000040199	267.615	274.4	302.148	245.267	295.491	416.714	261.009	298.484	PHLPP2
ENSG00000040275	242.3	189.082	223.722	268.468	243.595	255.912	274.06	314.097	SPDL1
ENSG00000040341	687.12	736.729	642.271	638.578	772.09	972.66	770.792	796.264	STAU2
ENSG00000040487	444.82	455.411	421.026	433.084	442.707	392.202	433.928	432.573	PQLC2
ENSG00000040531	439.998	378.164	376.447	426.455	315.614	430.441	376.016	377.468	CTNS
ENSG00000040608	56.6573	63.4117	61.9156	50.8211	51.8963	60.7913	59.5427	53.268	RTN4R
ENSG00000040633	1201.86	1238.26	1241.61	1168.88	888.592	935.401	1059.53	943.21	PHF23
ENSG00000040731	57.8627	66.8705	62.7411	58.5547	46.6008	51.9667	52.2018	53.268	CDH10
ENSG00000040933	169.972	210.988	196.479	209.913	191.699	274.541	233.277	214.909	INPP4A
ENSG00000041353	219.396	62.2588	157.678	155.778	109.088	141.193	200.651	200.214	RAB27B
ENSG00000041357	2038.46	2459.22	1823.62	1903.58	2735.68	1812.95	2079.92	2366.75	PSMA4
ENSG00000041802	354.409	343.576	416.898	413.197	388.693	382.397	376.832	371.957	LSG1
ENSG00000041880	429.149	473.859	404.515	425.35	405.639	384.358	379.279	300.321	PARP3
ENSG00000041982	260.382	159.106	272.429	187.817	135.566	144.134	439.637	434.41	TNC
ENSG00000041988	188.054	153.341	179.968	162.406	144.039	141.193	170.472	153.375	THAP3
ENSG00000042088	303.779	319.364	365.715	405.464	290.196	402.987	322.999	361.855	TDP1
ENSG00000042286	424.327	476.164	394.609	445.237	347.388	361.806	451.872	429.817	AIFM2
ENSG00000042317	154.301	100.306	137.04	160.197	78.374	129.427	134.583	128.578	SPATA7
ENSG00000042429	192.876	157.953	169.236	236.428	188.521	150.017	215.332	232.359	MED17
ENSG00000042445	638.901	695.223	532.474	557.927	615.342	608.893	578.298	563.906	RETSAT
ENSG00000042493	1745.53	1764	1645.3	1115.85	941.548	854.019	1385.8	1239.86	CAPG
ENSG00000042753	3112.53	3695.17	3135.4	3282.38	3701.58	2691.48	2597.04	2484.31	AP2S1
ENSG00000042832	13.2602	14.9882	9.90649	29.8298	18.0048	29.4151	18.76	6.42889	TG
ENSG00000043093	274.848	282.47	280.684	293.878	309.26	324.547	345.021	376.549	DCUN1D1
ENSG00000043143	1397.14	1480.38	1523.12	1200.92	1264.58	1779.61	1145.99	1227	JADE2
ENSG00000043355	114.52	104.918	117.227	116.005	106.97	89.2259	106.035	127.659	ZIC2
ENSG00000043514	208.547	137.2	176.666	145.834	165.221	179.432	207.992	178.172	TRIT1
ENSG00000044090	699.175	660.635	683.548	708.181	706.426	652.035	654.154	648.4	CUL7
ENSG00000044115	6059.92	7074.44	6990.68	7142.57	6205.32	7088.06	6628.82	6578.59	CTNNA1
ENSG00000044446	259.177	277.859	272.429	270.677	255.245	273.561	243.065	262.666	PHKA2
ENSG00000044459	466.518	303.223	298.846	371.215	306.082	373.572	341.759	384.815	CNTLN
ENSG00000044574	9919.84	8656.28	8529.49	12052.3	8977.01	9667.77	10513.8	11067.8	HSPA5
ENSG00000046604	606.353	992.682	724.825	908.15	805.982	852.058	604.399	575.845	DSG2
ENSG00000046647	197.698	137.2	134.563	155.778	128.152	142.173	145.186	150.62	GEMIN8
ENSG00000046651	226.629	162.565	137.865	156.882	171.576	117.66	187.6	139.599	OFD1
ENSG00000046653	9.64379	14.9882	14.0342	12.1529	15.8866	8.82454	13.8661	11.9394	GPM6B
ENSG00000047056	308.601	356.259	340.948	369.005	378.102	402.987	293.635	337.976	WDR37
ENSG00000047188	318.245	335.506	369.842	369.005	366.452	436.324	333.602	389.407	YTHDC2
ENSG00000047230	571.395	379.317	542.38	559.032	485.072	452.993	372.754	498.698	CTPS2
ENSG00000047249	1154.84	1189.83	1146.68	1089.34	1127.95	1123.66	1182.7	1148.02	ATP6V1H
ENSG00000047315	984.872	849.717	1034.4	922.513	965.907	1159.94	953.499	1161.79	POLR2B
ENSG00000047346	112.109	178.706	127.133	136.996	223.472	180.413	174.55	154.293	FAM214A
ENSG00000047365	48.219	73.7882	52.0091	89.4893	96.3789	106.875	74.2245	96.4334	ARAP2
ENSG00000047410	1620.16	1577.22	1650.26	1726.81	1602.43	2024.74	1602.76	1830.4	TPR
ENSG00000047578	317.04	441.576	451.571	396.625	431.057	501.038	370.307	322.363	KIAA0556
ENSG00000047579	449.642	397.764	383.051	327.023	375.984	312.781	360.519	322.363	DTNBP1
ENSG00000047621	220.602	168.329	219.594	198.865	193.817	213.75	204.729	244.298	C12orf4
ENSG00000047634	231.451	235.2	261.696	288.354	262.659	339.254	221.042	287.463	SCML1
ENSG00000047644	1439.34	1606.05	1469.46	1339.02	1658.56	1995.33	1799.33	1751.41	WWC3
ENSG00000047849	8051.36	9042.51	9820.64	8173.35	7428.59	8803.95	8995.84	9393.53	MAP4
ENSG00000047932	828.161	812.823	808.205	767.84	682.066	892.259	978.784	1090.16	GOPC
ENSG00000048028	107.287	58.8	89.984	122.633	57.1919	95.1089	64.4366	82.6572	USP28
ENSG00000048052	202.52	175.247	210.513	162.406	126.034	146.095	158.237	207.561	HDAC9
ENSG00000048140	1457.42	2262.07	1811.24	1588.71	1484.87	1527.63	1294.44	1233.43	TSPAN17
ENSG00000048162	619.614	560.329	600.168	458.494	642.879	520.648	595.427	571.253	NOP16
ENSG00000048342	61.4792	56.4941	81.7286	86.1749	66.7238	82.3623	72.5932	67.9626	CC2D2A
ENSG00000048392	578.627	495.764	607.598	478.381	374.924	728.515	687.596	687.892	RRM2B
ENSG00000048405	207.342	272.094	246.837	250.791	169.457	268.658	211.254	247.053	ZNF800
ENSG00000048471	196.492	225.976	205.56	216.542	276.427	270.619	211.254	201.133	SNX29
ENSG00000048544	652.161	547.647	655.48	619.796	631.229	614.776	622.344	662.176	MRPS10
ENSG00000048649	1371.83	1329.34	1283.72	1352.28	1531.47	1277.6	1102.76	1172.81	RSF1
ENSG00000048707	379.724	386.235	387.179	430.874	349.506	433.383	374.385	345.323	VPS13D
ENSG00000048740	364.053	676.776	373.97	412.093	517.904	580.458	317.289	353.589	CELF2
ENSG00000048828	3369.3	3396.56	3728.14	3410.54	3597.79	5075.09	3645.97	3824.27	FAM120A
ENSG00000048991	315.834	321.67	417.724	350.223	342.092	498.096	375.201	391.244	R3HDM1
ENSG00000049089	25.315	28.8235	30.545	25.4105	43.4235	42.1617	28.5479	19.2867	COL9A2
ENSG00000049130	244.711	238.659	324.438	294.983	209.704	247.087	342.574	305.832	KITLG
ENSG00000049167	115.725	70.3294	78.4264	86.1749	101.674	111.777	112.56	114.802	ERCC8
ENSG00000049192	982.461	769.011	818.937	803.194	612.165	762.832	721.038	844.94	ADAMTS6
ENSG00000049239	1215.12	1344.33	1470.29	1297.04	1283.64	1006	1103.58	1141.59	H6PD
ENSG00000049245	1527.34	1875.83	1684.93	1546.73	1410.73	1766.87	1431.47	1480.48	VAMP3
ENSG00000049246	19.2876	43.8117	25.5918	35.3538	44.4826	57.8497	30.9948	35.8181	PER3
ENSG00000049323	32.5478	20.7529	25.5918	26.5153	44.4826	54.9082	75.8558	56.9416	LTBP1
ENSG00000049449	4883.37	5961.85	5243.84	5845.53	5872.76	5091.76	4136.18	4775.75	RCN1
ENSG00000049541	597.915	506.141	635.667	591.071	565.564	530.453	519.571	558.395	RFC2
ENSG00000049618	813.695	876.235	901.491	970.019	900.242	941.284	805.866	965.252	ARID1B
ENSG00000049656	1632.21	1920.8	1924.34	1724.6	1705.17	1785.5	1729.19	1781.72	CLPTM1L
ENSG00000049759	871.558	1134.49	831.32	841.862	969.084	1072.67	659.864	886.269	NEDD4L
ENSG00000049769	248.328	283.623	203.083	165.721	255.245	294.151	250.406	220.419	PPP1R3F
ENSG00000049860	2760.54	2305.88	2450.21	2473.66	2245.31	2581.67	2353.16	2591.76	HEXB
ENSG00000049883	196.492	138.353	184.096	148.044	129.211	170.608	154.158	178.172	PTCD2
ENSG00000050130	549.696	499.223	509.359	628.634	502.018	510.843	611.74	696.157	JKAMP
ENSG00000050165	3476.59	11791.1	5299.97	6781.3	7261.25	5397.68	2557.89	2378.69	DKK 3.00
ENSG00000050327	80.7667	157.953	111.448	95.0133	78.374	82.3623	58.727	67.0442	ARHGEF5
ENSG00000050344	615.997	493.458	463.954	555.717	446.944	460.837	637.025	865.145	NFE2L3
ENSG00000050393	421.916	408.141	512.661	380.053	453.299	583.4	567.695	619.011	MCUR1
ENSG00000050405	11376.1	13879.1	12514.4	12760.5	10771.1	15724.3	10877.6	12049.6	LIMA1
ENSG00000050426	911.338	741.341	714.093	933.561	755.145	960.894	827.888	868.819	LETMD1
ENSG00000050438	30.1368	20.7529	25.5918	16.5721	20.1231	25.4931	34.2574	59.6969	SLC4A8
ENSG00000050748	888.434	978.846	1022.85	887.159	999.799	1270.73	930.661	1010.25	MAPK9
ENSG00000050820	4318.01	3727.46	3606.79	4510.92	3130.73	3314.1	2960.82	2746.97	BCAR1
ENSG00000051009	270.026	276.706	328.565	301.612	272.191	319.644	250.406	250.727	FAM160A2
ENSG00000051108	1714.18	2185.97	1481.85	2388.59	1967.82	2463.03	1792.81	1434.56	HERPUD1
ENSG00000051128	4630.23	4633.67	5091.11	3852.46	4184.54	3688.66	4340.09	3751.72	HOMER3
ENSG00000051180	59.0682	142.965	65.2177	111.585	121.798	119.621	88.0906	101.944	RAD51
ENSG00000051341	207.342	179.859	254.267	166.826	181.108	300.034	187.6	281.034	POLQ
ENSG00000051382	527.998	475.011	522.567	496.058	443.767	737.339	529.359	614.419	PIK3CB
ENSG00000051523	9799.3	10323.4	9416.12	8678.25	10034	5254.52	8306.61	8022.34	CYBA
ENSG00000051596	277.259	244.423	359.11	280.621	198.053	295.132	298.529	288.382	THOC3
ENSG00000051620	332.711	606.447	301.322	297.193	479.776	343.176	353.178	340.731	HEBP2
ENSG00000051825	213.369	145.27	265.824	204.389	172.635	286.307	198.204	330.629	MPHOSPH9
ENSG00000052126	547.285	485.388	458.175	585.547	601.574	711.846	606.03	649.318	PLEKHA5
ENSG00000052723	166.355	126.823	214.641	235.324	207.585	260.814	209.623	202.051	SIKE1
ENSG00000052749	881.201	922.352	1007.16	757.897	962.73	599.088	886.615	858.716	RRP12
ENSG00000052795	115.725	275.553	123.831	125.948	154.63	146.095	99.5097	76.2283	FNIP2
ENSG00000052802	855.886	506.141	997.254	798.775	703.248	1170.72	823.81	1278.43	MSMO1
ENSG00000052841	667.833	672.164	662.084	763.421	811.277	836.37	682.702	726.465	TTC17
ENSG00000052850	6.02737	21.9059	9.08095	11.0481	21.1822	10.7855	10.6035	9.18413	ALX4
ENSG00000053254	478.573	659.482	382.225	595.49	492.486	752.047	563.616	468.391	FOXN3
ENSG00000053371	798.024	677.929	742.161	712.6	641.82	771.657	744.692	754.936	AKR7A2
ENSG00000053372	1119.89	976.541	1032.75	823.08	1098.3	723.612	969.812	985.457	MRTO4
ENSG00000053501	438.792	490	512.661	557.927	583.569	369.65	482.867	358.181	USE1
ENSG00000053702	19.2876	16.1412	20.6385	15.4673	22.2413	13.7271	21.207	22.9603	NRIP2
ENSG00000053747	75.9449	103.765	94.1117	77.3364	74.1376	100.992	84.828	71.6362	LAMA3
ENSG00000053770	311.012	262.87	242.709	289.459	217.117	378.475	327.893	323.281	AP5M1
ENSG00000053900	161.533	118.753	146.121	118.214	136.625	166.686	166.393	177.254	ANAPC4
ENSG00000054116	1066.84	1095.29	1017.89	890.473	1140.66	905.005	1157.41	1065.36	TRAPPC3
ENSG00000054118	1556.27	1574.92	1547.89	1600.86	1824.84	1580.57	1684.32	1788.15	THRAP3
ENSG00000054148	3189.68	2891.57	2685.48	2418.42	2691.2	1758.04	3047.28	2324.5	PHPT1
ENSG00000054267	1288.65	1050.33	965.883	1078.29	1064.4	928.537	1134.57	1120.46	ARID4B
ENSG00000054277	31.3423	20.7529	26.4173	49.7163	22.2413	50.9862	36.7044	56.0232	OPN3
ENSG00000054282	781.147	571.858	565.496	645.207	635.465	569.673	592.164	571.253	SDCCAG8
ENSG00000054392	67.5065	155.647	94.9372	70.7076	102.734	102.953	115.823	109.291	HHAT
ENSG00000054523	752.216	665.247	765.277	796.565	674.652	861.863	787.106	787.999	KIF1B
ENSG00000054598	300.163	387.388	353.332	374.529	377.043	440.246	362.966	392.162	FOXC1
ENSG00000054611	554.518	667.552	637.318	576.709	583.569	590.263	534.253	476.657	TBC1D22A
ENSG00000054654	526.792	571.858	508.533	729.172	881.178	858.922	530.175	607.071	SYNE2
ENSG00000054690	16.8766	14.9882	5.77879	8.83845	10.5911	19.6101	20.3913	21.1235	PLEKHH1
ENSG00000054793	507.504	509.6	416.898	465.123	574.037	653.016	453.503	470.228	ATP9A
ENSG00000054965	647.339	668.705	746.289	804.299	673.593	865.785	638.657	651.155	FAM168A
ENSG00000054967	209.752	265.176	290.59	276.201	283.841	207.867	203.098	254.4	RELT
ENSG00000054983	379.724	442.729	417.724	507.106	356.92	536.336	308.317	426.144	GALC
ENSG00000055044	1218.73	831.27	1031.93	912.57	988.148	647.133	973.89	1276.59	NOP58
ENSG00000055070	2884.7	3575.27	3290.61	3260.28	3849.86	3618.06	2996.71	3057.4	SZRD1
ENSG00000055130	905.311	1294.75	1315.09	931.351	1065.46	1265.83	1074.22	1183.83	CUL1
ENSG00000055147	341.149	282.47	302.974	324.813	274.309	338.274	318.105	322.363	FAM114A2
ENSG00000055163	277.259	157.953	213.815	186.712	219.236	247.087	265.903	251.645	CYFIP2
ENSG00000055208	1100.6	1071.08	1080.63	1155.63	1138.54	1621.75	1024.46	1208.63	TAB2
ENSG00000055211	805.257	922.352	690.152	992.116	944.725	747.144	795.262	792.591	GINM1
ENSG00000055332	726.901	775.929	664.561	651.835	735.021	882.454	654.97	708.097	EIF2AK2
ENSG00000055483	933.037	968.47	888.282	1132.43	942.607	706.943	814.838	862.39	USP36
ENSG00000055609	699.175	740.188	822.239	724.753	621.697	883.434	830.335	764.12	KMT2C
ENSG00000055917	738.955	676.776	714.093	817.556	751.967	1193.27	907.007	1000.15	PUM2
ENSG00000055950	1414.02	1120.66	1272.16	1097.07	1198.91	987.368	1304.23	1196.69	MRPL43
ENSG00000056050	239.889	178.706	178.317	166.826	247.831	171.588	231.646	235.114	HPF1
ENSG00000056097	1244.05	1126.42	1151.63	1196.5	1089.82	1657.05	1168.83	1486.91	ZFR
ENSG00000056277	74.7394	57.647	54.4857	87.2797	72.0194	82.3623	59.5427	77.1467	ZNF280C
ENSG00000056558	31.3423	26.5176	38.8004	71.8124	24.3595	31.3761	44.0453	31.2261	TRAF1
ENSG00000056586	377.313	428.894	323.612	393.311	371.747	489.272	425.771	493.188	RC3H2
ENSG00000056736	37.3697	39.2	40.4515	36.4586	32.8324	36.2787	39.1514	53.268	IL17RB
ENSG00000056972	355.615	311.294	321.135	418.721	346.329	279.444	318.105	302.158	TRAF3IP2
ENSG00000056998	191.67	152.188	187.398	116.005	173.694	195.12	238.171	235.114	GYG2
ENSG00000057019	6833.83	7798.49	7557	8101.54	9199.42	10796.3	6514.62	8716.66	DCBLD2
ENSG00000057252	595.504	486.541	626.586	599.91	523.2	576.536	599.505	778.814	SOAT1
ENSG00000057294	571.395	765.552	662.909	772.259	713.839	1058.94	631.316	561.151	PKP2
ENSG00000057608	2989.58	2837.39	2678.88	2935.47	2404.18	3038.58	2822.98	3004.13	GDI2
ENSG00000057657	55.4518	62.2588	50.358	60.7643	37.0688	23.5321	43.2296	36.7365	PRDM1
ENSG00000057663	402.628	438.117	366.54	357.957	380.22	414.753	393.961	438.083	ATG5
ENSG00000057704	74.7394	94.5411	76.7753	61.8691	67.783	73.5378	47.3079	53.268	TMCC3
ENSG00000057757	435.176	531.506	403.69	418.721	534.85	521.628	421.693	463.799	PITHD1
ENSG00000057935	394.19	318.212	291.416	332.547	300.787	318.664	340.127	371.957	MTA3
ENSG00000058056	243.506	191.388	224.547	194.446	223.472	273.561	204.729	250.727	USP13
ENSG00000058063	325.478	229.435	331.042	428.665	347.388	499.077	376.832	468.391	ATP11B
ENSG00000058085	4301.13	10362.6	9154.42	6127.25	6513.52	4187.73	5110.07	3627.73	LAMC2
ENSG00000058091	437.587	363.176	513.486	457.39	464.949	659.879	442.084	494.106	CDK14
ENSG00000058262	13349.4	16053.5	15335.2	12225.8	13770.5	11041.5	11746.2	11572.9	SEC61A1
ENSG00000058272	1744.32	1622.19	1546.24	1521.32	1633.15	1283.48	1553	1936.93	PPP1R12A
ENSG00000058335	611.175	893.529	686.85	789.936	986.03	1156.99	640.288	727.383	RASGRF1
ENSG00000058404	74.7394	50.7294	71.8221	17.6769	65.6647	36.2787	46.4922	44.0838	CAMK2B
ENSG00000058453	194.081	283.623	229.5	218.752	249.95	198.062	289.557	194.704	CROCC
ENSG00000058600	524.381	575.317	603.47	531.412	675.711	676.548	584.008	580.437	POLR3E
ENSG00000058668	2832.86	1855.08	2680.53	2172.05	1589.72	2302.22	2508.13	2683.6	ATP2B4
ENSG00000058673	1673.2	1761.69	1747.67	1963.24	1984.77	2357.13	1989.38	2035.2	ZC3H11A
ENSG00000058729	341.149	330.894	393.783	325.918	397.166	421.617	455.95	442.675	RIOK2
ENSG00000058799	311.012	347.035	317.833	302.717	275.368	279.444	296.898	298.484	YIPF1
ENSG00000058804	385.752	300.917	460.652	460.704	420.466	481.428	359.703	581.356	NDC1
ENSG00000058866	21.6985	12.6823	8.25541	8.83845	18.0048	18.6296	17.9444	14.6946	DGKG
ENSG00000059122	741.366	763.247	763.625	659.569	583.569	611.835	597.874	591.458	FLYWCH1
ENSG00000059145	209.752	224.823	216.292	212.123	187.462	237.282	225.936	230.522	UNKL
ENSG00000059377	18.0821	13.8353	20.6385	9.94325	6.35465	8.82454	10.6035	16.5314	TBXAS1
ENSG00000059378	407.45	928.117	560.542	482.8	482.954	603.01	413.536	404.102	PARP12
ENSG00000059573	1360.98	1209.43	1520.65	1368.85	1402.26	1369.76	1396.4	1503.44	ALDH18A1
ENSG00000059588	271.232	214.447	264.999	214.332	220.295	311.8	318.105	345.323	TARBP1
ENSG00000059691	237.478	172.941	188.223	192.236	206.526	210.808	235.724	262.666	GATB
ENSG00000059728	53.0408	44.9647	63.5667	50.8211	70.9603	90.2064	72.5932	64.2889	MXD1
ENSG00000059758	749.805	649.105	790.043	879.425	813.395	827.545	695.752	966.171	CDK17
ENSG00000059769	167.561	198.306	149.423	205.494	224.531	131.388	150.896	153.375	DNAJC25
ENSG00000059804	2152.98	1686.75	1839.31	4779.39	1239.16	2549.31	1781.39	2040.71	SLC2A3
ENSG00000059915	245.917	129.129	160.155	209.913	130.27	136.29	241.433	187.356	PSD
ENSG00000060069	400.217	420.823	459.826	434.189	420.466	448.09	443.715	442.675	CTDP1
ENSG00000060138	3695.98	4337.36	3423.52	3947.47	3670.87	3213.11	3777.29	3128.12	YBX3
ENSG00000060237	1620.16	1705.2	1815.36	1828.45	2106.57	2738.55	1967.36	2253.79	WNK1
ENSG00000060339	1963.72	1879.29	1682.45	1680.41	2017.6	1582.53	1978.78	2151.84	CCAR1
ENSG00000060491	2144.54	1841.25	2245.47	2214.03	2369.23	1458.01	2080.73	1846.93	OGFR
ENSG00000060642	215.78	124.518	154.376	181.188	140.861	123.544	196.572	179.091	PIGV
ENSG00000060656	109.698	81.8588	93.2861	169.035	66.7238	97.0699	168.025	102.862	PTPRU
ENSG00000060688	401.423	357.412	405.341	384.472	356.92	423.578	378.463	405.939	SNRNP40
ENSG00000060718	161.533	335.506	192.351	280.621	251.009	330.43	216.964	240.624	COL11A1
ENSG00000060749	600.326	499.223	653.828	661.779	473.422	807.935	613.371	680.544	QSER1
ENSG00000060762	424.327	357.412	444.141	441.922	497.781	470.642	478.789	422.47	MPC1
ENSG00000060971	974.023	824.352	924.606	782.203	768.913	727.534	859.699	748.507	ACAA1
ENSG00000060982	1512.87	1557.62	989.824	1429.62	1376.84	1251.12	1362.14	1312.41	BCAT1
ENSG00000061273	1664.76	2032.63	1769.13	1968.76	2071.62	2101.22	1945.33	1744.99	HDAC7
ENSG00000061455	18.0821	26.5176	10.732	11.0481	12.7093	15.6881	26.9166	15.613	PRDM6
ENSG00000061656	348.382	262.87	208.862	286.145	172.635	149.037	153.343	146.946	SPAG4
ENSG00000061676	1834.73	1698.28	1892.14	1863.81	1783.54	2650.3	2079.92	2262.05	NCKAP1
ENSG00000061794	969.201	820.894	936.989	848.491	831.4	819.701	956.761	1025.87	MRPS35
ENSG00000061918	10.8493	8.07058	17.3364	13.2577	12.7093	14.7076	26.1009	10.1025	GUCY1B1
ENSG00000061936	725.695	760.941	821.413	770.05	802.804	622.62	749.585	738.404	SFSWAP
ENSG00000061938	509.915	469.247	532.474	435.293	540.145	463.778	501.627	499.617	TNK2
ENSG00000061987	338.738	394.306	384.702	435.293	341.033	405.929	355.625	449.104	MON2
ENSG00000062038	128.986	210.988	197.304	238.638	182.167	144.134	161.499	114.802	CDH3
ENSG00000062194	887.229	845.105	851.133	894.893	840.932	1026.59	956.761	1046.07	GPBP1
ENSG00000062282	33.7533	13.8353	32.1961	26.5153	13.7684	17.6491	30.1792	39.4918	DGAT2
ENSG00000062370	47.0135	47.2706	50.358	37.5634	37.0688	36.2787	41.5983	45.9207	ZNF112
ENSG00000062485	1749.14	1826.26	2135.67	1868.23	1742.23	2003.17	1767.52	1939.69	CS
ENSG00000062582	866.736	975.388	836.273	867.273	875.883	787.345	843.386	808.204	MRPS24
ENSG00000062598	433.971	383.929	476.337	397.73	478.717	502.018	549.75	491.351	ELMO2
ENSG00000062650	834.188	848.564	840.401	931.351	818.691	1023.65	924.951	979.947	WAPL
ENSG00000062716	5850.16	5304.68	4791.44	5539.5	4231.14	3205.27	6782.16	7513.54	VMP1
ENSG00000062725	954.735	992.682	916.351	952.343	927.779	1344.27	1053.01	1150.77	APPBP2
ENSG00000062822	494.244	443.882	580.355	517.049	513.668	526.531	380.094	427.981	POLD1
ENSG00000063046	6921.83	6479.53	6827.22	8536.83	6051.75	8212.7	6619.84	7065.35	EIF4B
ENSG00000063169	127.78	189.082	173.364	197.76	234.063	190.218	172.103	174.499	BICRA
ENSG00000063176	283.286	343.576	311.229	315.974	287.018	278.463	241.433	246.135	SPHK2
ENSG00000063177	15066	15990.1	15784.3	16625.1	17029.4	12435.7	13960.7	12108.4	RPL18
ENSG00000063180	55.4518	26.5176	48.7069	30.9346	61.4283	24.5126	53.8331	29.3892	CA11
ENSG00000063241	707.613	915.435	792.519	681.665	754.085	585.361	681.886	532.68	ISOC2
ENSG00000063244	3217.41	3020.7	4259.79	3641.44	3812.79	3630.81	3694.09	3555.18	U2AF2
ENSG00000063245	2814.78	4345.43	3975.81	3586.2	3776.78	3112.12	2914.33	2750.65	EPN1
ENSG00000063322	849.859	1009.98	951.849	1063.93	1213.74	1130.52	971.443	885.35	MED29
ENSG00000063438	14.4657	34.5882	22.2896	18.7817	19.064	23.5321	22.8383	12.8578	AHRR
ENSG00000063587	207.342	300.917	292.242	315.974	306.082	363.767	264.272	248.89	ZNF275
ENSG00000063601	417.094	451.953	471.384	485.01	493.545	743.222	439.637	480.33	MTMR1
ENSG00000063660	4758.01	7202.42	5740.81	3764.07	4514.98	3659.24	4433.08	3859.17	GPC1
ENSG00000063761	118.136	122.212	141.168	99.4325	102.734	108.836	113.376	102.862	ADCK1
ENSG00000063854	732.928	827.811	698.408	549.088	870.587	681.45	672.914	665.85	HAGH
ENSG00000063978	494.244	601.835	675.293	602.119	565.564	684.392	617.45	641.971	RNF4
ENSG00000064012	301.368	288.235	312.88	298.298	306.082	281.405	258.562	290.219	CASP8
ENSG00000064042	3915.38	3134.84	1755.1	2607.34	4546.75	4391.68	2274.86	2805.75	LIMCH1
ENSG00000064102	603.942	500.376	596.041	532.516	600.515	642.23	689.227	769.63	INTS13
ENSG00000064115	708.819	729.811	707.489	649.626	559.209	802.052	602.768	765.957	TM7SF3
ENSG00000064199	178.41	117.6	131.261	190.027	150.393	148.056	181.075	183.683	SPA17
ENSG00000064205	10.8493	3.45882	16.5108	11.0481	4.23643	11.766	9.78784	12.8578	WISP2
ENSG00000064225	155.506	192.541	107.32	155.778	152.512	90.2064	79.934	76.2283	ST3GAL6
ENSG00000064300	128.986	57.647	117.227	123.738	65.6647	60.7913	128.058	200.214	NGFR
ENSG00000064309	44.6025	141.812	56.1368	181.188	164.162	251.009	36.7044	45.0023	CDON
ENSG00000064313	230.246	208.682	244.36	249.686	226.649	338.274	253.668	290.219	TAF2
ENSG00000064393	1386.29	1327.03	1519	1062.82	1192.56	1477.62	1550.56	1506.2	HIPK2
ENSG00000064419	1109.04	1348.94	1296.92	977.753	1038.99	1346.23	1270.79	1159.96	TNPO3
ENSG00000064489	19.2876	34.5882	14.0342	27.6201	16.9457	20.5906	13.8661	8.26572	BORCS8-MEF2B
ENSG00000064490	789.585	969.623	864.341	802.089	898.124	669.684	709.618	615.337	RFXANK
ENSG00000064545	442.409	546.494	544.857	504.896	500.958	322.586	424.14	419.715	TMEM161A
ENSG00000064547	195.287	247.882	189.874	215.437	199.112	123.544	161.499	162.559	LPAR2
ENSG00000064601	7161.72	7974.89	6505.26	6046.6	6189.43	4631.9	6455.08	5358.94	CTSA
ENSG00000064607	771.503	900.446	877.55	837.443	875.883	888.337	743.06	855.043	SUGP2
ENSG00000064651	255.56	338.964	355.808	333.651	298.669	308.859	273.244	367.365	SLC12A2
ENSG00000064652	373.697	374.706	303.799	292.774	370.688	364.748	379.279	343.487	SNX24
ENSG00000064666	1338.08	4258.96	1444.7	3470.19	4496.98	2886.6	2612.54	2007.65	CNN2
ENSG00000064687	120.547	260.565	120.529	124.843	185.344	113.738	120.717	111.128	ABCA7
ENSG00000064692	74.7394	59.9529	34.6727	59.6595	93.2016	62.7523	69.3305	90.0045	SNCAIP
ENSG00000064703	173.588	149.882	212.99	146.939	206.526	212.769	192.494	192.867	DDX20
ENSG00000064726	675.065	863.552	676.118	841.862	822.927	1327.6	800.156	878.003	BTBD1
ENSG00000064763	143.451	132.588	165.934	203.284	144.039	156.881	165.578	168.988	FAR2
ENSG00000064886	331.505	142.965	247.662	159.092	230.886	205.906	196.572	246.135	CHI3L2
ENSG00000064932	1260.93	1383.53	1425.71	1557.78	1380.02	1444.28	1202.27	1237.1	SBNO2
ENSG00000064933	183.232	111.835	143.644	154.673	138.743	179.432	166.393	215.827	PMS1
ENSG00000064961	2091.5	2220.56	2143.1	2212.93	2314.15	2234.57	1993.46	1796.42	HMG20B
ENSG00000064995	286.903	242.117	224.547	259.629	300.787	236.301	276.506	257.156	TAF11
ENSG00000064999	230.246	260.565	300.497	239.743	249.95	326.508	207.992	297.566	ANKS1A
ENSG00000065000	3416.31	4875.78	4793.92	3878.97	4626.19	4349.52	3618.24	3572.63	AP3D1
ENSG00000065029	502.683	446.188	391.306	443.027	498.84	410.831	419.246	465.636	ZNF76
ENSG00000065054	2998.01	3666.35	2447.73	2671.42	4179.24	2483.62	2357.24	2496.25	SLC9A3R2
ENSG00000065057	184.438	92.2352	149.423	123.738	119.679	80.4013	130.505	138.68	NTHL1
ENSG00000065060	188.054	223.67	228.675	222.066	191.699	305.917	177.812	228.685	UHRF1BP1
ENSG00000065135	1150.02	1095.29	1069.9	1099.28	975.439	1032.47	1266.71	1327.11	GNAI3
ENSG00000065150	4837.57	4964.56	5366.02	5390.35	4457.79	6136.98	4771.57	5839.27	IPO5
ENSG00000065154	1516.49	1482.68	1512.39	1471.6	1632.09	1714.9	1721.03	1737.64	OAT
ENSG00000065183	267.615	254.8	312.054	251.896	297.61	298.073	281.4	329.71	WDR3
ENSG00000065243	485.806	368.941	416.073	461.809	410.934	538.297	464.107	540.027	PKN2
ENSG00000065268	1056	1129.88	1116.13	1006.48	1106.77	764.793	942.08	863.309	WDR18
ENSG00000065308	2814.78	4086.02	3663.75	4672.22	3996.02	3663.16	2392.31	2901.27	TRAM2
ENSG00000065320	608.764	822.047	1061.65	993.22	1243.39	787.345	849.911	1009.34	NTN1
ENSG00000065328	103.671	86.4705	107.32	75.1268	88.9651	115.699	75.8558	135.925	MCM10
ENSG00000065357	546.08	760.941	524.219	388.892	708.544	555.946	522.834	564.824	DGKA
ENSG00000065361	15.6712	13.8353	17.3364	20.9913	19.064	12.7466	16.3131	21.1235	ERBB3
ENSG00000065427	2561.63	2599.88	2689.61	2640.49	2933.73	2552.25	2372.74	2395.22	KARS
ENSG00000065457	317.04	328.588	371.493	268.468	276.427	299.054	274.875	315.016	ADAT1
ENSG00000065485	589.477	681.388	546.508	601.014	598.396	524.57	568.51	481.249	PDIA5
ENSG00000065491	255.56	253.647	231.977	248.581	224.531	228.457	211.254	220.419	TBC1D22B
ENSG00000065518	3070.34	2411.95	2530.28	2402.95	3627.45	2621.87	3521.99	2640.44	NDUFB4
ENSG00000065526	546.08	529.2	540.729	691.608	546.5	651.055	619.081	612.582	SPEN
ENSG00000065534	8239.41	7446.84	5713.57	4392.71	4562.64	9631.49	8092.91	10028.2	MYLK
ENSG00000065548	1379.06	855.482	1022.02	926.932	1048.52	954.03	1202.27	1254.55	ZC3H15
ENSG00000065559	537.641	627.2	577.879	581.128	561.328	730.476	597.874	664.013	MAP2K4
ENSG00000065600	185.643	146.423	137.865	122.633	129.211	161.783	176.997	195.622	TMEM206
ENSG00000065609	91.616	54.1882	87.5073	64.0787	76.2558	118.641	66.0679	97.3518	SNAP91
ENSG00000065613	1084.93	998.446	993.126	1042.94	934.134	1330.54	1042.41	1257.31	SLK
ENSG00000065615	224.218	247.882	294.718	271.782	276.427	289.249	275.691	334.302	CYB5R4
ENSG00000065618	84.3832	157.953	71.8221	80.6508	158.866	85.3039	76.6714	94.5966	COL17A1
ENSG00000065621	59.0682	55.3411	51.1835	53.0307	61.4283	28.4346	56.2801	46.8391	GSTO2
ENSG00000065665	55.4518	72.6352	62.7411	69.6028	50.8372	50.9862	58.727	71.6362	SEC61A2
ENSG00000065717	31.3423	104.918	26.4173	38.6682	84.7287	45.1032	29.3635	17.4499	TLE2
ENSG00000065802	669.038	660.635	718.221	701.552	584.628	660.86	604.399	674.115	ASB1
ENSG00000065809	315.834	323.976	284.812	467.333	288.078	340.235	313.211	346.242	FAM107B
ENSG00000065833	200.109	170.635	149.423	160.197	175.812	238.262	172.103	212.153	ME1
ENSG00000065882	130.191	112.988	161.806	166.826	142.98	186.296	141.108	133.17	TBC1D1
ENSG00000065883	608.764	621.435	641.445	605.434	613.224	801.072	612.556	703.505	CDK13
ENSG00000065911	790.791	623.741	744.638	804.299	707.485	954.03	837.676	928.516	MTHFD2
ENSG00000065923	1397.14	1880.45	1386.91	1628.48	1841.79	1430.56	1306.68	1382.21	SLC9A7
ENSG00000065970	248.328	334.353	302.148	290.564	264.777	297.093	299.345	285.627	FOXJ2
ENSG00000065978	15354.1	13882.6	15018.2	13999	14212.2	16587.2	16069.2	15064.7	YBX1
ENSG00000065989	33.7533	61.1058	50.358	44.1922	28.5959	34.3176	26.1009	27.5524	PDE4A
ENSG00000066027	581.038	441.576	473.861	506.001	529.554	703.021	542.41	641.053	PPP2R5A
ENSG00000066044	1184.98	1322.42	1530.55	1345.65	1485.93	1346.23	1312.39	1461.2	ELAVL1
ENSG00000066056	72.3284	63.4117	45.4048	95.0133	44.4826	38.2397	50.5705	54.1864	TIE1
ENSG00000066084	514.737	508.447	616.679	647.416	512.609	816.76	700.646	702.586	DIP2B
ENSG00000066117	1010.19	1182.92	1131.82	933.561	1277.29	1413.89	1018.75	1221.49	SMARCD1
ENSG00000066135	386.957	389.694	402.038	487.219	407.757	542.219	428.218	409.612	KDM4A
ENSG00000066136	373.697	411.6	416.073	417.617	461.771	443.188	410.274	382.06	NFYC
ENSG00000066185	13.2602	23.0588	15.6853	15.4673	32.8324	22.5516	15.4974	7.34731	ZMYND12
ENSG00000066248	268.821	76.0941	131.261	134.786	246.772	171.588	278.138	297.566	NGEF
ENSG00000066279	933.037	696.376	1116.96	1034.1	694.775	1260.93	854.805	1428.13	ASPM
ENSG00000066322	1881.74	1993.43	1974.69	1657.21	1675.51	1562.92	1748.76	1897.44	ELOVL1
ENSG00000066336	107.287	164.87	118.878	96.1181	98.4971	97.0699	132.136	98.2702	SPI1
ENSG00000066379	110.904	109.529	103.193	114.9	105.911	67.6548	94.6158	92.7597	ZNRD1
ENSG00000066422	206.136	169.482	192.351	191.131	202.29	249.048	218.595	291.137	ZBTB11
ENSG00000066427	308.601	228.282	239.407	275.097	230.886	274.541	312.395	286.545	ATXN3
ENSG00000066455	649.75	733.27	659.607	856.224	747.731	898.142	787.921	814.633	GOLGA5
ENSG00000066468	13.2602	10.3765	10.732	53.0307	18.0048	24.5126	19.5757	16.5314	FGFR2
ENSG00000066557	163.944	160.259	175.015	197.76	149.334	176.491	181.075	252.564	LRRC40
ENSG00000066583	159.123	107.223	113.099	139.206	134.507	197.081	169.656	211.235	ISOC1
ENSG00000066629	282.081	200.612	317.008	317.079	172.635	327.488	269.981	256.237	EML1
ENSG00000066651	67.5065	77.247	102.367	124.843	112.266	97.0699	90.5375	96.4334	TRMT11
ENSG00000066654	607.559	521.129	529.172	526.992	543.323	663.801	605.215	617.174	THUMPD1
ENSG00000066697	1310.35	1269.39	1036.88	1325.77	1053.81	1238.38	1149.26	1234.35	MSANTD3
ENSG00000066735	43.3971	55.3411	96.5883	109.376	57.1919	110.797	38.3357	58.7785	KIF26A
ENSG00000066739	359.231	333.2	305.45	330.337	256.304	478.486	371.122	410.531	ATG2B
ENSG00000066777	989.694	1059.55	1047.61	1149	989.208	1573.71	1009.78	1169.14	ARFGEF1
ENSG00000066827	95.2324	126.823	94.9372	112.69	101.674	117.66	83.1966	105.618	ZFAT
ENSG00000066855	432.765	340.117	412.77	446.342	396.107	462.798	444.531	470.228	MTFR1
ENSG00000066923	12.0547	13.8353	12.3831	4.41922	14.8275	13.7271	17.1287	10.1025	STAG3
ENSG00000066926	337.533	323.976	293.893	315.974	295.491	380.436	322.183	391.244	FECH
ENSG00000066933	382.135	427.741	283.161	335.861	390.811	385.338	327.893	347.16	MYO9A
ENSG00000067048	391.779	377.012	338.472	525.888	448.003	464.759	382.541	454.615	DDX3Y
ENSG00000067057	2818.4	2827.01	2636.78	2705.67	2052.55	2310.07	2746.3	2914.13	PFKP
ENSG00000067064	785.969	597.223	842.877	729.172	699.012	1184.45	730.01	1197.61	IDI1
ENSG00000067066	614.792	627.2	603.47	755.687	582.51	708.904	583.192	553.803	SP100
ENSG00000067082	2838.89	3119.86	3297.21	3167.48	1866.15	1947.28	2216.95	2506.35	KLF6
ENSG00000067113	149.479	153.341	158.504	176.769	195.935	131.388	185.153	136.844	PLPP1
ENSG00000067141	323.067	458.87	391.306	415.407	614.283	537.316	372.754	387.57	NEO1
ENSG00000067167	5677.78	6179.76	5483.24	6363.68	5993.5	7201.8	5919.2	6219.5	TRAM1
ENSG00000067177	69.9175	51.8823	64.3922	37.5634	36.0097	93.1479	72.5932	79.902	PHKA1
ENSG00000067182	3240.31	3102.56	3342.62	3389.54	2817.23	2492.44	3044.02	2805.75	TNFRSF1A
ENSG00000067191	112.109	146.423	99.0649	92.8037	81.5514	83.3428	90.5375	65.2073	CACNB1
ENSG00000067208	353.204	345.882	368.191	299.402	336.797	372.592	373.569	367.365	EVI5
ENSG00000067221	251.944	419.67	231.977	238.638	365.393	253.951	190.863	197.459	STOML1
ENSG00000067225	48121.3	76641.7	51733.4	53082.6	62029.9	51049.9	40443.4	39488.1	PKM
ENSG00000067248	855.886	645.647	755.37	726.962	723.371	714.787	722.669	821.98	DHX29
ENSG00000067334	642.518	547.647	578.704	550.193	646.056	490.252	542.41	716.362	DNTTIP2
ENSG00000067365	350.793	335.506	347.553	366.796	320.91	310.82	355.625	303.995	METTL22
ENSG00000067369	388.163	637.576	572.925	563.451	552.855	809.896	428.218	491.351	TP53BP1
ENSG00000067445	119.342	100.306	109.797	124.843	65.6647	100.011	119.085	133.17	TRO
ENSG00000067533	701.586	611.058	699.233	641.892	677.83	590.263	618.265	676.871	RRP15
ENSG00000067560	13166.2	16799.5	15590.3	14024.4	11641.7	15258.6	14483.6	13949.8	RHOA
ENSG00000067596	613.586	732.117	706.663	693.818	692.657	714.787	705.54	699.831	DHX8
ENSG00000067601	38.5752	47.2706	23.1151	33.1442	25.4186	33.3371	30.1792	22.0419	PMS2P4
ENSG00000067606	197.698	245.576	181.619	243.057	202.29	267.678	216.964	218.582	PRKCZ
ENSG00000067646	92.8215	80.7058	70.171	103.852	92.1425	154.92	117.454	134.088	ZFY
ENSG00000067704	2463.99	2454.61	2558.35	2455.98	2285.56	2878.76	2445.33	2810.34	IARS2
ENSG00000067715	49.4244	54.1882	51.1835	39.773	33.8915	40.2007	44.8609	56.9416	SYT1
ENSG00000067798	405.039	363.176	373.145	401.045	514.727	497.116	296.898	461.043	NAV3
ENSG00000067829	2212.04	2289.74	2091.1	2380.86	2026.07	1648.23	2135.38	2116.94	IDH3G
ENSG00000067836	401.423	478.47	379.749	335.861	395.048	318.664	344.206	295.729	ROGDI
ENSG00000067840	131.397	249.035	186.572	175.664	172.635	184.335	218.595	120.312	PDZD4
ENSG00000067900	1258.51	1185.22	1096.32	1112.54	1130.07	1142.29	1145.18	1234.35	ROCK1
ENSG00000067955	1191.01	1075.69	1320.87	1183.25	1197.85	1403.1	1190.04	1407.93	CBFB
ENSG00000068001	735.339	567.247	830.494	519.259	790.095	677.528	817.285	794.428	HYAL2
ENSG00000068024	96.4379	70.3294	70.9965	70.7076	85.7878	95.1089	97.8784	93.6782	HDAC4
ENSG00000068028	520.765	510.753	451.571	414.302	401.402	359.845	504.074	457.37	RASSF1
ENSG00000068078	195.287	199.459	267.475	185.607	200.172	214.73	189.232	269.095	FGFR3
ENSG00000068079	814.9	1210.59	841.226	868.377	874.824	738.32	682.702	636.46	IFI35
ENSG00000068097	298.958	261.717	299.671	298.298	274.309	294.151	290.373	319.608	HEATR6
ENSG00000068120	1931.17	1859.69	1786.47	1735.65	2066.32	1572.73	1766.71	1784.48	COASY
ENSG00000068137	538.847	747.105	644.748	618.691	706.426	471.622	495.917	527.169	PLEKHH3
ENSG00000068305	319.451	445.035	352.506	415.407	579.332	725.573	337.681	371.957	MEF2A
ENSG00000068308	1855.22	2090.28	2094.4	2016.27	1882.04	1870.8	1869.48	1800.09	OTUD5
ENSG00000068323	3405.46	4217.46	3525.89	3672.37	3694.17	3929.86	3504.05	3306.29	TFE3
ENSG00000068354	379.724	529.2	453.222	414.302	397.166	488.291	421.693	380.223	TBC1D25
ENSG00000068366	2245.8	2048.78	2371.78	2691.31	2225.19	3548.44	2279.75	2950.86	ACSL4
ENSG00000068383	213.369	216.753	226.198	220.961	260.541	301.015	261.009	253.482	INPP5A
ENSG00000068394	526.792	585.694	537.427	562.346	566.623	511.823	522.018	546.456	GPKOW
ENSG00000068400	952.324	894.682	760.323	882.74	867.41	740.281	846.648	746.67	GRIPAP1
ENSG00000068438	947.502	967.317	962.581	898.207	897.065	851.078	940.448	899.127	FTSJ1
ENSG00000068489	1445.36	1244.02	1474.42	1334.61	1416.03	1449.19	1190.85	1692.64	PRR11
ENSG00000068650	400.217	493.458	415.247	709.285	559.209	724.593	563.616	687.892	ATP11A
ENSG00000068654	515.943	581.082	700.059	530.307	577.214	567.712	495.917	614.419	POLR1A
ENSG00000068697	3428.37	3763.2	3594.41	4145.23	3728.06	3214.09	3853.15	3578.14	LAPTM4A
ENSG00000068724	620.819	822.047	722.348	647.416	655.588	758.91	585.639	475.738	TTC7A
ENSG00000068745	882.407	754.023	705.838	739.115	881.178	903.044	1145.99	878.003	IP6K2
ENSG00000068784	100.054	123.365	80.0775	108.271	116.502	98.0504	123.979	109.291	SRBD1
ENSG00000068796	347.176	327.435	419.375	391.101	242.536	532.414	388.251	472.064	KIF2A
ENSG00000068831	67.5065	100.306	59.439	46.4018	43.4235	43.1422	66.8836	25.7156	RASGRP2
ENSG00000068878	490.628	569.553	662.084	580.023	539.086	670.665	591.349	663.094	PSME4
ENSG00000068885	113.315	86.4705	106.495	148.044	115.443	128.446	129.689	106.536	IFT80
ENSG00000068903	537.641	620.282	663.735	630.844	567.682	546.141	503.258	495.025	SIRT2
ENSG00000068912	875.174	876.235	785.915	912.57	907.656	844.214	893.14	935.863	ERLEC1
ENSG00000068971	288.108	383.929	393.783	315.974	354.801	281.405	337.681	302.158	PPP2R5B
ENSG00000069011	1346.51	1203.67	1230.88	1226.33	1156.55	1027.57	1207.98	1055.26	PITX1
ENSG00000069020	124.164	172.941	146.946	170.14	140.861	130.407	130.505	110.21	MAST4
ENSG00000069248	646.134	719.435	671.165	735.801	556.032	811.857	606.03	711.77	NUP133
ENSG00000069275	10147.7	9598.23	9695.15	10071.4	10704.4	9019.66	8930.59	9934.48	NUCKS1
ENSG00000069329	2443.5	2047.62	2344.54	2201.88	2047.26	2252.22	2166.38	2228.99	VPS35
ENSG00000069345	1360.98	1457.32	1400.94	1434.04	1568.54	1488.41	1486.94	1468.54	DNAJA2
ENSG00000069399	231.451	344.729	313.706	386.682	148.275	249.048	197.388	191.03	BCL3
ENSG00000069424	141.04	118.753	145.295	129.262	177.93	176.491	127.242	133.17	KCNAB2
ENSG00000069431	143.451	56.4941	143.644	225.38	70.9603	115.699	185.153	159.804	ABCC9
ENSG00000069482	303.779	409.294	358.285	382.263	362.215	295.132	241.433	333.384	GAL
ENSG00000069493	38.5752	26.5176	23.9407	22.0961	34.9506	20.5906	33.4418	30.3076	CLEC2D
ENSG00000069509	360.437	288.235	279.858	266.258	323.028	253.951	349.1	333.384	FUNDC1
ENSG00000069535	8.43832	2.30588	4.95325	3.31442	10.5911	29.4151	27.7322	11.9394	MAOB
ENSG00000069667	110.904	94.5411	87.5073	128.157	68.8421	96.0894	90.5375	72.5547	RORA
ENSG00000069696	28.9314	23.0588	23.9407	19.8865	20.1231	12.7466	19.5757	13.7762	DRD4
ENSG00000069702	233.862	368.941	260.045	449.656	339.974	448.09	199.019	213.072	TGFBR3
ENSG00000069812	69.9175	89.9294	50.358	41.9826	62.4874	27.4541	57.0957	40.4102	HES2
ENSG00000069849	2870.23	2848.92	2485.7	2409.58	2991.98	2551.27	2486.93	2583.5	ATP1B3
ENSG00000069869	964.379	1411.2	979.092	1455.03	1534.65	2174.76	871.933	988.213	NEDD4
ENSG00000069943	190.465	231.741	167.585	225.38	257.363	275.522	174.55	184.601	PIGB
ENSG00000069956	513.532	608.753	515.138	646.311	593.101	899.122	543.225	554.722	MAPK6
ENSG00000069966	323.067	494.611	296.369	342.49	467.067	513.784	280.585	247.972	GNB5
ENSG00000069974	367.67	553.411	343.425	490.534	631.229	622.62	280.585	314.097	RAB27A
ENSG00000069998	324.272	235.2	300.497	285.04	198.053	192.179	267.534	278.279	HDHD5
ENSG00000070010	830.571	721.741	799.949	837.443	851.523	711.846	893.956	910.148	UFD1
ENSG00000070018	259.177	268.635	292.242	286.145	337.856	399.065	336.049	345.323	LRP6
ENSG00000070047	663.011	917.741	947.721	817.556	912.952	920.693	739.798	743.915	PHRF1
ENSG00000070061	495.45	458.87	509.359	437.503	444.826	649.094	480.42	626.358	ELP1
ENSG00000070081	1383.88	1147.18	1175.57	1174.41	1270.93	884.415	932.292	1196.69	NUCB2
ENSG00000070087	4509.68	2866.21	3907.29	3242.61	2821.47	3289.59	4277.29	3819.68	PFN2
ENSG00000070159	136.219	172.941	146.121	118.214	155.689	182.374	164.762	190.112	PTPN3
ENSG00000070182	13.2602	18.447	7.42987	3.31442	20.1231	13.7271	8.15653	4.59207	SPTB
ENSG00000070214	791.996	767.858	714.919	782.203	862.114	881.473	922.504	795.346	SLC44A1
ENSG00000070269	208.547	187.929	193.177	215.437	201.231	228.457	207.992	242.461	TMEM260
ENSG00000070366	459.286	532.658	608.424	692.713	572.978	621.64	502.442	522.577	SMG6
ENSG00000070367	881.201	805.905	977.441	1021.95	780.563	1287.4	991.019	1109.44	EXOC5
ENSG00000070371	118.136	147.576	130.435	101.642	135.566	105.894	124.795	128.578	CLTCL1
ENSG00000070404	4357.79	12313.4	5184.4	5130.72	6820.66	3966.14	4571.74	3920.71	FSTL3
ENSG00000070413	1089.75	1444.63	1312.61	1227.44	1347.19	1116.79	1026.91	1228.84	DGCR2
ENSG00000070423	555.723	740.188	642.271	654.045	800.686	598.107	586.455	589.621	RNF126
ENSG00000070444	472.546	493.458	627.411	574.499	461.771	415.734	498.364	479.412	MNT
ENSG00000070476	312.218	306.682	329.391	306.031	326.205	420.636	364.597	313.179	ZXDC
ENSG00000070495	923.393	661.788	785.915	755.687	639.702	758.91	724.3	754.936	JMJD6
ENSG00000070501	449.642	375.859	323.612	330.337	422.584	419.656	387.435	464.717	POLB
ENSG00000070540	670.243	953.482	754.544	889.369	927.779	949.128	927.398	673.197	WIPI1
ENSG00000070610	499.066	590.305	549.81	500.477	570.86	542.219	612.556	567.579	GBA2
ENSG00000070614	2039.66	2979.2	2767.21	2725.56	2519.62	2565	2376.81	2318.08	NDST1
ENSG00000070669	7.23284	104.918	22.2896	35.3538	63.5465	45.1032	17.9444	12.8578	ASNS
ENSG00000070718	368.875	360.87	310.403	269.573	318.792	396.124	295.267	320.526	AP3M2
ENSG00000070731	65.0956	34.5882	54.4857	37.5634	31.7733	40.2007	63.621	60.6153	ST6GALNAC2
ENSG00000070748	6.02737	17.2941	46.2303	19.8865	2.11822	10.7855	9.78784	13.7762	CHAT
ENSG00000070756	16498.1	17981.3	16704.8	17440.5	18053.6	21109.3	18727.4	15940.9	PABPC1
ENSG00000070761	480.984	491.153	506.057	450.761	638.643	529.472	513.046	517.067	CFAP20
ENSG00000070770	1620.16	1622.19	1635.4	1551.15	1818.49	1709.02	1610.92	1404.25	CSNK2A2
ENSG00000070778	276.054	351.647	288.114	351.328	221.354	409.851	293.635	282.871	PTPN21
ENSG00000070785	263.999	262.87	290.59	268.468	260.541	252.97	282.216	328.792	EIF2B3
ENSG00000070814	2098.73	2227.48	2338.76	1708.03	2163.76	1633.52	2074.21	2268.48	TCOF1
ENSG00000070831	3610.39	3805.86	3511.03	3705.52	3455.87	3998.5	3757.72	3823.35	CDC42
ENSG00000070882	729.312	901.599	916.351	724.753	793.272	1145.23	827.888	848.614	OSBPL3
ENSG00000070950	390.574	404.682	361.587	370.11	368.57	399.065	331.971	365.529	RAD18
ENSG00000070961	1197.04	853.176	944.419	1219.71	1119.48	1045.22	1071.77	1484.16	ATP2B1
ENSG00000071051	286.903	308.988	293.893	373.424	450.121	412.792	424.14	346.242	NCK2
ENSG00000071054	3542.89	2580.28	2971.95	3260.28	2949.62	2992.5	3871.91	3793.05	MAP4K4
ENSG00000071073	19.2876	16.1412	14.0342	19.8865	29.655	32.3566	22.8383	24.7972	MGAT4A
ENSG00000071082	13870.2	10224.3	10314.3	10641.5	10765.8	7461.64	11753.6	10868.5	RPL31
ENSG00000071127	6648.19	7783.5	7781.55	6666.4	5942.66	6925.3	6614.95	6952.39	WDR1
ENSG00000071189	280.875	219.059	312.88	311.555	285.959	356.903	322.999	384.815	SNX13
ENSG00000071205	530.408	570.705	594.39	563.451	470.244	658.899	531.806	546.456	ARHGAP10
ENSG00000071242	22.904	42.6588	34.6727	119.319	50.8372	61.7718	27.7322	25.7156	RPS6KA2
ENSG00000071243	139.835	210.988	175.015	138.101	173.694	213.75	157.421	176.335	ING3
ENSG00000071246	127.78	147.576	156.027	197.76	131.329	177.471	185.153	181.846	VASH1
ENSG00000071282	36.1642	138.353	43.7537	96.1181	102.734	31.3761	29.3635	21.1235	LMCD1
ENSG00000071462	1299.5	1531.1	1298.58	1215.29	1567.48	1127.58	1399.66	1413.44	BUD23
ENSG00000071537	1903.44	2029.18	2081.19	2430.57	1795.19	2466.95	1961.65	2298.79	SEL1L
ENSG00000071539	582.244	510.753	706.663	551.298	607.928	803.033	538.331	674.115	TRIP13
ENSG00000071553	2523.06	2822.4	2462.59	2455.98	2415.83	2057.1	2327.87	2465.94	ATP6AP1
ENSG00000071564	1383.88	1769.76	1953.23	1800.83	1979.47	2040.43	1557.9	1554.87	TCF3
ENSG00000071575	63.8901	84.1646	41.277	112.69	45.5417	49.0252	79.934	49.5943	TRIB2
ENSG00000071626	2142.13	2601.03	2750.7	2320.09	2548.22	2437.53	2246.31	2386.96	DAZAP1
ENSG00000071655	2016.76	2944.61	2467.54	2065.99	2616	2050.23	1912.71	2054.49	MBD3
ENSG00000071794	358.026	206.376	391.306	253.001	266.895	414.753	400.486	388.489	HLTF
ENSG00000071859	4396.36	4279.71	3684.39	3357.5	4087.1	2961.12	3698.99	3312.72	FAM50A
ENSG00000071889	1471.88	1595.67	1306.83	1360.02	1268.81	1054.04	1304.23	1160.87	FAM3A
ENSG00000071894	1230.79	1288.99	1254.82	1157.84	1266.69	1195.23	1224.3	1214.14	CPSF1
ENSG00000071967	1529.75	1823.95	1573.48	1662.73	1925.46	2560.1	1554.64	1500.69	CYBRD1
ENSG00000071994	1070.46	1021.51	854.435	999.849	1158.66	1124.64	1097.87	1080.05	PDCD2
ENSG00000072042	1317.58	848.564	1093.02	991.011	1047.46	1004.04	989.388	1294.04	RDH11
ENSG00000072062	1178.95	1472.3	1639.52	1458.34	1735.88	1638.42	1398.85	1349.15	PRKACA
ENSG00000072071	253.15	484.235	353.332	370.11	467.067	271.6	318.105	253.482	ADGRL1
ENSG00000072110	9836.67	11937.5	12284.9	11508.8	10237.3	10082.5	10972.2	11315.8	ACTN1
ENSG00000072121	386.957	450.8	459.826	441.922	364.333	519.667	419.246	407.776	ZFYVE26
ENSG00000072133	335.122	205.223	262.522	451.866	193.817	432.402	334.418	399.51	RPS6KA6
ENSG00000072134	708.819	579.929	676.118	650.731	658.766	912.849	698.199	725.547	EPN2
ENSG00000072135	155.506	187.929	191.526	186.712	167.339	186.296	185.969	187.356	PTPN18
ENSG00000072163	521.97	986.917	512.661	398.835	505.195	422.597	504.074	383.897	LIMS2
ENSG00000072195	1078.9	933.882	906.444	859.539	745.613	957.953	907.007	932.19	SPEG
ENSG00000072201	24.1095	41.5059	34.6727	33.1442	28.5959	46.0837	38.3357	39.4918	LNX1
ENSG00000072210	663.011	432.353	550.636	423.141	521.081	641.25	623.159	658.502	ALDH3A2
ENSG00000072274	693.147	594.917	893.235	532.516	576.155	962.855	667.204	862.39	TFRC
ENSG00000072310	1382.68	1785.9	1741.89	1909.1	2266.49	1682.55	1204.72	1381.29	SREBF1
ENSG00000072364	1934.79	1565.69	1854.99	2016.27	1721.05	2800.32	1998.35	2255.62	AFF4
ENSG00000072401	242.3	220.212	274.08	323.708	243.595	329.449	363.781	326.037	UBE2D1
ENSG00000072415	664.216	759.788	688.501	747.954	577.214	959.914	628.053	856.88	MPP5
ENSG00000072422	86.7941	189.082	79.2519	134.786	159.925	125.505	122.348	99.1886	RHOBTB1
ENSG00000072501	1487.55	1412.35	1693.18	1518	1466.87	1764.91	1478.78	2038.88	SMC1A
ENSG00000072506	978.845	982.305	1051.74	852.91	933.075	654.977	1120.71	901.882	HSD17B10
ENSG00000072518	599.121	822.047	831.32	765.63	894.947	797.15	731.641	684.218	MARK2
ENSG00000072571	640.107	259.412	496.15	472.857	438.471	622.62	596.243	897.29	HMMR
ENSG00000072609	298.958	364.329	378.098	398.835	370.688	337.293	388.251	400.428	CHFR
ENSG00000072657	12.0547	14.9882	18.9874	11.0481	11.6502	8.82454	10.6035	28.4708	TRHDE
ENSG00000072682	1459.83	1291.29	1371.22	1326.87	963.789	855.98	1324.62	1337.21	P4HA2
ENSG00000072736	97.6434	156.8	119.703	134.786	119.679	164.725	95.4314	100.107	NFATC3
ENSG00000072756	341.149	275.553	248.488	348.014	300.787	343.176	401.301	357.263	TRNT1
ENSG00000072778	8683.03	9961.41	7663.5	7593.33	9473.73	5546.71	7663.88	6663.09	ACADVL
ENSG00000072786	1178.95	1546.09	1397.64	1334.61	1216.92	1174.64	1063.61	1084.65	STK10
ENSG00000072803	643.723	554.564	640.62	720.333	620.638	846.175	676.177	688.81	FBXW11
ENSG00000072818	207.342	91.0823	133.738	136.996	133.448	47.0642	131.32	98.2702	ACAP1
ENSG00000072832	442.409	568.4	515.138	475.066	525.318	445.149	473.895	411.449	CRMP1
ENSG00000072840	1129.53	1080.31	1307.66	1480.44	1129.01	1477.62	1130.5	1148.02	EVC
ENSG00000072849	1068.05	1014.59	995.602	1055.09	1085.59	808.916	1121.52	1150.77	DERL2
ENSG00000072864	450.847	438.117	473.861	475.066	426.821	510.843	382.541	502.372	NDE1
ENSG00000072958	1344.1	2074.14	2035.78	1747.8	1990.07	1610.97	1499.17	1464.87	AP1M1
ENSG00000073008	596.71	778.235	884.98	739.115	796.45	675.567	553.829	643.808	PVR
ENSG00000073050	695.558	597.223	700.059	826.395	919.306	773.618	724.3	753.099	XRCC1
ENSG00000073060	737.75	453.106	681.897	510.42	406.698	506.921	513.046	682.381	SCARB1
ENSG00000073111	546.08	545.341	717.395	699.342	623.815	698.119	520.387	671.36	MCM2
ENSG00000073150	456.875	818.588	442.49	511.525	584.628	401.026	495.102	369.202	PANX2
ENSG00000073169	330.3	499.223	272.429	409.883	453.299	315.722	260.193	245.216	SELENOO
ENSG00000073282	8.43832	10.3765	40.4515	32.0394	6.35465	8.82454	23.6539	10.1025	TP63
ENSG00000073331	83.1777	71.4823	92.4606	101.642	76.2558	103.933	99.5097	73.4731	ALPK1
ENSG00000073350	45.808	106.071	39.626	33.1442	58.251	58.8302	54.6488	35.8181	LLGL2
ENSG00000073417	186.848	242.117	180.793	218.752	291.255	323.566	180.259	202.969	PDE8A
ENSG00000073464	30.1368	36.8941	28.0684	39.773	36.0097	43.1422	25.2853	51.4311	CLCN4
ENSG00000073536	517.148	476.164	549.81	573.394	432.116	394.163	460.029	415.123	NLE1
ENSG00000073578	1691.28	1529.95	1831.88	1620.75	1602.43	1687.45	1875.19	1768.86	SDHA
ENSG00000073584	1523.72	1325.88	1322.52	1393.16	1535.71	1560.96	1563.61	1533.75	SMARCE1
ENSG00000073605	22.904	33.4353	41.277	25.4105	37.0688	24.5126	48.1235	28.4708	GSDMB
ENSG00000073614	1013.8	895.835	875.073	1027.47	1080.29	760.871	937.186	878.922	KDM5A
ENSG00000073670	61.4792	62.2588	47.8814	60.7643	41.3052	60.7913	57.9114	64.2889	ADAM11
ENSG00000073711	536.436	529.2	563.845	591.071	580.392	729.495	548.119	509.719	PPP2R3A
ENSG00000073712	1315.17	1423.88	1233.36	1925.68	1089.82	1751.18	1317.28	1433.64	FERMT2
ENSG00000073756	8.43832	6.91764	7.42987	40.8778	12.7093	6.86353	5.70957	6.42889	PTGS2
ENSG00000073792	1590.02	1144.87	1476.07	1559.99	1599.25	1635.48	1170.46	1524.57	IGF2BP2
ENSG00000073803	210.958	152.188	137.04	148.044	208.644	150.017	176.997	189.193	MAP3K13
ENSG00000073849	24.1095	14.9882	3.30216	6.62883	11.6502	11.766	17.9444	26.634	ST6GAL1
ENSG00000073910	2.41095	96.847	26.4173	46.4018	171.576	91.1869	34.2574	14.6946	FRY
ENSG00000073921	2567.66	2703.65	2446.08	2808.42	2612.82	2887.58	2570.94	2759.83	PICALM
ENSG00000073969	869.147	826.658	1085.59	837.443	823.987	1141.31	951.868	960.66	NSF
ENSG00000074047	28.9314	12.6823	30.545	16.5721	25.4186	28.4346	37.5201	33.0629	GLI2
ENSG00000074054	307.396	259.412	335.17	320.394	310.319	399.065	313.211	354.508	CLASP1
ENSG00000074071	1706.95	1541.48	1616.41	1420.78	1676.57	1314.86	1353.17	1303.23	MRPS34
ENSG00000074181	765.476	1174.85	916.351	1207.55	920.365	618.698	1056.27	788.917	NOTCH3
ENSG00000074201	993.31	994.988	1083.11	1063.93	1093	1117.77	943.711	1047.91	CLNS1A
ENSG00000074211	461.696	148.729	331.867	227.59	134.507	239.243	447.794	456.451	PPP2R2C
ENSG00000074219	54.2463	116.447	79.2519	100.537	156.748	69.6158	71.7775	48.6759	TEAD2
ENSG00000074266	207.342	178.706	224.547	286.145	212.881	209.828	252.037	251.645	EED
ENSG00000074319	824.544	968.47	854.435	863.958	999.799	916.771	853.989	814.633	TSG101
ENSG00000074356	747.394	711.364	742.987	799.879	753.026	871.668	829.519	936.782	NCBP3
ENSG00000074410	283.286	191.388	126.308	239.743	181.108	202.964	98.6941	102.862	CA12
ENSG00000074416	9090.48	14124.7	10997	7162.46	14164.5	13381.9	6136.98	6204.8	MGLL
ENSG00000074527	347.176	546.494	354.157	499.372	605.81	502.018	446.978	412.368	NTN4
ENSG00000074582	272.437	175.247	233.628	187.817	200.172	197.081	207.176	250.727	BCS1L
ENSG00000074590	180.821	321.67	174.189	207.703	165.221	189.237	184.338	173.58	NUAK1
ENSG00000074603	444.82	750.564	411.945	458.494	722.312	747.144	452.688	515.23	DPP8
ENSG00000074621	90.4105	156.8	73.4731	97.2229	158.866	148.056	84.0123	108.373	SLC24A1
ENSG00000074657	388.163	449.647	406.166	553.508	485.072	646.152	499.18	507.883	ZNF532
ENSG00000074660	10.8493	21.9059	14.0342	7.73364	12.7093	12.7466	13.0505	10.1025	SCARF1
ENSG00000074695	1586.4	1470	1537.16	1752.22	1484.87	1890.41	1623.15	1809.27	LMAN1
ENSG00000074696	706.408	514.211	428.456	539.145	614.283	652.035	555.46	710.852	HACD3
ENSG00000074755	842.626	984.611	1027.8	1017.53	969.084	1048.16	956.761	1024.95	ZZEF1
ENSG00000074800	42623.1	40823.3	39588.8	41612.5	34359.6	32266.4	34811.3	38835.1	ENO1
ENSG00000074842	3340.37	3824.3	3422.69	3336.51	3703.7	2564.02	2962.45	2831.47	MYDGF
ENSG00000074855	60.2737	89.9294	70.171	71.8124	66.7238	74.5183	61.9897	94.5966	ANO8
ENSG00000074935	96.4379	84.1646	71.8221	74.022	88.9651	91.1869	99.5097	104.699	TUBE1
ENSG00000074964	302.574	436.964	341.774	318.184	374.924	387.299	333.602	257.156	ARHGEF10L
ENSG00000075073	9.64379	13.8353	16.5108	13.2577	7.41376	20.5906	4.07827	11.021	TACR2
ENSG00000075089	207.342	171.788	182.445	229.8	186.403	185.315	194.126	303.995	ACTR6
ENSG00000075131	51.8354	79.5529	51.1835	60.7643	94.2607	72.5573	63.621	77.1467	TIPIN
ENSG00000075142	1099.39	1021.51	1289.5	908.15	1062.29	1020.7	1109.29	1086.48	SRI
ENSG00000075151	1115.06	1042.26	1045.13	1046.25	1247.63	1354.08	1145.18	1288.53	EIF4G3
ENSG00000075188	534.025	409.294	499.452	445.237	481.894	400.046	471.448	665.85	NUP37
ENSG00000075213	33.7533	25.3647	101.542	306.031	326.205	104.914	48.1235	74.3915	SEMA3A
ENSG00000075218	497.861	368.941	629.888	489.429	531.673	707.924	446.978	659.421	GTSE1
ENSG00000075223	4367.43	3484.19	3533.32	4656.76	3808.55	4985.86	5044	4924.53	SEMA3C
ENSG00000075234	153.095	103.765	85.8563	136.996	135.566	123.544	128.873	120.312	TTC38
ENSG00000075239	446.025	375.859	479.639	489.429	341.033	432.402	422.508	560.232	ACAT1
ENSG00000075240	231.451	269.788	256.743	261.839	296.55	304.937	248.774	258.074	GRAMD4
ENSG00000075275	650.956	604.141	779.311	815.347	570.86	789.306	777.318	918.413	CELSR1
ENSG00000075292	664.216	576.47	530.823	536.936	616.401	729.495	670.467	791.672	ZNF638
ENSG00000075303	189.259	118.753	236.93	175.664	188.521	236.301	192.494	242.461	SLC25A40
ENSG00000075336	356.82	311.294	381.4	302.717	354.801	275.522	384.988	427.062	TIMM21
ENSG00000075340	407.45	228.282	391.306	190.027	282.782	400.046	370.307	378.386	ADD2
ENSG00000075391	1518.9	1257.86	1750.97	1451.71	1315.41	1491.35	1485.3	1704.58	RASAL2
ENSG00000075399	424.327	366.635	359.11	395.52	361.156	287.288	347.468	337.058	VPS9D1
ENSG00000075407	271.232	202.918	186.572	219.856	192.758	255.912	254.484	241.543	ZNF37A
ENSG00000075413	1039.12	833.576	918.827	1069.45	855.76	1177.59	1071.77	1078.22	MARK3
ENSG00000075415	8115.25	8153.59	8554.26	7342.54	7025.07	8043.08	7955.07	8252.86	SLC25A3
ENSG00000075420	952.324	1092.99	1024.5	1295.94	1284.7	1531.55	1106.84	1239.86	FNDC3B
ENSG00000075426	1814.24	1414.66	2357.75	2894.59	1016.74	1658.03	1526.09	1712.84	FOSL2
ENSG00000075539	301.368	232.894	287.288	286.145	237.24	359.845	303.423	357.263	FRYL
ENSG00000075568	487.011	607.6	655.48	524.783	567.682	689.294	515.493	642.889	TMEM131
ENSG00000075618	7030.32	7389.2	8309.9	7286.19	6311.23	5196.67	8176.11	7428.13	FSCN1
ENSG00000075624	109867	131620	119789	104124	125924	85758.8	123313	110638	ACTB
ENSG00000075643	202.52	142.965	170.061	225.38	185.344	271.6	142.739	202.051	MOCOS
ENSG00000075651	67.5065	61.1058	70.171	90.5941	74.1376	78.4403	71.7775	95.515	PLD1
ENSG00000075702	168.766	294	312.88	190.027	237.24	226.496	176.181	256.237	WDR62
ENSG00000075711	1256.1	1133.34	1115.31	1395.37	1496.52	1716.86	1189.22	1534.67	DLG1
ENSG00000075785	11059	11396.8	11636	9513.48	11517.8	11512.1	11769.9	10411.1	RAB7A
ENSG00000075790	928.215	1256.71	1132.64	878.321	1332.36	1150.13	1019.57	1099.34	BCAP29
ENSG00000075826	24.1095	23.0588	22.2896	30.9346	33.8915	35.2981	39.1514	33.9813	SEC31B
ENSG00000075856	687.12	729.811	753.719	700.447	678.889	735.378	637.841	727.383	SART3
ENSG00000075914	637.696	552.258	544.857	459.599	568.741	451.032	534.253	552.885	EXOSC7
ENSG00000075945	353.204	222.517	280.684	261.839	243.595	203.945	286.294	296.648	KIFAP3
ENSG00000075975	584.655	599.529	518.44	526.992	675.711	797.15	700.646	611.663	MKRN2
ENSG00000076003	567.778	538.423	686.85	641.892	574.037	689.294	628.053	717.281	MCM6
ENSG00000076043	975.228	985.764	915.525	931.351	809.159	754.988	998.36	890.861	REXO2
ENSG00000076053	331.505	327.435	292.242	429.769	221.354	278.463	317.289	315.934	RBM7
ENSG00000076067	1075.28	1217.51	991.475	1151.21	1331.3	1113.85	1090.53	1116.79	RBMS2
ENSG00000076108	1086.13	1106.82	1122.74	1167.78	1160.78	1353.1	1083.19	1178.32	BAZ2A
ENSG00000076201	913.749	1118.35	1178.05	999.849	1009.33	888.337	1026.91	1098.42	PTPN23
ENSG00000076242	672.654	660.635	725.651	744.639	635.465	827.545	650.891	777.896	MLH1
ENSG00000076248	424.327	509.6	634.841	488.324	571.919	566.731	411.905	539.109	UNG
ENSG00000076258	12.0547	20.7529	12.3831	15.4673	14.8275	5.88302	8.97219	12.8578	FMO4
ENSG00000076321	174.794	151.035	162.632	174.559	201.231	197.081	187.6	189.193	KLHL20
ENSG00000076344	49.4244	84.1646	42.9281	54.1355	34.9506	45.1032	48.9392	51.4311	RGS11
ENSG00000076351	75.9449	56.4941	68.5199	51.9259	72.0194	74.5183	70.1462	67.9626	SLC46A1
ENSG00000076356	204.931	462.329	305.45	239.743	366.452	254.931	429.849	230.522	PLXNA2
ENSG00000076382	694.353	588	814.809	612.062	767.854	841.273	774.055	1016.68	SPAG5
ENSG00000076513	2183.11	2179.06	2716.86	2548.79	1810.02	2604.22	2104.39	2569.72	ANKRD13A
ENSG00000076554	343.56	296.306	354.157	313.765	385.516	450.051	333.602	354.508	TPD52
ENSG00000076555	59.0682	40.3529	41.277	26.5153	55.0737	42.1617	43.2296	37.6549	ACACB
ENSG00000076604	1087.34	1337.41	1136.77	935.771	1172.43	944.225	1118.26	930.353	TRAF4
ENSG00000076641	57.8627	27.6706	37.1493	72.9172	29.655	50.0057	44.8609	48.6759	PAG1
ENSG00000076650	194.081	197.153	205.56	175.664	203.349	221.594	205.545	194.704	GPATCH1
ENSG00000076685	248.328	333.2	361.587	354.643	317.733	619.679	346.653	378.386	NT5C2
ENSG00000076706	449.642	291.694	210.513	300.507	271.132	240.224	562.801	597.887	MCAM
ENSG00000076716	261.588	302.07	266.65	351.328	439.53	316.703	259.378	282.871	GPC4
ENSG00000076770	19.2876	13.8353	26.4173	18.7817	14.8275	38.2397	11.4191	22.0419	MBNL3
ENSG00000076826	2.41095	14.9882	1.65108	20.9913	9.53198	18.6296	11.4191	8.26572	CAMSAP3
ENSG00000076864	21.6985	23.0588	29.7195	24.3057	23.3004	20.5906	27.7322	20.2051	RAP1GAP
ENSG00000076924	1002.95	1022.66	1061.65	1118.06	978.616	743.222	884.984	851.369	XAB2
ENSG00000076928	978.845	1049.18	1203.64	1160.05	1265.63	1182.49	1013.86	966.171	ARHGEF1
ENSG00000076944	614.792	1203.67	947.721	788.831	656.647	599.088	548.935	438.083	STXBP2
ENSG00000076984	659.394	795.529	743.812	720.333	845.169	711.846	674.545	641.053	MAP2K7
ENSG00000077044	178.41	197.153	170.061	192.236	178.989	205.906	181.891	169.906	DGKD
ENSG00000077063	6.02737	4.61176	15.6853	4.41922	5.29554	7.84403	22.0226	13.7762	CTTNBP2
ENSG00000077097	3066.73	3447.29	2860.5	3630.39	3017.4	4387.76	3268.32	4022.65	TOP2B
ENSG00000077147	3116.15	3224.77	3175.86	3256.97	2949.62	3515.11	3265.06	3962.95	TM9SF3
ENSG00000077150	1757.58	1893.13	1731.99	1883.69	2120.34	1655.09	1872.74	1968.16	NFKB2
ENSG00000077152	505.094	395.459	500.278	394.416	424.703	421.617	535.069	755.854	UBE2T
ENSG00000077157	100.054	159.106	95.7628	87.2797	119.679	136.29	109.298	104.699	PPP1R12B
ENSG00000077232	1139.17	940.799	1042.66	1048.46	961.671	1133.46	1142.73	1198.53	DNAJC10
ENSG00000077235	1336.87	1391.6	1753.45	1361.12	1320.71	1196.21	1274.87	1433.64	GTF3C1
ENSG00000077238	808.873	794.376	905.618	1115.85	829.282	767.735	765.899	842.185	IL4R
ENSG00000077254	383.341	373.553	425.979	398.835	366.452	532.414	400.486	442.675	USP33
ENSG00000077264	242.3	138.353	153.551	182.293	133.448	264.736	211.254	267.258	PAK3
ENSG00000077312	1145.2	935.035	1165.66	1058.4	1043.22	841.273	1061.17	1058.01	SNRPA
ENSG00000077348	216.985	116.447	198.955	166.826	178.989	129.427	212.07	189.193	EXOSC5
ENSG00000077380	1539.39	1413.5	1464.51	1472.71	1416.03	1361.92	1616.63	1514.46	DYNC1I2
ENSG00000077454	77.1503	126.823	108.146	88.3845	111.206	108.836	99.5097	92.7597	LRCH4
ENSG00000077458	127.78	124.518	110.622	135.891	124.975	124.524	160.684	137.762	FAM76B
ENSG00000077463	476.162	530.353	536.602	487.219	464.949	333.371	444.531	351.752	SIRT6
ENSG00000077514	342.355	388.541	433.409	392.206	369.629	381.416	322.999	322.363	POLD3
ENSG00000077549	3108.92	3381.57	3113.12	3027.17	3642.27	3125.85	3513.02	3057.4	CAPZB
ENSG00000077585	300.163	235.2	252.616	317.079	213.94	270.619	306.686	280.116	GPR137B
ENSG00000077616	22.904	6.91764	14.8597	16.5721	16.9457	20.5906	35.0731	24.7972	NAALAD2
ENSG00000077684	389.368	415.059	372.319	356.852	321.969	334.352	309.133	411.449	JADE1
ENSG00000077713	353.204	382.776	335.17	328.127	318.792	429.461	420.061	350.834	SLC25A43
ENSG00000077721	1609.31	1689.06	1593.29	1540.1	1728.47	1914.92	1752.02	1779.89	UBE2A
ENSG00000077782	4715.81	6487.6	6470.59	6202.38	5821.92	6002.65	4867.82	5705.18	FGFR1
ENSG00000077942	215.78	141.812	245.186	198.865	175.812	126.485	238.986	228.685	FBLN1
ENSG00000078018	32.5478	20.7529	21.4641	33.1442	32.8324	32.3566	31.8105	31.2261	MAP2
ENSG00000078043	253.15	237.506	222.071	187.817	248.891	240.224	225.936	247.053	PIAS2
ENSG00000078053	59.0682	42.6588	60.2645	142.52	51.8963	103.933	91.3532	106.536	AMPH
ENSG00000078061	1001.75	1435.41	1292.8	1278.26	1026.28	1293.28	1147.62	1139.75	ARAF
ENSG00000078070	227.835	166.023	217.117	214.332	160.985	215.711	199.019	258.074	MCCC1
ENSG00000078081	18.0821	18.447	13.2087	15.4673	45.5417	33.3371	4.89392	11.021	LAMP3
ENSG00000078098	407.45	568.4	392.958	351.328	558.15	455.934	482.051	287.463	FAP
ENSG00000078124	231.451	295.153	245.186	243.057	298.669	286.307	230.83	259.911	ACER3
ENSG00000078140	963.174	930.423	889.108	967.81	1018.86	1180.53	1030.99	1113.12	UBE2K
ENSG00000078142	380.93	363.176	405.341	426.455	403.52	455.934	477.157	386.652	PIK3C3
ENSG00000078177	61.4792	40.3529	58.6134	54.1355	47.6599	62.7523	75.8558	51.4311	N4BP2
ENSG00000078237	245.917	308.988	373.145	220.961	262.659	303.956	320.552	277.361	TIGAR
ENSG00000078246	429.149	451.953	457.35	483.905	441.648	535.355	493.47	508.801	TULP3
ENSG00000078269	669.038	644.494	632.364	681.665	669.357	744.203	669.651	860.553	SYNJ2
ENSG00000078304	1297.09	1192.14	1377.83	1313.61	1118.42	1535.47	1384.16	1441.91	PPP2R5C
ENSG00000078319	160.328	221.365	201.432	178.979	224.531	192.179	180.259	171.743	PMS2P1
ENSG00000078369	4122.72	4853.88	4702.28	4611.46	4240.67	5308.45	4172.88	4227.46	GNB1
ENSG00000078403	186.848	189.082	201.432	177.874	177.93	208.847	168.025	222.256	MLLT10
ENSG00000078487	57.8627	70.3294	42.9281	35.3538	59.3101	46.0837	50.5705	41.3286	ZCWPW1
ENSG00000078596	24.1095	357.412	84.2052	119.319	203.349	185.315	23.6539	22.9603	ITM2A
ENSG00000078618	2961.85	2758.99	3140.36	2906.74	2556.69	3234.68	2846.63	3179.55	NRDC
ENSG00000078668	2815.99	2529.55	2556.7	2246.07	2709.2	2392.43	2650.87	2850.75	VDAC3
ENSG00000078674	2108.37	1728.26	2065.5	2007.43	2032.43	2651.28	2112.54	2492.57	PCM1
ENSG00000078687	313.423	349.341	317.833	371.215	314.555	331.41	324.63	335.221	TNRC6C
ENSG00000078699	343.56	342.423	340.948	349.119	320.91	410.831	382.541	406.857	CBFA2T2
ENSG00000078747	710.024	636.423	644.748	682.77	699.012	709.885	813.206	763.201	ITCH
ENSG00000078804	396.601	617.976	617.505	586.652	619.579	757.93	603.584	594.213	TP53INP2
ENSG00000078808	3093.25	3092.19	3256.76	2950.94	3151.91	2589.51	2956.74	2712.07	SDF4
ENSG00000078900	71.123	66.8705	92.4606	56.3451	98.4971	93.1479	73.4088	79.902	TP73
ENSG00000078902	1049.97	1332.8	1364.62	1362.23	1316.47	1378.59	1058.72	994.642	TOLLIP
ENSG00000078967	203.725	268.635	217.943	180.083	235.122	227.477	241.433	162.559	UBE2D4
ENSG00000079134	226.629	169.482	202.258	183.398	172.635	182.374	213.701	255.319	THOC1
ENSG00000079150	30.1368	13.8353	15.6853	15.4673	18.0048	11.766	18.76	14.6946	FKBP7
ENSG00000079156	145.862	83.0117	158.504	143.625	116.502	119.621	151.712	180.009	OSBPL6
ENSG00000079215	3.61642	8.07058	5.77879	5.52403	51.8963	17.6491	5.70957	4.59207	SLC1A3
ENSG00000079246	2948.59	2369.29	2553.4	2630.54	2711.32	2630.69	2840.11	3122.61	XRCC5
ENSG00000079257	186.848	290.541	210.513	269.573	372.806	211.789	348.284	161.641	LXN
ENSG00000079263	55.4518	23.0588	20.6385	29.8298	24.3595	30.3956	54.6488	39.4918	SP140
ENSG00000079277	200.109	221.365	200.606	174.559	205.467	224.535	187.6	182.764	MKNK1
ENSG00000079308	470.135	748.258	643.096	918.094	503.077	567.712	623.159	574.927	TNS1
ENSG00000079313	473.751	809.364	730.604	607.643	782.681	717.729	581.561	599.724	REXO1
ENSG00000079332	2046.89	2271.29	1952.4	2020.69	2156.35	1912.96	1795.25	1838.66	SAR1A
ENSG00000079335	24.1095	14.9882	23.9407	23.2009	27.5368	33.3371	40.7827	34.8997	CDC14A
ENSG00000079337	89.2051	141.812	128.784	90.5941	96.3789	86.2844	84.0123	64.2889	RAPGEF3
ENSG00000079387	259.177	288.235	305.45	279.516	265.836	342.196	307.501	340.731	SENP1
ENSG00000079432	1206.68	1859.69	1709.7	1631.8	1633.15	1585.48	1224.3	1312.41	CIC
ENSG00000079459	3582.67	2298.96	4320.88	3191.78	2980.33	5015.28	3000.79	4455.22	FDFT1
ENSG00000079462	330.3	306.682	369.017	321.498	319.851	252.97	283.847	348.997	PAFAH1B3
ENSG00000079482	285.697	190.235	293.893	237.533	211.822	372.592	221.858	292.974	OPHN1
ENSG00000079616	941.475	777.082	1109.53	854.015	854.701	861.863	822.994	892.698	KIF22
ENSG00000079691	171.177	304.376	206.385	196.655	254.186	275.522	217.779	183.683	CARMIL1
ENSG00000079739	945.092	1344.33	1020.37	1179.93	839.873	970.699	854.805	844.022	PGM1
ENSG00000079785	1330.84	1105.67	1175.57	1130.22	1264.58	1182.49	1230.82	1340.88	DDX1
ENSG00000079805	1702.13	2379.67	2442.78	2236.13	2535.51	2583.63	1854.8	1972.75	DNM2
ENSG00000079819	1152.43	1412.35	2058.07	1523.53	1300.59	1853.15	1123.97	1525.48	EPB41L2
ENSG00000079841	333.916	350.494	421.851	372.32	356.92	814.799	253.668	381.142	RIMS1
ENSG00000079931	499.066	213.294	733.906	705.971	360.097	409.851	295.267	583.192	MOXD1
ENSG00000079950	819.722	756.329	772.706	742.429	616.401	768.715	768.345	800.856	STX7
ENSG00000079974	244.711	333.2	271.603	317.079	317.733	318.664	232.461	228.685	RABL2B
ENSG00000079999	1521.31	1841.25	1727.86	1727.92	1843.91	1609.01	1481.23	1363.84	KEAP1
ENSG00000080031	157.917	268.635	203.083	257.42	257.363	246.107	141.924	138.68	PTPRH
ENSG00000080189	1231.99	1947.32	1285.37	1283.78	1698.81	1149.15	1358.06	1227.92	SLC35C2
ENSG00000080200	39.7806	58.8	42.9281	85.07	64.6056	174.53	41.5983	72.5547	CRYBG3
ENSG00000080224	19.2876	24.2117	18.1619	37.5634	30.7142	29.4151	14.6818	18.3683	EPHA6
ENSG00000080298	74.7394	46.1176	64.3922	58.5547	45.5417	94.1284	101.141	99.1886	RFX3
ENSG00000080345	562.956	365.482	472.209	434.189	380.22	500.057	510.599	576.764	RIF1
ENSG00000080371	1165.69	1147.18	1250.69	1247.33	1359.9	1339.37	1292.81	1548.44	RAB21
ENSG00000080493	3.61642	32.2823	9.90649	5.52403	30.7142	13.7271	13.8661	12.8578	SLC4A4
ENSG00000080503	1187.39	1011.13	1173.09	1240.7	1001.92	1240.34	1168.83	1240.78	SMARCA2
ENSG00000080546	337.533	364.329	382.225	338.071	349.506	385.338	361.334	358.181	SESN1
ENSG00000080561	83.1777	101.459	101.542	143.625	110.147	189.237	116.638	105.618	MID2
ENSG00000080573	97.6434	378.164	373.97	644.102	206.526	117.66	234.093	131.333	COL5A3
ENSG00000080603	50.6299	64.5647	75.1242	60.7643	82.6105	80.4013	44.0453	51.4311	SRCAP
ENSG00000080608	397.806	364.329	415.247	341.385	269.014	335.332	329.524	412.368	PUM3
ENSG00000080802	327.889	418.517	412.77	403.254	372.806	550.063	450.241	412.368	CNOT4
ENSG00000080815	806.462	865.858	774.357	1050.67	760.44	914.81	795.262	899.127	PSEN1
ENSG00000080819	506.299	568.4	555.589	619.796	571.919	826.565	548.935	618.092	CPOX
ENSG00000080822	394.19	522.282	359.11	701.552	856.819	775.579	460.844	632.787	CLDND1
ENSG00000080823	12564.7	9396.46	12463.2	11098.9	9124.22	13004.4	11703.8	12916.6	MOK
ENSG00000080824	49613.7	30918.4	39190.1	41468.9	35077.7	38442.6	42609.7	54245.2	HSP90AA1
ENSG00000080839	235.067	194.847	288.114	230.904	198.053	335.332	228.383	311.342	RBL1
ENSG00000080845	2963.05	3272.04	3066.88	3013.91	2937.97	2392.43	3348.26	2890.25	DLGAP4
ENSG00000080947	26.5204	13.8353	10.732	20.9913	14.8275	25.4931	15.4974	15.613	CROCCP3
ENSG00000080986	301.368	277.859	331.867	271.782	311.378	339.254	273.244	415.123	NDC80
ENSG00000081014	172.383	251.341	184.921	172.35	293.373	279.444	185.153	180.927	AP4E1
ENSG00000081019	173.588	154.494	132.912	149.149	127.093	196.101	173.734	177.254	RSBN1
ENSG00000081026	90.4105	76.0941	60.2645	64.0787	62.4874	113.738	80.7497	76.2283	MAGI3
ENSG00000081041	14.4657	13.8353	12.3831	76.2316	33.8915	12.7466	14.6818	5.51048	CXCL2
ENSG00000081052	18.0821	205.223	42.9281	104.957	124.975	233.36	19.5757	26.634	COL4A4
ENSG00000081059	336.327	321.67	462.303	475.066	316.674	301.995	429.849	337.976	TCF7
ENSG00000081087	554.518	741.341	737.208	602.119	670.416	646.152	654.97	797.183	OSTM1
ENSG00000081154	1263.34	1214.05	1245.74	1438.46	1183.02	1546.25	1460.84	1485.07	PCNP
ENSG00000081177	216.985	217.906	215.466	241.952	198.053	267.678	245.512	236.032	EXD2
ENSG00000081181	34.9587	35.7412	42.1026	62.9739	38.1279	39.2202	27.7322	33.9813	ARG2
ENSG00000081189	57.8627	81.8588	52.8346	62.9739	74.1376	49.0252	66.0679	59.6969	MEF2C
ENSG00000081237	63.8901	49.5764	77.6009	61.8691	69.9012	92.1674	55.4644	64.2889	PTPRC
ENSG00000081307	738.955	712.517	742.987	666.198	746.672	814.799	827.073	717.281	UBA5
ENSG00000081320	162.739	127.976	169.236	218.752	204.408	277.483	178.628	211.235	STK17B
ENSG00000081377	230.246	381.623	304.625	317.079	350.565	485.35	250.406	257.156	CDC14B
ENSG00000081386	151.89	102.612	115.576	100.537	101.674	230.418	130.505	124.904	ZNF510
ENSG00000081665	103.671	108.376	88.3329	116.005	102.734	138.251	84.828	87.2493	ZNF506
ENSG00000081692	473.751	556.87	450.745	412.093	417.289	250.029	350.731	301.24	JMJD4
ENSG00000081721	157.917	144.118	137.04	128.157	135.566	95.1089	146.818	158.886	DUSP12
ENSG00000081760	560.545	748.258	743.812	638.578	582.51	704.982	575.036	618.092	AACS
ENSG00000081791	802.846	742.494	794.996	939.085	695.834	869.707	775.686	754.017	KIAA0141
ENSG00000081803	54.2463	64.5647	68.5199	88.3845	103.793	114.719	82.381	105.618	CADPS2
ENSG00000081870	595.504	435.811	506.057	509.315	524.259	402.007	574.22	656.666	HSPB11
ENSG00000081913	216.985	302.07	271.603	371.215	273.25	312.781	194.941	242.461	PHLPP1
ENSG00000081923	732.928	824.352	912.223	1095.97	1053.81	1339.37	582.377	855.961	ATP8B1
ENSG00000082014	372.491	269.788	360.761	261.839	199.112	242.185	358.072	219.501	SMARCD3
ENSG00000082068	643.723	725.2	662.909	625.32	723.371	542.219	579.93	619.929	WDR70
ENSG00000082074	90.4105	50.7294	63.5667	55.2403	72.0194	72.5573	115.007	96.4334	FYB1
ENSG00000082126	108.493	85.3176	113.099	54.1355	86.8469	127.466	64.4366	117.557	MPP4
ENSG00000082146	389.368	313.6	354.983	341.385	364.333	492.213	385.804	416.041	STRADB
ENSG00000082153	2561.63	2509.95	2719.33	2833.83	2507.97	3393.52	2606.01	2793.81	BZW1
ENSG00000082175	18.0821	12.6823	13.2087	19.8865	26.4777	33.3371	48.1235	42.247	PGR
ENSG00000082196	3.61642	12.6823	11.5576	7.73364	9.53198	10.7855	13.0505	11.9394	C1QTNF3
ENSG00000082212	326.683	239.812	302.148	250.791	265.836	433.383	292.82	367.365	ME2
ENSG00000082213	202.52	201.765	224.547	184.503	199.112	280.424	212.07	252.564	C5orf22
ENSG00000082258	156.712	107.223	144.47	143.625	146.157	206.886	187.6	186.438	CCNT2
ENSG00000082269	44.6025	40.3529	47.0558	50.8211	41.3052	52.9472	53.0175	58.7785	FAM135A
ENSG00000082438	51.8354	1019.2	160.98	865.063	1372.6	1254.06	43.2296	56.9416	COBLL1
ENSG00000082458	339.944	223.67	309.578	272.887	300.787	301.995	318.105	332.466	DLG3
ENSG00000082482	71.123	332.047	101.542	293.878	221.354	223.555	53.8331	103.781	KCNK2
ENSG00000082497	14.4657	104.918	26.4173	20.9913	52.9554	23.5321	53.8331	26.634	SERTAD4
ENSG00000082512	122.958	109.529	114.75	98.3277	109.088	99.0309	125.611	116.638	TRAF5
ENSG00000082515	1105.42	873.929	864.341	846.281	1115.24	864.805	1205.54	1078.22	MRPL22
ENSG00000082516	411.067	342.423	468.907	378.948	314.555	403.968	420.877	499.617	GEMIN5
ENSG00000082641	5399.32	6067.93	5948.85	5726.21	5892.88	4479.92	4907.79	5034.74	NFE2L1
ENSG00000082684	429.149	375.859	506.057	448.551	321.969	343.176	611.74	391.244	SEMA5B
ENSG00000082701	1635.83	1466.54	1684.1	1467.18	1819.55	2350.27	1971.43	1965.4	GSK3B
ENSG00000082781	1368.21	3704.4	1823.62	1673.78	2527.03	1835.5	1526.09	993.723	ITGB5
ENSG00000082805	532.819	688.305	762.8	680.56	608.988	704.002	622.344	620.847	ERC1
ENSG00000082898	1861.25	1569.15	1927.64	1767.69	1422.38	2319.87	1831.96	2260.22	XPO1
ENSG00000082996	426.738	368.941	364.889	403.254	497.781	465.739	452.688	402.265	RNF13
ENSG00000083093	214.574	198.306	293.067	213.228	252.068	302.976	231.646	208.48	PALB2
ENSG00000083097	90.4105	78.3999	77.6009	81.7556	77.3149	88.2454	85.6436	74.3915	DOPEY1
ENSG00000083099	741.366	707.905	657.956	642.997	721.253	665.762	676.177	720.036	LYRM2
ENSG00000083123	122.958	153.341	148.597	146.939	137.684	164.725	138.661	150.62	BCKDHB
ENSG00000083168	624.435	596.07	715.744	746.849	792.213	959.914	752.032	855.961	KAT6A
ENSG00000083223	309.807	290.541	305.45	319.289	273.25	396.124	381.726	329.71	ZCCHC6
ENSG00000083290	493.039	582.235	475.512	524.783	459.653	793.228	558.723	585.948	ULK2
ENSG00000083312	2372.37	2262.07	2439.47	2370.91	2313.09	3669.05	2702.26	3164.85	TNPO1
ENSG00000083444	3542.89	2705.95	3693.47	2911.16	2368.17	1875.7	2810.74	2910.45	PLOD1
ENSG00000083454	24.1095	29.9765	19.813	26.5153	36.0097	19.6101	21.207	20.2051	P2RX5
ENSG00000083457	279.67	237.506	220.419	245.267	293.373	272.58	264.272	315.016	ITGAE
ENSG00000083520	257.971	219.059	199.781	248.581	269.014	273.561	255.3	280.116	DIS3
ENSG00000083535	108.493	85.3176	94.9372	92.8037	104.852	112.758	131.32	131.333	PIBF1
ENSG00000083544	216.985	174.094	167.585	171.245	195.935	171.588	213.701	207.561	TDRD3
ENSG00000083635	101.26	83.0117	94.1117	82.8604	87.906	109.816	95.4314	107.454	NUFIP1
ENSG00000083642	303.779	217.906	277.382	270.677	282.782	318.664	277.322	359.1	PDS5B
ENSG00000083720	364.053	224.823	326.914	341.385	231.945	380.436	322.999	420.633	OXCT1
ENSG00000083750	241.095	252.494	244.36	318.184	285.959	338.274	230.014	204.806	RRAGB
ENSG00000083799	965.585	1110.28	1123.56	1037.41	1161.84	1423.69	897.219	1015.77	CYLD
ENSG00000083807	25.315	23.0588	30.545	29.8298	40.2461	22.5516	25.2853	22.0419	SLC27A5
ENSG00000083812	156.712	161.412	179.142	163.511	139.802	142.173	130.505	123.986	ZNF324
ENSG00000083828	16.8766	17.2941	12.3831	15.4673	21.1822	11.766	17.1287	11.021	ZNF586
ENSG00000083838	157.917	194.847	159.329	164.616	153.571	131.388	168.025	163.478	ZNF446
ENSG00000083844	319.451	393.153	334.344	334.756	464.949	372.592	370.307	374.713	ZNF264
ENSG00000083845	16213.6	16114.6	16597.5	16301.4	14033.2	12444.6	12653.2	11263.4	RPS5
ENSG00000083857	1562.29	1817.03	1816.19	1857.18	1875.68	2326.74	1721.84	2135.31	FAT1
ENSG00000083896	871.558	853.176	817.286	796.565	800.686	848.136	925.767	929.434	YTHDC1
ENSG00000083937	437.587	611.058	423.503	574.499	574.037	683.411	514.677	475.738	CHMP2B
ENSG00000084070	90.4105	114.141	151.9	91.6989	97.438	118.641	143.555	120.312	SMAP2
ENSG00000084072	178.41	125.671	153.551	143.625	114.384	124.524	135.398	131.333	PPIE
ENSG00000084073	579.833	654.87	654.654	594.386	620.638	642.23	625.606	751.262	ZMPSTE24
ENSG00000084090	995.721	831.27	1062.47	926.932	816.573	1212.88	1043.22	1052.5	STARD7
ENSG00000084092	380.93	327.435	372.319	369.005	354.801	438.285	436.375	405.02	NOA1
ENSG00000084093	710.024	537.27	526.695	572.289	494.604	457.895	585.639	563.906	REST
ENSG00000084112	450.847	506.141	541.555	610.958	516.845	616.737	492.655	587.785	SSH1
ENSG00000084207	2302.46	1894.28	2223.18	2618.39	1600.31	1157.98	2176.16	2001.22	GSTP1
ENSG00000084234	5183.54	7234.7	7141.76	9168.78	6721.1	6426.22	5778.9	5618.85	APLP2
ENSG00000084444	103.671	58.8	106.495	108.271	42.3643	71.5768	68.5149	105.618	FAM234B
ENSG00000084463	984.872	1020.35	1182.17	1187.67	1032.63	1153.07	1150.89	1159.04	WBP11
ENSG00000084623	3653.79	2926.16	3193.19	2985.19	3301.24	3089.57	3286.27	3150.16	EIF3I
ENSG00000084636	113.315	206.376	127.133	77.3364	135.566	86.2844	92.1688	76.2283	COL16A1
ENSG00000084652	1036.71	1143.72	1151.63	1004.27	1096.18	1099.15	1153.33	1038.73	TXLNA
ENSG00000084676	280.875	290.541	293.067	320.394	300.787	385.338	336.865	337.058	NCOA1
ENSG00000084693	581.038	552.258	610.075	503.791	562.387	673.606	610.924	507.883	AGBL5
ENSG00000084710	121.753	118.753	105.669	64.0787	84.7287	90.2064	142.739	133.17	EFR3B
ENSG00000084731	326.683	347.035	394.609	301.612	334.678	469.661	361.334	394.918	KIF3C
ENSG00000084733	1634.62	1405.43	1490.1	1614.12	1549.48	1984.54	1753.65	1902.03	RAB10
ENSG00000084754	2140.92	1933.48	2164.57	1786.47	1588.66	1908.06	1961.65	2004.9	HADHA
ENSG00000084764	167.561	163.718	176.666	99.4325	156.748	164.725	170.472	146.028	MAPRE3
ENSG00000084774	626.846	816.282	832.145	700.447	647.115	707.924	736.535	804.53	CAD
ENSG00000085063	12884.1	18417.1	14766.5	16151.2	16982.8	13047.6	11026.8	11552.7	CD59
ENSG00000085117	1430.9	1891.98	2399.85	1574.35	1368.37	1205.04	1644.36	1954.38	CD82
ENSG00000085185	242.3	192.541	255.918	241.952	259.482	227.477	222.673	235.114	BCORL1
ENSG00000085224	3470.56	2688.66	2387.46	2764.22	2931.61	2538.53	2918.41	3130.87	ATRX
ENSG00000085231	390.574	380.47	340.123	343.595	418.348	344.157	466.554	531.761	AK6
ENSG00000085274	138.629	133.741	120.529	124.843	133.448	122.563	121.532	137.762	MYNN
ENSG00000085276	85.5886	47.2706	78.4264	101.642	69.9012	95.1089	60.3584	73.4731	MECOM
ENSG00000085365	629.257	611.058	635.667	704.866	654.529	818.721	685.149	806.367	SCAMP1
ENSG00000085377	553.313	473.859	578.704	559.032	529.554	532.414	550.566	620.847	PREP
ENSG00000085382	104.876	109.529	122.18	109.376	101.674	124.524	123.164	167.151	HACE1
ENSG00000085415	335.122	306.682	404.515	361.271	335.737	439.266	351.547	383.897	SEH1L
ENSG00000085433	116.931	117.6	141.168	144.73	121.798	205.906	152.527	169.906	WDR47
ENSG00000085449	430.354	337.812	395.434	445.237	327.265	423.578	412.721	475.738	WDFY1
ENSG00000085491	309.807	317.059	312.88	367.9	307.142	415.734	336.865	406.857	SLC25A24
ENSG00000085511	439.998	359.717	495.325	443.027	375.984	522.609	406.195	500.535	MAP3K4
ENSG00000085514	13.2602	9.22352	16.5108	6.62883	15.8866	12.7466	7.34088	5.51048	PILRA
ENSG00000085644	192.876	272.094	279.033	277.306	275.368	250.029	264.272	204.806	ZNF213
ENSG00000085662	3406.67	4456.11	3180.81	2639.38	2993.04	2779.73	3008.13	2472.37	AKR1B1
ENSG00000085719	1652.7	1411.2	1656.04	1430.72	1285.76	2044.35	1522.01	1646.72	CPNE3
ENSG00000085721	392.984	404.682	502.754	534.726	517.904	585.361	461.66	472.064	RRN3
ENSG00000085733	3710.45	4953.03	4939.21	4143.02	4433.43	3862.21	3631.29	3463.34	CTTN
ENSG00000085741	14.4657	38.047	23.9407	17.6769	21.1822	17.6491	14.6818	11.021	WNT11
ENSG00000085760	497.861	355.106	434.235	452.97	407.757	516.726	485.314	529.924	MTIF2
ENSG00000085788	441.203	652.564	497.801	637.473	544.382	803.033	503.258	516.148	DDHD2
ENSG00000085831	28.9314	33.4353	34.6727	19.8865	26.4777	49.0252	20.3913	18.3683	TTC39A
ENSG00000085832	832.982	1088.38	892.41	889.369	906.597	1193.27	898.034	863.309	EPS15
ENSG00000085840	78.3558	87.6235	118.878	100.537	97.438	97.0699	60.3584	108.373	ORC1
ENSG00000085871	21.6985	27.6706	12.3831	27.6201	36.0097	16.6686	23.6539	27.5524	MGST2
ENSG00000085872	443.614	641.035	722.348	661.779	657.707	702.041	506.521	597.887	CHERP
ENSG00000085978	247.122	236.353	285.637	256.315	245.713	335.332	289.557	271.85	ATG16L1
ENSG00000085982	455.669	526.894	436.711	398.835	459.653	465.739	439.637	436.246	USP40
ENSG00000085998	907.722	965.011	905.618	782.203	916.129	872.649	920.873	901.882	POMGNT1
ENSG00000085999	91.616	76.0941	96.5883	91.6989	83.6696	98.0504	81.5653	121.231	RAD54L
ENSG00000086015	974.023	950.023	1086.41	952.343	898.124	1040.31	963.287	905.556	MAST2
ENSG00000086061	6763.91	5223.97	6224.58	5979.21	6689.33	7674.41	6875.14	7365.67	DNAJA1
ENSG00000086062	4847.21	6464.54	5607.9	5891.93	7060.02	6033.04	5369.45	5263.43	B4GALT1
ENSG00000086065	1745.53	1405.43	1351.41	1387.64	1572.78	1485.46	1791.17	1870.81	CHMP5
ENSG00000086102	940.27	917.741	842.877	838.548	778.445	876.571	896.403	825.654	NFX1
ENSG00000086189	690.737	623.741	686.85	616.482	790.095	838.331	759.373	748.507	DIMT1
ENSG00000086200	353.204	340.117	335.17	302.717	271.132	405.929	331.155	341.65	IPO11
ENSG00000086232	1503.23	1669.46	1724.56	1690.35	1836.49	2054.16	1730.82	1695.39	EIF2AK1
ENSG00000086300	132.602	73.7882	128.784	118.214	70.9603	105.894	149.265	138.68	SNX10
ENSG00000086475	603.942	607.6	615.028	607.643	682.066	598.107	676.177	722.791	SEPHS1
ENSG00000086504	2626.73	2550.3	2367.65	2045	2362.87	1533.51	1907	1734.88	MRPL28
ENSG00000086544	389.368	485.388	474.686	538.04	413.052	302.976	340.943	264.503	ITPKC
ENSG00000086589	778.736	661.788	741.336	901.522	681.007	840.292	736.535	753.099	RBM22
ENSG00000086598	3519.98	3508.4	3327.76	3645.86	3600.97	3322.93	3523.62	4297.26	TMED2
ENSG00000086619	162.739	136.047	126.308	134.786	169.457	150.998	137.845	148.783	ERO1B
ENSG00000086666	554.518	830.117	577.053	675.036	794.332	817.74	601.952	687.892	ZFAND6
ENSG00000086712	344.766	253.647	280.684	320.394	319.851	399.065	358.072	425.225	TXLNG
ENSG00000086730	24.1095	21.9059	16.5108	23.2009	19.064	24.5126	19.5757	17.4499	LAT2
ENSG00000086758	2756.92	2865.06	2996.71	3161.95	2843.71	3227.82	3065.23	3373.33	HUWE1
ENSG00000086827	161.533	157.953	184.096	215.437	139.802	184.335	170.472	195.622	ZW10
ENSG00000086848	62.6846	71.4823	61.09	87.2797	42.3643	68.6353	61.174	67.0442	ALG9
ENSG00000087008	163.944	171.788	211.338	138.101	144.039	178.452	160.684	175.417	ACOX3
ENSG00000087053	243.506	252.494	255.092	382.263	265.836	318.664	260.193	295.729	MTMR2
ENSG00000087074	1463.45	1450.4	1612.28	2420.63	1825.9	1710	1639.46	1463.95	PPP1R15A
ENSG00000087076	449.642	744.799	496.15	660.674	604.751	363.767	371.938	292.055	HSD17B14
ENSG00000087077	2984.75	5233.2	4465.35	3168.58	3078.83	3723.95	2628.04	2684.52	TRIP6
ENSG00000087085	16.8766	61.1058	37.1493	6.62883	19.064	14.7076	28.5479	11.021	ACHE
ENSG00000087086	88103.3	77934.2	72880.4	79384.7	57771.2	68966.7	67614.4	53933.8	FTL
ENSG00000087087	1581.58	1657.93	1892.14	1450.61	1613.02	1468.8	1588.89	1625.59	SRRT
ENSG00000087088	2461.58	2791.27	2803.54	2493.55	2618.12	2064.94	2523.63	2345.63	BAX
ENSG00000087095	409.861	475.011	416.073	465.123	566.623	494.174	433.928	416.96	NLK
ENSG00000087111	851.065	1401.98	1124.39	1154.52	762.558	919.713	842.57	878.922	PIGS
ENSG00000087116	607.559	786.305	612.551	708.181	439.53	362.787	867.04	690.647	ADAMTS2
ENSG00000087152	1143.99	1166.78	1151.63	1194.3	1293.17	1282.5	1190.04	1186.59	ATXN7L3
ENSG00000087157	495.45	440.423	477.163	478.381	462.831	428.48	499.18	495.025	PGS1
ENSG00000087191	3857.52	3922.3	3787.58	3495.61	4197.25	3085.65	3860.49	3685.59	PSMC5
ENSG00000087206	555.723	559.176	649.701	701.552	700.071	643.211	584.008	581.356	UIMC1
ENSG00000087245	2724.37	4330.44	2243.82	2900.12	3653.93	2891.51	4056.24	2663.4	MMP2
ENSG00000087253	51.8354	196	66.8688	123.738	122.857	109.816	96.2471	66.1258	LPCAT2
ENSG00000087258	81.9722	89.9294	85.0307	89.4893	62.4874	79.4208	84.828	87.2493	GNAO1
ENSG00000087263	572.6	650.258	629.062	599.91	685.243	605.952	591.349	586.866	OGFOD1
ENSG00000087266	356.82	345.882	289.765	387.787	345.269	354.942	380.094	367.365	SH3BP2
ENSG00000087269	558.134	540.729	645.573	566.765	548.618	615.757	607.662	573.09	NOP14
ENSG00000087274	2468.81	2822.4	2882.79	2488.02	2396.76	2476.75	2458.38	2476.96	ADD1
ENSG00000087299	68.712	65.7176	72.6476	75.1268	56.1328	94.1284	53.8331	89.0861	L2HGDH
ENSG00000087301	27.7259	20.7529	37.9749	46.4018	31.7733	41.1812	28.5479	38.5734	TXNDC16
ENSG00000087302	1669.58	1416.96	1367.92	1580.98	1383.2	1290.34	1511.41	1562.22	RTRAF
ENSG00000087303	10.8493	10.3765	7.42987	15.4673	8.47287	10.7855	13.0505	6.42889	NID2
ENSG00000087338	167.561	166.023	141.168	157.987	138.743	239.243	164.762	159.804	GMCL1
ENSG00000087365	3993.73	4475.71	4878.95	4593.78	4413.31	4036.74	3874.35	3914.28	SF3B2
ENSG00000087448	372.491	367.788	388.004	385.577	365.393	426.519	378.463	458.288	KLHL42
ENSG00000087460	22726.8	18304.1	23752.5	22331.4	26496.8	18252.1	24994.1	20573.4	GNAS
ENSG00000087470	1397.14	1125.27	1249.87	1189.88	1297.41	1418.79	1499.17	1562.22	DNM1L
ENSG00000087494	16.8766	25.3647	42.1026	28.725	25.4186	4.90252	26.1009	23.8787	PTHLH
ENSG00000087502	1793.75	1368.54	1360.49	1356.7	1450.98	1222.69	1460.84	1623.75	ERGIC2
ENSG00000087510	373.697	525.741	556.415	584.442	365.393	548.102	446.978	510.638	TFAP2C
ENSG00000087586	1364.6	1162.16	1770.79	1453.92	1449.92	1696.27	1336.86	1866.22	AURKA
ENSG00000087589	266.41	330.894	557.24	399.94	174.753	285.327	250.406	292.055	CASS4
ENSG00000087842	61.4792	28.8235	28.8939	54.1355	39.187	28.4346	63.621	43.1654	PIR
ENSG00000087884	220.602	294	222.896	324.813	313.496	213.75	214.517	193.785	AAMDC
ENSG00000087903	86.7941	103.765	108.146	110.481	100.615	87.2649	92.9845	67.9626	RFX2
ENSG00000087995	344.766	302.07	330.216	270.677	380.22	355.923	331.971	342.568	METTL2A
ENSG00000088035	137.424	137.2	132.087	153.568	129.211	95.1089	177.812	230.522	ALG6
ENSG00000088038	453.258	597.223	577.879	628.634	721.253	629.484	570.957	551.966	CNOT3
ENSG00000088179	32.5478	35.7412	35.4983	38.6682	28.5959	47.0642	50.5705	40.4102	PTPN4
ENSG00000088205	725.695	621.435	649.701	612.062	651.352	672.626	667.204	808.204	DDX18
ENSG00000088247	3098.07	3713.62	4968.93	4204.89	4688.67	4551.5	3724.27	3843.56	KHSRP
ENSG00000088256	1300.71	1919.65	1774.09	1538.99	1672.33	1608.03	1429.84	1364.76	GNA11
ENSG00000088280	247.122	322.823	201.432	204.389	230.886	309.839	328.708	362.773	ASAP3
ENSG00000088298	1030.68	887.764	922.129	919.198	816.573	732.437	915.163	911.066	EDEM2
ENSG00000088305	68.712	36.8941	48.7069	62.9739	57.1919	91.1869	75.0401	90.0045	DNMT3B
ENSG00000088320	8.43832	32.2823	6.60433	6.62883	52.9554	19.6101	10.6035	8.26572	REM1
ENSG00000088325	2156.59	1886.21	2678.05	2185.31	2177.53	2352.23	1968.17	3077.6	TPX2
ENSG00000088340	136.219	101.459	70.9965	96.1181	95.3198	67.6548	75.0401	68.881	FER1L4
ENSG00000088356	1043.94	1034.19	921.304	747.954	968.025	782.442	904.56	844.022	PDRG1
ENSG00000088367	882.407	710.211	700.884	541.355	722.312	916.771	901.297	732.894	EPB41L1
ENSG00000088387	270.026	559.176	391.306	408.778	450.121	560.848	300.16	356.344	DOCK9
ENSG00000088448	846.243	758.635	569.623	711.495	844.11	717.729	1026.09	1032.3	ANKRD10
ENSG00000088451	155.506	124.518	133.738	167.93	165.221	166.686	146.818	170.825	TGDS
ENSG00000088538	12.0547	14.9882	13.2087	9.94325	5.29554	22.5516	18.76	15.613	DOCK3
ENSG00000088543	138.629	119.906	148.597	103.852	83.6696	140.212	129.689	144.191	C3orf18
ENSG00000088682	644.929	551.106	586.134	564.556	739.258	656.938	612.556	598.805	COQ9
ENSG00000088726	421.916	555.717	419.375	529.202	453.299	548.102	233.277	287.463	TMEM40
ENSG00000088727	132.602	86.4705	132.912	110.481	137.684	102.953	123.164	100.107	KIF9
ENSG00000088756	44.6025	61.1058	67.6944	71.8124	44.4826	53.9277	53.0175	53.268	ARHGAP28
ENSG00000088766	872.763	932.729	755.37	776.678	878.001	859.902	883.353	978.11	CRLS1
ENSG00000088808	248.328	352.8	323.612	356.852	254.186	394.163	299.345	292.055	PPP1R13B
ENSG00000088812	1383.88	1652.16	1514.87	1457.24	1337.65	1509.98	1516.3	1476.81	ATRN
ENSG00000088826	308.601	389.694	275.731	582.233	480.835	339.254	378.463	360.936	SMOX
ENSG00000088832	5777.84	6373.45	6133.77	5916.24	6741.23	6437.99	6337.63	6523.49	FKBP1A
ENSG00000088833	2425.41	2445.39	2319.77	2099.13	2328.98	1979.64	2193.29	2195.93	NSFL1C
ENSG00000088836	102.465	127.976	89.1584	114.9	147.216	98.0504	94.6158	89.0861	SLC4A11
ENSG00000088854	427.943	405.835	414.422	412.093	352.683	505.94	402.117	386.652	C20orf194
ENSG00000088876	127.78	126.823	171.713	119.319	97.438	130.407	137.03	147.865	ZNF343
ENSG00000088881	68.712	36.8941	48.7069	45.297	32.8324	40.2007	90.5375	79.902	EBF4
ENSG00000088882	137.424	21.9059	57.7879	247.476	13.7684	50.0057	401.301	203.888	CPXM1
ENSG00000088888	3934.67	4581.79	4500.02	3930.9	4630.42	3907.31	4172.88	4520.43	MAVS
ENSG00000088899	353.204	425.435	382.225	328.127	330.442	286.307	422.508	309.505	LZTS3
ENSG00000088930	2092.7	1676.38	1982.95	2018.48	1707.28	2626.77	1912.71	2161.94	XRN2
ENSG00000088970	462.902	290.541	348.378	444.132	355.861	463.778	404.564	397.673	KIZ
ENSG00000088986	5414.99	4815.83	4687.42	4356.25	5364.39	4593.66	5360.47	5171.59	DYNLL1
ENSG00000089006	2155.39	1757.08	2155.49	2073.72	1997.48	2165.93	2101.12	2231.74	SNX5
ENSG00000089009	15439.7	12550.9	13226.8	13198	14161.3	9642.28	12755.2	13351.9	RPL6
ENSG00000089022	453.258	547.647	501.103	444.132	472.362	485.35	420.877	509.719	MAPKAPK5
ENSG00000089048	1417.64	1067.62	1078.98	978.858	1132.19	733.417	1073.4	1227	ESF1
ENSG00000089050	534.025	330.894	527.521	420.931	320.91	409.851	477.157	503.291	RBBP9
ENSG00000089053	1434.51	1614.12	1530.55	1422.99	1524.06	1437.42	1359.69	1432.72	ANAPC5
ENSG00000089057	911.338	1014.59	1032.75	1223.02	1351.42	1596.26	960.024	1029.54	SLC23A2
ENSG00000089060	195.287	312.447	205.56	301.612	240.418	181.393	153.343	200.214	SLC8B1
ENSG00000089063	3255.98	2869.67	2922.42	2958.67	3338.31	3425.88	3234.88	3179.55	TMEM230
ENSG00000089091	66.3011	27.6706	43.7537	49.7163	38.1279	46.0837	48.9392	45.0023	DZANK1
ENSG00000089094	271.232	249.035	252.616	275.097	243.595	254.931	251.221	273.687	KDM2B
ENSG00000089123	132.602	121.059	132.912	143.625	100.615	143.154	113.376	116.638	TASP1
ENSG00000089127	63.8901	141.812	85.0307	138.101	175.812	197.081	67.6992	42.247	OAS1
ENSG00000089154	1418.84	1625.65	1648.61	1489.28	1357.78	1412.91	1207.17	1582.43	GCN1
ENSG00000089157	35199.8	36818	34629	34509.7	33691.3	34035.3	30017.7	28405.6	RPLP0
ENSG00000089159	4398.77	4737.43	5217.42	4229.2	3957.89	4061.25	3901.27	4388.18	PXN
ENSG00000089177	272.437	202.918	260.045	256.315	206.526	276.502	252.853	233.277	KIF16B
ENSG00000089195	521.97	488.847	543.206	461.809	536.968	520.648	514.677	544.619	TRMT6
ENSG00000089220	5765.78	4864.26	4667.61	4296.59	5182.22	3967.12	4658.2	4791.36	PEBP1
ENSG00000089225	12.0547	5.7647	10.732	7.73364	4.23643	20.5906	4.89392	14.6946	TBX5
ENSG00000089234	338.738	359.717	364.064	412.093	401.402	418.675	367.86	360.018	BRAP
ENSG00000089248	1946.84	1572.61	1525.6	1701.4	1484.87	1243.28	1627.23	1733.05	ERP29
ENSG00000089280	6335.97	6798.89	8389.97	6885.15	9233.31	6854.7	6800.92	7380.37	FUS
ENSG00000089289	2166.24	1663.69	1702.27	1919.05	1781.42	1759.02	1992.64	1687.13	IGBP1
ENSG00000089327	12187.3	16211.5	14566.7	11343	13423.1	8791.2	10574.9	9831.61	FXYD5
ENSG00000089335	145.862	94.5411	123.006	125.948	88.9651	93.1479	148.449	117.557	ZNF302
ENSG00000089351	1336.87	1353.55	1434.79	1525.74	1667.04	1479.58	1482.86	1345.48	GRAMD1A
ENSG00000089486	153.095	127.976	281.509	112.69	134.507	100.992	191.679	110.21	CDIP1
ENSG00000089597	5140.14	6033.34	6783.47	6175.86	5977.61	5304.53	5013.82	5823.66	GANAB
ENSG00000089639	227.835	368.941	357.459	350.223	317.733	317.683	279.769	249.808	GMIP
ENSG00000089682	253.15	206.376	208.862	227.59	233.004	276.502	202.282	228.685	RBM41
ENSG00000089685	1556.27	1451.55	1814.54	1482.65	1556.89	1773.73	1246.32	1695.39	BIRC5
ENSG00000089692	14.4657	20.7529	12.3831	11.0481	19.064	24.5126	16.3131	14.6946	LAG3
ENSG00000089693	4125.13	4295.86	4404.26	3544.22	4290.45	3568.05	4358.85	4007.04	MLF 2.00
ENSG00000089723	13.2602	16.1412	11.5576	11.0481	9.53198	9.80504	6.52523	9.18413	OTUB2
ENSG00000089737	1691.28	1700.59	1779.87	2007.43	1605.61	1512.92	1751.21	1805.6	DDX24
ENSG00000089775	213.369	122.212	185.747	213.228	150.393	183.354	202.282	188.275	ZBTB25
ENSG00000089818	308.601	272.094	309.578	238.638	312.437	375.533	326.261	407.776	NECAP1
ENSG00000089820	28.9314	29.9765	25.5918	41.9826	33.8915	16.6686	39.967	16.5314	ARHGAP4
ENSG00000089876	396.601	280.165	363.238	320.394	353.742	373.572	382.541	403.183	DHX32
ENSG00000089902	505.094	433.506	570.449	683.875	401.402	876.571	587.27	771.467	RCOR1
ENSG00000089916	397.806	320.517	358.285	415.407	303.964	427.5	402.117	455.533	GPATCH2L
ENSG00000090006	405.039	379.317	445.792	420.931	277.486	300.034	348.284	330.629	LTBP4
ENSG00000090013	1218.73	1307.43	962.581	1167.78	1036.87	756.949	1058.72	738.404	BLVRB
ENSG00000090020	519.559	583.388	740.51	657.359	543.323	549.082	634.578	686.055	SLC9A1
ENSG00000090054	743.777	622.588	645.573	779.993	755.145	904.025	776.502	968.926	SPTLC1
ENSG00000090060	2536.32	2287.43	2455.98	2711.19	2161.64	3505.3	2557.07	2849.84	PAPOLA
ENSG00000090061	165.15	207.529	264.999	312.66	207.585	387.299	246.327	271.85	CCNK
ENSG00000090097	1453.8	1459.62	1438.92	1260.58	1151.25	1128.56	1364.59	1177.41	PCBP4
ENSG00000090238	612.381	591.458	482.941	676.141	632.288	503.979	625.606	454.615	YPEL3
ENSG00000090263	614.792	856.635	628.237	454.075	768.913	721.651	613.371	562.987	MRPS33
ENSG00000090266	2159	2526.09	2455.16	1722.39	1775.07	1501.15	1893.95	1891.01	NDUFB2
ENSG00000090273	2897.96	2783.2	2798.58	2690.2	2962.33	2169.86	2605.2	2621.15	NUDC
ENSG00000090316	769.092	734.423	815.635	703.761	850.464	876.571	839.307	782.488	MAEA
ENSG00000090339	1475.5	2174.45	1790.6	2507.91	1864.03	1664.9	1308.31	1435.48	ICAM1
ENSG00000090372	925.804	1310.89	1335.73	1213.08	1333.42	1321.72	1116.63	1045.15	STRN4
ENSG00000090382	16.8766	20.7529	14.8597	7.73364	13.7684	13.7271	15.4974	16.5314	LYZ
ENSG00000090432	455.669	500.376	454.048	486.115	421.525	422.597	449.425	477.575	MUL1
ENSG00000090447	237.478	197.153	235.279	201.075	180.048	162.764	174.55	156.13	TFAP4
ENSG00000090470	466.518	593.764	457.35	460.704	636.524	691.255	429.034	416.041	PDCD7
ENSG00000090487	893.256	1209.43	1013.76	1014.21	1209.5	1236.42	962.471	857.798	SPG21
ENSG00000090520	527.998	641.035	552.287	605.434	710.662	498.096	576.667	656.666	DNAJB11
ENSG00000090530	14.4657	24.2117	15.6853	19.8865	28.5959	13.7271	13.8661	22.0419	P3H2
ENSG00000090539	55.4518	110.682	38.8004	32.0394	74.1376	66.6743	49.7549	36.7365	CHRD
ENSG00000090554	43.3971	50.7294	50.358	70.7076	36.0097	64.7133	46.4922	36.7365	FLT3LG
ENSG00000090565	1096.98	1369.69	1007.99	1124.69	1323.89	1307.99	925.767	990.05	RAB11FIP3
ENSG00000090581	1246.46	1290.14	1202.81	1346.76	1660.68	1100.13	1257.74	1029.54	GNPTG
ENSG00000090612	207.342	159.106	151.9	148.044	145.098	160.803	176.997	203.888	ZNF268
ENSG00000090615	1063.23	1118.35	1115.31	870.587	1252.93	938.342	947.789	1070.87	GOLGA3
ENSG00000090621	4472.31	5486.84	5270.25	4632.45	4865.55	5070.19	4700.61	4714.22	PABPC4
ENSG00000090661	72.3284	47.2706	66.8688	59.6595	43.4235	75.4988	30.1792	30.3076	CERS4
ENSG00000090674	327.889	463.482	302.974	336.966	375.984	343.176	366.228	322.363	MCOLN1
ENSG00000090686	620.819	573.011	643.922	663.988	560.269	724.593	556.276	709.933	USP48
ENSG00000090776	1810.62	1857.39	1858.29	2146.64	1901.1	1551.16	1766.71	1731.21	EFNB1
ENSG00000090857	425.532	439.27	395.434	445.237	494.604	498.096	410.274	385.734	PDPR
ENSG00000090861	2448.32	2458.07	2855.55	2691.31	2184.94	2038.47	2420.86	2381.45	AARS
ENSG00000090863	3874.39	4294.7	4305.2	4025.91	4040.5	3406.27	3539.12	3557.01	GLG1
ENSG00000090889	552.107	488.847	638.969	582.233	510.49	751.066	508.152	732.894	KIF4A
ENSG00000090905	1115.06	961.552	1112	1072.77	990.267	1026.59	942.895	890.861	TNRC6A
ENSG00000090924	204.931	413.906	302.148	457.39	411.993	287.288	221.042	213.99	PLEKHG2
ENSG00000090971	755.832	598.376	663.735	693.818	777.386	534.375	538.331	567.579	NAT14
ENSG00000090975	163.944	219.059	202.258	188.922	142.98	223.555	159.868	208.48	PITPNM2
ENSG00000090989	444.82	397.764	403.69	446.342	396.107	448.09	413.536	465.636	EXOC1
ENSG00000091009	531.614	438.117	459.826	503.791	426.821	463.778	526.912	529.924	RBM27
ENSG00000091039	1233.2	811.67	1023.67	1119.17	910.833	1293.28	1025.28	1364.76	OSBPL8
ENSG00000091073	546.08	545.341	531.648	468.438	491.426	391.221	449.425	478.493	DTX2
ENSG00000091127	167.561	220.212	255.918	211.018	204.408	330.43	192.494	258.074	PUS7
ENSG00000091129	12.0547	12.6823	7.42987	13.2577	5.29554	14.7076	26.9166	27.5524	NRCAM
ENSG00000091136	5112.41	5482.23	5954.63	7043.14	6357.83	5798.7	4457.55	5570.18	LAMB1
ENSG00000091137	14.4657	29.9765	14.8597	14.3625	33.8915	31.3761	16.3131	17.4499	SLC26A4
ENSG00000091140	1122.3	1241.72	1431.49	928.037	980.735	1319.76	1154.15	1313.33	DLD
ENSG00000091157	168.766	137.2	165.934	154.673	152.512	215.711	162.315	217.664	WDR7
ENSG00000091164	1160.87	952.329	891.584	1074.98	953.198	914.81	1113.37	1115.87	TXNL1
ENSG00000091262	10.8493	29.9765	15.6853	14.3625	29.655	7.84403	35.0731	22.0419	ABCC6
ENSG00000091317	1938.4	1934.63	1636.22	1850.55	2524.92	2316.93	2073.39	2358.49	CMTM6
ENSG00000091409	924.598	586.847	1041.01	659.569	820.809	1262.89	735.719	1193.94	ITGA6
ENSG00000091428	14.4657	12.6823	13.2087	11.0481	11.6502	11.766	7.34088	11.021	RAPGEF4
ENSG00000091436	4451.81	2647.15	4130.18	3659.12	3108.48	3937.7	3676.15	3837.13	MAP3K20
ENSG00000091483	1292.27	1022.66	1289.5	1083.81	1294.23	1084.44	1412.71	1429.05	FH
ENSG00000091490	499.066	349.341	667.037	300.507	266.895	653.996	508.968	521.659	SEL1L3
ENSG00000091527	5271.54	6292.75	5881.15	5515.19	5477.71	7266.52	5268.31	5530.69	CDV3
ENSG00000091536	25.315	24.2117	26.4173	17.6769	21.1822	15.6881	23.6539	16.5314	MYO15A
ENSG00000091542	1645.47	1832.02	1638.7	1649.48	1678.69	1451.15	1685.14	1664.16	ALKBH5
ENSG00000091592	186.848	192.541	203.909	264.049	207.585	212.769	244.696	224.093	NLRP1
ENSG00000091622	253.15	230.588	431.758	306.031	238.299	395.143	272.428	338.895	PITPNM3
ENSG00000091640	1480.32	1184.07	1063.3	1171.09	1356.72	1070.71	1359.69	1254.55	SPAG7
ENSG00000091651	236.273	201.765	289.765	187.817	360.097	373.572	274.875	333.384	ORC6
ENSG00000091656	367.67	268.635	306.276	374.529	332.56	294.151	282.216	337.058	ZFHX4
ENSG00000091732	411.067	388.541	447.443	287.25	317.733	346.118	377.648	315.934	ZC3HC1
ENSG00000091844	18.0821	9.22352	32.1961	19.8865	7.41376	18.6296	26.1009	22.0419	RGS17
ENSG00000091947	744.983	529.2	600.994	547.984	559.209	400.046	597.874	536.353	TMEM101
ENSG00000091972	28.9314	5.7647	8.25541	13.2577	20.1231	27.4541	31.8105	27.5524	CD200
ENSG00000091986	4549.46	5242.42	5594.69	5013.61	2854.3	2126.71	5371.89	4201.74	CCDC80
ENSG00000092010	2721.96	3011.48	2425.44	3391.75	2814.05	2689.52	2467.35	2352.06	PSME1
ENSG00000092020	358.026	319.364	266.65	227.59	168.398	241.204	261.825	259.911	PPP2R3C
ENSG00000092036	261.588	146.423	213.815	279.516	186.403	237.282	217.779	261.748	HAUS4
ENSG00000092054	3.61642	18.447	16.5108	9.94325	23.3004	2.94151	15.4974	9.18413	MYH7
ENSG00000092068	42.1916	54.1882	47.8814	67.3932	58.251	54.9082	49.7549	25.7156	SLC7A8
ENSG00000092094	337.533	330.894	330.216	330.337	401.402	300.034	331.155	303.076	OSGEP
ENSG00000092096	12.0547	10.3765	5.77879	24.3057	23.3004	16.6686	19.5757	9.18413	SLC22A17
ENSG00000092098	192.876	292.847	270.777	291.669	198.053	295.132	199.835	191.03	RNF31
ENSG00000092108	755.832	730.964	760.323	914.779	787.977	857.941	814.022	840.348	SCFD1
ENSG00000092140	229.04	178.706	191.526	270.677	160.985	303.956	223.489	298.484	G2E3
ENSG00000092148	1116.27	1034.19	1101.27	1271.63	1080.29	1659.99	1191.67	1313.33	HECTD1
ENSG00000092199	8613.11	6797.74	8584.8	9196.4	8394.5	8616.67	8160.61	8836.97	HNRNPC
ENSG00000092201	1820.27	1568	1892.14	1959.93	1670.21	2222.8	1639.46	1992.04	SUPT16H
ENSG00000092203	1259.72	1246.33	1350.59	1553.36	1142.78	1471.74	1150.89	1258.23	TOX4
ENSG00000092208	156.712	136.047	132.087	148.044	122.857	119.621	173.734	188.275	GEMIN2
ENSG00000092295	22.904	83.0117	32.1961	40.8778	46.6008	51.9667	40.7827	21.1235	TGM1
ENSG00000092330	612.381	852.023	718.221	776.678	619.579	731.456	690.043	657.584	TINF2
ENSG00000092421	26.5204	48.4235	27.2429	54.1355	38.1279	33.3371	33.4418	22.9603	SEMA6A
ENSG00000092439	321.862	451.953	281.509	391.101	438.471	627.523	314.027	362.773	TRPM7
ENSG00000092445	192.876	292.847	197.304	212.123	262.659	254.931	171.287	184.601	TYRO3
ENSG00000092470	113.315	146.423	160.98	153.568	180.048	199.042	97.8784	123.067	WDR76
ENSG00000092531	429.149	758.635	517.614	673.932	740.317	988.348	527.728	507.883	SNAP23
ENSG00000092607	19.2876	14.9882	15.6853	20.9913	15.8866	25.4931	19.5757	18.3683	TBX15
ENSG00000092621	456.875	396.611	388.83	446.342	400.343	301.995	482.051	462.88	PHGDH
ENSG00000092758	34.9587	16.1412	19.813	40.8778	31.7733	20.5906	17.9444	42.247	COL9A3
ENSG00000092820	14981.6	19246	18352.6	13706.2	15543.5	13586.8	14875.9	16972.3	EZR
ENSG00000092841	31846.2	31263.1	25822.1	24514.5	26616.5	18359.9	25445.9	24349.9	MYL6
ENSG00000092847	453.258	536.117	434.235	443.027	446.944	493.194	416.799	440.838	AGO1
ENSG00000092853	374.902	395.459	462.303	311.555	425.762	301.015	373.569	495.025	CLSPN
ENSG00000092871	190.465	219.059	224.547	257.42	222.413	294.151	225.936	254.4	RFFL
ENSG00000092929	711.23	958.093	689.327	859.539	760.44	741.261	607.662	595.132	UNC13D
ENSG00000092931	190.465	228.282	216.292	203.284	148.275	174.53	183.522	247.972	MFSD11
ENSG00000092964	5446.33	4525.29	4676.69	4893.18	4295.74	4186.75	4543.19	4617.78	DPYSL2
ENSG00000092969	37.3697	187.929	92.4606	89.4893	37.0688	48.0447	150.08	50.5127	TGFB2
ENSG00000092978	276.054	237.506	241.884	314.87	253.127	267.678	261.009	304.913	GPATCH2
ENSG00000093000	622.025	579.929	662.084	593.281	577.214	849.117	663.942	762.283	NUP50
ENSG00000093009	201.314	147.576	246.011	180.083	204.408	206.886	165.578	219.501	CDC45
ENSG00000093010	1400.76	1742.09	1324.99	1509.16	1846.03	1331.52	1550.56	1336.29	COMT
ENSG00000093144	1064.43	945.411	1009.64	1044.04	1081.35	1075.61	1013.86	1159.96	ECHDC1
ENSG00000093167	2450.73	3313.55	2180.25	2479.18	3381.73	3415.1	2644.35	2673.5	LRRFIP2
ENSG00000093183	857.092	921.199	907.27	821.976	823.987	1144.25	860.514	866.064	SEC22C
ENSG00000093217	44.6025	41.5059	49.5325	38.6682	37.0688	41.1812	42.414	45.9207	XYLB
ENSG00000094631	368.875	404.682	397.911	382.263	390.811	423.578	384.988	405.939	HDAC6
ENSG00000094804	500.272	464.635	673.641	485.01	540.145	695.177	475.526	658.502	CDC6
ENSG00000094841	157.917	134.894	147.772	188.922	139.802	201.003	191.679	193.785	UPRT
ENSG00000094880	575.011	575.317	595.215	578.918	620.638	731.456	615.818	709.015	CDC23
ENSG00000094914	491.833	538.423	519.265	509.315	520.022	398.085	484.498	545.538	AAAS
ENSG00000094916	2151.77	2249.39	2671.45	2363.18	2481.49	2106.12	2157.4	2795.65	CBX5
ENSG00000094963	10.8493	25.3647	4.1277	24.3057	105.911	18.6296	24.4696	11.9394	FMO2
ENSG00000094975	402.628	431.2	402.038	458.494	405.639	508.882	431.481	574.008	SUCO
ENSG00000095002	253.15	184.47	247.662	228.695	251.009	337.293	290.373	391.244	MSH2
ENSG00000095015	103.671	204.07	151.074	159.092	149.334	196.101	169.656	181.846	MAP3K1
ENSG00000095059	636.49	636.423	640.62	688.294	651.352	542.219	645.997	619.011	DHPS
ENSG00000095066	192.876	228.282	189.049	213.228	121.798	150.017	132.136	106.536	HOOK2
ENSG00000095139	1405.58	1611.81	1716.3	2194.14	1601.37	2037.49	1672.09	1754.17	ARCN1
ENSG00000095203	137.424	116.447	127.133	91.6989	106.97	122.563	119.085	153.375	EPB41L4B
ENSG00000095209	279.67	196	297.195	338.071	283.841	317.683	305.054	377.468	TMEM38B
ENSG00000095261	277.259	234.047	333.519	352.433	330.442	356.903	305.87	355.426	PSMD5
ENSG00000095319	583.449	493.458	619.156	509.315	558.15	604.971	579.93	722.791	NUP188
ENSG00000095370	8.43832	20.7529	12.3831	19.8865	26.4777	4.90252	13.0505	1.83683	SH2D3C
ENSG00000095380	1896.21	1856.23	1951.58	1627.38	1945.58	1497.23	1944.52	1739.47	NANS
ENSG00000095383	4692.91	6242.02	6052.04	4056.85	3626.39	3963.2	5016.27	4446.96	TBC1D2
ENSG00000095397	40.9861	43.8117	34.6727	55.2403	44.4826	56.8692	55.4644	28.4708	WHRN
ENSG00000095485	515.943	390.847	452.396	387.787	400.343	400.046	460.029	478.493	CWF19L1
ENSG00000095539	20.4931	16.1412	12.3831	7.73364	18.0048	11.766	13.8661	16.5314	SEMA4G
ENSG00000095564	343.56	310.141	385.528	450.761	319.851	504.96	411.905	563.906	BTAF1
ENSG00000095574	192.876	153.341	201.432	195.551	173.694	263.756	224.305	238.787	IKZF5
ENSG00000095637	14.4657	13.8353	13.2087	45.297	28.5959	28.4346	17.9444	24.7972	SORBS1
ENSG00000095739	192.876	164.87	211.338	171.245	140.861	210.808	253.668	221.338	BAMBI
ENSG00000095752	331.505	277.859	257.569	652.94	464.949	417.695	465.738	564.824	IL11
ENSG00000095787	1021.04	872.776	880.027	1091.55	932.016	1132.48	1100.32	1096.59	WAC
ENSG00000095794	165.15	159.106	129.61	144.73	193.817	150.998	190.863	206.643	CREM
ENSG00000095906	1650.29	1639.48	1589.99	1432.93	1693.51	1208.96	1402.92	1287.62	NUBP2
ENSG00000095951	165.15	240.965	217.117	198.865	167.339	179.432	144.371	172.662	HIVEP1
ENSG00000096060	274.848	239.812	399.562	261.839	354.801	769.696	403.748	421.552	FKBP5
ENSG00000096063	793.202	643.341	824.715	715.914	678.889	897.161	784.659	948.721	SRPK1
ENSG00000096070	345.971	392	408.643	448.551	531.673	731.456	439.637	513.393	BRPF3
ENSG00000096080	427.943	442.729	416.073	395.52	424.703	340.235	384.988	361.855	MRPS18A
ENSG00000096092	107.287	118.753	96.5883	81.7556	67.783	86.2844	111.745	106.536	TMEM14A
ENSG00000096093	206.136	141.812	166.759	180.083	159.925	157.861	172.919	187.356	EFHC1
ENSG00000096384	25111.2	23003.5	26503.2	25250.3	24903.9	25098	24250.2	27752.6	HSP90AB1
ENSG00000096401	936.653	769.011	885.805	825.29	912.952	1048.16	941.264	1091.08	CDC5L
ENSG00000096433	1070.46	1677.53	1843.43	1430.72	1150.19	1857.07	1007.33	1181.08	ITPR3
ENSG00000096654	69.9175	56.4941	58.6134	50.8211	63.5465	81.3818	64.4366	81.7388	ZNF184
ENSG00000096696	699.175	1403.13	831.32	1035.2	1067.58	512.804	1398.85	540.027	DSP
ENSG00000096717	257.971	168.329	213.815	299.402	275.368	419.656	362.15	395.836	SIRT1
ENSG00000096746	1937.2	1682.14	1750.15	1787.58	1800.48	2012.97	1907.81	2306.14	HNRNPH3
ENSG00000096872	174.794	122.212	114.75	127.053	137.684	118.641	169.656	156.13	IFT74
ENSG00000096968	145.862	103.765	146.946	146.939	131.329	175.51	155.79	148.783	JAK2
ENSG00000096996	21.6985	19.6	43.7537	40.8778	41.3052	20.5906	10.6035	17.4499	IL12RB1
ENSG00000097007	770.298	837.035	994.777	1112.54	990.267	1002.08	914.347	926.679	ABL1
ENSG00000097021	1723.83	1644.09	1698.14	910.36	1579.13	1399.18	1928.2	1547.53	ACOT7
ENSG00000097033	1119.89	1308.59	1198.69	1238.49	1400.14	1391.34	1254.47	1296.8	SH3GLB1
ENSG00000097046	59.0682	40.3529	42.1026	64.0787	47.6599	67.6548	42.414	83.5756	CDC7
ENSG00000097096	12.0547	44.9647	33.0216	17.6769	32.8324	41.1812	30.1792	33.0629	SYDE2
ENSG00000099139	22.904	16.1412	10.732	12.1529	13.7684	14.7076	11.4191	9.18413	PCSK5
ENSG00000099194	4912.31	3598.33	6792.55	6568.07	5897.12	11978.8	3948.58	7702.73	SCD
ENSG00000099203	392.984	408.141	397.911	452.97	439.53	301.995	362.966	326.037	TMED1
ENSG00000099204	44.6025	149.882	75.1242	48.6115	66.7238	71.5768	97.8784	39.4918	ABLIM1
ENSG00000099219	165.15	212.141	212.99	211.018	238.299	272.58	157.421	204.806	ERMP1
ENSG00000099246	682.298	763.247	740.51	711.495	758.322	738.32	743.06	780.651	RAB18
ENSG00000099250	4302.34	3079.5	3968.38	4314.27	3911.29	4311.28	3869.46	4383.59	NRP1
ENSG00000099251	10.8493	6.91764	9.90649	13.2577	6.35465	9.80504	16.3131	11.9394	HSD17B7P2
ENSG00000099282	106.082	166.023	100.716	130.367	98.4971	94.1284	104.404	97.3518	TSPAN15
ENSG00000099284	63.8901	19.6	53.6602	145.834	123.916	76.4793	130.505	78.9835	H2AFY2
ENSG00000099290	1063.23	879.694	1035.23	899.312	789.036	942.264	1049.75	911.984	WASHC2A
ENSG00000099308	101.26	103.765	133.738	93.9085	105.911	100.992	96.2471	81.7388	MAST3
ENSG00000099326	291.725	294	269.126	272.887	380.22	268.658	303.423	248.89	MZF1
ENSG00000099330	213.369	308.988	202.258	266.258	267.955	213.75	191.679	173.58	OCEL1
ENSG00000099331	1632.21	2249.39	2455.16	2125.65	1848.14	1955.13	1660.67	1678.86	MYO9B
ENSG00000099337	22.904	48.4235	37.1493	18.7817	29.655	24.5126	23.6539	20.2051	KCNK6
ENSG00000099341	2530.29	2983.81	2918.29	2606.24	2807.7	2523.82	2340.11	2163.78	PSMD8
ENSG00000099364	632.874	727.505	718.221	787.727	751.967	641.25	593.796	529.924	FBXL19
ENSG00000099365	57.8627	49.5764	49.5325	35.3538	31.7733	31.3761	27.7322	29.3892	STX1B
ENSG00000099377	548.491	441.576	474.686	378.948	400.343	266.697	388.251	275.524	HSD3B7
ENSG00000099381	465.313	660.635	596.041	553.508	552.855	557.907	485.314	482.167	SETD1A
ENSG00000099385	1899.83	1679.83	1715.47	1613.02	1149.13	1295.25	1345.01	1162.71	BCL7C
ENSG00000099622	3458.5	4038.75	3825.56	5042.33	4715.15	3038.58	3628.03	2983.92	CIRBP
ENSG00000099624	2114.4	2393.5	2180.25	2052.73	2089.62	1480.56	1766.71	1517.22	ATP5F1D
ENSG00000099625	89.2051	76.0941	82.5541	101.642	34.9506	59.8107	92.9845	65.2073	CBARP
ENSG00000099725	126.575	54.1882	75.9498	95.0133	48.719	74.5183	85.6436	79.902	PRKY
ENSG00000099783	4985.84	5212.44	6025.62	5491.99	5060.42	4668.18	4928.18	5617.02	HNRNPM
ENSG00000099785	294.136	547.647	369.017	279.516	396.107	270.619	274.06	196.54	MARCH2
ENSG00000099795	3067.93	2844.3	2387.46	2133.38	2531.27	1617.83	1983.67	1715.6	NDUFB7
ENSG00000099797	1452.6	1257.86	1699.79	1717.97	1731.64	1195.23	1512.22	1730.29	TECR
ENSG00000099800	1371.83	1506.89	1415.8	1415.26	1531.47	1109.93	1189.22	1218.73	TIMM13
ENSG00000099804	1535.77	1838.94	1571	1431.83	1544.18	1402.12	1367.04	1199.45	CDC34
ENSG00000099810	581.038	394.306	555.589	504.896	467.067	513.784	567.695	663.094	MTAP
ENSG00000099812	159.123	549.953	315.357	217.647	344.21	246.107	145.186	105.618	MISP
ENSG00000099814	1093.36	1859.69	1626.32	1341.23	1196.79	1460.95	1287.92	1248.12	CEP170B
ENSG00000099817	2631.55	3341.22	3229.52	3009.49	3187.92	2684.62	2588.07	2548.6	POLR2E
ENSG00000099821	888.434	991.529	998.905	915.884	870.587	703.021	765.899	758.609	POLRMT
ENSG00000099822	157.917	337.812	334.344	288.354	234.063	189.237	172.919	110.21	HCN2
ENSG00000099840	27.7259	40.3529	29.7195	48.6115	55.0737	10.7855	21.207	23.8787	IZUMO4
ENSG00000099849	462.902	1019.2	551.461	549.088	551.796	427.5	385.804	366.447	RASSF7
ENSG00000099860	438.792	571.858	507.708	658.464	1120.54	762.832	569.326	617.174	GADD45B
ENSG00000099864	313.423	406.988	278.207	205.494	384.456	250.029	323.814	228.685	PALM
ENSG00000099866	8.43832	13.8353	7.42987	15.4673	18.0048	9.80504	10.6035	12.8578	MADCAM1
ENSG00000099875	1258.51	1317.81	1301.05	1449.51	1335.54	1725.69	1091.34	1045.15	MKNK2
ENSG00000099889	67.5065	93.3882	99.0649	89.4893	75.1967	85.3039	73.4088	91.8413	ARVCF
ENSG00000099899	524.381	450.8	457.35	433.084	452.239	437.305	522.834	478.493	TRMT2A
ENSG00000099901	1567.12	1428.49	1779.87	1290.41	1438.27	1457.03	1553	1675.19	RANBP1
ENSG00000099904	360.437	457.717	402.864	406.569	446.944	414.753	384.988	356.344	ZDHHC8
ENSG00000099910	473.751	425.435	433.409	409.883	400.343	381.416	372.754	348.997	KLHL22
ENSG00000099917	1265.75	1525.34	1623.01	1569.93	1544.18	1360.94	1389.06	1397.83	MED15
ENSG00000099937	22.904	6.91764	8.25541	29.8298	27.5368	1.96101	8.15653	9.18413	SERPIND1
ENSG00000099940	591.888	642.188	605.122	688.294	637.583	653.996	673.73	607.99	SNAP29
ENSG00000099942	484.6	487.694	500.278	533.621	606.869	707.924	522.018	624.521	CRKL
ENSG00000099949	625.641	788.611	586.96	599.91	649.234	569.673	538.331	511.556	LZTR1
ENSG00000099953	259.177	314.753	209.687	182.293	254.186	199.042	306.686	207.561	MMP11
ENSG00000099956	1541.8	1429.65	1569.35	1490.38	1416.03	1346.23	1525.27	1497.01	SMARCB1
ENSG00000099957	20.4931	9.22352	17.3364	14.3625	14.8275	17.6491	13.0505	11.021	P2RX6
ENSG00000099958	13.2602	10.3765	18.1619	15.4673	6.35465	6.86353	13.8661	3.67365	DERL3
ENSG00000099960	150.684	126.823	140.342	193.341	120.738	134.329	101.957	123.986	SLC7A4
ENSG00000099968	556.929	607.6	576.228	640.787	646.056	756.949	622.344	582.274	BCL2L13
ENSG00000099977	477.368	347.035	340.123	374.529	259.482	279.444	402.117	356.344	DDT
ENSG00000099991	855.886	1050.33	1091.37	890.473	1020.98	954.03	863.777	860.553	CABIN1
ENSG00000099992	203.725	240.965	245.186	204.389	176.871	182.374	212.07	182.764	TBC1D10A
ENSG00000099994	425.532	523.435	260.045	761.211	620.638	297.093	386.62	290.219	SUSD2
ENSG00000099995	964.379	1132.19	1222.63	1269.42	1134.31	1334.47	1147.62	1227	SF3A1
ENSG00000099998	1082.52	1268.23	601.819	1471.6	1168.2	649.094	939.633	673.197	GGT5
ENSG00000099999	160.328	142.965	137.04	139.206	144.039	108.836	161.499	155.212	RNF215
ENSG00000100003	619.614	632.964	653.003	640.787	711.721	505.94	936.37	511.556	SEC14L2
ENSG00000100014	455.669	513.058	472.209	456.285	526.377	525.55	542.41	517.067	SPECC1L
ENSG00000100023	386.957	358.564	399.562	325.918	382.338	369.65	410.274	416.96	PPIL2
ENSG00000100027	9.64379	12.6823	11.5576	7.73364	7.41376	17.6491	7.34088	6.42889	YPEL1
ENSG00000100028	990.9	881.999	953.5	905.941	1023.1	770.676	880.09	939.537	SNRPD3
ENSG00000100029	1618.95	1478.07	1714.65	1586.5	1578.07	1178.57	1510.59	1479.56	PES 1.00
ENSG00000100030	910.133	877.388	1032.75	1002.06	891.77	1423.69	957.577	1189.35	MAPK1
ENSG00000100034	766.681	792.07	823.064	619.796	701.13	762.832	616.634	701.668	PPM1F
ENSG00000100036	243.506	264.023	240.232	251.896	217.117	239.243	202.282	245.216	SLC35E4
ENSG00000100055	13.2602	9.22352	18.9874	7.73364	4.23643	11.766	8.15653	7.34731	CYTH4
ENSG00000100056	368.875	382.776	393.783	356.852	370.688	336.313	402.117	340.731	ESS2
ENSG00000100058	61.4792	68.0235	85.8563	83.9652	88.9651	73.5378	88.0906	88.1677	CRYBB2P1
ENSG00000100065	654.572	893.529	882.503	733.591	631.229	668.704	605.215	730.139	CARD10
ENSG00000100068	9.64379	16.1412	12.3831	16.5721	12.7093	11.766	12.2348	8.26572	LRP5L
ENSG00000100075	2829.25	2928.47	3191.54	2839.35	2818.29	2727.76	2463.27	2533.9	SLC25A1
ENSG00000100077	61.4792	71.4823	95.7628	60.7643	56.1328	94.1284	68.5149	78.9835	GRK3
ENSG00000100083	330.3	352.8	339.297	323.708	328.324	313.761	315.658	290.219	GGA1
ENSG00000100084	196.492	199.459	189.874	178.979	187.462	178.452	208.807	200.214	HIRA
ENSG00000100092	135.013	103.765	138.691	130.367	87.906	88.2454	135.398	146.028	SH3BP1
ENSG00000100097	46561.4	41712.2	41404.2	37301.6	37726.5	29175.9	36800.6	36060.6	LGALS1
ENSG00000100099	312.218	421.976	322.787	374.529	285.959	396.124	311.58	294.811	HPS4
ENSG00000100100	201.314	255.953	202.258	270.677	233.004	159.822	194.941	156.13	PIK3IP1
ENSG00000100104	183.232	174.094	176.666	208.808	178.989	186.296	169.656	177.254	SRRD
ENSG00000100105	400.217	395.459	373.145	427.56	368.57	394.163	393.145	413.286	PATZ1
ENSG00000100106	2061.36	2107.58	2119.16	1700.3	1895.8	1999.25	2070.94	1923.16	TRIOBP
ENSG00000100109	397.806	424.282	459.001	447.446	321.969	374.553	407.827	377.468	TFIP11
ENSG00000100116	167.561	106.071	136.214	195.551	155.689	183.354	177.812	158.886	GCAT
ENSG00000100124	358.026	321.67	373.145	309.346	424.703	326.508	411.089	363.692	ANKRD54
ENSG00000100129	1142.79	1000.75	1155.76	1226.33	789.036	1371.73	1113.37	1055.26	EIF3L
ENSG00000100138	1081.31	993.835	1006.33	915.884	1009.33	957.953	1080.74	931.271	SNU13
ENSG00000100139	676.271	1111.43	933.687	714.809	804.923	875.59	800.972	756.773	MICALL1
ENSG00000100147	24.1095	9.22352	19.813	16.5721	11.6502	9.80504	17.1287	18.3683	CCDC134
ENSG00000100150	66.3011	71.4823	98.2394	110.481	91.0833	85.3039	75.8558	100.107	DEPDC5
ENSG00000100151	347.176	250.188	310.403	266.258	261.6	165.705	292.82	274.606	PICK1
ENSG00000100154	226.629	196	255.092	299.402	189.58	269.639	284.663	232.359	TTC28
ENSG00000100162	247.122	141.812	220.419	159.092	184.285	154.92	169.656	194.704	CENPM
ENSG00000100196	658.189	703.294	679.42	599.91	578.273	409.851	645.182	519.822	KDELR3
ENSG00000100201	2472.43	2526.09	2341.23	2691.31	2348.04	3154.28	2509.77	2738.71	DDX17
ENSG00000100207	446.025	410.447	515.138	422.036	542.264	600.069	477.157	567.579	TCF20
ENSG00000100209	97.6434	88.7764	85.8563	77.3364	90.0242	113.738	101.141	73.4731	HSCB
ENSG00000100211	391.779	342.423	395.434	353.538	449.062	388.28	447.794	373.794	CBY1
ENSG00000100216	1031.89	940.799	949.372	863.958	916.129	815.779	896.403	952.395	TOMM22
ENSG00000100219	787.174	779.388	756.196	940.19	795.391	1030.51	834.413	777.896	XBP1
ENSG00000100220	967.996	1012.28	1028.62	946.819	781.622	853.039	911.085	939.537	RTCB
ENSG00000100221	638.901	792.07	726.476	767.84	802.804	941.284	735.719	770.549	JOSD1
ENSG00000100225	764.27	793.223	805.728	732.486	748.79	807.935	778.133	736.567	FBXO7
ENSG00000100226	229.04	372.4	249.313	304.926	341.033	357.884	254.484	323.281	GTPBP1
ENSG00000100227	652.161	664.094	716.57	703.761	703.248	754.008	621.528	639.216	POLDIP3
ENSG00000100228	71.123	50.7294	90.8095	62.9739	110.147	74.5183	72.5932	88.1677	RAB36
ENSG00000100234	949.913	1714.42	1841.78	1780.95	1139.6	1302.11	1119.08	1137	TIMP3
ENSG00000100239	716.051	1232.49	760.323	734.696	1009.33	881.473	748.77	667.686	PPP6R2
ENSG00000100241	1133.15	2151.39	1348.11	1343.44	2058.91	2036.51	1370.3	1389.56	SBF1
ENSG00000100242	916.16	1144.87	1206.94	1076.08	1056.99	988.348	1008.15	1165.47	SUN2
ENSG00000100243	3477.79	4250.89	3818.95	3497.82	4133.7	3358.23	3509.76	3222.71	CYB5R3
ENSG00000100246	206.136	155.647	178.317	176.769	208.644	188.257	224.305	169.906	DNAL4
ENSG00000100258	1723.83	3122.16	1782.34	2344.4	2503.73	1700.19	1507.33	1583.34	LMF2
ENSG00000100263	329.094	425.435	312.054	343.595	300.787	230.418	305.87	281.953	RHBDD3
ENSG00000100266	746.188	780.541	827.192	821.976	741.376	835.389	734.088	889.024	PACSIN2
ENSG00000100271	59.0682	64.5647	33.8472	47.5066	67.783	50.0057	83.1966	62.4521	TTLL1
ENSG00000100276	122.958	70.3294	131.261	90.5941	39.187	38.2397	141.924	131.333	RASL10A
ENSG00000100280	1183.78	1344.33	1361.32	1161.15	1036.87	1118.76	1139.47	1290.37	AP1B1
ENSG00000100281	438.792	403.529	431.758	464.018	494.604	466.72	473.079	481.249	HMGXB4
ENSG00000100284	1049.97	1024.96	880.027	1014.21	969.084	773.618	830.335	767.794	TOM1
ENSG00000100288	19.2876	40.3529	19.813	37.5634	45.5417	15.6881	28.5479	21.1235	CHKB
ENSG00000100290	34.9587	43.8117	14.8597	26.5153	39.187	23.5321	35.0731	39.4918	BIK
ENSG00000100292	1066.84	1294.75	1095.49	1442.88	839.873	713.807	1078.29	793.509	HMOX1
ENSG00000100294	425.532	402.376	412.77	327.023	367.511	333.371	345.837	348.079	MCAT
ENSG00000100296	431.56	330.894	448.269	380.053	370.688	356.903	421.693	378.386	THOC5
ENSG00000100297	818.517	764.399	1107.88	837.443	892.829	780.481	756.926	962.497	MCM5
ENSG00000100299	268.821	338.964	278.207	343.595	254.186	243.165	233.277	243.38	ARSA
ENSG00000100300	2173.47	1940.4	1935.89	1438.46	1884.15	1478.6	1638.65	1461.2	TSPO
ENSG00000100304	648.545	679.082	917.176	667.303	640.761	791.267	725.116	789.835	TTLL12
ENSG00000100307	100.054	122.212	98.2394	89.4893	83.6696	103.933	86.4593	87.2493	CBX7
ENSG00000100311	18.0821	109.529	47.8814	66.2883	54.0145	42.1617	14.6818	13.7762	PDGFB
ENSG00000100316	33325.3	29974.1	30579.7	31860.4	29732.4	26022.6	29820.3	26983	RPL3
ENSG00000100319	224.218	220.212	200.606	161.302	186.403	134.329	216.148	200.214	ZMAT5
ENSG00000100320	1516.49	1702.89	1724.56	1851.65	1650.09	2141.42	1517.12	1637.53	RBFOX2
ENSG00000100321	343.56	276.706	270.777	298.298	196.994	201.984	267.534	270.014	SYNGR1
ENSG00000100324	394.19	358.564	343.425	395.52	400.343	378.475	372.754	336.139	TAB1
ENSG00000100325	822.133	902.752	876.725	809.823	863.174	797.15	869.487	806.367	ASCC2
ENSG00000100330	103.671	91.0823	96.5883	95.0133	101.674	128.446	105.219	106.536	MTMR3
ENSG00000100335	394.19	470.4	473.035	441.922	425.762	439.266	411.905	398.591	MIEF1
ENSG00000100342	1023.45	1769.76	1183	1335.71	1238.1	880.493	1104.39	884.432	APOL1
ENSG00000100345	22632.8	27351.2	30757.2	31329	25250.2	24691.1	26468	29763	MYH9
ENSG00000100347	796.818	740.188	861.039	691.608	727.608	625.562	782.212	720.036	SAMM50
ENSG00000100348	876.379	643.341	722.348	779.993	699.012	604.971	738.982	731.975	TXN2
ENSG00000100350	254.355	167.176	353.332	271.782	224.531	255.912	274.875	289.3	FOXRED2
ENSG00000100353	3347.6	3057.6	2998.36	3197.31	2957.03	2661.09	3036.68	2911.37	EIF3D
ENSG00000100354	541.258	536.117	495.325	498.267	612.165	396.124	594.611	536.353	TNRC6B
ENSG00000100359	590.682	630.658	554.764	490.534	576.155	560.848	551.382	476.657	SGSM3
ENSG00000100360	197.698	191.388	152.725	149.149	226.649	194.14	216.148	198.377	IFT27
ENSG00000100364	1143.99	1330.49	1177.22	967.81	1191.5	1139.35	1100.32	1100.26	KIAA0930
ENSG00000100372	254.355	208.682	230.326	206.599	213.94	236.301	268.35	277.361	SLC25A17
ENSG00000100376	90.4105	70.3294	86.6818	82.8604	82.6105	117.66	92.1688	75.3099	FAM118A
ENSG00000100379	423.121	353.953	449.094	315.974	342.092	300.034	396.408	342.568	KCTD17
ENSG00000100380	3935.87	3570.66	3669.53	3972.88	3623.21	4312.26	4067.66	3929.89	ST13
ENSG00000100387	1342.9	1303.98	1201.99	1034.1	1373.66	988.348	1325.44	1399.66	RBX1
ENSG00000100393	561.751	564.941	529.172	642.997	570.86	895.2	721.038	658.502	EP300
ENSG00000100395	326.683	343.576	329.391	287.25	323.028	262.775	292.004	308.587	L3MBTL2
ENSG00000100399	34.9587	31.1294	27.2429	15.4673	29.655	18.6296	23.6539	22.9603	CHADL
ENSG00000100401	2995.6	2710.56	3150.26	2595.19	2483.61	2635.6	2544.02	3140.06	RANGAP1
ENSG00000100403	1367.01	1617.58	1760.88	1731.23	1658.56	2010.03	1475.52	1609.98	ZC3H7B
ENSG00000100410	462.902	367.788	421.026	365.691	406.698	416.714	445.347	509.719	PHF5A
ENSG00000100412	606.353	589.153	710.791	572.289	585.687	601.049	646.813	630.032	ACO2
ENSG00000100413	675.065	766.705	707.489	517.049	723.371	560.848	648.444	633.705	POLR3H
ENSG00000100416	419.505	344.729	375.621	348.014	357.979	350.04	386.62	446.349	TRMU
ENSG00000100417	593.093	540.729	553.938	531.412	407.757	483.389	537.516	436.246	PMM1
ENSG00000100418	478.573	479.623	492.848	414.302	466.008	452.993	467.369	453.696	DESI1
ENSG00000100422	853.475	601.835	787.566	749.058	744.553	860.883	876.827	928.516	CERK
ENSG00000100425	274.848	280.165	316.182	323.708	379.161	446.129	385.804	382.06	BRD1
ENSG00000100426	178.41	176.4	208.036	230.904	221.354	289.249	238.986	228.685	ZBED4
ENSG00000100429	85.5886	123.365	69.3454	117.109	140.861	79.4208	97.0628	61.5337	HDAC10
ENSG00000100439	529.203	423.129	422.677	814.242	597.337	640.269	536.7	501.454	ABHD4
ENSG00000100441	534.025	582.235	567.972	648.521	491.426	753.027	528.543	548.293	KHNYN
ENSG00000100442	1323.61	1048.02	1194.56	1290.41	1130.07	1090.32	1376.82	1474.05	FKBP3
ENSG00000100445	148.273	187.929	190.7	211.018	159.925	188.257	169.656	212.153	SDR39U1
ENSG00000100461	916.16	1000.75	927.908	1077.19	938.37	1165.82	991.835	993.723	RBM23
ENSG00000100462	1277.8	1534.56	1562.75	1751.12	1137.48	1580.57	1243.06	1401.5	PRMT5
ENSG00000100473	57.8627	56.4941	65.2177	74.022	58.251	93.1479	47.3079	73.4731	COCH
ENSG00000100478	301.368	222.517	316.182	313.765	230.886	311.8	278.953	288.382	AP4S1
ENSG00000100479	50.6299	50.7294	63.5667	58.5547	45.5417	61.7718	48.1235	75.3099	POLE2
ENSG00000100483	74.7394	87.6235	71.8221	74.022	65.6647	64.7133	95.4314	90.9229	VCPKMT
ENSG00000100485	260.382	300.917	254.267	296.088	253.127	398.085	318.105	322.363	SOS 2
ENSG00000100503	1135.56	916.588	1013.76	1220.81	969.084	1529.59	1225.93	1510.79	NIN
ENSG00000100504	1890.18	1655.62	1636.22	1928.99	1463.69	1908.06	1859.69	1640.29	PYGL
ENSG00000100519	1375.45	1121.81	1152.46	1270.53	1142.78	1242.3	1415.16	1531.91	PSMC6
ENSG00000100522	408.656	172.941	484.593	417.617	345.269	306.898	412.721	434.41	GNPNAT1
ENSG00000100523	125.369	97.9999	122.18	136.996	117.561	151.978	155.79	136.844	DDHD1
ENSG00000100526	834.188	486.541	693.454	636.368	571.919	597.127	746.323	1019.44	CDKN3
ENSG00000100528	1035.5	785.152	884.98	1137.95	773.149	1052.08	1029.35	1106.69	CNIH1
ENSG00000100532	106.082	88.7764	84.2052	114.9	102.734	111.777	111.745	142.354	CGRRF1
ENSG00000100554	1206.68	1122.96	1253.17	1256.16	1118.42	1338.39	1185.96	1418.95	ATP6V1D
ENSG00000100558	94.027	55.3411	80.903	72.9172	67.783	41.1812	92.9845	85.4124	PLEK2
ENSG00000100564	81.9722	86.4705	84.2052	127.053	93.2016	115.699	95.4314	83.5756	PIGH
ENSG00000100567	1058.41	902.752	948.547	1025.26	941.548	855.98	1098.69	1177.41	PSMA3
ENSG00000100568	1725.03	1778.99	1630.44	1815.2	1538.88	2078.67	1678.61	1556.71	VTI1B
ENSG00000100575	544.874	445.035	384.702	529.202	441.648	402.007	398.855	432.573	TIMM9
ENSG00000100577	306.19	433.506	250.964	246.372	330.442	328.469	375.201	248.89	GSTZ1
ENSG00000100578	144.657	86.4705	181.619	171.245	127.093	187.276	194.126	196.54	KIAA0586
ENSG00000100580	348.382	280.165	340.948	328.127	264.777	438.285	371.938	410.531	TMED8
ENSG00000100583	25.315	23.0588	14.0342	12.1529	19.064	33.3371	26.9166	13.7762	SAMD15
ENSG00000100591	2646.02	2200.96	2491.48	2253.8	2595.88	2645.4	2614.98	2706.56	AHSA1
ENSG00000100592	347.176	330.894	286.463	382.263	273.25	310.82	261.009	295.729	DAAM1
ENSG00000100593	33.7533	12.6823	18.9874	22.0961	6.35465	16.6686	13.0505	28.4708	ISM2
ENSG00000100596	1715.39	1753.62	1806.28	1966.55	1447.8	1863.94	1805.04	2085.72	SPTLC2
ENSG00000100599	295.341	419.67	321.135	369.005	345.269	367.689	256.115	286.545	RIN3
ENSG00000100600	353.204	338.964	398.736	391.101	355.861	285.327	365.413	312.261	LGMN
ENSG00000100601	150.684	121.059	140.342	160.197	128.152	197.081	159.868	160.722	ALKBH1
ENSG00000100603	1417.64	1316.66	1283.72	1459.45	1363.07	1275.64	1244.69	1295.88	SNW1
ENSG00000100605	2089.09	2627.55	2667.32	2190.83	1966.76	2653.24	2168.82	1935.1	ITPK1
ENSG00000100612	737.75	602.988	577.879	800.984	606.869	564.77	641.919	627.276	DHRS7
ENSG00000100614	860.708	840.494	802.426	872.797	617.46	1029.53	968.181	911.066	PPM1A
ENSG00000100625	84.3832	78.3999	77.6009	113.795	77.3149	137.271	79.1184	77.1467	SIX4
ENSG00000100626	63.8901	33.4353	38.8004	62.9739	44.4826	56.8692	41.5983	64.2889	GALNT16
ENSG00000100629	78.3558	47.2706	70.9965	77.3364	47.6599	89.2259	62.8053	93.6782	CEP128
ENSG00000100632	3952.75	3401.17	3780.15	3744.19	4254.44	3999.48	4048.09	4074.08	ERH
ENSG00000100644	1899.83	1675.22	2017.62	2303.52	1699.87	2758.16	2100.31	2499.92	HIF1A
ENSG00000100647	236.273	300.917	307.101	363.481	391.87	349.059	329.524	333.384	SUSD6
ENSG00000100650	1206.68	1384.68	1219.32	1389.85	1698.81	1047.18	1309.94	1124.14	SRSF5
ENSG00000100664	3159.55	2846.61	3032.21	2842.67	2963.39	3781.8	3349.07	3704.88	EIF5
ENSG00000100697	575.011	513.058	615.854	697.132	615.342	786.364	560.354	582.274	DICER1
ENSG00000100711	831.777	947.717	866.818	926.932	813.395	871.668	858.067	789.835	ZFYVE21
ENSG00000100714	1077.69	968.47	1358.01	1215.29	1026.28	1356.04	1158.23	1362.93	MTHFD1
ENSG00000100722	693.147	665.247	761.149	776.678	675.711	1041.3	826.257	936.782	ZC3H14
ENSG00000100726	795.613	852.023	885.805	752.373	883.297	601.049	715.328	679.626	TELO2
ENSG00000100731	687.12	703.294	696.757	768.945	612.165	920.693	706.356	783.407	PCNX1
ENSG00000100739	97.6434	28.8235	63.5667	118.214	31.7733	61.7718	87.2749	51.4311	BDKRB1
ENSG00000100744	338.738	380.47	383.877	402.149	316.674	464.759	435.559	452.778	GSKIP
ENSG00000100749	226.629	167.176	205.56	255.21	160.985	183.354	225.936	282.871	VRK1
ENSG00000100764	1590.02	1466.54	1444.7	1576.56	1281.52	1363.88	1468.99	1470.38	PSMC1
ENSG00000100767	600.326	659.482	481.29	745.744	513.668	553.985	827.888	773.304	PAPLN
ENSG00000100784	61.4792	44.9647	43.7537	59.6595	38.1279	63.7328	72.5932	91.8413	RPS6KA5
ENSG00000100796	830.571	838.188	791.694	925.827	773.149	1155.03	980.415	969.844	PPP4R3A
ENSG00000100802	130.191	107.223	104.018	129.262	87.906	119.621	112.56	101.944	C14orf93
ENSG00000100804	2234.95	2116.8	2183.56	2100.24	1951.94	1787.46	2127.22	2092.15	PSMB5
ENSG00000100811	2538.73	2373.9	2248.77	2557.63	2301.44	2741.49	2480.4	2479.72	YY1
ENSG00000100813	2050.51	2094.89	2068.81	2240.55	2155.29	2192.41	2112.54	2124.29	ACIN1
ENSG00000100814	215.78	171.788	208.862	270.677	205.467	238.262	218.595	222.256	CCNB1IP1
ENSG00000100815	611.175	460.023	503.58	584.442	462.831	647.133	496.733	604.316	TRIP11
ENSG00000100823	3562.18	3118.7	3462.32	4098.83	3183.68	3585.7	3513.83	3371.5	APEX1
ENSG00000100836	2318.13	2168.68	2081.19	2099.13	2162.7	1822.76	2473.06	2106.84	PABPN1
ENSG00000100852	730.517	756.329	733.906	903.731	660.884	990.309	730.01	836.675	ARHGAP5
ENSG00000100865	776.325	774.776	741.336	749.058	661.943	603.991	693.305	683.3	CINP
ENSG00000100883	847.448	860.094	951.849	1035.2	885.415	952.069	917.61	1092.91	SRP54
ENSG00000100888	1110.24	1226.73	1224.28	1258.37	1180.91	1333.49	1207.98	1216.9	CHD8
ENSG00000100889	151.89	189.082	159.329	185.607	126.034	172.569	178.628	167.151	PCK2
ENSG00000100890	59.0682	84.1646	89.1584	62.9739	78.374	65.6938	64.4366	72.5547	KIAA0391
ENSG00000100897	696.764	936.188	865.993	880.53	699.012	955.991	783.843	745.752	DCAF11
ENSG00000100902	953.53	817.435	935.338	1132.43	805.982	943.245	1060.35	1108.52	PSMA6
ENSG00000100906	1095.78	1022.66	927.908	1620.75	1598.2	1314.86	1298.52	1204.96	NFKBIA
ENSG00000100908	561.751	630.658	511.835	546.879	587.805	480.447	483.682	528.088	EMC9
ENSG00000100911	2412.15	2541.08	2486.53	2729.98	2593.76	2051.21	2322.98	2228.07	PSME2
ENSG00000100916	121.753	104.918	105.669	120.424	123.916	163.744	136.214	135.007	BRMS1L
ENSG00000100918	713.641	374.706	685.199	575.604	475.54	647.133	563.616	715.444	REC8
ENSG00000100926	202.52	264.023	253.441	304.926	222.413	268.658	221.042	224.093	TM9SF1
ENSG00000100934	1538.18	1735.18	1822.79	2243.86	1356.72	2302.22	1778.94	1980.1	SEC23A
ENSG00000100938	1236.82	1122.96	1203.64	1536.78	1194.67	1420.75	1231.64	1234.35	GMPR2
ENSG00000100941	1369.42	1321.27	1379.48	1364.44	1518.76	1568.81	1411.08	1554.87	PNN
ENSG00000100949	353.204	379.317	300.497	320.394	320.91	261.795	335.234	294.811	RABGGTA
ENSG00000100968	79.5613	19.6	35.4983	45.297	31.7733	51.9667	51.3862	44.0838	NFATC4
ENSG00000100979	2508.59	1136.8	1507.44	1567.72	1257.16	810.877	1967.36	1578.75	PLTP
ENSG00000100982	747.394	810.517	702.535	849.596	729.726	745.183	707.987	724.628	PCIF1
ENSG00000100983	1702.13	1391.6	1480.2	1404.21	1368.37	1209.94	1548.93	1473.13	GSS
ENSG00000100985	194.081	25.3647	178.317	98.3277	31.7733	64.7133	327.077	255.319	MMP9
ENSG00000100991	1963.72	1931.18	2025.05	1889.22	1867.21	1901.2	1968.99	1985.61	TRPC4AP
ENSG00000100994	6744.63	5861.55	7693.22	5542.81	5869.58	4805.45	6221.8	6529.92	PYGB
ENSG00000100997	2938.95	2754.37	3113.94	2414	2389.35	2398.31	2527.71	2793.81	ABHD12
ENSG00000101000	327.889	159.106	212.164	209.913	172.635	243.165	291.188	333.384	PROCR
ENSG00000101003	413.478	367.788	515.138	383.368	391.87	418.675	361.334	469.309	GINS1
ENSG00000101004	166.355	102.612	145.295	166.826	135.566	148.056	194.126	193.785	NINL
ENSG00000101017	15.6712	25.3647	9.90649	29.8298	24.3595	15.6881	9.78784	11.021	CD40
ENSG00000101019	1037.91	852.023	1008.81	919.198	830.341	886.376	924.951	877.085	UQCC1
ENSG00000101040	567.778	496.917	638.143	628.634	646.056	477.505	473.895	542.782	ZMYND8
ENSG00000101052	536.436	479.623	523.393	575.604	474.481	558.887	537.516	491.351	IFT52
ENSG00000101057	1187.39	1419.27	1453.78	1125.8	1331.3	1176.6	1127.23	1298.64	MYBL2
ENSG00000101079	672.654	581.082	654.654	628.634	581.451	587.322	696.568	654.829	NDRG3
ENSG00000101084	931.831	945.411	930.385	734.696	797.509	916.771	889.878	941.374	C20orf24
ENSG00000101096	16.8766	78.3999	33.8472	99.4325	57.1919	49.0252	59.5427	45.0023	NFATC2
ENSG00000101104	98.8489	71.4823	68.5199	78.4412	100.615	92.1674	91.3532	89.0861	PABPC1L
ENSG00000101109	1010.19	637.576	989.824	818.661	688.421	928.537	786.29	911.984	STK4
ENSG00000101115	49.4244	32.2823	15.6853	22.0961	41.3052	32.3566	30.9948	34.8997	SALL4
ENSG00000101126	1287.45	1224.42	1187.95	1285.99	1151.25	1560.96	1413.53	1458.44	ADNP
ENSG00000101132	800.435	582.235	591.087	677.246	704.307	503.979	807.497	929.434	PFDN4
ENSG00000101134	156.712	64.5647	160.155	194.446	121.798	149.037	190.047	116.638	DOK5
ENSG00000101138	766.681	661.788	863.516	777.783	578.273	554.965	691.674	724.628	CSTF1
ENSG00000101146	719.668	650.258	676.944	631.949	639.702	641.25	680.255	723.71	RAE1
ENSG00000101150	5754.93	4177.1	5580.66	4845.68	5535.96	4363.24	5247.1	5170.67	TPD52L2
ENSG00000101152	1668.38	1568	2006.06	1740.07	1906.4	1444.28	1768.34	1633.86	DNAJC5
ENSG00000101158	1160.87	807.058	1319.21	1172.2	1251.87	1035.41	1241.42	1317.92	NELFCD
ENSG00000101160	6824.19	8076.35	6956.01	6424.45	7954.97	4282.84	6227.51	5808.05	CTSZ
ENSG00000101161	4303.54	3169.43	4110.37	4229.2	3821.26	2477.73	3774.84	3605.69	PRPF6
ENSG00000101166	1332.05	850.87	1295.27	1177.72	1259.28	1371.73	1479.6	1485.99	PRELID3B
ENSG00000101181	873.969	691.764	904.793	848.491	982.853	592.224	796.078	762.283	MTG2
ENSG00000101182	8091.14	6009.13	7415.01	6699.54	7613.93	4925.07	7506.46	7982.85	PSMA7
ENSG00000101187	103.671	57.647	70.171	199.97	175.812	88.2454	96.2471	110.21	SLCO4A1
ENSG00000101189	998.132	877.388	983.219	1002.06	1156.55	887.356	1044.85	994.642	MRGBP
ENSG00000101190	395.395	300.917	415.247	370.11	402.461	382.397	433.928	369.202	TCFL5
ENSG00000101191	1075.28	732.117	1041.83	988.801	1049.58	1016.78	1177.8	1277.51	DIDO1
ENSG00000101193	875.174	759.788	986.521	1052.88	990.267	849.117	961.655	999.234	GID8
ENSG00000101199	2143.33	1948.47	2313.99	2098.03	2113.98	1176.6	2021.19	1800.09	ARFGAP1
ENSG00000101210	37.3697	6.91764	25.5918	18.7817	9.53198	8.82454	19.5757	28.4708	EEF1A2
ENSG00000101213	55.4518	71.4823	68.5199	53.0307	77.3149	57.8497	68.5149	48.6759	PTK6
ENSG00000101216	420.71	371.247	406.992	360.167	375.984	368.67	390.698	416.96	GMEB2
ENSG00000101220	1407.99	1264.78	1379.48	1116.96	1137.48	1024.63	1181.88	1242.61	C20orf27
ENSG00000101222	34.9587	31.1294	47.0558	20.9913	36.0097	21.5711	35.0731	31.2261	SPEF1
ENSG00000101224	2896.75	2266.68	2825.83	2552.1	2220.95	2661.09	2358.87	2716.67	CDC25B
ENSG00000101236	1040.32	1036.49	931.21	1056.19	1259.28	1168.76	890.694	1111.28	RNF24
ENSG00000101246	1269.36	997.293	1257.3	1139.05	1160.78	654.977	1044.85	1028.62	ARFRP1
ENSG00000101247	183.232	166.023	189.049	159.092	162.044	147.076	190.863	202.969	NDUFAF5
ENSG00000101255	318.245	205.223	165.108	254.105	198.053	152.959	252.853	225.93	TRIB3
ENSG00000101265	335.122	931.576	466.431	504.896	696.894	581.439	420.877	367.365	RASSF2
ENSG00000101266	1671.99	1529.95	1631.27	1615.23	1833.32	1994.35	1778.94	1897.44	CSNK2A1
ENSG00000101290	1458.62	1674.07	1425.71	1519.11	1688.22	1566.85	1576.66	1718.35	CDS2
ENSG00000101294	4113.08	4581.79	3520.93	3610.51	3979.07	2685.6	3631.29	3477.11	HM13
ENSG00000101298	315.834	329.741	337.646	213.228	291.255	307.878	318.105	290.219	SNPH
ENSG00000101306	10.8493	31.1294	7.42987	13.2577	18.0048	6.86353	12.2348	8.26572	MYLK2
ENSG00000101307	103.671	63.4117	80.903	124.843	84.7287	83.3428	74.2245	75.3099	SIRPB1
ENSG00000101310	1146.41	1026.12	1472.77	1130.22	977.557	1457.03	1125.6	1396.91	SEC23B
ENSG00000101311	77.1503	31.1294	96.5883	41.9826	52.9554	67.6548	70.1462	79.902	FERMT1
ENSG00000101323	3.61642	21.9059	28.8939	15.4673	36.0097	10.7855	18.76	21.1235	HAO1
ENSG00000101333	130.191	170.635	113.925	118.214	115.443	210.808	117.454	150.62	PLCB4
ENSG00000101335	3606.78	6826.56	3595.23	4060.16	4184.54	2248.3	4915.13	2497.17	MYL9
ENSG00000101337	1119.89	1268.23	1277.11	1334.61	1383.2	1299.17	1274.05	1298.64	TM9SF4
ENSG00000101343	673.86	563.788	605.947	570.08	531.673	625.562	624.79	719.118	CRNKL1
ENSG00000101346	2307.28	2584.89	2785.38	2402.95	2901.96	2602.26	2294.43	2562.37	POFUT1
ENSG00000101347	470.135	634.117	573.751	571.185	749.849	820.682	517.124	588.703	SAMHD1
ENSG00000101350	2011.94	2013.03	2006.89	1848.34	1955.11	1878.65	1913.52	1909.38	KIF3B
ENSG00000101353	36.1642	38.047	28.8939	27.6201	19.064	41.1812	39.967	35.8181	MROH8
ENSG00000101361	2064.98	1802.05	1864.9	1646.16	1903.22	1579.59	1770.78	1850.6	NOP56
ENSG00000101363	1547.83	1940.4	1493.4	1527.95	1480.63	1286.42	1410.26	1449.26	MANBAL
ENSG00000101365	1896.21	1687.9	1551.19	1538.99	1448.86	1271.71	1601.94	1545.69	IDH3B
ENSG00000101367	2319.33	2170.99	2473.32	2384.17	2260.14	2615	2625.59	2926.98	MAPRE1
ENSG00000101384	85.5886	160.259	170.061	185.607	98.4971	139.232	196.572	133.17	JAG1
ENSG00000101391	466.518	403.529	456.524	386.682	403.52	321.605	463.291	428.899	CDK5RAP1
ENSG00000101400	990.9	1286.68	1019.54	924.722	776.327	971.68	822.994	760.446	SNTA1
ENSG00000101407	472.546	328.588	500.278	353.538	339.974	441.227	403.748	455.533	TTI1
ENSG00000101412	523.176	523.435	596.866	408.778	540.145	545.16	431.481	590.54	E2F1
ENSG00000101413	505.094	556.87	596.041	601.014	492.486	691.255	480.42	531.761	RPRD1B
ENSG00000101417	370.08	526.894	378.923	306.031	339.974	324.547	320.552	298.484	PXMP4
ENSG00000101421	3730.94	4468.8	3941.13	4144.13	4151.71	3761.21	3999.96	3500.99	CHMP4B
ENSG00000101439	5927.31	7723.55	5673.12	5178.22	5928.89	3804.36	5698.97	4777.59	CST3
ENSG00000101442	161.533	123.365	165.108	122.633	140.861	123.544	133.767	189.193	ACTR5
ENSG00000101444	3295.77	2642.54	3530.01	2876.91	2901.96	3164.09	3170.44	3212.61	AHCY
ENSG00000101447	653.367	541.882	855.26	817.556	550.737	947.167	670.467	1054.34	FAM83D
ENSG00000101452	166.355	162.565	197.304	171.245	191.699	166.686	172.103	187.356	DHX35
ENSG00000101457	1954.07	1642.94	1674.2	1859.39	1787.78	1491.35	1842.56	1620.08	DNTTIP1
ENSG00000101460	744.983	741.341	667.037	723.648	641.82	412.792	588.086	466.554	MAP1LC3A
ENSG00000101464	751.01	581.082	565.496	526.992	577.214	398.085	610.924	649.318	PIGU
ENSG00000101470	19.2876	16.1412	19.813	27.6201	16.9457	6.86353	16.3131	15.613	TNNC2
ENSG00000101473	503.888	448.494	436.711	370.11	401.402	347.098	390.698	390.326	ACOT8
ENSG00000101474	2823.22	2807.41	3010.75	2627.23	2566.22	2259.08	2553	2904.94	APMAP
ENSG00000101489	14.4657	20.7529	14.8597	9.94325	8.47287	10.7855	7.34088	4.59207	CELF4
[truncated: 12,389 more rows]

## Sheet: Table S4 H28-pyrimethamine
ID	H28-Pyr0-A	H28-Pyr0-B	H28-Pyr10-A	H28-Pyr10-B	Gene.name
ENSG00000000003	420.071	310.312	527.484	327.119	TSPAN6
ENSG00000000419	1471.63	1347.25	1376.19	1062.45	DPM1
ENSG00000000457	219.047	193.561	197.468	203.419	SCYL3
ENSG00000000460	463.049	456.251	428.073	441.198	C1orf112
ENSG00000000971	11.7842	23.043	10.1439	13.7445	CFH
ENSG00000001036	1816.15	1831.15	1853.63	1866.5	FUCA2
ENSG00000001084	854.006	964.733	718.19	826.044	GCLC
ENSG00000001167	778.448	815.722	659.355	801.304	NFYA
ENSG00000001461	44.3639	69.129	29.7555	37.1101	NIPAL3
ENSG00000001497	1774.56	1762.02	1544.58	1447.3	LAS1L
ENSG00000001561	529.594	531.525	526.131	645.991	ENPP4
ENSG00000001617	349.366	385.586	427.397	481.057	SEMA3F
ENSG00000001629	2860.78	2732.9	2475.79	2460.27	ANKIB1
ENSG00000001630	303.616	317.993	214.375	213.04	CYP51A1
ENSG00000001631	795.778	671.319	654.621	699.595	KRIT1
ENSG00000002016	155.967	187.416	185.972	195.172	RAD52
ENSG00000002079	6.23868	3.0724	16.2303	15.1189	MYH16
ENSG00000002330	652.288	577.611	670.851	580.018	BAD
ENSG00000002549	2697.88	2190.62	2367.59	2197.75	LAP3
ENSG00000002586	3691.91	3301.29	3750.55	3315.17	CD99
ENSG00000002587	37.4321	47.6222	39.2232	37.1101	HS3ST1
ENSG00000002746	58.2277	73.7376	61.5398	67.348	HECW1
ENSG00000002822	750.028	792.679	966.377	842.538	MAD1L1
ENSG00000002834	9362.18	9349.31	8671.7	8402.01	LASP1
ENSG00000002919	465.128	414.774	467.297	379.348	SNX11
ENSG00000003056	3822.92	3789.8	3491.54	3345.41	M6PR
ENSG00000003096	153.194	142.867	172.447	108.582	KLHL13
ENSG00000003137	280.741	454.715	447.009	628.124	CYP26B1
ENSG00000003147	53.3754	38.405	80.4751	63.2247	ICA1
ENSG00000003249	518.504	680.536	628.923	784.811	DBNDD1
ENSG00000003393	1563.14	1462.46	1139.5	1330.47	ALS2
ENSG00000003400	113.683	87.5633	238.72	155.313	CASP10
ENSG00000003402	2337.42	2354.99	3305.57	3195.6	CFLAR
ENSG00000003436	52.6822	121.36	35.1656	42.6079	TFPI
ENSG00000003509	626.641	491.584	568.736	511.295	NDUFAF7
ENSG00000003756	1606.81	1775.85	1750.16	2104.28	RBM5
ENSG00000003987	40.2048	30.724	33.8131	28.8634	MTMR7
ENSG00000003989	42.2844	58.3756	77.0938	92.0881	SLC7A2
ENSG00000004059	1988.75	1789.67	2118.73	1781.29	ARF5
ENSG00000004139	9.70461	18.4344	21.6404	16.4934	SARM1
ENSG00000004142	2871.18	3017.09	2826.77	2669.18	POLDIP2
ENSG00000004399	863.017	1046.15	953.529	1150.41	PLXND1
ENSG00000004455	5243.96	4769.9	4114.37	3834.72	AK2
ENSG00000004478	5127.5	5004.94	3950.72	3669.78	FKBP4
ENSG00000004487	1771.78	1570	1375.52	1220.51	KDM1A
ENSG00000004534	1708.7	1927.93	1476.28	1569.62	RBM6
ENSG00000004660	1443.91	1937.15	929.183	1362.08	CAMKK1
ENSG00000004700	1000.96	932.473	1301.13	1143.54	RECQL
ENSG00000004766	552.47	514.627	430.778	420.582	VPS50
ENSG00000004777	256.479	453.179	248.188	465.938	ARHGAP33
ENSG00000004779	1213.77	989.312	1002.22	788.934	NDUFAB1
ENSG00000004838	20.1024	29.1878	14.8777	32.9868	ZMYND10
ENSG00000004848	96.3529	93.7081	71.0074	75.5947	ARX
ENSG00000004864	1314.28	1353.39	1011.69	1106.43	SLC25A13
ENSG00000004866	120.614	159.765	124.432	108.582	ST7
ENSG00000004897	3210.15	3199.9	2545.45	2300.83	CDC27
ENSG00000004961	1023.84	961.661	1133.41	784.811	HCCS
ENSG00000004975	1459.85	1311.91	1407.98	1243.88	DVL2
ENSG00000005007	2120.46	2743.65	2418.99	2513.87	UPF1
ENSG00000005020	685.561	536.133	555.887	432.952	SKAP2
ENSG00000005022	12903.7	10272.6	13219.6	9885.04	SLC25A5
ENSG00000005059	499.787	467.004	575.498	470.062	MCUB
ENSG00000005075	1145.84	973.95	1094.87	865.903	POLR2J
ENSG00000005100	1028.69	1195.16	940.003	1105.06	DHX33
ENSG00000005108	15.2501	21.5068	12.849	19.2423	THSD7A
ENSG00000005156	399.969	454.715	390.203	355.983	LIG3
ENSG00000005175	901.142	921.719	935.269	738.08	RPAP3
ENSG00000005187	143.49	86.0271	65.5974	56.3524	ACSM3
ENSG00000005189	216.274	236.575	323.253	268.018	REXO5
ENSG00000005194	1204.06	1236.64	1072.55	1018.47	CIAPIN1
ENSG00000005206	594.061	1093.77	651.916	1171.03	SPPL2B
ENSG00000005238	472.753	371.76	361.8	401.339	FAM214B
ENSG00000005249	1070.97	1050.76	669.499	692.723	PRKAR2B
ENSG00000005302	576.731	528.452	586.319	498.925	MSL3
ENSG00000005339	1260.21	1457.85	1136.8	1305.73	CREBBP
ENSG00000005436	499.094	470.077	515.311	401.339	GCFC2
ENSG00000005448	357.684	350.253	476.088	453.568	WDR54
ENSG00000005469	140.717	116.751	179.886	147.066	CROT
ENSG00000005483	1693.45	1679.07	1159.11	1293.36	KMT2E
ENSG00000005486	743.789	892.532	810.161	912.635	RHBDD2
ENSG00000005513	273.809	202.778	179.886	181.427	SOX8
ENSG00000005700	3077.05	2848.11	2506.22	2545.48	IBTK
ENSG00000005801	449.185	425.527	573.47	507.172	ZNF195
ENSG00000005810	834.597	943.226	722.247	813.674	MYCBP2
ENSG00000005812	1380.13	1265.83	1411.36	1298.86	FBXL3
ENSG00000005882	785.38	471.613	569.412	456.317	PDK2
ENSG00000005884	12277	17445.1	17091.2	21738.3	ITGA3
ENSG00000005889	550.39	553.032	473.383	453.568	ZFX
ENSG00000005893	6802.24	5522.64	5314.06	4739.1	LAMP2
ENSG00000005961	4.15912	7.68099	18.9353	12.37	ITGA2B
ENSG00000006007	1220.7	1064.59	1123.95	952.494	GDE1
ENSG00000006015	763.892	714.333	712.103	673.48	REX1BD
ENSG00000006016	54.0685	38.405	70.3312	63.2247	CRLF1
ENSG00000006025	395.809	505.409	455.124	648.74	OSBPL7
ENSG00000006042	634.266	589.9	857.499	754.573	TMEM98
ENSG00000006062	736.164	921.719	929.859	989.604	MAP3K14
ENSG00000006118	2748.48	3219.87	2433.19	3209.34	TMEM132A
ENSG00000006125	11610.9	10063.6	10937.2	9790.21	AP2B1
ENSG00000006194	865.79	946.299	823.686	920.881	ZNF263
ENSG00000006210	818.653	823.403	788.521	883.771	CX3CL1
ENSG00000006282	1922.21	2256.68	2473.76	2971.56	SPATA20
ENSG00000006283	63.08	95.2443	59.511	115.454	CACNA1G
ENSG00000006327	3025.76	3198.37	3842.52	3212.09	TNFRSF12A
ENSG00000006432	326.491	353.326	440.246	527.789	MAP3K9
ENSG00000006451	1685.83	1542.34	2139.01	1654.84	RALA
ENSG00000006453	1236.64	1359.54	1622.35	1656.21	BAIAP2L1
ENSG00000006459	103.978	105.998	66.2736	60.4758	KDM7A
ENSG00000006468	22.8752	33.7964	14.2015	20.6167	ETV1
ENSG00000006530	569.799	605.262	601.873	511.295	AGK
ENSG00000006534	2454.57	1778.92	2380.44	2157.89	ALDH3B1
ENSG00000006576	1116.72	1096.85	1423.53	1280.99	PHTF2
ENSG00000006607	867.176	1070.73	762.147	783.436	FARP2
ENSG00000006611	759.732	499.265	632.981	624	USH1C
ENSG00000006625	682.096	686.681	939.327	720.212	GGCT
ENSG00000006634	686.255	689.753	480.822	377.974	DBF4
ENSG00000006652	1214.46	1165.98	2400.73	1697.45	IFRD1
ENSG00000006695	1033.54	874.097	749.298	727.084	COX10
ENSG00000006704	1717.72	1809.64	1567.57	1595.74	GTF2IRD1
ENSG00000006712	1543.73	1417.91	1689.98	1304.35	PAF1
ENSG00000006715	2035.2	1791.21	1905.7	1763.42	VPS41
ENSG00000006740	9.70461	13.8258	10.8202	4.12335	ARHGAP44
ENSG00000006744	2080.25	2176.79	1713.65	1727.68	ELAC2
ENSG00000006756	612.777	563.785	565.354	665.234	ARSD
ENSG00000006757	447.105	344.109	433.484	343.612	PNPLA4
ENSG00000006831	1773.86	1972.48	1512.12	1792.28	ADIPOR2
ENSG00000006837	24.2615	32.2602	35.1656	10.9956	CDKL3
ENSG00000007047	775.676	792.679	834.507	853.533	MARK4
ENSG00000007080	1504.91	1586.89	1305.18	1245.25	CCDC124
ENSG00000007168	3312.05	3481.03	2918.07	2982.56	PAFAH1B1
ENSG00000007202	3601.8	4594.77	3512.5	4150.84	KIAA0100
ENSG00000007237	4.85231	4.6086	55.4534	37.1101	GAS7
ENSG00000007255	407.594	316.457	459.181	377.974	TRAPPC6A
ENSG00000007264	31.1934	12.2896	43.2807	31.6123	MATK
ENSG00000007341	334.809	284.197	347.598	314.749	ST7L
ENSG00000007372	203.104	158.228	177.857	159.436	PAX6
ENSG00000007376	647.436	734.303	613.369	652.864	RPUSD1
ENSG00000007384	461.662	682.072	690.463	865.903	RHBDF1
ENSG00000007392	1276.16	1322.67	1199.69	1213.64	LUC7L
ENSG00000007402	15.9433	26.1154	16.2303	23.3656	CACNA2D2
ENSG00000007516	15.2501	15.362	21.6404	16.4934	BAIAP3
ENSG00000007520	1211	1124.5	1213.21	1098.19	TSR3
ENSG00000007541	583.663	791.142	653.945	824.67	PIGQ
ENSG00000007545	308.468	417.846	340.836	423.331	CRAMP1
ENSG00000007866	108.137	147.475	367.21	316.123	TEAD3
ENSG00000007923	851.926	926.328	710.074	744.952	DNAJC11
ENSG00000007944	83.1824	56.8394	63.5686	39.859	MYLIP
ENSG00000007952	9.70461	13.8258	12.849	2.7489	NOX1
ENSG00000007968	170.524	244.256	421.987	453.568	E2F2
ENSG00000008018	3829.86	3123.09	3325.85	2619.7	PSMB1
ENSG00000008083	171.91	155.156	108.202	159.436	JARID2
ENSG00000008086	754.187	791.142	457.153	514.044	CDKL5
ENSG00000008128	200.331	247.328	190.706	248.775	CDK11A
ENSG00000008130	612.084	781.925	722.247	805.428	NADK
ENSG00000008226	16.6365	10.7534	10.1439	17.8678	DLEC1
ENSG00000008256	433.935	523.844	595.786	555.278	CYTH3
ENSG00000008277	144.183	172.054	116.993	173.181	ADAM22
ENSG00000008282	2379.02	2350.38	2326.34	1997.08	SYPL1
ENSG00000008283	628.027	731.231	546.419	648.74	CYB561
ENSG00000008294	10089.3	8581.21	8687.25	7600.71	SPAG9
ENSG00000008300	70.0118	113.679	154.188	191.049	CELSR3
ENSG00000008311	77.6369	75.2738	90.619	109.956	AASS
ENSG00000008323	4.15912	6.1448	18.2591	13.7445	PLEKHG6
ENSG00000008324	616.243	456.251	553.858	437.075	SS18L2
ENSG00000008382	322.332	281.124	336.102	316.123	MPND
ENSG00000008394	1192.97	1047.69	1136.12	984.106	MGST1
ENSG00000008405	525.435	623.697	630.276	628.124	CRY1
ENSG00000008441	143.49	185.88	144.044	169.057	NFIX
ENSG00000008513	1187.43	1646.81	1892.86	2236.23	ST3GAL1
ENSG00000008516	10.3978	30.724	17.5828	38.4846	MMP25
ENSG00000008517	3477.02	3155.35	4363.24	3135.12	IL32
ENSG00000008710	1577.69	2540.87	1585.16	2523.49	PKD1
ENSG00000008735	20.7956	29.1878	34.4893	34.3612	MAPK8IP2
ENSG00000008838	1549.97	1828.08	1495.21	1764.79	MED24
ENSG00000008853	296.684	365.615	658.679	633.621	RHOBTB2
ENSG00000008869	811.721	758.882	712.103	827.419	HEATR5B
ENSG00000008952	3638.54	3189.15	2782.14	2306.33	SEC62
ENSG00000008988	18003.4	13349.6	17886.4	12117.1	RPS20
ENSG00000009307	17663.1	14775.2	15279.4	12948.7	CSDE1
ENSG00000009335	3008.43	3127.7	2707.07	2840.99	UBE3C
ENSG00000009413	295.297	345.645	700.607	629.498	REV3L
ENSG00000009694	29.1138	26.1154	22.9929	31.6123	TENM1
ENSG00000009724	18.716	19.9706	10.8202	16.4934	MASP2
ENSG00000009780	71.3982	70.6652	64.9211	48.1057	FAM76A
ENSG00000009830	338.968	448.57	310.404	408.212	POMT2
ENSG00000009844	1882.69	1637.59	1756.25	1348.34	VTA1
ENSG00000009950	3.46593	1.5362	18.2591	16.4934	MLXIPL
ENSG00000009954	4824.58	4943.49	4664.17	4627.77	BAZ1B
ENSG00000010017	1253.97	1083.02	1065.79	968.987	RANBP9
ENSG00000010072	254.399	298.023	229.253	200.67	SPRTN
ENSG00000010165	1506.29	1689.82	1420.83	1470.66	METTL13
ENSG00000010219	216.274	231.966	250.217	301.005	DYRK4
ENSG00000010244	4046.82	3932.67	3760.01	3645.04	ZNF207
ENSG00000010256	12010.1	9983.76	12301.2	10368.8	UQCRC1
ENSG00000010270	1810.6	1520.84	1603.42	1315.35	STARD3NL
ENSG00000010278	135.865	153.62	195.44	156.687	CD9
ENSG00000010292	4132.78	3994.12	3495.59	2821.75	NCAPD2
ENSG00000010295	103.978	142.867	167.713	229.533	IFFO1
ENSG00000010310	13.8637	10.7534	12.849	19.2423	GIPR
ENSG00000010318	233.604	218.14	283.354	229.533	PHF7
ENSG00000010319	7.62505	4.6086	23.6691	32.9868	SEMA3G
ENSG00000010322	2777.6	3537.87	3045.2	4117.85	NISCH
ENSG00000010361	105.364	61.448	115.641	92.0881	FUZ
ENSG00000010379	16.6365	9.21719	9.46766	1.37445	SLC6A13
ENSG00000010404	2260.48	2184.47	2109.94	2155.14	IDS
ENSG00000010539	211.422	251.937	244.807	255.648	ZNF200
ENSG00000010626	163.592	119.824	144.044	123.7	LRRC23
ENSG00000010704	261.331	228.894	178.533	140.194	HFE
ENSG00000010803	427.696	529.989	578.203	578.643	SCMH1
ENSG00000010810	80.4096	95.2443	135.929	100.335	FYN
ENSG00000010818	293.911	354.862	461.887	456.317	HIVEP2
ENSG00000011007	669.618	722.014	630.952	575.894	ELOA
ENSG00000011009	867.869	824.939	873.73	893.392	LYPLA2
ENSG00000011021	201.024	261.154	132.547	180.053	CLCN6
ENSG00000011028	3750.14	5393.59	4602.63	6940.97	MRC2
ENSG00000011052	30.5002	30.724	29.7555	28.8634	NME1-NME2
ENSG00000011105	942.734	844.909	880.492	912.635	TSPAN9
ENSG00000011114	716.062	841.837	623.513	721.586	BTBD7
ENSG00000011132	262.718	333.355	370.591	376.599	APBA3
ENSG00000011143	244.695	211.995	249.54	270.767	MKS1
ENSG00000011198	409.673	410.165	616.75	529.163	ABHD5
ENSG00000011201	290.445	250.4	184.619	186.925	ANOS1
ENSG00000011243	980.166	881.778	1072.55	905.762	AKAP8L
ENSG00000011258	1043.94	1000.07	773.643	775.19	MBTD1
ENSG00000011260	1943.69	1852.66	1318.71	1154.54	UTP18
ENSG00000011275	1375.98	1414.84	1286.25	1287.86	RNF216
ENSG00000011295	1941.62	1720.54	1997	1799.15	TTC19
ENSG00000011304	9610.34	10764.1	7763.48	8653.54	PTBP1
ENSG00000011332	23.5683	26.1154	36.5181	41.2335	DPF1
ENSG00000011347	16.6365	19.9706	19.6116	21.9912	SYT7
ENSG00000011376	1381.52	1603.79	1025.21	1213.64	LARS2
ENSG00000011405	1839.02	1758.95	1798.86	1707.07	PIK3C2A
ENSG00000011422	56.8413	72.2014	66.2736	89.3392	PLAUR
ENSG00000011426	5559.36	5574.87	4546.51	4005.15	ANLN
ENSG00000011451	1258.13	1629.91	1299.1	1433.55	WIZ
ENSG00000011454	1730.19	1594.57	1671.04	1529.76	RABGAP1
ENSG00000011478	281.434	261.154	259.684	322.996	QPCTL
ENSG00000011485	1969.34	1998.59	1958.45	1845.89	PPP5C
ENSG00000011523	393.037	387.122	410.491	384.846	CEP68
ENSG00000011566	1747.52	1622.23	1914.5	1696.07	MAP4K3
ENSG00000011590	8.31824	9.21719	13.5252	9.62115	ZBTB32
ENSG00000011638	233.604	152.084	347.598	261.145	TMEM159
ENSG00000012048	1242.88	1308.84	1846.87	1760.67	BRCA1
ENSG00000012061	1038.39	930.937	1095.54	944.247	ERCC1
ENSG00000012124	76.9437	59.9118	71.0074	67.348	CD22
ENSG00000012171	537.22	536.133	2073.42	1848.64	SEMA3B
ENSG00000012174	1079.98	1147.54	881.169	912.635	MBTPS2
ENSG00000012211	272.422	311.848	262.389	306.502	PRICKLE3
ENSG00000012232	492.856	662.102	415.901	527.789	EXTL3
ENSG00000012504	101.898	78.3461	92.6478	52.2291	NR1H4
ENSG00000012660	3122.11	3316.65	2617.13	2704.92	ELOVL5
ENSG00000012779	157.353	129.041	534.923	416.458	ALOX5
ENSG00000012817	856.779	966.269	764.175	845.287	KDM5D
ENSG00000012822	745.175	632.914	928.507	797.181	CALCOCO1
ENSG00000012963	616.936	539.206	797.312	738.08	UBR7
ENSG00000012983	643.277	654.421	657.326	702.344	MAP4K5
ENSG00000013275	1595.72	1474.75	1420.15	1269.99	PSMC4
ENSG00000013288	490.776	569.93	468.649	596.511	MAN2B2
ENSG00000013297	21.4888	354.862	22.9929	37.1101	CLDN11
ENSG00000013306	3479.1	3467.2	3186.54	3162.61	SLC25A39
ENSG00000013364	5512.91	4321.33	4241.51	3932.3	MVP
ENSG00000013374	1050.87	906.357	1044.15	839.789	NUB1
ENSG00000013375	1513.92	1465.53	1539.17	1462.41	PGM3
ENSG00000013392	323.718	241.183	304.318	283.137	RWDD2A
ENSG00000013441	1099.39	1056.9	1213.21	1144.92	CLK1
ENSG00000013503	260.638	316.457	197.468	213.04	POLR3B
ENSG00000013523	114.376	118.287	75.7413	112.705	ANGEL1
ENSG00000013561	3390.38	2677.59	2926.86	2526.24	RNF14
ENSG00000013563	458.196	431.672	538.304	511.295	DNASE1L1
ENSG00000013573	946.893	1603.79	1228.09	2010.82	DDX11
ENSG00000013583	1222.09	1024.64	1589.89	1226.01	HEBP1
ENSG00000013588	172.603	307.24	314.462	285.886	GPRC5A
ENSG00000013619	178.149	262.69	215.727	250.15	MAMLD1
ENSG00000013810	2810.87	3398.07	2503.52	2318.7	TACC3
ENSG00000014123	1961.02	1714.4	1544.58	1518.77	UFL1
ENSG00000014138	405.514	467.004	661.384	684.476	POLA2
ENSG00000014164	492.162	571.466	476.088	474.185	ZC3H3
ENSG00000014216	3237.87	3121.56	3853.34	3320.67	CAPN1
ENSG00000014641	6951.27	5196.96	6144.51	4648.39	MDH1
ENSG00000014824	2528.05	2199.84	2372.32	1942.1	SLC30A9
ENSG00000014914	278.661	271.907	202.878	266.643	MTMR11
ENSG00000014919	1744.75	1189.02	1816.44	1441.8	COX15
ENSG00000015133	174.683	276.516	177.857	211.665	CCDC88C
ENSG00000015153	366.696	364.079	335.426	251.524	YAF2
ENSG00000015171	2576.57	2565.45	2661.09	2464.39	ZMYND11
ENSG00000015285	40.2048	43.0136	39.8994	49.4802	WAS
ENSG00000015475	1290.02	1259.68	1395.8	1184.78	BID
ENSG00000015479	228.058	178.199	195.44	199.295	MATR3
ENSG00000015532	1213.08	1410.23	1109.74	1348.34	XYLT2
ENSG00000015676	1405.78	1640.66	1424.21	1533.89	NUDCD3
ENSG00000016391	42.9776	49.1584	77.0938	75.5947	CHDH
ENSG00000016864	1276.16	1192.09	1149.64	1125.67	GLT8D1
ENSG00000017260	2612.62	2579.28	2123.46	2101.53	ATP2C1
ENSG00000017797	2174.53	2021.64	2050.42	1965.46	RALBP1
ENSG00000018189	610.004	622.161	453.771	534.661	RUFY3
ENSG00000018236	45.7503	32.2602	41.2519	43.9824	CNTN1
ENSG00000018408	10372.1	8722.54	7580.21	7169.13	WWTR1
ENSG00000018510	3312.05	3481.03	3202.77	3152.99	AGPS
ENSG00000018610	530.981	451.643	484.203	428.828	CXorf56
ENSG00000018699	790.926	720.477	691.139	560.776	TTC27
ENSG00000019144	3430.58	3920.38	2571.15	3214.84	PHLDB1
ENSG00000019485	205.183	281.124	321.9	395.842	PRDM11
ENSG00000019505	63.7732	69.129	41.2519	49.4802	SYT13
ENSG00000019549	16.6365	29.1878	29.0792	26.1145	SNAI2
ENSG00000019582	630.8	619.088	543.714	518.168	CD74
ENSG00000019995	300.15	328.747	327.987	325.745	ZRANB1
ENSG00000020129	1197.83	1227.42	1067.14	1061.08	NCDN
ENSG00000020181	30.5002	35.3326	110.907	116.828	ADGRA2
ENSG00000020256	510.185	554.568	465.944	476.934	ZFP64
ENSG00000020426	283.513	258.081	225.871	203.419	MNAT1
ENSG00000020577	185.774	285.733	359.771	369.727	SAMD4A
ENSG00000020922	787.46	774.244	929.859	874.15	MRE11
ENSG00000021300	37.4321	36.8688	48.6908	31.6123	PLEKHB1
ENSG00000021355	607.925	514.627	649.211	591.013	SERPINB1
ENSG00000021574	495.628	427.063	348.951	313.375	SPAST
ENSG00000021645	47.8299	58.3756	45.3095	74.2203	NRXN3
ENSG00000021762	263.411	265.762	286.735	310.626	OSBPL5
ENSG00000021776	1868.83	1780.45	1557.43	1576.49	AQR
ENSG00000021826	36.0457	27.6516	22.9929	15.1189	CPS1
ENSG00000022267	561.481	563.785	775.672	787.56	FHL1
ENSG00000022277	2595.29	2293.55	2337.84	2028.69	RTF2
ENSG00000022567	149.035	172.054	130.518	184.176	SLC45A4
ENSG00000022840	3306.5	3233.7	3225.77	2978.43	RNF10
ENSG00000022976	110.217	107.534	100.087	130.573	ZNF839
ENSG00000023041	1700.39	1732.83	1965.22	1915.98	ZDHHC6
ENSG00000023171	21.4888	16.8982	14.8777	8.2467	GRAMD1B
ENSG00000023191	2657.68	2971.01	2677.32	2666.43	RNH1
ENSG00000023228	6820.96	5633.24	5997.76	5092.34	NDUFS1
ENSG00000023287	2135.71	1619.15	1907.06	1434.93	RB1CC1
ENSG00000023318	1989.45	2023.17	1586.51	1602.61	ERP44
ENSG00000023330	3355.72	3083.15	2920.77	2621.08	ALAS1
ENSG00000023445	499.787	499.265	1444.49	1096.81	BIRC3
ENSG00000023516	1354.49	1539.27	1197.66	1386.82	AKAP11
ENSG00000023572	273.115	273.443	304.994	287.26	GLRX2
ENSG00000023608	283.513	364.079	271.181	226.784	SNAPC1
ENSG00000023697	893.517	714.333	1915.85	1209.52	DERA
ENSG00000023734	5162.85	4603.99	4124.52	3503.47	STRAP
ENSG00000023839	5670.96	6091.03	5554.13	6525.89	ABCC2
ENSG00000023902	677.243	694.362	814.219	762.82	PLEKHO1
ENSG00000023909	3102.7	2972.55	2531.92	2405.29	GCLM
ENSG00000024048	1131.97	1092.24	902.809	970.362	UBR2
ENSG00000024422	58.9209	109.07	120.375	125.075	EHD2
ENSG00000024526	1689.99	1923.32	921.068	727.084	DEPDC1
ENSG00000024862	458.889	356.398	481.498	361.48	CCDC28A
ENSG00000025039	2681.94	2181.4	2746.97	2320.07	RRAGD
ENSG00000025156	501.867	404.02	461.21	437.075	HSF2
ENSG00000025293	1581.85	1394.87	1570.28	1359.33	PHF20
ENSG00000025434	76.9437	64.5204	103.468	78.3436	NR1H3
ENSG00000025708	176.069	165.909	226.548	270.767	TYMP
ENSG00000025770	1102.86	1290.41	1849.57	1792.28	NCAPH2
ENSG00000025772	936.495	900.213	935.269	777.939	TOMM34
ENSG00000025796	2792.85	2854.26	2487.97	2552.35	SEC63
ENSG00000025800	2142.64	1852.66	1907.06	1528.39	KPNA6
ENSG00000026025	42083.4	38569.3	43136	39669.4	VIM
ENSG00000026036	42.2844	145.939	54.7772	140.194	RTEL1-TNFRSF6B
ENSG00000026103	192.706	178.199	1461.4	1096.81	FAS
ENSG00000026297	3372.35	3284.39	2828.8	2963.31	RNASET2
ENSG00000026508	3630.22	3367.35	5539.93	4484.83	CD44
ENSG00000026652	4341.43	4398.14	3305.57	3991.4	AGPAT4
ENSG00000026950	113.683	107.534	94.6766	118.203	BTN3A1
ENSG00000027001	1644.93	1342.64	1418.12	1327.72	MIPEP
ENSG00000027075	49.2162	59.9118	77.0938	81.0925	PRKCH
ENSG00000027697	643.97	608.335	595.11	621.251	IFNGR1
ENSG00000027847	379.866	396.339	320.548	394.467	B4GALT7
ENSG00000028116	587.822	496.192	554.534	553.903	VRK2
ENSG00000028203	1100.09	1086.09	1052.94	1066.57	VEZT
ENSG00000028310	957.984	1311.91	941.356	1187.52	BRD9
ENSG00000028528	2559.94	2468.67	2652.97	2614.2	SNX1
ENSG00000028839	276.581	264.226	223.843	180.053	TBPL1
ENSG00000029153	558.708	553.032	662.06	570.397	ARNTL2
ENSG00000029363	4824.58	4246.05	3714.03	3429.25	BCLAF1
ENSG00000029364	1288.63	1169.05	1092.16	1040.46	SLC39A9
ENSG00000029534	6.23868	0	125.108	78.3436	ANK1
ENSG00000029639	268.956	255.009	202.202	167.683	TFB1M
ENSG00000029725	1623.44	1915.64	1652.11	1740.05	RABEP1
ENSG00000029993	3777.87	3570.13	3447.58	2765.39	HMGB3
ENSG00000030066	1915.27	2043.14	1840.78	1921.48	NUP160
ENSG00000030110	997.495	953.98	1222	1011.6	BAK1
ENSG00000030419	33.9661	30.724	16.9065	23.3656	IKZF2
ENSG00000030582	4959.06	4418.11	4906.95	5073.09	GRN
ENSG00000031003	929.563	996.993	994.78	841.163	FAM13B
ENSG00000031081	107.444	158.228	133.223	164.934	ARHGAP31
ENSG00000031691	449.878	367.152	739.83	519.542	CENPQ
ENSG00000031698	4097.43	3769.83	7773.62	5547.28	SARS
ENSG00000031823	1567.29	1702.11	1466.13	1480.28	RANBP3
ENSG00000032219	440.173	402.484	378.706	328.494	ARID4A
ENSG00000032389	984.325	947.835	830.449	783.436	EIPR1
ENSG00000032444	1811.3	2084.62	1729.88	2254.1	PNPLA6
ENSG00000032742	391.65	313.385	324.605	266.643	IFT88
ENSG00000033011	345.9	414.774	347.598	383.472	ALG1
ENSG00000033030	951.745	1012.36	1100.95	1102.31	ZCCHC8
ENSG00000033050	1335.77	1370.29	1119.89	1103.68	ABCF2
ENSG00000033100	643.97	1018.5	615.398	887.895	CHPF2
ENSG00000033122	59.614	118.287	71.0074	82.467	LRRC7
ENSG00000033170	128.24	144.403	109.554	78.3436	FUT8
ENSG00000033178	1954.09	1792.74	1827.93	1661.71	UBA6
ENSG00000033327	363.923	450.106	435.512	483.806	GAB2
ENSG00000033627	332.73	468.541	263.742	376.599	ATP6V0A1
ENSG00000033800	794.392	778.853	685.053	644.617	PIAS1
ENSG00000033867	1190.89	1679.07	1173.99	1408.81	SLC4A7
ENSG00000034053	600.3	668.247	655.974	680.353	APBA2
ENSG00000034152	519.197	529.989	583.614	498.925	MAP2K3
ENSG00000034510	36206.5	29422.8	33533.1	26019.7	TMSB10
ENSG00000034533	90.1142	72.2014	84.5327	71.4714	ASTE1
ENSG00000034677	2782.45	2118.42	2493.38	2321.45	RNF19A
ENSG00000034693	523.356	433.208	424.016	390.344	PEX3
ENSG00000034713	916.393	700.507	1241.62	665.234	GABARAPL2
ENSG00000035115	676.55	889.459	643.125	843.912	SH3YL1
ENSG00000035141	1422.42	1225.89	1249.05	1216.39	FAM136A
ENSG00000035403	4509.18	5186.21	4958.35	5407.09	VCL
ENSG00000035499	616.243	680.536	674.909	541.533	DEPDC1B
ENSG00000035664	24.2615	15.362	38.5469	46.7313	DAPK2
ENSG00000035681	962.836	1132.18	879.816	835.666	NSMAF
ENSG00000035687	2296.53	2026.25	2294.55	2069.92	ADSS
ENSG00000035862	7791.42	7018.89	7329.32	7255.72	TIMP2
ENSG00000035928	2372.78	2103.06	2813.92	2285.71	RFC1
ENSG00000036054	1048.79	745.057	864.262	677.604	TBC1D23
ENSG00000036257	2948.12	2686.81	2404.79	1953.09	CUL3
ENSG00000036448	99.8189	101.389	121.727	112.705	MYOM2
ENSG00000036549	1480.65	1450.17	1211.18	1322.22	AC118549.1
ENSG00000036672	2.77275	3.0724	30.4318	26.1145	USP2
ENSG00000037042	137.944	187.416	143.367	246.027	TUBG2
ENSG00000037241	1084.84	969.342	1139.5	821.921	RPL26L1
ENSG00000037280	110.217	145.939	129.166	192.423	FLT4
ENSG00000037474	2245.23	2548.55	1992.27	2083.67	NSUN2
ENSG00000037637	340.355	330.283	356.39	303.753	FBXO42
ENSG00000037749	593.368	574.538	626.218	650.115	MFAP3
ENSG00000037757	601.686	622.161	620.808	647.366	MRI1
ENSG00000037897	164.978	211.995	137.281	149.815	METTL1
ENSG00000037965	23.5683	50.6946	20.2878	48.1057	HOXC8
ENSG00000038002	250.934	248.864	200.173	192.423	AGA
ENSG00000038210	395.116	399.412	606.606	522.291	PI4K2B
ENSG00000038219	2782.45	2648.41	2446.71	2210.12	BOD1L1
ENSG00000038274	1580.47	1427.13	1932.75	1477.53	MAT2B
ENSG00000038358	1267.84	1562.31	1253.11	1564.12	EDC4
ENSG00000038382	4394.11	6289.2	3882.42	4954.89	TRIO
ENSG00000038427	36607.2	51739.2	24159.4	38635.8	VCAN
ENSG00000038532	530.981	654.421	495.7	516.793	CLEC16A
ENSG00000038945	280.047	245.792	187.324	152.564	MSR1
ENSG00000039123	3032	2514.76	2130.9	1834.89	MTREX
ENSG00000039139	110.217	153.62	171.094	137.445	DNAH5
ENSG00000039319	1322.6	1387.19	1525.65	1528.39	ZFYVE16
ENSG00000039523	228.752	276.516	231.281	339.489	RIPOR1
ENSG00000039560	1238.72	1467.07	1391.75	1507.77	RAI14
ENSG00000039650	568.413	791.142	568.06	784.811	PNKP
ENSG00000040199	291.832	376.369	289.44	331.242	PHLPP2
ENSG00000040275	2715.9	2751.33	2374.35	1995.7	SPDL1
ENSG00000040341	1407.86	1204.38	1105.01	1018.47	STAU2
ENSG00000040487	140.024	133.649	171.094	192.423	PQLC2
ENSG00000040531	234.297	310.312	268.476	332.617	CTNS
ENSG00000040608	167.058	181.271	250.217	318.872	RTN4R
ENSG00000040633	985.018	909.43	637.714	625.375	PHF23
ENSG00000040933	519.197	643.667	547.095	706.467	INPP4A
ENSG00000041353	53.3754	49.1584	101.439	41.2335	RAB27B
ENSG00000041357	4967.37	3989.51	4110.99	3146.12	PSMA4
ENSG00000041802	788.153	901.749	657.326	694.097	LSG1
ENSG00000041880	955.211	921.719	1240.94	1197.15	PARP3
ENSG00000041982	90.1142	121.36	68.9787	78.3436	TNC
ENSG00000041988	126.16	121.36	152.159	119.577	THAP3
ENSG00000042062	17.3297	7.68099	5.41009	12.37	RIPOR3
ENSG00000042088	413.139	419.382	336.102	314.749	TDP1
ENSG00000042286	1006.51	1041.54	1260.55	1248	AIFM2
ENSG00000042317	100.512	70.6652	114.964	71.4714	SPATA7
ENSG00000042429	1100.78	1015.43	792.578	850.784	MED17
ENSG00000042445	936.495	927.864	2132.25	1711.19	RETSAT
ENSG00000042493	189.933	221.213	350.98	251.524	CAPG
ENSG00000042753	2482.99	2181.4	2620.51	2091.91	AP2S1
ENSG00000043093	903.222	784.998	922.42	710.591	DCUN1D1
ENSG00000043143	1746.14	1857.26	1479.66	1389.57	JADE2
ENSG00000043355	314.013	305.704	285.382	316.123	ZIC2
ENSG00000043514	524.742	471.613	465.944	467.313	TRIT1
ENSG00000044090	1774.56	1740.51	2307.4	2458.89	CUL7
ENSG00000044115	16159.6	14308.2	13143.1	12205.1	CTNNA1
ENSG00000044446	837.369	966.269	805.427	964.864	PHKA2
ENSG00000044459	300.15	233.502	263.066	258.397	CNTLN
ENSG00000044574	12149.5	14676.8	11666.9	13359.7	HSPA5
ENSG00000046604	4670	4548.69	4880.58	5044.23	DSG2
ENSG00000046647	284.9	256.545	203.555	200.67	GEMIN8
ENSG00000046651	596.14	691.29	700.607	882.397	OFD1
ENSG00000046653	27.7275	32.2602	33.1368	31.6123	GPM6B
ENSG00000046889	468.594	715.869	448.361	688.599	PREX2
ENSG00000047056	585.743	577.611	484.203	559.401	WDR37
ENSG00000047188	1037.01	1055.37	1113.13	1083.07	YTHDC2
ENSG00000047230	594.061	569.93	520.045	483.806	CTPS2
ENSG00000047249	1868.14	1505.48	1831.99	1352.46	ATP6V1H
ENSG00000047315	3246.19	2935.68	2292.53	1898.12	POLR2B
ENSG00000047346	265.49	184.344	236.691	222.661	FAM214A
ENSG00000047365	94.2734	109.07	138.634	107.207	ARAP2
ENSG00000047410	7900.94	8000.52	7035.15	7622.7	TPR
ENSG00000047457	379.173	443.962	415.901	570.397	CP
ENSG00000047578	702.891	858.735	595.11	787.56	KIAA0556
ENSG00000047579	361.15	353.326	363.829	291.383	DTNBP1
ENSG00000047621	668.925	576.075	768.909	663.859	C12orf4
ENSG00000047634	187.16	225.821	290.116	409.586	SCML1
ENSG00000047644	783.301	972.414	745.916	1062.45	WWC3
ENSG00000047648	311.241	317.993	215.051	229.533	ARHGAP6
ENSG00000047849	15548.2	15423.4	13027.5	13097.1	MAP4
ENSG00000047932	793.005	844.909	666.117	717.463	GOPC
ENSG00000048028	393.73	417.846	334.073	369.727	USP28
ENSG00000048052	32.5798	39.9412	214.375	93.4626	HDAC9
ENSG00000048140	1332.3	1451.71	1105.01	1215.01	TSPAN17
ENSG00000048162	1078.6	1146	796.636	732.582	NOP16
ENSG00000048342	377.093	278.052	264.418	254.273	CC2D2A
ENSG00000048392	884.506	680.536	2821.36	1851.38	RRM2B
ENSG00000048405	495.628	494.656	482.851	453.568	ZNF800
ENSG00000048462	11.7842	43.0136	8.11514	16.4934	TNFRSF17
ENSG00000048471	2947.43	2680.67	1539.85	1786.78	SNX29
ENSG00000048544	1629.68	1345.71	1762.34	1355.21	MRPS10
ENSG00000048649	1654.64	1410.23	1393.77	1344.21	RSF1
ENSG00000048707	672.391	775.78	698.578	740.828	VPS13D
ENSG00000048740	542.072	536.133	847.355	776.564	CELF2
ENSG00000048828	7493.35	8189.48	6527.95	7203.49	FAM120A
ENSG00000048991	1421.03	1445.56	977.874	1026.71	R3HDM1
ENSG00000049130	331.343	393.267	1368.08	838.414	KITLG
ENSG00000049167	210.036	205.851	166.36	158.062	ERCC8
ENSG00000049192	7.62505	43.0136	14.2015	17.8678	ADAMTS6
ENSG00000049239	457.503	526.916	557.916	606.132	H6PD
ENSG00000049245	1080.68	995.457	1212.54	1021.22	VAMP3
ENSG00000049246	325.104	322.602	333.397	324.37	PER3
ENSG00000049249	1.38637	1.5362	58.8347	16.4934	TNFRSF9
ENSG00000049283	4.15912	4.6086	35.8419	31.6123	EPN3
ENSG00000049323	85.2619	78.3461	116.993	133.322	LTBP1
ENSG00000049449	5215.54	5345.97	5319.47	5150.06	RCN1
ENSG00000049541	1245.66	981.631	2191.09	1396.44	RFC2
ENSG00000049618	1220.7	1139.86	1035.36	1055.58	ARID1B
ENSG00000049656	2033.81	2354.99	1772.48	1889.87	CLPTM1L
ENSG00000049759	710.516	686.681	766.88	641.868	NEDD4L
ENSG00000049769	124.774	139.794	129.842	181.427	PPP1R3F
ENSG00000049860	2426.85	2351.92	2342.57	2188.12	HEXB
ENSG00000049883	445.719	367.152	398.318	424.705	PTCD2
ENSG00000050030	49.2162	73.7376	47.3383	61.8502	NEXMIF
ENSG00000050130	858.165	843.373	676.938	615.754	JKAMP
ENSG00000050165	1101.47	1428.67	1836.05	2053.43	DKK 3.00
ENSG00000050327	83.1824	112.143	110.907	131.947	ARHGEF5
ENSG00000050344	698.732	894.068	637.714	821.921	NFE2L3
ENSG00000050393	863.017	820.33	956.91	926.379	MCUR1
ENSG00000050405	140.717	374.833	157.569	137.445	LIMA1
ENSG00000050426	948.972	903.285	1198.34	1096.81	LETMD1
ENSG00000050438	113.683	86.0271	38.5469	54.978	SLC4A8
ENSG00000050555	4.15912	16.8982	8.11514	17.8678	LAMC3
ENSG00000050748	1593.64	1694.43	1636.55	1645.22	MAPK9
ENSG00000050820	3316.2	3951.1	3200.07	3392.14	BCAR1
ENSG00000051009	359.071	499.265	366.534	512.67	FAM160A2
ENSG00000051108	1739.2	1765.09	1945.6	1900.86	HERPUD1
ENSG00000051128	1593.64	1526.98	1613.56	1403.31	HOMER3
ENSG00000051180	603.765	609.871	1140.18	907.137	RAD51
ENSG00000051341	472.753	611.407	735.096	898.89	POLQ
ENSG00000051382	2023.41	2115.35	1796.83	1803.28	PIK3CB
ENSG00000051523	6018.94	5229.22	5701.56	4862.8	CYBA
ENSG00000051596	857.472	769.636	917.687	725.71	THOC3
ENSG00000051620	1497.98	1258.15	1288.95	1122.93	HEBP2
ENSG00000051825	1218.62	1236.64	1159.79	1155.91	MPHOSPH9
ENSG00000052126	682.096	576.075	469.325	449.445	PLEKHA5
ENSG00000052344	9.70461	12.2896	33.1368	34.3612	PRSS8
ENSG00000052723	1360.03	1291.94	1418.8	1342.84	SIKE1
ENSG00000052749	899.756	1090.7	658.679	698.221	RRP12
ENSG00000052795	1043.25	934.009	949.471	988.229	FNIP2
ENSG00000052802	927.484	840.301	616.75	533.287	MSMO1
ENSG00000052841	1466.78	1594.57	1437.73	1617.73	TTC17
ENSG00000052850	20.7956	33.7964	23.6691	28.8634	ALX4
ENSG00000053254	365.309	339.5	732.391	674.855	FOXN3
ENSG00000053371	553.856	436.281	646.506	560.776	AKR7A2
ENSG00000053372	804.79	811.113	726.981	614.379	MRTO4
ENSG00000053438	14.5569	41.4774	24.3454	19.2423	NNAT
ENSG00000053501	190.626	173.59	206.26	189.674	USE1
ENSG00000053524	15.2501	9.21719	25.6979	26.1145	MCF2L2
ENSG00000053702	36.7389	67.5928	43.957	49.4802	NRIP2
ENSG00000053747	97.0461	156.692	167.713	160.811	LAMA3
ENSG00000053770	881.04	826.475	634.333	738.08	AP5M1
ENSG00000053900	647.436	694.362	549.124	760.071	ANAPC4
ENSG00000053918	23.5683	23.043	40.5757	41.2335	KCNQ1
ENSG00000054116	1202.68	1098.38	1134.77	970.362	TRAPPC3
ENSG00000054118	4507.1	3636.18	3874.98	3273.94	THRAP3
ENSG00000054148	3745.98	3448.77	6341.98	4974.13	PHPT1
ENSG00000054179	68.6255	75.2738	95.3529	81.0925	ENTPD2
ENSG00000054267	1396.77	1344.17	1158.44	1206.77	ARID4B
ENSG00000054277	123.387	110.606	121.051	100.335	OPN3
ENSG00000054282	478.992	380.977	448.361	382.097	SDCCAG8
ENSG00000054392	147.649	138.258	317.843	283.137	HHAT
ENSG00000054523	1343.4	1347.25	1247.7	1239.75	KIF1B
ENSG00000054598	300.843	328.747	314.462	368.353	FOXC1
ENSG00000054611	1079.29	967.805	951.5	901.639	TBC1D22A
ENSG00000054654	2420.61	2972.55	2369.62	2704.92	SYNE2
ENSG00000054690	142.796	230.43	115.641	195.172	PLEKHH1
ENSG00000054793	415.912	420.919	686.405	654.238	ATP9A
ENSG00000054965	1233.18	1175.19	1183.46	1194.4	FAM168A
ENSG00000054967	233.604	307.24	386.145	453.568	RELT
ENSG00000055044	3359.18	3077.01	2721.95	2332.44	NOP58
ENSG00000055070	1742.67	1620.69	1851.6	1529.76	SZRD1
ENSG00000055118	6.93187	9.21719	14.8777	17.8678	KCNH2
ENSG00000055130	2354.75	2370.36	2047.04	1920.11	CUL1
ENSG00000055147	471.367	365.615	393.584	344.987	FAM114A2
ENSG00000055163	1947.85	1806.57	3602.44	3157.11	CYFIP2
ENSG00000055208	2177.3	2049.29	2421.69	2171.63	TAB2
ENSG00000055211	1721.18	1374.9	1772.48	1393.69	GINM1
ENSG00000055332	1861.21	1679.07	1976.04	1884.37	EIF2AK2
ENSG00000055483	1868.14	2522.44	1997	2479.51	USP36
ENSG00000055609	967.688	1009.28	810.837	949.745	KMT2C
ENSG00000055732	78.3301	119.824	159.598	288.634	MCOLN3
ENSG00000055813	50.6026	35.3326	54.7772	53.6035	CCDC85A
ENSG00000055917	2379.02	2748.26	2092.35	2318.7	PUM2
ENSG00000055950	1597.1	1371.83	1441.79	1285.11	MRPL43
ENSG00000056050	262.718	210.459	290.792	192.423	HPF1
ENSG00000056097	3395.23	3113.88	3140.56	2713.16	ZFR
ENSG00000056277	402.741	330.283	315.814	284.511	ZNF280C
ENSG00000056558	18.0228	24.5792	173.123	120.952	TRAF1
ENSG00000056586	1989.45	2152.21	2017.96	1874.75	RC3H2
ENSG00000056736	101.205	104.462	93.3241	98.9604	IL17RB
ENSG00000056972	37.4321	44.5498	87.914	76.9692	TRAF3IP2
ENSG00000056998	203.104	199.706	200.85	262.52	GYG2
ENSG00000057019	16809.1	15263.7	14296.8	12590	DCBLD2
ENSG00000057252	1766.93	1898.74	1951.69	2039.68	SOAT1
ENSG00000057294	376.4	431.672	481.498	475.56	PKP2
ENSG00000057468	13.8637	23.043	16.2303	17.8678	MSH4
ENSG00000057608	10072	7594.97	9145.76	6530.01	GDI2
ENSG00000057663	883.813	743.52	650.563	577.269	ATG5
ENSG00000057704	352.832	287.269	298.908	305.128	TMCC3
ENSG00000057757	424.923	370.224	478.117	338.115	PITHD1
ENSG00000057935	850.54	729.695	864.262	780.688	MTA3
ENSG00000058056	480.378	542.278	355.713	387.595	USP13
ENSG00000058063	1093.16	1187.48	1071.87	1125.67	ATP11B
ENSG00000058085	2.77275	29.1878	9.46766	9.62115	LAMC2
ENSG00000058091	333.423	317.993	435.512	404.088	CDK14
ENSG00000058262	4374.01	4981.89	4752.76	5288.88	SEC61A1
ENSG00000058272	2168.29	2058.51	1827.93	1672.71	PPP1R12A
ENSG00000058335	7.62505	13.8258	24.3454	8.2467	RASGRF1
ENSG00000058404	97.0461	119.824	75.065	105.833	CAMK2B
ENSG00000058453	327.184	460.86	290.116	364.229	CROCC
ENSG00000058600	755.573	1047.69	661.384	841.163	POLR3E
ENSG00000058668	741.71	520.771	536.275	481.057	ATP2B4
ENSG00000058673	2872.56	3115.41	2577.91	2593.59	ZC3H11A
ENSG00000058729	574.652	505.409	551.153	419.207	RIOK2
ENSG00000058799	219.74	162.837	165.684	141.568	YIPF1
ENSG00000058804	2168.29	2249	1686.6	1819.77	NDC1
ENSG00000058866	45.0571	44.5498	34.4893	31.6123	DGKG
ENSG00000059122	819.346	955.516	1449.9	1564.12	FLYWCH1
ENSG00000059145	491.469	794.215	696.549	914.009	UNKL
ENSG00000059377	186.467	176.663	156.216	166.308	TBXAS1
ENSG00000059378	56.8413	46.086	65.5974	70.0969	PARP12
ENSG00000059573	3513.07	3474.88	3079.02	3129.62	ALDH18A1
ENSG00000059588	242.615	271.907	253.598	325.745	TARBP1
ENSG00000059691	584.356	488.511	455.8	383.472	GATB
ENSG00000059728	65.8527	59.9118	150.13	101.709	MXD1
ENSG00000059758	460.969	528.452	668.822	562.15	CDK17
ENSG00000059769	695.266	757.346	552.506	687.225	DNAJC25
ENSG00000059804	34.6593	49.1584	89.2665	116.828	SLC2A3
ENSG00000059915	49.9094	55.3032	51.3959	45.3568	PSD
ENSG00000060069	368.775	479.294	344.217	357.357	CTDP1
ENSG00000060138	4597.21	3605.46	7177.84	5130.82	YBX3
ENSG00000060140	17.3297	18.4344	43.957	34.3612	STYK1
ENSG00000060237	2995.26	3866.61	3230.5	3711.01	WNK1
ENSG00000060339	3592.09	3490.24	3194.66	2838.24	CCAR1
ENSG00000060491	1304.58	1451.71	1506.03	1503.65	OGFR
ENSG00000060642	135.865	132.113	165.684	170.432	PIGV
ENSG00000060656	68.6255	78.3461	430.778	394.467	PTPRU
ENSG00000060688	589.209	665.174	505.843	446.696	SNRNP40
ENSG00000060749	1466.78	1895.67	1301.8	1584.74	QSER1
ENSG00000060762	774.983	619.088	663.412	522.291	MPC1
ENSG00000060971	1845.26	1565.39	1645.34	1483.03	ACAA1
ENSG00000060982	21.4888	208.923	33.1368	48.1057	BCAT1
ENSG00000061273	844.301	1413.3	962.32	1388.19	HDAC7
ENSG00000061337	13.8637	19.9706	35.8419	32.9868	LZTS1
ENSG00000061455	59.614	49.1584	48.6908	63.2247	PRDM6
ENSG00000061656	165.672	159.765	152.835	152.564	SPAG4
ENSG00000061676	12839.9	10610.5	10014.1	8866.58	NCKAP1
ENSG00000061794	3830.55	3183	3189.92	2526.24	MRPS35
ENSG00000061918	179.535	129.041	81.1514	79.7181	GUCY1B1
ENSG00000061936	1017.6	1138.32	1083.37	1147.67	SFSWAP
ENSG00000061938	246.081	328.747	262.389	355.983	TNK2
ENSG00000061987	978.086	1067.66	1115.83	1206.77	MON2
ENSG00000062194	1633.15	1479.36	1554.72	1248	GPBP1
ENSG00000062282	33.273	24.5792	35.8419	35.7357	DGAT2
ENSG00000062370	176.069	185.88	124.432	164.934	ZNF112
ENSG00000062485	11792.5	10555.2	9307.39	8771.74	CS
ENSG00000062582	632.879	499.265	564.678	498.925	MRPS24
ENSG00000062598	512.958	682.072	469.325	526.414	ELMO2
ENSG00000062650	2168.29	2070.8	1858.37	1821.15	WAPL
ENSG00000062716	6603.99	6991.24	5938.93	7397.29	VMP1
ENSG00000062725	1608.19	1290.41	1488.45	1330.47	APPBP2
ENSG00000062822	1189.51	1519.3	1725.82	1852.76	POLD1
ENSG00000063046	16649	11963.9	15874.6	12321.9	EIF4B
ENSG00000063169	168.444	261.154	158.921	250.15	BICRA
ENSG00000063176	398.582	410.165	382.088	454.943	SPHK2
ENSG00000063177	13044.4	10907	12088.2	9491.95	RPL18
ENSG00000063180	65.8527	32.2602	35.1656	20.6167	CA11
ENSG00000063241	843.608	791.142	666.794	610.256	ISOC2
ENSG00000063244	4898.06	5424.32	4290.2	4229.18	U2AF2
ENSG00000063245	2629.95	2972.55	2753.06	2985.31	EPN1
ENSG00000063322	874.108	732.767	942.708	826.044	MED29
ENSG00000063438	29.1138	70.6652	17.5828	38.4846	AHRR
ENSG00000063587	611.39	812.649	786.492	885.146	ZNF275
ENSG00000063601	1450.15	1677.53	1494.54	1627.35	MTMR1
ENSG00000063660	3556.05	5037.2	7406.41	8199.97	GPC1
ENSG00000063761	38.8184	44.5498	26.3742	26.1145	ADCK1
ENSG00000063854	622.481	560.713	688.434	575.894	HAGH
ENSG00000063978	2670.15	2731.36	2433.19	2331.07	RNF4
ENSG00000064012	1924.98	1551.56	1481.01	1388.19	CASP8
ENSG00000064042	3560.21	3872.76	3724.85	3805.85	LIMCH1
ENSG00000064102	924.018	983.167	710.074	672.106	INTS13
ENSG00000064115	1515.31	1413.3	2460.24	2087.79	TM7SF3
ENSG00000064199	83.1824	70.6652	38.5469	15.1189	SPA17
ENSG00000064205	8.31824	9.21719	29.7555	20.6167	WISP2
ENSG00000064225	38.1253	70.6652	39.2232	50.8546	ST3GAL6
ENSG00000064300	79.7164	84.4909	254.274	144.317	NGFR
ENSG00000064309	641.198	642.131	434.16	619.877	CDON
ENSG00000064313	904.608	1010.82	840.593	890.644	TAF2
ENSG00000064393	1868.83	2239.78	1391.75	1779.91	HIPK2
ENSG00000064419	2849.69	2454.85	2400.05	2151.01	TNPO3
ENSG00000064489	11.091	18.4344	12.849	13.7445	BORCS8-MEF2B
ENSG00000064490	693.187	688.217	646.506	593.762	RFXANK
ENSG00000064545	465.821	540.742	357.742	486.555	TMEM161A
ENSG00000064547	54.7617	84.4909	54.7772	100.335	LPAR2
ENSG00000064601	2635.5	2464.06	2064.63	2317.32	CTSA
ENSG00000064607	2821.96	3616.21	2765.91	3552.95	SUGP2
ENSG00000064651	506.026	625.233	422.663	486.555	SLC12A2
ENSG00000064652	447.105	368.688	463.915	398.59	SNX24
ENSG00000064655	24.2615	16.8982	39.8994	31.6123	EYA2
ENSG00000064666	506.719	629.842	578.203	640.494	CNN2
ENSG00000064687	41.5912	87.5633	48.6908	89.3392	ABCA7
ENSG00000064703	558.708	606.799	512.606	552.529	DDX20
ENSG00000064726	2815.72	2402.62	2629.98	2452.02	BTBD1
ENSG00000064763	384.719	364.079	382.088	384.846	FAR2
ENSG00000064932	2667.38	3399.61	2454.83	3183.23	SBNO2
ENSG00000064933	1000.27	898.676	1032.65	960.74	PMS1
ENSG00000064961	1988.75	1934.07	1580.42	1337.34	HMG20B
ENSG00000064989	49.2162	32.2602	36.5181	24.7401	CALCRL
ENSG00000064995	469.98	448.57	495.023	439.824	TAF11
ENSG00000064999	657.834	680.536	463.239	508.546	ANKS1A
ENSG00000065000	4894.59	5379.77	4749.38	4523.31	AP3D1
ENSG00000065029	566.333	592.973	624.865	665.234	ZNF76
ENSG00000065054	57.5345	84.4909	66.9499	61.8502	SLC9A3R2
ENSG00000065057	286.979	262.69	195.44	186.925	NTHL1
ENSG00000065060	1246.35	1328.81	1483.04	1533.89	UHRF1BP1
ENSG00000065135	5239.1	4547.15	4812.95	4082.12	GNAI3
ENSG00000065150	8786.14	7949.83	8884.72	8133.99	IPO5
ENSG00000065154	2530.82	2265.89	2366.24	2071.3	OAT
ENSG00000065183	1614.43	1588.43	1159.79	1091.31	WDR3
ENSG00000065243	1842.49	2063.12	1715.68	1865.13	PKN2
ENSG00000065268	876.188	963.197	898.751	875.525	WDR18
ENSG00000065308	561.481	768.099	603.901	777.939	TRAM2
ENSG00000065320	314.013	476.222	1153.03	1252.12	NTN1
ENSG00000065328	772.21	847.982	1167.23	1066.57	MCM10
ENSG00000065357	5.54549	6.1448	34.4893	20.6167	DGKA
ENSG00000065413	14.5569	15.362	22.3166	32.9868	ANKRD44
ENSG00000065427	3427.11	3344.31	3036.41	2644.44	KARS
ENSG00000065457	289.059	307.24	369.915	388.969	ADAT1
ENSG00000065485	392.344	420.919	379.383	397.216	PDIA5
ENSG00000065491	307.775	247.328	302.289	244.652	TBC1D22B
ENSG00000065518	2528.05	1828.08	2065.98	1544.88	NDUFB4
ENSG00000065526	821.426	1141.4	875.082	1096.81	SPEN
ENSG00000065534	1778.72	2070.8	2383.82	2408.04	MYLK
ENSG00000065548	3979.58	3484.1	3381.98	2531.74	ZC3H15
ENSG00000065559	729.232	709.724	792.578	677.604	MAP2K4
ENSG00000065600	299.457	288.805	219.785	229.533	TMEM206
ENSG00000065613	2729.08	2347.31	2136.31	2160.64	SLK
ENSG00000065615	1186.74	937.081	1030.62	879.648	CYB5R4
ENSG00000065621	18.716	12.2896	8.7914	16.4934	GSTO2
ENSG00000065665	258.559	298.023	221.814	333.991	SEC61A2
ENSG00000065675	12.4774	16.8982	20.2878	15.1189	PRKCQ
ENSG00000065802	1502.83	2004.74	1832.67	2295.33	ASB1
ENSG00000065809	921.245	1090.7	1328.85	1239.75	FAM107B
ENSG00000065833	711.209	666.71	600.52	603.383	ME1
ENSG00000065882	989.177	1078.41	1262.58	1282.36	TBC1D1
ENSG00000065883	1314.28	1505.48	1165.2	1389.57	CDK13
ENSG00000065911	2736.7	3141.53	5893.62	5178.93	MTHFD2
ENSG00000065923	97.7393	165.909	167.713	142.943	SLC9A7
ENSG00000065970	386.105	468.541	497.728	588.265	FOXJ2
ENSG00000065978	26087.4	21565.2	22554.7	18071.3	YBX1
ENSG00000065989	7.62505	7.68099	168.389	122.326	PDE4A
ENSG00000066027	1623.44	1560.78	1386.34	1256.25	PPP2R5A
ENSG00000066032	36.0457	35.3326	29.0792	32.9868	CTNNA2
ENSG00000066044	2523.2	2347.31	2358.8	2069.92	ELAVL1
ENSG00000066084	1123.66	1107.6	960.967	885.146	DIP2B
ENSG00000066117	1735.05	2061.58	1628.44	1922.86	SMARCD1
ENSG00000066135	1470.94	1356.46	1251.76	1353.83	KDM4A
ENSG00000066136	1480.65	1420.98	1562.16	1374.45	NFYC
ENSG00000066230	225.979	407.093	347.598	617.128	SLC9A3
ENSG00000066248	431.855	348.717	460.534	413.709	NGEF
ENSG00000066279	2946.04	4044.81	1894.88	1962.71	ASPM
ENSG00000066322	1704.55	1838.83	1744.75	1689.2	ELOVL1
ENSG00000066379	146.956	118.287	165.684	123.7	ZNRD1
ENSG00000066382	11.091	16.8982	14.8777	15.1189	MPPED2
ENSG00000066422	564.254	556.104	648.535	666.608	ZBTB11
ENSG00000066427	281.434	267.299	278.62	272.141	ATXN3
ENSG00000066455	621.788	533.061	696.549	500.3	GOLGA5
ENSG00000066468	4444.71	4722.28	3592.3	4205.82	FGFR2
ENSG00000066557	1361.42	1179.8	1476.28	1132.55	LRRC40
ENSG00000066583	711.903	883.314	763.499	702.344	ISOC1
ENSG00000066629	395.809	307.24	221.137	232.282	EML1
ENSG00000066651	302.923	296.486	370.591	344.987	TRMT11
ENSG00000066654	1631.07	1227.42	1286.25	1220.51	THUMPD1
ENSG00000066697	2779.68	2594.64	3530.76	2957.82	MSANTD3
ENSG00000066735	997.495	1287.33	1249.73	1653.46	KIF26A
ENSG00000066739	329.264	353.326	295.526	302.379	ATG2B
ENSG00000066777	1698.31	1786.6	1813.06	1720.81	ARFGEF1
ENSG00000066827	236.377	216.604	168.389	191.049	ZFAT
ENSG00000066855	788.846	698.971	586.995	591.013	MTFR1
ENSG00000066923	74.171	95.2443	111.583	142.943	STAG3
ENSG00000066926	483.151	480.83	519.369	500.3	FECH
ENSG00000066933	880.347	1010.82	710.074	813.674	MYO9A
ENSG00000067048	2925.25	2711.39	2414.93	2212.86	DDX3Y
ENSG00000067057	21974	22576	23027.4	21633.8	PFKP
ENSG00000067064	1216.54	1052.3	1050.23	875.525	IDI1
ENSG00000067066	934.415	824.939	913.629	835.666	SP100
ENSG00000067082	8587.89	6588.76	8299.08	7441.27	KLF6
ENSG00000067113	246.774	196.633	246.835	217.163	PLPP1
ENSG00000067141	1186.74	1490.11	1254.46	1495.4	NEO1
ENSG00000067167	8080.48	6266.16	8188.17	6749.92	TRAM1
ENSG00000067177	205.876	227.357	179.209	252.899	PHKA1
ENSG00000067182	1511.15	1749.73	1407.3	1459.67	TNFRSF1A
ENSG00000067191	76.2505	129.041	123.756	162.185	CACNB1
ENSG00000067208	295.991	215.068	200.173	199.295	EVI5
ENSG00000067221	155.274	175.127	210.317	184.176	STOML1
ENSG00000067225	128658	111811	93769.7	87689.9	PKM
ENSG00000067248	1057.11	904.821	674.233	676.229	DHX29
ENSG00000067334	2568.26	2058.51	2256.01	1731.81	DNTTIP2
ENSG00000067365	316.093	370.224	409.138	456.317	METTL22
ENSG00000067369	2785.92	2597.71	2206.64	2306.33	TP53BP1
ENSG00000067445	262.024	255.009	206.26	265.269	TRO
ENSG00000067533	729.232	669.783	666.794	569.022	RRP15
ENSG00000067560	21462.4	18512.7	19971.4	17186.1	RHOA
ENSG00000067596	1047.4	1086.09	974.493	882.397	DHX8
ENSG00000067601	85.2619	56.8394	91.2953	72.8458	PMS2P4
ENSG00000067606	253.013	224.285	241.425	202.044	PRKCZ
ENSG00000067646	320.252	304.167	326.634	283.137	ZFY
ENSG00000067704	6885.42	6935.94	5274.16	5734.2	IARS2
ENSG00000067715	77.6369	73.7376	71.0074	78.3436	SYT1
ENSG00000067798	63.7732	69.129	75.065	65.9736	NAV3
ENSG00000067829	2652.82	2582.35	2506.22	2320.07	IDH3G
ENSG00000067836	392.344	362.543	355.037	310.626	ROGDI
ENSG00000067840	500.481	657.493	733.067	918.132	PDZD4
ENSG00000067900	1140.29	1215.13	951.5	1074.82	ROCK1
ENSG00000067955	1235.95	1049.22	1233.5	1078.94	CBFB
ENSG00000067992	90.1142	93.7081	77.7701	65.9736	PDK3
ENSG00000068001	652.982	734.303	529.513	611.63	HYAL2
ENSG00000068024	418.685	579.147	370.591	449.445	HDAC4
ENSG00000068028	366.696	479.294	562.649	520.916	RASSF1
ENSG00000068078	2472.6	2288.94	1689.3	2060.3	FGFR3
ENSG00000068079	270.343	182.808	350.303	270.767	IFI35
ENSG00000068097	748.641	895.604	747.945	835.666	HEATR6
ENSG00000068120	1680.28	1705.18	1639.93	1606.73	COASY
ENSG00000068137	549.697	517.699	498.405	639.119	PLEKHH3
ENSG00000068305	833.903	748.129	1152.35	1001.97	MEF2A
ENSG00000068308	1102.86	1096.85	930.536	846.661	OTUD5
ENSG00000068323	1317.75	1434.81	1324.12	1499.52	TFE3
ENSG00000068354	293.218	271.907	248.188	279.013	TBC1D25
ENSG00000068366	2345.74	2296.62	2216.78	2072.67	ACSL4
ENSG00000068383	176.069	155.156	152.835	149.815	INPP5A
ENSG00000068394	525.435	496.192	603.901	454.943	GPKOW
ENSG00000068400	905.302	941.69	989.37	1139.42	GRIPAP1
ENSG00000068438	417.991	467.004	457.829	439.824	FTSJ1
ENSG00000068489	2587.67	2135.32	1852.28	1165.53	PRR11
ENSG00000068615	47.8299	50.6946	120.375	116.828	REEP1
ENSG00000068650	2168.98	3176.86	1867.83	2553.73	ATP11A
ENSG00000068654	2065.7	2425.66	1637.23	1931.1	POLR1A
ENSG00000068697	6522.88	5585.62	5541.96	4840.81	LAPTM4A
ENSG00000068724	615.55	631.378	693.168	711.965	TTC7A
ENSG00000068745	2213.34	2043.14	2339.86	2080.92	IP6K2
ENSG00000068784	367.389	336.428	342.865	277.639	SRBD1
ENSG00000068796	1077.91	1126.03	1062.41	1004.72	KIF2A
ENSG00000068878	1227.63	1321.13	1174.67	1117.43	PSME4
ENSG00000068885	306.388	327.21	304.318	291.383	IFT80
ENSG00000068903	312.627	201.242	521.398	386.22	SIRT2
ENSG00000068912	983.632	923.256	914.982	805.428	ERLEC1
ENSG00000068971	101.898	109.07	91.9715	97.5859	PPP2R5B
ENSG00000069011	304.309	282.661	305.67	365.604	PITX1
ENSG00000069020	8.31824	10.7534	87.2377	46.7313	MAST4
ENSG00000069188	30.5002	41.4774	36.5181	27.489	SDK2
ENSG00000069248	1639.39	1563.85	1417.44	1300.23	NUP133
ENSG00000069275	9721.94	8717.93	8659.53	7163.63	NUCKS1
ENSG00000069329	5706.31	4932.73	5225.47	4374.87	VPS35
ENSG00000069345	2283.36	1880.31	1950.34	1555.88	DNAJA2
ENSG00000069399	294.604	216.604	388.174	328.494	BCL3
ENSG00000069424	151.115	161.301	139.31	185.551	KCNAB2
ENSG00000069482	189.24	190.489	191.382	158.062	GAL
ENSG00000069493	30.5002	15.362	25.0217	37.1101	CLEC2D
ENSG00000069509	490.776	385.586	481.498	347.736	FUNDC1
ENSG00000069667	276.581	262.69	348.275	353.234	RORA
ENSG00000069696	29.1138	30.724	58.8347	75.5947	DRD4
ENSG00000069702	70.0118	89.0995	108.878	111.33	TGFBR3
ENSG00000069812	2.07956	0	33.1368	24.7401	HES2
ENSG00000069849	1583.24	1496.26	1263.93	1338.71	ATP1B3
ENSG00000069869	551.776	694.362	813.542	667.983	NEDD4
ENSG00000069943	361.15	351.79	397.642	284.511	PIGB
ENSG00000069956	2110.75	2032.39	2241.81	2102.91	MAPK6
ENSG00000069966	371.548	388.658	546.419	471.436	GNB5
ENSG00000069974	501.174	420.919	701.959	586.89	RAB27A
ENSG00000069998	1041.86	1064.59	873.73	960.74	HDHD5
ENSG00000070010	1516.69	1485.5	1558.78	1404.69	UFD1
ENSG00000070018	1387.07	1419.45	949.471	1063.82	LRP6
ENSG00000070047	1374.59	1651.41	1206.45	1388.19	PHRF1
ENSG00000070061	3043.78	3132.31	2357.45	2666.43	ELP1
ENSG00000070081	494.242	436.281	504.491	409.586	NUCB2
ENSG00000070087	2926.63	2660.7	2352.04	2038.31	PFN2
ENSG00000070159	5438.05	4882.04	4117.08	4198.94	PTPN3
ENSG00000070214	2552.31	2391.86	1971.3	2122.15	SLC44A1
ENSG00000070269	314.707	345.645	323.253	382.097	TMEM260
ENSG00000070366	566.333	617.552	710.751	743.577	SMG6
ENSG00000070367	1407.86	1376.43	1224.03	1116.05	EXOC5
ENSG00000070371	73.4778	104.462	127.137	184.176	CLTCL1
ENSG00000070404	228.058	291.878	739.83	655.613	FSTL3
ENSG00000070413	2032.42	2547.02	1786.68	2292.58	DGCR2
ENSG00000070423	888.665	1275.05	1011.01	1036.34	RNF126
ENSG00000070444	595.447	711.26	678.966	790.309	MNT
ENSG00000070476	539.992	519.235	501.786	596.511	ZXDC
ENSG00000070495	1208.92	1307.31	1011.69	1054.2	JMJD6
ENSG00000070501	363.23	327.21	438.217	262.52	POLB
ENSG00000070540	668.232	554.568	586.319	556.652	WIPI1
ENSG00000070610	1462.62	1732.83	1256.49	1647.97	GBA2
ENSG00000070614	3752.22	5235.37	5219.39	6204.27	NDST1
ENSG00000070669	2698.58	2775.91	4329.43	4124.72	ASNS
ENSG00000070718	431.162	479.294	542.362	575.894	AP3M2
ENSG00000070729	4.15912	0	21.6404	9.62115	CNGB1
ENSG00000070731	26.3411	24.5792	147.425	82.467	ST6GALNAC2
ENSG00000070756	27683.8	24929.4	25289.5	22560.2	PABPC1
ENSG00000070759	15.2501	10.7534	14.2015	10.9956	TESK2
ENSG00000070761	616.243	637.523	765.528	575.894	CFAP20
ENSG00000070770	1346.17	1353.39	1405.27	1231.51	CSNK2A2
ENSG00000070778	107.444	170.518	153.511	225.41	PTPN21
ENSG00000070785	484.537	447.034	443.627	383.472	EIF2B3
ENSG00000070814	3081.91	3719.14	3555.11	3337.16	TCOF1
ENSG00000070831	3205.99	2657.62	2939.03	2126.27	CDC42
ENSG00000070882	463.742	646.74	791.226	760.071	OSBPL3
ENSG00000070915	97.0461	133.649	62.216	112.705	SLC12A3
ENSG00000070950	1335.08	1222.81	1672.39	1572.37	RAD18
ENSG00000070961	806.176	972.414	670.175	841.163	ATP2B1
ENSG00000071051	1208.92	1474.75	1262.58	1520.14	NCK2
ENSG00000071054	3919.97	3992.58	4339.57	4119.23	MAP4K4
ENSG00000071073	153.887	181.271	197.468	206.167	MGAT4A
ENSG00000071082	16497.1	12073	16003.7	11127.5	RPL31
ENSG00000071127	11635.1	12096	12204.5	11128.9	WDR1
ENSG00000071189	928.177	869.489	865.615	793.058	SNX13
ENSG00000071205	246.081	245.792	332.044	290.009	ARHGAP10
ENSG00000071242	61.6936	69.129	60.1873	78.3436	RPS6KA2
ENSG00000071243	377.093	390.195	401.023	279.013	ING3
ENSG00000071246	167.058	242.719	178.533	270.767	VASH1
ENSG00000071462	2550.93	2358.07	2013.91	1850.01	BUD23
ENSG00000071537	1422.42	1560.78	1321.41	1411.56	SEL1L
ENSG00000071539	1707.32	2038.54	2339.19	2065.8	TRIP13
ENSG00000071553	3177.57	3591.63	2881.55	3404.51	ATP6AP1
ENSG00000071564	3872.14	4528.71	3477.34	3864.95	TCF3
ENSG00000071575	71.3982	75.2738	48.0146	38.4846	TRIB2
ENSG00000071626	4482.14	4393.53	3511.83	3323.42	DAZAP1
ENSG00000071655	1810.6	2318.12	1917.88	2074.04	MBD3
ENSG00000071794	1676.82	1387.19	1477.63	1231.51	HLTF
ENSG00000071859	2861.47	2679.13	3382.66	3049.9	FAM50A
ENSG00000071889	962.143	1030.79	1108.39	1070.7	FAM3A
ENSG00000071894	1365.58	1722.08	1462.08	1694.7	CPSF1
ENSG00000071994	1965.18	1765.09	1819.82	1533.89	PDCD2
ENSG00000072041	47.1367	84.4909	52.7484	74.2203	SLC6A15
ENSG00000072042	372.934	465.468	216.404	240.529	RDH11
ENSG00000072062	1382.21	1457.85	1608.15	1415.68	PRKACA
ENSG00000072071	299.457	384.05	220.461	316.123	ADGRL1
ENSG00000072110	3274.61	3863.54	3860.78	3980.41	ACTN1
ENSG00000072121	273.809	330.283	302.965	295.507	ZFYVE26
ENSG00000072133	352.139	333.355	290.116	342.238	RPS6KA6
ENSG00000072134	529.594	499.265	548.448	618.502	EPN2
ENSG00000072135	1484.11	1465.53	1402.57	1539.38	PTPN18
ENSG00000072163	56.1481	78.3461	104.144	127.824	LIMS2
ENSG00000072195	541.379	682.072	704.664	962.115	SPEG
ENSG00000072201	79.7164	56.8394	70.3312	56.3524	LNX1
ENSG00000072210	1127.12	978.559	927.154	853.533	ALDH3A2
ENSG00000072274	5491.42	7567.32	3929.75	5422.2	TFRC
ENSG00000072310	1017.6	1236.64	829.096	1092.69	SREBF1
ENSG00000072364	4489.08	4582.48	4396.38	4457.34	AFF4
ENSG00000072401	521.276	493.12	495.7	365.604	UBE2D1
ENSG00000072415	520.583	605.262	488.937	492.053	MPP5
ENSG00000072422	112.989	86.0271	134.576	133.322	RHOBTB1
ENSG00000072501	3295.41	4007.94	3588.24	3880.07	SMC1A
ENSG00000072506	1564.52	1457.85	1458.02	1228.76	HSD17B10
ENSG00000072518	1100.78	1109.14	925.126	853.533	MARK2
ENSG00000072571	2241.07	1851.12	1289.63	871.401	HMMR
ENSG00000072609	383.332	503.873	421.311	471.436	CHFR
ENSG00000072657	6.93187	35.3326	6.76261	1.37445	TRHDE
ENSG00000072682	743.096	1004.67	1300.45	1401.94	P4HA2
ENSG00000072736	257.172	279.588	282.001	241.903	NFATC3
ENSG00000072756	820.733	792.679	778.377	738.08	TRNT1
ENSG00000072778	4240.92	4574.8	5194.36	5343.86	ACADVL
ENSG00000072786	622.481	623.697	740.506	772.441	STK10
ENSG00000072803	2037.28	2252.07	1844.84	1915.98	FBXW11
ENSG00000072818	72.0914	59.9118	94.0003	105.833	ACAP1
ENSG00000072832	1208.92	1474.75	1164.52	1370.33	CRMP1
ENSG00000072840	2681.94	2686.81	1932.75	2549.6	EVC
ENSG00000072849	740.323	717.405	786.492	724.335	DERL2
ENSG00000072864	602.379	569.93	530.865	384.846	NDE1
ENSG00000072954	115.069	90.6357	98.0579	101.709	TMEM38A
ENSG00000072958	1718.41	1623.76	1653.46	1723.56	AP1M1
ENSG00000073008	988.484	1550.02	1760.98	2468.51	PVR
ENSG00000073050	810.335	774.244	1093.51	920.881	XRCC1
ENSG00000073060	226.672	351.79	242.102	235.031	SCARB1
ENSG00000073067	21.4888	38.405	18.2591	32.9868	CYP2W1
ENSG00000073111	2897.52	3289	4845.41	4451.84	MCM2
ENSG00000073150	69.3187	58.3756	100.763	119.577	PANX2
ENSG00000073169	582.97	634.45	532.218	603.383	SELENOO
ENSG00000073331	239.149	251.937	185.296	250.15	ALPK1
ENSG00000073350	2814.34	2545.48	1641.96	2013.57	LLGL2
ENSG00000073417	576.038	617.552	530.865	648.74	PDE8A
ENSG00000073464	49.9094	56.8394	62.216	57.7269	CLCN4
ENSG00000073536	610.697	679	664.765	687.225	NLE1
ENSG00000073578	6091.72	5614.81	6427.19	5796.06	SDHA
ENSG00000073584	2410.21	1984.77	2177.56	1818.4	SMARCE1
ENSG00000073605	45.0571	90.6357	50.7196	112.705	GSDMB
ENSG00000073614	1305.96	1296.55	1138.82	1122.93	KDM5A
ENSG00000073670	33.273	39.9412	29.0792	27.489	ADAM11
ENSG00000073711	311.934	281.124	308.375	287.26	PPP2R3A
ENSG00000073712	670.311	760.418	610.664	558.027	FERMT2
ENSG00000073792	688.334	688.217	586.319	665.234	IGF2BP2
ENSG00000073803	600.993	430.136	513.959	416.458	MAP3K13
ENSG00000073849	1032.15	958.588	942.708	1007.47	ST6GAL1
ENSG00000073905	13.1705	13.8258	10.8202	9.62115	VDAC1P1
ENSG00000073910	93.5802	96.7805	150.13	170.432	FRY
ENSG00000073921	4414.9	3800.56	3486.13	3202.47	PICALM
ENSG00000073969	885.892	703.579	810.837	793.058	NSF
ENSG00000074047	202.41	400.948	233.986	467.313	GLI2
ENSG00000074054	2008.16	2076.94	1509.42	1749.67	CLASP1
ENSG00000074071	2365.85	2192.16	2181.62	1808.78	MRPS34
ENSG00000074181	4.85231	10.7534	29.0792	20.6167	NOTCH3
ENSG00000074201	1615.82	1462.46	1452.61	1290.61	CLNS1A
ENSG00000074211	1231.1	1542.34	1512.8	1591.61	PPP2R2C
ENSG00000074219	182.308	122.896	136.605	115.454	TEAD2
ENSG00000074266	455.424	460.86	566.707	540.159	EED
ENSG00000074276	40.898	41.4774	32.4605	54.978	CDHR2
ENSG00000074319	1251.89	996.993	1185.49	857.657	TSG101
ENSG00000074356	1050.87	1247.39	1108.39	1290.61	NCBP3
ENSG00000074370	18.0228	19.9706	39.8994	35.7357	ATP2A3
ENSG00000074410	2160.66	3103.12	1810.35	2460.27	CA12
ENSG00000074416	6740.55	6723.94	5322.85	5719.09	MGLL
ENSG00000074527	560.095	757.346	656.65	656.987	NTN4
ENSG00000074582	790.233	941.69	654.621	694.097	BCS1L
ENSG00000074590	542.765	603.726	687.758	754.573	NUAK1
ENSG00000074603	1375.98	1356.46	1047.53	1150.41	DPP8
ENSG00000074621	433.935	413.238	451.743	519.542	SLC24A1
ENSG00000074657	506.719	591.437	550.477	711.965	ZNF532
ENSG00000074660	162.899	175.127	137.957	277.639	SCARF1
ENSG00000074695	2349.9	2789.74	2083.56	2379.17	LMAN1
ENSG00000074696	4676.24	4267.56	4238.81	4072.49	HACD3
ENSG00000074755	1432.12	1772.77	1346.44	1650.71	ZZEF1
ENSG00000074800	53927.1	50204.5	38400.8	37118.4	ENO1
ENSG00000074842	2367.93	2252.07	2187.71	1876.12	MYDGF
ENSG00000074855	563.561	791.142	620.808	931.877	ANO8
ENSG00000074935	227.365	287.269	266.447	347.736	TUBE1
ENSG00000074964	1068.2	944.762	671.528	841.163	ARHGEF10L
ENSG00000075043	18.0228	7.68099	6.76261	10.9956	KCNQ2
ENSG00000075089	734.085	579.147	640.42	486.555	ACTR6
ENSG00000075131	304.309	307.24	405.757	351.859	TIPIN
ENSG00000075142	3138.75	2708.32	2567.09	2295.33	SRI
ENSG00000075151	1217.93	1275.05	1004.25	1107.81	EIF4G3
ENSG00000075188	881.04	735.839	801.37	560.776	NUP37
ENSG00000075213	164.978	213.532	83.8564	93.4626	SEMA3A
ENSG00000075218	1238.72	1562.31	796.636	787.56	GTSE1
ENSG00000075223	266.877	397.876	706.017	659.736	SEMA3C
ENSG00000075234	439.48	391.731	351.656	375.225	TTC38
ENSG00000075239	1793.97	1405.62	1731.23	1353.83	ACAT1
ENSG00000075240	1262.99	1192.09	1332.23	1283.74	GRAMD4
ENSG00000075275	5146.91	7508.94	4727.07	6261.99	CELSR1
ENSG00000075292	2833.05	2628.44	2292.53	2358.56	ZNF638
ENSG00000075303	1012.75	915.575	1036.03	1054.2	SLC25A40
ENSG00000075336	664.766	668.247	682.348	547.031	TIMM21
ENSG00000075340	646.05	800.36	875.082	975.859	ADD2
ENSG00000075391	2300.69	2605.39	2544.77	2923.45	RASAL2
ENSG00000075399	282.82	291.878	307.023	285.886	VPS9D1
ENSG00000075407	942.04	1261.22	1100.28	1294.73	ZNF37A
ENSG00000075413	848.46	857.199	754.031	688.599	MARK3
ENSG00000075415	15458.1	13106.8	15140.1	12896.5	SLC25A3
ENSG00000075420	3749.45	4186.14	3645.05	3881.45	FNDC3B
ENSG00000075426	5052.64	5685.47	6502.93	7147.14	FOSL2
ENSG00000075461	137.251	250.4	282.001	402.714	CACNG4
ENSG00000075539	2534.29	2491.71	1788.71	1904.99	FRYL
ENSG00000075568	1320.52	1530.05	1554.05	1716.69	TMEM131
ENSG00000075618	6278.19	6424.38	8940.85	8155.99	FSCN1
ENSG00000075624	60479.8	59477	59114	51859.4	ACTB
ENSG00000075643	259.945	330.283	411.843	412.335	MOCOS
ENSG00000075651	169.831	113.679	166.36	125.075	PLD1
ENSG00000075702	347.98	553.032	321.9	412.335	WDR62
ENSG00000075711	1598.49	1740.51	1547.29	1502.27	DLG1
ENSG00000075785	5316.74	5044.88	4668.91	4025.76	RAB7A
ENSG00000075790	845.688	829.547	979.903	971.736	BCAP29
ENSG00000075826	153.194	317.993	177.857	377.974	SEC31B
ENSG00000075856	1969.34	1972.48	1848.22	1840.39	SART3
ENSG00000075886	8.31824	19.9706	14.8777	23.3656	TUBA3D
ENSG00000075891	342.434	523.844	241.425	437.075	PAX2
ENSG00000075914	639.811	663.638	566.707	512.67	EXOSC7
ENSG00000075945	562.867	454.715	514.635	456.317	KIFAP3
ENSG00000075975	1154.85	1047.69	1149.64	1051.45	MKRN2
ENSG00000076003	3188.66	3473.35	3272.43	3341.29	MCM6
ENSG00000076043	1127.81	1064.59	1204.42	925.005	REXO2
ENSG00000076053	847.767	714.333	766.204	591.013	RBM7
ENSG00000076067	536.526	553.032	515.987	534.661	RBMS2
ENSG00000076108	2982.78	3159.96	2487.29	2755.77	BAZ2A
ENSG00000076201	1787.03	2591.57	1604.77	2227.98	PTPN23
ENSG00000076242	1660.18	1476.29	2055.83	1683.7	MLH1
ENSG00000076248	1798.13	1700.57	2017.96	2023.19	UNG
ENSG00000076258	36.0457	21.5068	22.9929	17.8678	FMO4
ENSG00000076321	321.639	208.923	315.138	301.005	KLHL20
ENSG00000076351	35.3525	41.4774	109.554	86.5903	SLC46A1
ENSG00000076356	37.4321	30.724	96.7054	82.467	PLXNA2
ENSG00000076382	2018.56	2411.83	2182.97	2060.3	SPAG5
ENSG00000076513	431.162	413.238	572.793	551.154	ANKRD13A
ENSG00000076554	1717.72	1576.14	1604.09	1447.3	TPD52
ENSG00000076555	718.834	631.378	603.225	751.824	ACACB
ENSG00000076604	1368.35	1382.58	2916.04	2791.51	TRAF4
ENSG00000076641	658.527	871.025	757.413	852.159	PAG1
ENSG00000076650	198.945	276.516	207.612	228.159	GPATCH1
ENSG00000076685	756.96	628.305	594.434	533.287	NT5C2
ENSG00000076706	11.7842	43.0136	32.4605	19.2423	MCAM
ENSG00000076716	3497.82	4564.05	3605.83	4240.18	GPC4
ENSG00000076770	407.594	451.643	730.362	652.864	MBNL3
ENSG00000076826	336.889	402.484	367.886	428.828	CAMSAP3
ENSG00000076864	278.661	331.819	326.634	342.238	RAP1GAP
ENSG00000076924	1221.39	1273.51	1342.38	1280.99	XAB2
ENSG00000076928	1010.67	1215.13	990.723	1353.83	ARHGEF1
ENSG00000076944	1029.38	1064.59	1015.07	1177.9	STXBP2
ENSG00000076984	1418.26	1483.97	1260.55	1571	MAP2K7
ENSG00000077009	4.15912	4.6086	18.9353	6.87225	NMRK2
ENSG00000077044	1333	2066.19	1401.21	2047.93	DGKD
ENSG00000077063	429.082	393.267	222.49	287.26	CTTNBP2
ENSG00000077092	13.1705	18.4344	10.8202	10.9956	RARB
ENSG00000077097	6577.65	5788.4	4811.6	4473.83	TOP2B
ENSG00000077147	5507.37	5653.21	4622.25	4831.19	TM9SF3
ENSG00000077150	1321.21	1256.61	2400.73	1785.41	NFKB2
ENSG00000077152	876.188	903.285	1213.89	964.864	UBE2T
ENSG00000077157	323.025	379.441	284.706	376.599	PPP1R12B
ENSG00000077232	3970.57	4338.23	3183.16	3671.16	DNAJC10
ENSG00000077235	2892.67	3301.29	2519.07	2831.37	GTF3C1
ENSG00000077238	417.991	533.061	546.419	655.613	IL4R
ENSG00000077254	2406.05	1901.81	2049.07	1704.32	USP33
ENSG00000077264	41.5912	50.6946	43.957	35.7357	PAK3
ENSG00000077312	1789.11	1683.67	1769.78	1632.85	SNRPA
ENSG00000077348	817.267	708.188	727.657	589.639	EXOSC5
ENSG00000077380	6698.95	5361.33	5743.49	4444.97	DYNC1I2
ENSG00000077420	2.07956	47.6222	4.73383	2.7489	APBB1IP
ENSG00000077454	169.831	216.604	116.993	207.542	LRCH4
ENSG00000077458	424.23	496.192	486.232	538.784	FAM76B
ENSG00000077463	632.879	623.697	574.146	589.639	SIRT6
ENSG00000077514	664.766	722.014	1045.5	923.63	POLD3
ENSG00000077549	2627.87	2591.57	2293.2	2205.99	CAPZB
ENSG00000077585	223.206	211.995	303.641	257.022	GPR137B
ENSG00000077616	9.70461	26.1154	18.2591	10.9956	NAALAD2
ENSG00000077684	1737.82	1998.59	1222.68	1443.17	JADE1
ENSG00000077713	469.98	533.061	416.577	459.066	SLC25A43
ENSG00000077721	1836.94	1746.66	2058.54	1726.31	UBE2A
ENSG00000077782	1504.21	2401.08	1834.7	2605.96	FGFR1
ENSG00000077942	957.291	1201.31	1547.29	1669.96	FBLN1
ENSG00000078018	104.671	78.3461	102.115	72.8458	MAP2
ENSG00000078043	515.731	553.032	476.764	537.41	PIAS2
ENSG00000078053	29.807	27.6516	67.6261	35.7357	AMPH
ENSG00000078061	878.96	987.776	795.283	889.269	ARAF
ENSG00000078070	503.253	370.224	560.621	464.564	MCCC1
ENSG00000078081	2.77275	3.0724	63.5686	39.859	LAMP3
ENSG00000078114	2047.67	1649.88	2212.73	2057.55	NEBL
ENSG00000078124	383.332	387.122	353.685	369.727	ACER3
ENSG00000078140	2993.87	3003.27	2658.38	2358.56	UBE2K
ENSG00000078142	923.324	815.722	693.168	672.106	PIK3C3
ENSG00000078177	185.774	198.17	313.785	336.74	N4BP2
ENSG00000078237	203.797	207.387	668.146	459.066	TIGAR
ENSG00000078246	943.427	854.127	903.485	922.256	TULP3
ENSG00000078269	3838.17	4390.46	4180.65	4476.58	SYNJ2
ENSG00000078295	9.01142	7.68099	23.6691	10.9956	ADCY2
ENSG00000078304	1316.36	1138.32	1127.33	852.159	PPP2R5C
ENSG00000078319	242.615	184.344	231.958	248.775	PMS2P1
ENSG00000078369	6618.54	6642.52	6017.37	5545.91	GNB1
ENSG00000078401	34.6593	30.724	33.1368	34.3612	EDN1
ENSG00000078403	1361.42	1402.55	1127.33	1221.89	MLLT10
ENSG00000078487	64.4663	62.9842	60.8635	50.8546	ZCWPW1
ENSG00000078618	3314.12	2997.12	2700.31	2594.96	NRDC
ENSG00000078668	4819.03	3780.59	4240.16	3269.82	VDAC3
ENSG00000078674	3666.26	3302.83	3975.74	3205.22	PCM1
ENSG00000078687	138.637	155.156	181.914	163.56	TNRC6C
ENSG00000078699	824.892	837.228	745.916	838.414	CBFA2T2
ENSG00000078725	203.104	188.952	199.497	141.568	BRINP1
ENSG00000078747	854.699	798.823	836.535	820.547	ITCH
ENSG00000078804	571.186	433.208	570.088	461.815	TP53INP2
ENSG00000078808	1978.35	2281.26	1903	2124.9	SDF4
ENSG00000078814	13.8637	15.362	11.4964	13.7445	MYH7B
ENSG00000078900	198.945	224.285	380.735	446.696	TP73
ENSG00000078902	730.619	834.156	663.412	699.595	TOLLIP
ENSG00000078967	154.581	142.867	167.037	175.93	UBE2D4
ENSG00000079134	531.674	560.713	509.225	505.798	THOC1
ENSG00000079150	40.2048	33.7964	24.3454	24.7401	FKBP7
ENSG00000079156	83.8756	130.577	155.54	180.053	OSBPL6
ENSG00000079246	20629.9	17159.3	16032.1	13477.9	XRCC5
ENSG00000079257	543.458	302.631	479.469	338.115	LXN
ENSG00000079277	517.81	588.364	658.002	695.472	MKNK1
ENSG00000079308	1805.75	2046.22	1553.37	1991.58	TNS1
ENSG00000079313	1291.41	1654.49	1094.19	1382.7	REXO1
ENSG00000079332	2265.33	2089.23	1994.29	1778.54	SAR1A
ENSG00000079335	114.376	104.462	134.576	103.084	CDC14A
ENSG00000079337	2142.64	3421.12	3463.13	5545.91	RAPGEF3
ENSG00000079385	6.93187	10.7534	131.195	79.7181	CEACAM1
ENSG00000079387	459.583	437.817	466.62	454.943	SENP1
ENSG00000079393	26.3411	13.8258	28.403	26.1145	DUSP13
ENSG00000079432	1443.21	2146.07	2273.59	2857.48	CIC
ENSG00000079459	1819.61	1737.44	1284.22	1084.44	FDFT1
ENSG00000079462	727.153	640.595	742.535	688.599	PAFAH1B3
ENSG00000079482	94.2734	95.2443	126.461	125.075	OPHN1
ENSG00000079616	2017.17	2250.53	1812.38	1693.32	KIF22
ENSG00000079691	2024.1	1803.5	1644.67	1565.5	CARMIL1
ENSG00000079739	2298.61	1946.36	2324.31	2036.93	PGM1
ENSG00000079785	4739.32	4153.88	3597.03	3085.64	DDX1
ENSG00000079805	15596	15028.6	12500.7	12635.3	DNM2
ENSG00000079819	3262.14	3424.19	2624.57	2537.23	EPB41L2
ENSG00000079931	308.468	373.296	303.641	320.247	MOXD1
ENSG00000079950	2630.64	2192.16	2133.6	1939.35	STX7
ENSG00000079974	552.47	568.394	719.542	665.234	RABL2B
ENSG00000079999	2930.1	3027.85	3525.35	3220.34	KEAP1
ENSG00000080031	14.5569	7.68099	15.554	13.7445	PTPRH
ENSG00000080189	1016.21	1063.05	1016.42	1132.55	SLC35C2
ENSG00000080200	404.128	471.613	378.706	486.555	CRYBG3
ENSG00000080224	40.898	38.405	34.4893	42.6079	EPHA6
ENSG00000080293	36.0457	64.5204	28.403	52.2291	SCTR
ENSG00000080298	99.8189	87.5633	58.1585	65.9736	RFX3
ENSG00000080345	3522.77	4072.46	3607.85	3744	RIF1
ENSG00000080371	1642.16	1373.36	1670.37	1308.48	RAB21
ENSG00000080493	3288.48	2414.9	1546.61	1536.63	SLC4A4
ENSG00000080503	569.799	557.64	559.944	526.414	SMARCA2
ENSG00000080546	168.444	175.127	952.176	619.877	SESN1
ENSG00000080561	109.523	110.606	118.346	100.335	MID2
ENSG00000080603	176.763	265.762	169.742	210.291	SRCAP
ENSG00000080608	1340.62	1505.48	988.018	1044.58	PUM3
ENSG00000080644	11.7842	7.68099	8.7914	9.62115	CHRNA3
ENSG00000080802	693.187	683.609	616.75	529.163	CNOT4
ENSG00000080815	844.301	883.314	846.003	777.939	PSEN1
ENSG00000080819	644.663	771.172	578.88	618.502	CPOX
ENSG00000080822	1904.88	1688.28	1872.57	1649.34	CLDND1
ENSG00000080823	61.6936	173.59	58.1585	34.3612	MOK
ENSG00000080824	30261.1	27648.5	19914.5	15718.2	HSP90AA1
ENSG00000080839	754.88	792.679	878.464	762.82	RBL1
ENSG00000080845	1233.87	1362.61	1072.55	1223.26	DLGAP4
ENSG00000080854	11.7842	23.043	14.8777	19.2423	IGSF9B
ENSG00000080947	67.9323	112.143	138.634	217.163	CROCCP3
ENSG00000080986	949.666	907.894	912.277	626.749	NDC80
ENSG00000081014	438.787	463.932	451.066	508.546	AP4E1
ENSG00000081019	429.776	433.208	258.332	191.049	RSBN1
ENSG00000081026	408.98	447.034	371.267	383.472	MAGI3
ENSG00000081041	3.46593	7.68099	56.806	42.6079	CXCL2
ENSG00000081052	214.195	215.068	322.577	427.454	COL4A4
ENSG00000081059	18.0228	30.724	68.3024	54.978	TCF7
ENSG00000081087	809.642	1023.11	843.974	761.445	OSTM1
ENSG00000081154	3488.81	2759.01	4023.76	2909.71	PCNP
ENSG00000081177	491.469	488.511	401.023	494.802	EXD2
ENSG00000081181	6.23868	7.68099	16.9065	15.1189	ARG2
ENSG00000081307	1000.96	1004.67	845.327	849.41	UBA5
ENSG00000081320	585.743	534.597	358.419	299.63	STK17B
ENSG00000081377	799.244	748.129	715.485	706.467	CDC14B
ENSG00000081386	440.173	462.396	440.246	438.45	ZNF510
ENSG00000081479	85.2619	89.0995	37.1944	60.4758	LRP2
ENSG00000081665	519.197	399.412	530.189	464.564	ZNF506
ENSG00000081692	225.979	233.502	221.814	237.78	JMJD4
ENSG00000081721	490.776	439.353	526.808	518.168	DUSP12
ENSG00000081760	707.743	705.115	868.32	711.965	AACS
ENSG00000081791	1482.03	1531.59	1535.11	1498.15	KIAA0141
ENSG00000081803	144.183	141.33	131.871	144.317	CADPS2
ENSG00000081870	793.699	680.536	995.457	941.498	HSPB11
ENSG00000081913	129.626	211.995	148.101	182.802	PHLPP1
ENSG00000081923	99.1257	170.518	350.98	276.264	ATP8B1
ENSG00000082014	802.017	829.547	662.06	698.221	SMARCD3
ENSG00000082068	603.765	477.758	562.649	461.815	WDR70
ENSG00000082146	1009.28	831.084	879.14	812.3	STRADB
ENSG00000082153	6689.94	5989.64	5594.03	4421.61	BZW1
ENSG00000082175	119.921	115.215	125.108	141.568	PGR
ENSG00000082196	9.01142	15.362	14.2015	23.3656	C1QTNF3
ENSG00000082212	889.358	840.301	875.082	732.582	ME2
ENSG00000082213	713.289	543.814	599.844	474.185	C5orf22
ENSG00000082258	1123.66	1381.04	965.701	1246.63	CCNT2
ENSG00000082269	371.548	351.79	273.21	261.145	FAM135A
ENSG00000082397	2689.56	2671.45	2585.35	2446.52	EPB41L3
ENSG00000082438	148.342	199.706	321.224	259.771	COBLL1
ENSG00000082458	779.142	680.536	746.593	618.502	DLG3
ENSG00000082482	80.4096	119.824	128.49	151.189	KCNK2
ENSG00000082497	161.512	225.821	411.167	476.934	SERTAD4
ENSG00000082512	11.7842	27.6516	20.2878	42.6079	TRAF5
ENSG00000082515	1487.58	1169.05	1305.18	990.978	MRPL22
ENSG00000082516	1169.41	1153.69	879.816	854.908	GEMIN5
ENSG00000082641	9756.6	10822.5	9056.49	11337.8	NFE2L1
ENSG00000082684	98.4325	152.084	89.2665	174.555	SEMA5B
ENSG00000082701	1203.37	1127.57	1239.59	1107.81	GSK3B
ENSG00000082781	2569.64	3010.95	2327.69	2589.46	ITGB5
ENSG00000082805	1362.11	1697.5	1248.38	1411.56	ERC1
ENSG00000082898	8915.76	8971.4	6784.93	7254.35	XPO1
ENSG00000082996	1053.64	844.909	864.938	683.102	RNF13
ENSG00000083093	524.742	597.581	757.413	753.199	PALB2
ENSG00000083097	183.001	202.778	172.447	230.908	DOPEY1
ENSG00000083099	1133.36	937.081	975.169	783.436	LYRM2
ENSG00000083123	568.413	520.771	549.8	467.313	BCKDHB
ENSG00000083168	991.95	1106.06	1067.82	1135.3	KAT6A
ENSG00000083223	1547.19	1388.72	1361.99	1367.58	ZCCHC6
ENSG00000083290	111.603	105.998	133.9	134.696	ULK2
ENSG00000083312	2837.21	2984.83	2519.07	2332.44	TNPO1
ENSG00000083444	1082.06	1371.83	947.442	1230.13	PLOD1
ENSG00000083457	281.434	285.733	268.476	235.031	ITGAE
ENSG00000083520	2065.7	1788.14	1942.22	1724.93	DIS3
ENSG00000083535	759.039	576.075	601.873	441.198	PIBF1
ENSG00000083544	884.506	611.407	650.563	531.912	TDRD3
ENSG00000083635	410.366	334.891	327.987	294.132	NUFIP1
ENSG00000083642	1274.77	1116.82	1095.54	981.357	PDS5B
ENSG00000083720	39.5116	81.4185	60.1873	27.489	OXCT1
ENSG00000083750	374.321	330.283	287.411	336.74	RRAGB
ENSG00000083799	211.422	302.631	580.909	362.855	CYLD
ENSG00000083807	21.4888	30.724	26.3742	35.7357	SLC27A5
ENSG00000083812	101.205	121.36	126.461	130.573	ZNF324
ENSG00000083814	58.9209	75.2738	66.9499	87.9648	ZNF671
ENSG00000083817	98.4325	93.7081	91.9715	87.9648	ZNF416
ENSG00000083828	214.195	192.025	144.044	195.172	ZNF586
ENSG00000083838	164.978	187.416	184.619	195.172	ZNF446
ENSG00000083844	438.787	428.6	479.469	420.582	ZNF264
ENSG00000083845	12921	10576.7	12300.5	9630.77	RPS5
ENSG00000083857	8599.67	11000.7	6998.63	9244.55	FAT1
ENSG00000083896	1964.49	1829.61	2001.73	1891.24	YTHDC1
ENSG00000083937	2016.48	1483.97	1769.1	1360.71	CHMP2B
ENSG00000084070	327.184	334.891	315.814	329.868	SMAP2
ENSG00000084072	926.79	1021.57	921.068	1127.05	PPIE
ENSG00000084073	1858.43	1878.77	1258.52	1308.48	ZMPSTE24
ENSG00000084090	5160.77	4871.29	4343.63	4172.83	STARD7
ENSG00000084092	1027.3	755.81	1013.04	841.163	NOA1
ENSG00000084093	820.04	781.925	737.801	656.987	REST
ENSG00000084112	654.368	838.765	718.19	784.811	SSH1
ENSG00000084207	791.619	878.706	713.456	624	GSTP1
ENSG00000084234	8711.97	9698.02	8414.04	9685.75	APLP2
ENSG00000084444	61.0004	56.8394	65.5974	82.467	FAM234B
ENSG00000084463	2915.54	2958.72	2763.2	2348.93	WBP11
ENSG00000084623	4894.59	3676.12	4494.43	3485.6	EIF3I
ENSG00000084628	40.898	41.4774	50.7196	61.8502	NKAIN1
ENSG00000084636	9.70461	16.8982	34.4893	35.7357	COL16A1
ENSG00000084652	2279.2	2195.23	2503.52	2222.49	TXLNA
ENSG00000084676	445.719	526.916	424.016	471.436	NCOA1
ENSG00000084693	1384.29	1279.65	1679.83	1443.17	AGBL5
ENSG00000084710	174.683	150.548	119.698	109.956	EFR3B
ENSG00000084731	794.392	809.577	1036.03	970.362	KIF3C
ENSG00000084733	6419.6	5501.13	5500.71	4538.43	RAB10
ENSG00000084754	6056.37	5232.29	5206.54	4644.27	HADHA
ENSG00000084764	164.978	178.199	195.44	184.176	MAPRE3
ENSG00000084774	2181.46	3040.14	2292.53	2902.84	CAD
ENSG00000085063	1714.25	1556.17	1796.15	1553.13	CD59
ENSG00000085117	36.7389	50.6946	411.167	240.529	CD82
ENSG00000085185	250.934	322.602	262.389	312	BCORL1
ENSG00000085224	2612.62	2247.46	2012.55	1926.98	ATRX
ENSG00000085231	630.107	523.844	663.412	428.828	AK6
ENSG00000085274	422.151	334.891	364.505	324.37	MYNN
ENSG00000085276	76.9437	101.389	44.6332	60.4758	MECOM
ENSG00000085365	1349.63	1247.39	1276.78	1180.65	SCAMP1
ENSG00000085377	1097.31	1053.83	792.578	839.789	PREP
ENSG00000085382	325.104	276.516	323.929	314.749	HACE1
ENSG00000085415	858.858	894.068	676.261	676.229	SEH1L
ENSG00000085433	813.108	662.102	806.78	757.322	WDR47
ENSG00000085449	1944.39	2060.04	2185	1977.83	WDFY1
ENSG00000085465	87.3415	41.4774	62.216	53.6035	OVGP1
ENSG00000085491	2566.18	2439.48	2379.76	2398.41	SLC25A24
ENSG00000085511	940.654	1126.03	839.917	975.859	MAP3K4
ENSG00000085514	22.8752	56.8394	24.3454	31.6123	PILRA
ENSG00000085563	337.582	368.688	330.016	382.097	ABCB1
ENSG00000085644	250.934	259.618	242.102	305.128	ZNF213
ENSG00000085662	4226.36	5001.86	4585.73	5213.29	AKR1B1
ENSG00000085719	2503.79	1886.45	2174.86	1654.84	CPNE3
ENSG00000085721	1418.95	1424.06	1437.73	1368.95	RRN3
ENSG00000085733	6904.14	7195.56	6334.54	6729.31	CTTN
ENSG00000085760	1381.52	1225.89	1180.08	1028.09	MTIF2
ENSG00000085788	1230.41	1301.16	1169.93	1279.61	DDHD2
ENSG00000085831	2248.7	1682.14	1840.78	1705.69	TTC39A
ENSG00000085832	924.018	803.432	842.622	815.049	EPS15
ENSG00000085840	622.481	712.796	1071.87	957.992	ORC1
ENSG00000085871	492.162	334.891	411.843	301.005	MGST2
ENSG00000085872	1485.5	1914.1	1277.46	1598.49	CHERP
ENSG00000085978	1008.59	1013.89	835.183	1003.35	ATG16L1
ENSG00000085982	1020.37	1053.83	1064.44	1074.82	USP40
ENSG00000085998	1416.18	1526.98	1417.44	1463.79	POMGNT1
ENSG00000085999	483.151	734.303	920.392	1142.17	RAD54L
ENSG00000086015	1247.04	1554.63	1437.06	1696.07	MAST2
ENSG00000086061	3036.16	3159.96	2583.32	2177.13	DNAJA1
ENSG00000086062	1751.68	1983.23	1208.48	1521.52	B4GALT1
ENSG00000086065	1300.42	921.719	1293.69	879.648	CHMP5
ENSG00000086102	806.869	861.808	922.42	876.899	NFX1
ENSG00000086189	820.733	869.489	752.679	633.621	DIMT1
ENSG00000086200	1098.01	1024.64	1044.82	848.036	IPO11
ENSG00000086232	3980.28	3660.76	3645.05	3595.56	EIF2AK1
ENSG00000086289	2925.25	2574.67	2828.12	2703.54	EPDR1
ENSG00000086300	936.495	860.271	1235.53	1061.08	SNX10
ENSG00000086475	1650.48	1860.34	1225.39	1291.98	SEPHS1
ENSG00000086504	2173.83	2147.61	2051.78	1764.79	MRPL28
ENSG00000086544	194.092	193.561	225.871	240.529	ITPKC
ENSG00000086570	40.2048	61.448	56.806	71.4714	FAT2
ENSG00000086589	1891.01	1546.95	2026.08	1707.07	RBM22
ENSG00000086598	7966.1	6828.4	6579.35	5479.93	TMED2
ENSG00000086619	203.797	205.851	219.785	244.652	ERO1B
ENSG00000086666	1958.95	1542.34	1577.04	1230.13	ZFAND6
ENSG00000086696	20.1024	6.1448	30.4318	28.8634	HSD17B2
ENSG00000086712	852.619	900.213	773.643	725.71	TXLNG
ENSG00000086730	26.3411	35.3326	39.8994	50.8546	LAT2
ENSG00000086758	6093.11	6650.21	5000.95	5231.16	HUWE1
ENSG00000086827	662.686	522.308	572.117	486.555	ZW10
ENSG00000086848	140.717	153.62	185.296	191.049	ALG9
ENSG00000087008	274.502	204.314	246.159	219.912	ACOX3
ENSG00000087053	1409.25	1322.67	1088.1	989.604	MTMR2
ENSG00000087074	1999.84	1356.46	3178.43	2211.49	PPP1R15A
ENSG00000087076	30.5002	16.8982	67.6261	41.2335	HSD17B14
ENSG00000087077	2930.79	2696.03	3860.78	3396.27	TRIP6
ENSG00000087085	16.6365	10.7534	60.1873	50.8546	ACHE
ENSG00000087086	43320	39021	33683.9	29942.4	FTL
ENSG00000087087	3135.98	3874.29	2354.07	2902.84	SRRT
ENSG00000087088	1456.38	1522.37	2459.56	2107.03	BAX
ENSG00000087095	454.037	462.396	413.872	387.595	NLK
ENSG00000087111	942.04	1141.4	985.313	1220.51	PIGS
ENSG00000087116	590.595	508.482	630.952	596.511	ADAMTS2
ENSG00000087152	1553.43	1844.97	1412.71	1683.7	ATXN7L3
ENSG00000087157	870.642	992.385	902.133	1044.58	PGS1
ENSG00000087191	4227.05	4100.12	4060.27	3713.76	PSMC5
ENSG00000087206	1174.26	947.835	1082.69	952.494	UIMC1
ENSG00000087245	3.46593	13.8258	15.554	6.87225	MMP2
ENSG00000087253	35.3525	39.9412	17.5828	16.4934	LPCAT2
ENSG00000087263	850.54	861.808	854.794	794.432	OGFOD1
ENSG00000087266	2596.68	2983.3	2439.95	3010.05	SH3BP2
ENSG00000087269	1433.51	1437.88	1409.33	1234.26	NOP14
ENSG00000087274	4105.74	4533.32	3868.89	4138.47	ADD1
ENSG00000087299	158.74	118.287	145.396	144.317	L2HGDH
ENSG00000087301	81.1028	69.129	73.0362	60.4758	TXNDC16
ENSG00000087302	1127.12	1081.48	1137.47	849.41	RTRAF
ENSG00000087338	3819.46	3504.07	3152.73	2974.31	GMCL1
ENSG00000087365	4330.34	4069.39	4169.83	3671.16	SF3B2
ENSG00000087448	817.96	1092.24	984.637	1177.9	KLHL42
ENSG00000087460	16605.3	16271.4	16426.4	15781.4	GNAS
ENSG00000087470	3049.33	2901.88	2598.87	2442.4	DNM1L
ENSG00000087494	13.8637	12.2896	22.9929	28.8634	PTHLH
ENSG00000087502	1500.06	1385.65	1221.33	1187.52	ERGIC2
ENSG00000087510	17.3297	16.8982	12.849	16.4934	TFAP2C
ENSG00000087586	2913.46	2743.65	1553.37	1259	AURKA
ENSG00000087842	342.434	347.181	317.167	281.762	PIR
ENSG00000087884	210.036	168.982	183.943	120.952	AAMDC
ENSG00000087903	142.103	164.373	127.813	160.811	RFX2
ENSG00000087995	869.949	729.695	745.916	613.005	METTL2A
ENSG00000088035	391.65	413.238	334.749	372.476	ALG6
ENSG00000088038	978.779	1087.63	1012.36	1105.06	CNOT3
ENSG00000088179	322.332	354.862	269.152	335.366	PTPN4
ENSG00000088205	5729.19	5287.6	4532.98	4189.32	DDX18
ENSG00000088247	6786.99	7722.47	6744.35	6781.54	KHSRP
ENSG00000088256	1647.7	1751.27	2220.84	2027.31	GNA11
ENSG00000088280	12.4774	32.2602	19.6116	16.4934	ASAP3
ENSG00000088298	709.823	562.249	691.139	588.265	EDEM2
ENSG00000088305	85.9551	135.186	87.914	127.824	DNMT3B
ENSG00000088325	5124.73	5307.57	4072.45	3201.09	TPX2
ENSG00000088340	154.581	256.545	151.483	309.251	FER1L4
ENSG00000088356	522.663	459.323	659.355	465.938	PDRG1
ENSG00000088367	868.563	729.695	1093.51	918.132	EPB41L1
ENSG00000088387	272.422	367.152	325.282	350.485	DOCK9
ENSG00000088448	2781.76	3023.24	2786.2	3739.88	ANKRD10
ENSG00000088451	393.037	302.631	403.728	344.987	TGDS
ENSG00000088538	587.822	778.853	428.75	714.714	DOCK3
ENSG00000088543	29.1138	30.724	25.6979	34.3612	C3orf18
ENSG00000088682	1826.55	1700.57	1641.96	1399.19	COQ9
ENSG00000088726	1.38637	1.5362	103.468	27.489	TMEM40
ENSG00000088727	409.673	265.762	316.49	252.899	KIF9
ENSG00000088756	20.1024	9.21719	22.9929	28.8634	ARHGAP28
ENSG00000088766	1106.33	1102.99	898.075	864.529	CRLS1
ENSG00000088808	137.251	141.33	136.605	148.441	PPP1R13B
ENSG00000088812	890.051	1087.63	689.11	925.005	ATRN
ENSG00000088826	390.264	451.643	668.822	584.141	SMOX
ENSG00000088832	6054.29	4786.8	5780.01	4678.63	FKBP1A
ENSG00000088833	1604.73	1459.39	1365.37	1169.66	NSFL1C
ENSG00000088836	72.0914	92.1719	117.669	171.806	SLC4A11
ENSG00000088854	516.424	500.801	405.757	540.159	C20orf194
ENSG00000088876	228.058	258.081	261.713	312	ZNF343
ENSG00000088881	140.717	205.851	307.023	387.595	EBF4
ENSG00000088888	3430.58	3219.87	3285.28	3555.7	MAVS
ENSG00000088899	156.66	144.403	229.253	189.674	LZTS3
ENSG00000088930	4213.88	3468.74	3833.73	3141.99	XRN2
ENSG00000088970	176.763	122.896	163.655	140.194	KIZ
ENSG00000088986	4294.98	3883.51	3780.3	3098.01	DYNLL1
ENSG00000088992	119.921	129.041	138.634	131.947	TESC
ENSG00000089006	3666.96	3284.39	3589.6	3022.42	SNX5
ENSG00000089009	24007.8	19840	22241.6	17741.4	RPL6
ENSG00000089022	1084.84	1245.86	1015.07	1154.54	MAPKAPK5
ENSG00000089048	1190.89	897.14	1165.2	852.159	ESF1
ENSG00000089050	558.708	419.382	665.441	533.287	RBBP9
ENSG00000089053	1946.47	2010.88	1703.5	1811.52	ANAPC5
ENSG00000089057	390.264	526.916	461.21	566.273	SLC23A2
ENSG00000089060	194.092	236.575	288.764	302.379	SLC8B1
ENSG00000089063	2120.46	1688.28	1837.4	1454.17	TMEM230
ENSG00000089091	125.467	90.6357	100.087	100.335	DZANK1
ENSG00000089094	598.913	666.71	674.909	830.168	KDM2B
ENSG00000089123	167.058	172.054	149.454	164.934	TASP1
ENSG00000089127	31.1934	27.6516	36.5181	13.7445	OAS1
ENSG00000089154	3589.32	4531.79	3276.49	3807.23	GCN1
ENSG00000089157	49211.4	37541.6	49456.3	37635.2	RPLP0
ENSG00000089159	2876.72	2974.08	2431.84	2611.45	PXN
ENSG00000089177	438.094	337.964	321.9	333.991	KIF16B
ENSG00000089195	605.845	640.595	606.606	520.916	TRMT6
ENSG00000089220	3836.09	2835.82	3287.98	2589.46	PEBP1
ENSG00000089234	725.073	695.898	806.78	714.714	BRAP
ENSG00000089248	3140.13	2663.77	3270.4	2710.42	ERP29
ENSG00000089280	11087.5	10877.8	10288	10250.6	FUS
ENSG00000089289	1589.48	1095.31	1600.71	1219.14	IGBP1
ENSG00000089327	636.345	659.029	953.529	830.168	FXYD5
ENSG00000089335	249.547	299.559	261.713	277.639	ZNF302
ENSG00000089351	1875.07	1874.16	2012.55	2146.89	GRAMD1A
ENSG00000089486	904.608	874.097	2824.07	1991.58	CDIP1
ENSG00000089505	12.4774	23.043	25.6979	28.8634	CMTM1
ENSG00000089597	6579.03	8492.11	5772.57	7751.9	GANAB
ENSG00000089639	292.525	324.138	385.469	388.969	GMIP
ENSG00000089682	385.412	380.977	451.743	536.035	RBM41
ENSG00000089685	3834.71	3729.89	3559.84	2538.61	BIRC5
ENSG00000089692	17.3297	43.0136	12.849	19.2423	LAG3
ENSG00000089693	5603.72	5244.58	5600.12	4719.86	MLF 2.00
ENSG00000089723	28.4206	32.2602	39.2232	38.4846	OTUB2
ENSG00000089737	1610.97	1608.4	1562.84	1392.32	DDX24
ENSG00000089775	152.501	155.156	222.49	243.278	ZBTB25
ENSG00000089818	497.708	459.323	450.39	478.309	NECAP1
ENSG00000089820	572.572	654.421	565.354	739.454	ARHGAP4
ENSG00000089847	33.273	36.8688	29.7555	42.6079	ANKRD24
ENSG00000089876	1049.48	990.848	1029.27	973.11	DHX32
ENSG00000089902	632.879	659.029	505.167	490.679	RCOR1
ENSG00000089916	909.461	886.387	828.42	907.137	GPATCH2L
ENSG00000090006	108.137	172.054	115.641	169.057	LTBP4
ENSG00000090013	903.222	640.595	1187.51	901.639	BLVRB
ENSG00000090020	148.342	224.285	271.857	307.877	SLC9A1
ENSG00000090054	3371.66	3348.91	2980.28	2952.32	SPTLC1
ENSG00000090060	4336.57	3874.29	3154.08	2861.6	PAPOLA
ENSG00000090061	259.252	334.891	348.951	344.987	CCNK
ENSG00000090097	873.415	867.952	1360.64	1215.01	PCBP4
ENSG00000090238	37.4321	30.724	440.246	248.775	YPEL3
ENSG00000090263	684.175	551.495	645.83	511.295	MRPS33
ENSG00000090266	2357.53	1963.26	1923.96	1560	NDUFB2
ENSG00000090273	2166.21	2161.43	2022.7	1727.68	NUDC
ENSG00000090316	2726.3	2634.58	2278.32	2417.66	MAEA
ENSG00000090339	0	3.0724	110.231	61.8502	ICAM1
ENSG00000090372	2034.5	2499.4	2101.82	2260.97	STRN4
ENSG00000090432	537.22	596.045	425.368	393.093	MUL1
ENSG00000090447	283.513	313.385	230.605	192.423	TFAP4
ENSG00000090470	719.528	549.959	696.549	603.383	PDCD7
ENSG00000090487	2349.21	2044.68	2091.68	1817.02	SPG21
ENSG00000090520	746.562	880.242	772.29	775.19	DNAJB11
ENSG00000090530	68.6255	199.706	100.087	104.458	P3H2
ENSG00000090539	13.8637	30.724	20.2878	21.9912	CHRD
ENSG00000090565	1441.13	1563.85	1359.29	1606.73	RAB11FIP3
ENSG00000090581	668.925	775.78	792.578	776.564	GNPTG
ENSG00000090612	587.129	546.887	512.606	519.542	ZNF268
ENSG00000090615	924.711	1084.56	910.248	1205.39	GOLGA3
ENSG00000090621	8415.28	6820.72	7341.49	6310.1	PABPC4
ENSG00000090661	430.469	404.02	345.57	325.745	CERS4
ENSG00000090674	282.127	327.21	294.85	290.009	MCOLN1
ENSG00000090686	1191.59	1316.52	1182.78	1204.02	USP48
ENSG00000090776	363.923	359.471	940.68	886.52	EFNB1
ENSG00000090857	717.448	975.486	803.398	1081.69	PDPR
ENSG00000090861	3321.75	3779.05	4803.48	4585.16	AARS
ENSG00000090863	1558.98	1924.86	1152.35	1452.79	GLG1
ENSG00000090889	1703.85	1795.82	1500.62	1144.92	KIF4A
ENSG00000090905	1329.53	1551.56	1205.77	1452.79	TNRC6A
ENSG00000090924	571.879	806.504	650.563	905.762	PLEKHG2
ENSG00000090971	454.037	517.699	392.908	410.961	NAT14
ENSG00000090975	132.399	221.213	129.166	193.797	PITPNM2
ENSG00000090989	706.357	611.407	605.254	527.789	EXOC1
ENSG00000091009	657.834	522.308	557.916	486.555	RBM27
ENSG00000091039	2486.46	2441.02	2485.94	2299.45	OSBPL8
ENSG00000091073	124.08	150.548	199.497	202.044	DTX2
ENSG00000091106	7.62505	12.2896	6.76261	17.8678	NLRC4
ENSG00000091127	677.936	745.057	612.017	556.652	PUS7
ENSG00000091129	13414.5	13982.5	12048.9	13648.3	NRCAM
ENSG00000091136	9283.15	9630.43	7073.69	8557.32	LAMB1
ENSG00000091140	3839.56	3451.84	3460.43	2990.8	DLD
ENSG00000091157	165.672	207.387	151.483	171.806	WDR7
ENSG00000091164	1448.07	1070.73	1257.85	1028.09	TXNL1
ENSG00000091262	12.4774	16.8982	14.2015	16.4934	ABCC6
ENSG00000091317	1893.79	1937.15	1719.06	1528.39	CMTM6
ENSG00000091409	965.609	1382.58	1049.56	1298.86	ITGA6
ENSG00000091428	50.6026	43.0136	37.8706	43.9824	RAPGEF4
ENSG00000091436	2216.12	2224.42	2246.54	2205.99	MAP3K20
ENSG00000091483	3401.47	2900.34	2884.25	2542.73	FH
ENSG00000091490	1493.12	1709.79	1958.45	2221.11	SEL1L3
ENSG00000091527	2659.76	2674.52	2482.56	2302.2	CDV3
ENSG00000091542	1498.67	1485.5	1313.3	1232.88	ALKBH5
ENSG00000091592	9.70461	23.043	56.806	30.2379	NLRP1
ENSG00000091622	398.582	407.093	686.405	628.124	PITPNM3
ENSG00000091640	1098.01	978.559	1156.41	946.996	SPAG7
ENSG00000091651	585.743	611.407	800.693	652.864	ORC6
ENSG00000091656	1097.31	1198.24	795.283	926.379	ZFHX4
ENSG00000091732	944.813	812.649	817.6	791.683	ZC3HC1
ENSG00000091844	409.673	387.122	374.649	401.339	RGS17
ENSG00000091947	657.141	563.785	712.779	610.256	TMEM101
ENSG00000091986	111.603	141.33	81.1514	78.3436	CCDC80
ENSG00000092010	1651.17	1330.35	1552.7	1177.9	PSME1
ENSG00000092020	285.593	202.778	243.454	193.797	PPP2R3C
ENSG00000092036	362.537	331.819	518.692	431.577	HAUS4
ENSG00000092094	264.104	259.618	211.67	290.009	OSGEP
ENSG00000092096	11.7842	13.8258	15.554	16.4934	SLC22A17
ENSG00000092098	248.854	333.355	272.533	309.251	RNF31
ENSG00000092108	643.97	669.783	605.254	483.806	SCFD1
ENSG00000092140	480.378	505.409	274.562	303.753	G2E3
ENSG00000092148	2542.61	2345.78	2445.36	2326.94	HECTD1
ENSG00000092199	15784.5	12252.7	12973.4	9901.54	HNRNPC
ENSG00000092201	2903.07	3233.7	3151.38	3100.76	SUPT16H
ENSG00000092203	1075.83	995.457	995.457	838.414	TOX4
ENSG00000092208	153.194	129.041	146.072	105.833	GEMIN2
ENSG00000092295	11.091	12.2896	20.2878	20.6167	TGM1
ENSG00000092330	368.775	327.21	394.26	346.361	TINF2
ENSG00000092421	3980.97	4448.83	2453.48	3077.39	SEMA6A
ENSG00000092439	1712.86	1474.75	1796.15	1700.19	TRPM7
ENSG00000092445	726.459	797.287	952.176	956.617	TYRO3
ENSG00000092470	628.027	706.652	1116.51	1045.96	WDR76
ENSG00000092529	54.0685	23.043	35.8419	28.8634	CAPN3
ENSG00000092531	800.63	562.249	670.175	500.3	SNAP23
ENSG00000092607	2.07956	3.0724	21.6404	13.7445	TBX15
ENSG00000092621	3857.58	4325.94	6446.8	6466.79	PHGDH
ENSG00000092758	18.716	32.2602	10.1439	19.2423	COL9A3
ENSG00000092820	11240	9665.76	9923.46	8062.52	EZR
ENSG00000092841	15218.2	11097.5	14768.2	10594.3	MYL6
ENSG00000092847	1217.24	1146	1008.31	981.357	AGO1
ENSG00000092853	1018.29	987.776	1485.75	1312.6	CLSPN
ENSG00000092871	355.605	440.889	331.368	399.965	RFFL
ENSG00000092929	2611.93	2775.91	3430	3569.45	UNC13D
ENSG00000092931	415.219	479.294	431.455	500.3	MFSD11
ENSG00000092964	1943	1731.3	1822.52	1573.75	DPYSL2
ENSG00000092978	474.833	420.919	509.225	454.943	GPATCH2
ENSG00000093000	2245.92	2666.84	2288.47	2318.7	NUP50
ENSG00000093009	863.017	917.111	1387.69	1334.59	CDC45
ENSG00000093010	2153.04	2245.92	2350.68	2324.19	COMT
ENSG00000093144	2069.16	1772.77	1622.35	1395.07	ECHDC1
ENSG00000093167	1952.01	1817.32	2402.08	1862.38	LRRFIP2
ENSG00000093183	1603.34	1717.47	1578.39	1525.64	SEC22C
ENSG00000093217	113.683	130.577	133.9	156.687	XYLB
ENSG00000094631	1326.07	1433.27	1194.28	1333.22	HDAC6
ENSG00000094804	1147.92	1155.22	2273.59	1937.97	CDC6
ENSG00000094841	434.628	305.704	250.893	251.524	UPRT
ENSG00000094880	2048.37	2144.53	2159.98	2057.55	CDC23
ENSG00000094914	898.37	917.111	768.233	868.652	AAAS
ENSG00000094916	6068.15	6049.55	7475.39	7020.69	CBX5
ENSG00000094975	1612.35	1620.69	1460.05	1503.65	SUCO
ENSG00000095002	2245.23	2075.4	2573.85	2065.8	MSH2
ENSG00000095015	968.382	824.939	789.197	680.353	MAP3K1
ENSG00000095059	1109.79	1124.5	1201.04	1175.15	DHPS
ENSG00000095066	185.081	196.633	230.605	290.009	HOOK2
ENSG00000095139	2724.92	2739.04	2812.57	2469.89	ARCN1
ENSG00000095203	149.728	193.561	226.548	255.648	EPB41L4B
ENSG00000095209	1102.17	1219.74	1108.39	1069.32	TMEM38B
ENSG00000095261	2020.64	1735.9	1770.45	1558.63	PSMD5
ENSG00000095303	15.2501	21.5068	18.2591	21.9912	PTGS1
ENSG00000095319	2293.06	2829.68	1946.28	2377.8	NUP188
ENSG00000095321	1572.84	1471.68	1896.24	1774.41	CRAT
ENSG00000095380	921.245	1000.07	984.637	909.886	NANS
ENSG00000095383	1192.97	1322.67	2734.8	2622.45	TBC1D2
ENSG00000095397	417.298	457.787	539.657	574.52	WHRN
ENSG00000095464	4.85231	1.5362	48.6908	27.489	PDE6C
ENSG00000095485	688.334	537.67	667.47	541.533	CWF19L1
ENSG00000095539	45.7503	92.1719	50.0433	74.2203	SEMA4G
ENSG00000095564	2992.49	3428.8	3315.71	3950.17	BTAF1
ENSG00000095574	266.184	201.242	284.03	219.912	IKZF5
ENSG00000095585	0	0	71.6837	26.1145	BLNK
ENSG00000095587	55.4549	90.6357	59.511	74.2203	TLL2
ENSG00000095637	22.8752	21.5068	142.015	86.5903	SORBS1
ENSG00000095713	202.41	308.776	185.972	324.37	CRTAC1
ENSG00000095739	164.285	192.025	242.778	250.15	BAMBI
ENSG00000095777	282.127	274.98	592.405	574.52	MYO3A
ENSG00000095787	3681.51	3222.95	3366.43	3096.64	WAC
ENSG00000095794	305.002	244.256	215.051	203.419	CREM
ENSG00000095906	1242.88	1399.48	1304.51	1286.49	NUBP2
ENSG00000095932	164.285	55.3032	58.1585	45.3568	SMIM24
ENSG00000095951	212.115	250.4	302.289	317.498	HIVEP1
ENSG00000096060	255.093	348.717	371.267	393.093	FKBP5
ENSG00000096063	2003.31	2021.64	1800.21	1777.16	SRPK1
ENSG00000096070	625.947	814.185	837.888	952.494	BRPF3
ENSG00000096080	684.868	603.726	712.103	580.018	MRPS18A
ENSG00000096092	716.755	503.873	581.585	431.577	TMEM14A
ENSG00000096093	632.186	697.434	665.441	929.128	EFHC1
ENSG00000096384	47542.9	43540.5	33170.6	30125.2	HSP90AB1
ENSG00000096401	2467.74	1823.47	2405.46	1773.04	CDC5L
ENSG00000096433	7250.04	9169.57	7948.78	9354.51	ITPR3
ENSG00000096654	247.468	196.633	231.281	166.308	ZNF184
ENSG00000096696	4559.09	5121.69	5338.41	5642.12	DSP
ENSG00000096717	559.402	548.423	561.297	544.282	SIRT1
ENSG00000096746	4005.23	3814.38	3217.65	2871.23	HNRNPH3
ENSG00000096872	19.4092	12.2896	18.9353	8.2467	IFT74
ENSG00000096968	126.16	139.794	110.907	120.952	JAK2
ENSG00000097007	3568.52	4448.83	3358.99	4264.92	ABL1
ENSG00000097021	1210.3	1238.18	1205.1	1154.54	ACOT7
ENSG00000097033	2808.79	2258.21	2427.1	2175.75	SH3GLB1
ENSG00000097046	441.56	528.452	612.017	629.498	CDC7
ENSG00000097096	93.5802	159.765	91.9715	112.705	SYDE2
ENSG00000099139	415.912	554.568	423.34	516.793	PCSK5
ENSG00000099194	3375.82	3576.27	2260.74	2280.21	SCD
ENSG00000099203	150.421	213.532	225.871	203.419	TMED1
ENSG00000099204	2324.95	2026.25	3342.08	2806.63	ABLIM1
ENSG00000099219	941.347	1164.44	914.305	1041.83	ERMP1
ENSG00000099246	3266.29	2929.53	2988.4	2496	RAB18
ENSG00000099250	531.674	586.828	543.714	607.507	NRP1
ENSG00000099251	31.8866	49.1584	99.4104	115.454	HSD17B7P2
ENSG00000099282	208.649	253.473	210.317	250.15	TSPAN15
ENSG00000099284	383.332	396.339	415.901	415.084	H2AFY2
ENSG00000099290	1277.54	1253.54	957.586	1055.58	WASHC2A
ENSG00000099308	255.786	222.749	267.799	318.872	MAST3
ENSG00000099326	652.982	980.095	660.707	1056.95	MZF1
ENSG00000099330	142.103	113.679	165.008	111.33	OCEL1
ENSG00000099331	1444.6	2010.88	1704.85	2138.64	MYO9B
ENSG00000099338	14.5569	3.0724	14.2015	26.1145	CATSPERG
ENSG00000099341	3106.86	2765.16	3320.44	2522.12	PSMD8
ENSG00000099364	1309.43	1410.23	1165.2	1370.33	FBXL19
ENSG00000099365	32.5798	44.5498	43.957	54.978	STX1B
ENSG00000099377	201.024	162.837	245.483	204.793	HSD3B7
ENSG00000099381	835.983	1178.26	865.615	1168.28	SETD1A
ENSG00000099385	907.381	612.943	1188.87	806.802	BCL7C
ENSG00000099617	58.2277	79.8823	82.5039	89.3392	EFNA2
ENSG00000099622	2327.72	2173.72	2790.25	2610.08	CIRBP
ENSG00000099624	4008.7	3628.5	4102.88	3709.64	ATP5F1D
ENSG00000099625	30.5002	29.1878	30.4318	45.3568	CBARP
ENSG00000099725	296.684	425.527	499.757	694.097	PRKY
ENSG00000099783	8983	9306.29	6960.76	6579.49	HNRNPM
ENSG00000099785	61.6936	89.0995	80.4751	76.9692	MARCH2
ENSG00000099795	2574.49	1891.06	2335.81	1726.31	NDUFB7
ENSG00000099797	2577.96	2490.18	2300.64	2309.08	TECR
ENSG00000099800	2053.22	2066.19	1773.83	1553.13	TIMM13
ENSG00000099804	1226.94	1121.43	1192.25	1007.47	CDC34
ENSG00000099810	702.891	809.577	687.758	742.203	MTAP
ENSG00000099812	28.4206	38.405	42.6045	41.2335	MISP
ENSG00000099814	678.63	1164.44	1223.36	1597.11	CEP170B
ENSG00000099817	3747.37	4049.42	3094.57	3231.33	POLR2E
ENSG00000099821	1312.9	1642.2	1043.47	1341.46	POLRMT
ENSG00000099822	285.593	308.776	392.908	417.833	HCN2
ENSG00000099834	25.6479	27.6516	40.5757	38.4846	CDHR5
ENSG00000099840	19.4092	27.6516	29.7555	74.2203	IZUMO4
ENSG00000099849	874.801	992.385	829.773	975.859	RASSF7
ENSG00000099860	876.881	1076.88	1407.3	1456.92	GADD45B
ENSG00000099864	397.889	284.197	843.974	718.837	PALM
ENSG00000099866	5.54549	15.362	14.2015	23.3656	MADCAM1
ENSG00000099875	2223.05	1992.45	3111.48	2809.38	MKNK2
ENSG00000099889	289.752	474.685	1214.57	1132.55	ARVCF
ENSG00000099899	948.279	996.993	979.903	1025.34	TRMT2A
ENSG00000099901	4044.05	4095.51	4132.63	3448.49	RANBP1
ENSG00000099904	649.516	990.848	793.255	1194.4	ZDHHC8
ENSG00000099910	399.275	348.717	415.224	536.035	KLHL22
ENSG00000099917	1939.54	2230.56	2131.58	2348.93	MED15
ENSG00000099940	715.368	634.45	935.946	706.467	SNAP29
ENSG00000099942	2802.55	3367.35	2888.99	3268.44	CRKL
ENSG00000099949	889.358	1299.62	862.909	1216.39	LZTR1
ENSG00000099953	56.1481	27.6516	54.1009	34.3612	MMP11
ENSG00000099954	51.2958	47.6222	31.108	59.1013	CECR2
ENSG00000099956	2558.55	2259.75	2506.22	2184	SMARCB1
ENSG00000099957	41.5912	75.2738	47.3383	67.348	P2RX6
ENSG00000099958	56.1481	70.6652	101.439	133.322	DERL3
ENSG00000099968	2685.4	2035.46	2866.67	2487.75	BCL2L13
ENSG00000099974	123.387	122.896	102.115	125.075	DDTL
ENSG00000099977	1396.77	1328.81	1516.18	1313.97	DDT
ENSG00000099991	1916.66	2162.97	1471.54	1811.52	CABIN1
ENSG00000099992	332.036	345.645	388.174	329.868	TBC1D10A
ENSG00000099994	11.7842	12.2896	23.6691	20.6167	SUSD2
ENSG00000099995	3642	4032.52	3833.05	3712.39	SF3A1
ENSG00000099999	344.514	437.817	390.879	446.696	RNF215
ENSG00000100003	1086.22	843.373	1130.03	974.485	SEC14L2
ENSG00000100014	446.412	542.278	486.232	603.383	SPECC1L
ENSG00000100023	798.551	987.776	716.837	804.053	PPIL2
ENSG00000100027	80.4096	58.3756	132.547	115.454	YPEL1
ENSG00000100028	2913.46	2746.72	2526.51	2204.62	SNRPD3
ENSG00000100029	4497.39	4216.87	3826.96	3497.97	PES 1.00
ENSG00000100030	3430.58	3487.17	3394.16	3114.5	MAPK1
ENSG00000100031	2654.21	2737.51	2210.02	2544.11	GGT1
ENSG00000100033	9.70461	6.1448	35.8419	28.8634	PRODH
ENSG00000100034	854.006	831.084	871.025	805.428	PPM1F
ENSG00000100036	126.16	125.968	100.763	123.7	SLC35E4
ENSG00000100038	49.2162	58.3756	43.2807	72.8458	TOP3B
ENSG00000100055	74.8641	55.3032	65.5974	97.5859	CYTH4
ENSG00000100056	427.696	400.948	484.879	463.19	ESS2
ENSG00000100058	539.299	522.308	641.772	538.784	CRYBB2P1
ENSG00000100060	35.3525	105.998	45.3095	125.075	MFNG
ENSG00000100065	1850.81	2631.51	2122.11	2970.19	CARD10
ENSG00000100068	92.887	195.097	124.432	171.806	LRP5L
ENSG00000100075	3552.58	3239.84	3835.08	3583.19	SLC25A1
ENSG00000100077	148.342	162.837	153.511	149.815	GRK3
ENSG00000100079	34.6593	12.2896	15.554	16.4934	LGALS2
ENSG00000100083	1087.61	1299.62	1029.95	1241.13	GGA1
ENSG00000100084	372.241	402.484	311.756	371.101	HIRA
ENSG00000100092	13.8637	26.1154	16.9065	19.2423	SH3BP1
ENSG00000100097	19403	16371.3	15984.8	13106.8	LGALS1
ENSG00000100099	712.596	869.489	789.197	1033.59	HPS4
ENSG00000100100	44.3639	18.4344	37.1944	19.2423	PIK3IP1
ENSG00000100104	325.798	373.296	332.044	284.511	SRRD
ENSG00000100105	803.403	889.459	929.859	968.987	PATZ1
ENSG00000100106	2678.47	2725.22	3139.88	3246.45	TRIOBP
ENSG00000100109	695.266	714.333	680.995	669.357	TFIP11
ENSG00000100116	54.7617	61.448	66.9499	38.4846	GCAT
ENSG00000100124	583.663	516.163	584.29	463.19	ANKRD54
ENSG00000100129	4686.63	3881.97	4964.43	4379	EIF3L
ENSG00000100138	2958.52	2324.27	2594.81	2085.04	SNU13
ENSG00000100139	900.449	989.312	3205.48	2560.6	MICALL1
ENSG00000100147	56.1481	52.2308	57.4822	41.2335	CCDC134
ENSG00000100150	713.289	711.26	618.779	760.071	DEPDC5
ENSG00000100151	676.55	741.984	813.542	843.912	PICK1
ENSG00000100154	603.765	722.014	575.498	673.48	TTC28
ENSG00000100156	9.70461	13.8258	15.554	35.7357	SLC16A8
ENSG00000100162	408.98	467.004	727.657	665.234	CENPM
ENSG00000100167	36.0457	44.5498	75.7413	68.7225	SEPT3
ENSG00000100196	152.501	119.824	317.167	243.278	KDELR3
ENSG00000100197	5.54549	13.8258	7.43887	20.6167	CYP2D6
ENSG00000100201	13260	13458.6	13667.9	14481.2	DDX17
ENSG00000100206	11.7842	3.0724	22.9929	15.1189	DMC1
ENSG00000100207	1241.5	1445.56	1158.44	1388.19	TCF20
ENSG00000100209	210.729	129.041	221.137	131.947	HSCB
ENSG00000100211	430.469	328.747	447.685	314.749	CBY1
ENSG00000100216	2902.37	2164.5	2373	1656.21	TOMM22
ENSG00000100218	33.273	13.8258	24.3454	24.7401	RSPH14
ENSG00000100219	1339.24	1430.2	1968.6	1944.85	XBP1
ENSG00000100220	2019.25	1904.89	1715	1568.25	RTCB
ENSG00000100221	1387.76	1433.27	1878.65	1832.14	JOSD1
ENSG00000100225	2211.26	2118.42	2065.98	2021.82	FBXO7
ENSG00000100226	650.902	655.957	872.377	794.432	GTPBP1
ENSG00000100227	2829.59	2795.88	2573.17	2522.12	POLDIP3
ENSG00000100228	250.24	221.213	254.274	265.269	RAB36
ENSG00000100234	124.08	213.532	173.123	127.824	TIMP3
ENSG00000100239	1242.19	1488.58	1267.31	1412.93	PPP6R2
ENSG00000100241	4575.72	4923.52	4859.61	5440.07	SBF1
ENSG00000100242	1590.86	2195.23	1272.05	1619.1	SUN2
ENSG00000100243	3032.69	3138.45	3279.19	2964.69	CYB5R3
ENSG00000100246	414.526	322.602	476.088	360.106	DNAL4
ENSG00000100253	273.809	168.982	238.72	255.648	MIOX
ENSG00000100258	1538.87	2058.51	2533.28	3151.61	LMF2
ENSG00000100263	427.003	531.525	423.34	505.798	RHBDD3
ENSG00000100266	6861.85	5839.09	5907.14	5459.31	PACSIN2
ENSG00000100271	142.796	112.143	142.691	147.066	TTLL1
ENSG00000100280	1834.17	2080.01	1817.79	1887.12	AP1B1
ENSG00000100281	1164.55	1170.58	1270.7	1293.36	HMGXB4
ENSG00000100284	905.995	659.029	919.715	691.348	TOM1
ENSG00000100288	40.2048	89.0995	71.0074	101.709	CHKB
ENSG00000100290	8.31824	9.21719	89.9428	37.1101	BIK
ENSG00000100292	17844.7	19551.2	18011.5	19250.5	HMOX1
ENSG00000100294	456.117	497.728	486.232	439.824	MCAT
ENSG00000100296	2105.9	1808.11	2089.65	1819.77	THOC5
ENSG00000100297	2118.38	2547.02	3386.04	3485.6	MCM5
ENSG00000100299	199.638	258.081	284.706	386.22	ARSA
ENSG00000100300	2790.08	2606.93	2839.62	2596.34	TSPO
ENSG00000100302	61.0004	93.7081	146.749	147.066	RASD2
ENSG00000100304	1660.18	1995.52	1828.61	1972.34	TTLL12
ENSG00000100307	65.8527	69.129	104.144	112.705	CBX7
ENSG00000100311	1219.32	1579.21	1472.22	1907.74	PDGFB
ENSG00000100314	10.3978	7.68099	10.8202	12.37	CABP7
ENSG00000100316	47089.5	37724.4	52646.3	41399.8	RPL3
ENSG00000100319	345.9	282.661	320.548	273.516	ZMAT5
ENSG00000100320	2677.78	2748.26	2220.17	2087.79	RBFOX2
ENSG00000100321	314.013	328.747	481.498	467.313	SYNGR1
ENSG00000100324	616.936	648.276	554.534	549.78	TAB1
ENSG00000100325	1042.55	1106.06	1078.64	982.732	ASCC2
ENSG00000100330	135.171	170.518	178.533	167.683	MTMR3
ENSG00000100335	1612.35	1589.97	1437.73	1472.04	MIEF1
ENSG00000100342	628.027	766.563	864.938	1081.69	APOL1
ENSG00000100345	55355.8	62477.2	63119.5	63414.4	MYH9
ENSG00000100347	1977.66	1614.55	1915.85	1575.12	SAMM50
ENSG00000100348	2396.35	1964.8	2634.71	2287.08	TXN2
ENSG00000100350	476.912	559.176	706.017	839.789	FOXRED2
ENSG00000100353	7071.2	6094.1	7677.6	6204.27	EIF3D
ENSG00000100354	900.449	668.247	567.383	558.027	TNRC6B
ENSG00000100359	998.189	1258.15	1029.27	1259	SGSM3
ENSG00000100360	308.468	301.095	225.195	274.89	IFT27
ENSG00000100364	3767.47	4241.45	3749.19	4357.01	KIAA0930
ENSG00000100372	566.333	442.425	611.34	566.273	SLC25A17
ENSG00000100376	164.978	132.113	175.828	174.555	FAM118A
ENSG00000100379	343.821	377.905	377.354	344.987	KCTD17
ENSG00000100380	11757.1	9246.38	10593.6	8637.04	ST13
ENSG00000100387	1608.89	1248.93	1519.56	1190.27	RBX1
ENSG00000100393	2131.55	2514.76	1873.24	2186.75	EP300
ENSG00000100395	500.481	569.93	582.937	619.877	L3MBTL2
ENSG00000100401	3570.6	4301.36	4250.3	4211.31	RANGAP1
ENSG00000100403	4028.8	4582.48	4961.05	4976.88	ZC3H7B
ENSG00000100410	696.652	741.984	885.902	714.714	PHF5A
ENSG00000100412	5163.55	4680.8	4334.16	4215.44	ACO2
ENSG00000100413	910.847	1032.33	677.614	782.062	POLR3H
ENSG00000100416	1078.6	1427.13	808.809	1081.69	TRMU
ENSG00000100417	1166.63	863.344	1230.12	1106.43	PMM1
ENSG00000100418	1428.66	1238.18	1163.17	1153.16	DESI1
ENSG00000100422	1009.97	993.921	1115.83	1114.68	CERK
ENSG00000100425	781.221	1035.4	860.204	1073.45	BRD1
ENSG00000100426	979.473	1156.76	842.622	1125.67	ZBED4
ENSG00000100429	153.194	262.69	152.159	313.375	HDAC10
ENSG00000100439	385.412	350.253	607.959	522.291	ABHD4
ENSG00000100441	556.629	652.885	578.203	647.366	KHNYN
ENSG00000100442	1283.09	1244.32	1185.49	1008.85	FKBP3
ENSG00000100445	167.058	247.328	171.77	181.427	SDR39U1
ENSG00000100461	850.54	863.344	803.398	757.322	RBM23
ENSG00000100462	1118.11	1109.14	844.65	720.212	PRMT5
ENSG00000100473	56.8413	73.7376	152.159	167.683	COCH
ENSG00000100478	61.6936	27.6516	58.1585	54.978	AP4S1
ENSG00000100479	76.9437	86.0271	117.669	100.335	POLE2
ENSG00000100483	58.2277	72.2014	50.0433	61.8502	VCPKMT
ENSG00000100485	528.208	471.613	436.189	430.203	SOS 2
ENSG00000100490	13.8637	16.8982	22.9929	24.7401	CDKL1
ENSG00000100503	1188.12	1488.58	1093.51	1338.71	NIN
ENSG00000100504	177.456	258.081	322.577	292.758	PYGL
ENSG00000100505	390.264	434.744	411.843	438.45	TRIM9
ENSG00000100519	1265.07	1069.19	1048.21	914.009	PSMC6
ENSG00000100522	732.698	734.303	616.75	571.771	GNPNAT1
ENSG00000100523	212.808	247.328	162.979	236.405	DDHD1
ENSG00000100526	353.525	299.559	205.583	140.194	CDKN3
ENSG00000100528	1383.6	1201.31	1316	1094.06	CNIH1
ENSG00000100532	97.7393	90.6357	110.907	83.8414	CGRRF1
ENSG00000100554	1029.38	797.287	950.823	808.177	ATP6V1D
ENSG00000100557	408.287	308.776	198.145	191.049	CCDC198
ENSG00000100564	94.2734	78.3461	65.5974	54.978	PIGH
ENSG00000100567	1428.66	1261.22	1174.67	945.621	PSMA3
ENSG00000100568	923.324	864.88	843.974	764.194	VTI1B
ENSG00000100575	470.674	385.586	564.678	427.454	TIMM9
ENSG00000100577	189.24	162.837	224.519	174.555	GSTZ1
ENSG00000100578	175.376	162.837	117.669	107.207	KIAA0586
ENSG00000100580	377.093	330.283	385.469	364.229	TMED8
ENSG00000100583	15.9433	10.7534	8.11514	17.8678	SAMD15
ENSG00000100591	1709.4	1768.17	1127.33	1055.58	AHSA1
ENSG00000100592	504.64	396.339	568.06	454.943	DAAM1
ENSG00000100596	2083.03	2009.35	1771.13	2061.67	SPTLC2
ENSG00000100599	164.285	190.489	222.49	269.392	RIN3
ENSG00000100600	449.185	428.6	403.052	476.934	LGMN
ENSG00000100601	142.796	141.33	150.13	115.454	ALKBH1
ENSG00000100603	1380.83	1119.89	1302.48	981.357	SNW1
ENSG00000100605	320.252	420.919	359.095	394.467	ITPK1
ENSG00000100612	980.166	1023.11	978.55	929.128	DHRS7
ENSG00000100614	764.585	771.172	814.895	790.309	PPM1A
ENSG00000100625	41.5912	49.1584	43.957	34.3612	SIX4
ENSG00000100626	14.5569	9.21719	11.4964	15.1189	GALNT16
ENSG00000100629	108.83	150.548	108.202	120.952	CEP128
ENSG00000100632	2431.01	2559.31	2176.21	1774.41	ERH
ENSG00000100644	2984.17	2654.55	3183.84	2715.91	HIF1A
ENSG00000100647	94.9666	84.4909	461.887	395.842	SUSD6
ENSG00000100650	3238.57	2951.04	2786.2	2605.96	SRSF5
ENSG00000100664	4419.06	3728.35	3551.05	3110.38	EIF5
ENSG00000100697	496.322	798.823	551.153	728.458	DICER1
ENSG00000100711	555.242	497.728	565.354	464.564	ZFYVE21
ENSG00000100714	2826.81	2780.52	2950.53	2802.5	MTHFD1
ENSG00000100722	944.12	909.43	971.111	960.74	ZC3H14
ENSG00000100726	777.062	1193.63	893.341	1296.11	TELO2
ENSG00000100731	607.925	675.928	658.002	739.454	PCNX1
ENSG00000100744	472.753	377.905	401.023	302.379	GSKIP
ENSG00000100749	314.013	304.167	398.318	261.145	VRK1
ENSG00000100764	1192.97	1021.57	999.514	692.723	PSMC1
ENSG00000100767	582.97	741.984	731.039	881.022	PAPLN
ENSG00000100784	219.74	187.416	226.548	174.555	RPS6KA5
ENSG00000100796	1251.89	1307.31	1247.7	1333.22	PPP4R3A
ENSG00000100802	162.899	86.0271	146.749	122.326	C14orf93
ENSG00000100804	1680.28	1636.05	1627.08	1495.4	PSMB5
ENSG00000100811	2225.82	2149.14	1895.56	1830.77	YY1
ENSG00000100813	3777.17	3697.63	3188.57	3268.44	ACIN1
ENSG00000100814	675.164	485.439	856.823	599.26	CCNB1IP1
ENSG00000100815	678.63	674.391	520.045	541.533	TRIP11
ENSG00000100823	3605.96	3202.97	3105.39	2556.48	APEX1
ENSG00000100836	1958.25	1709.79	1799.53	1759.3	PABPN1
ENSG00000100852	1301.11	1248.93	1379.57	1283.74	ARHGAP5
ENSG00000100865	303.616	230.43	293.497	236.405	CINP
ENSG00000100867	17.3297	13.8258	10.8202	1.37445	DHRS2
ENSG00000100883	1316.36	1196.7	1255.14	1087.19	SRP54
ENSG00000100888	1188.12	1350.32	1098.92	1252.12	CHD8
ENSG00000100889	494.242	439.353	787.168	854.908	PCK2
ENSG00000100890	74.171	75.2738	64.2448	83.8414	KIAA0391
ENSG00000100897	688.334	533.061	563.326	500.3	DCAF11
ENSG00000100902	1110.48	1053.83	1025.89	720.212	PSMA6
ENSG00000100906	650.209	635.986	952.852	738.08	NFKBIA
ENSG00000100908	251.627	259.618	259.008	192.423	EMC9
ENSG00000100911	752.801	765.027	683.024	613.005	PSME2
ENSG00000100916	124.774	122.896	156.893	144.317	BRMS1L
ENSG00000100918	11.091	19.9706	18.2591	37.1101	REC8
ENSG00000100926	169.831	179.735	183.267	141.568	TM9SF1
ENSG00000100934	1448.76	1374.9	1039.41	1029.46	SEC23A
ENSG00000100938	736.857	648.276	756.736	607.507	GMPR2
ENSG00000100941	3868.67	3854.32	3887.15	4034.01	PNN
ENSG00000100949	239.843	258.081	332.044	357.357	RABGGTA
ENSG00000100979	8.31824	12.2896	15.554	16.4934	PLTP
ENSG00000100982	808.255	901.749	768.909	819.172	PCIF1
ENSG00000100983	1235.95	1161.37	1604.09	1377.2	GSS
ENSG00000100991	2229.29	2321.2	2199.2	2244.48	TRPC4AP
ENSG00000100994	4120.99	3932.67	3610.56	4006.52	PYGB
ENSG00000100997	2177.99	2017.03	2405.46	2067.17	ABHD12
ENSG00000101000	117.149	79.8823	214.375	142.943	PROCR
ENSG00000101003	603.072	628.305	830.449	787.56	GINS1
ENSG00000101004	1386.37	1626.83	1395.13	1910.49	NINL
ENSG00000101019	1464.01	1540.81	1895.56	2008.07	UQCC1
ENSG00000101040	2082.33	1866.48	1434.35	1386.82	ZMYND8
ENSG00000101049	483.151	301.095	289.44	313.375	SGK2
ENSG00000101052	898.37	665.174	747.945	613.005	IFT52
ENSG00000101057	1958.95	2141.46	3695.77	3157.11	MYBL2
ENSG00000101079	1505.6	1104.53	1176.69	967.613	NDRG3
ENSG00000101084	2110.75	1760.48	1932.75	1546.26	C20orf24
ENSG00000101096	99.8189	89.0995	167.037	148.441	NFATC2
ENSG00000101104	345.9	987.776	827.068	1829.39	PABPC1L
ENSG00000101109	987.791	940.154	1166.55	1066.57	STK4
ENSG00000101126	2674.31	3098.51	2377.06	2862.98	ADNP
ENSG00000101132	985.711	628.305	1084.72	640.494	PFDN4
ENSG00000101134	40.898	33.7964	45.3095	24.7401	DOK5
ENSG00000101138	1093.16	889.459	979.226	843.912	CSTF1
ENSG00000101146	1003.73	926.328	887.931	817.798	RAE1
ENSG00000101150	3090.92	3213.73	3250.79	3231.33	TPD52L2
ENSG00000101152	2019.95	2235.17	2325.66	2292.58	DNAJC5
ENSG00000101158	2333.96	2433.34	1890.15	2001.2	NELFCD
ENSG00000101160	3163.01	3365.81	3673.45	3555.7	CTSZ
ENSG00000101161	3297.49	2957.18	2831.51	2538.61	PRPF6
ENSG00000101162	13.1705	21.5068	4.73383	8.2467	TUBB1
ENSG00000101166	3161.62	2651.48	2920.77	2497.38	PRELID3B
ENSG00000101181	535.833	609.871	551.153	580.018	MTG2
ENSG00000101182	5890.01	5435.07	5133.5	4311.65	PSMA7
ENSG00000101187	1196.44	2095.38	1641.96	2434.15	SLCO4A1
ENSG00000101188	4.85231	7.68099	13.5252	17.8678	NTSR1
ENSG00000101189	894.904	970.878	843.298	875.525	MRGBP
ENSG00000101190	473.446	402.484	505.167	452.194	TCFL5
ENSG00000101191	2757.5	3434.94	2858.56	3694.52	DIDO1
ENSG00000101193	1182.58	1189.02	1050.91	1110.56	GID8
ENSG00000101197	99.1257	78.3461	162.303	155.313	BIRC7
ENSG00000101198	49.2162	73.7376	100.087	98.9604	NKAIN4
ENSG00000101199	1692.07	2264.36	2097.09	2838.24	ARFGAP1
ENSG00000101210	5455.38	5373.62	5739.43	5600.88	EEF1A2
ENSG00000101213	40.898	53.767	66.2736	65.9736	PTK6
ENSG00000101216	497.015	529.989	451.066	409.586	GMEB2
ENSG00000101220	832.517	929.4	747.945	710.591	C20orf27
ENSG00000101224	2289.6	2447.16	1535.11	1450.04	CDC25B
ENSG00000101230	9.01142	16.8982	30.4318	53.6035	ISM1
[truncated: 13,499 more rows]

## Sheet: Table S5 H28-atovaquone
ID	H28-AQ0-A	H28-AQ0-B	H28-AQ30-A	H28-AQ30-B	Gene.name
ENSG00000000003	580.312	413.247	500.385	345.107	TSPAN6
ENSG00000000419	1902.66	1502.48	1433.73	1185.54	DPM1
ENSG00000000457	278.74	308.848	279.174	234.47	SCYL3
ENSG00000000460	656.419	528.086	359.615	365.407	C1orf112
ENSG00000000971	21.8806	15.6599	5.91471	11.1652	CFH
ENSG00000001036	2234.68	2077.55	2803.57	2678.64	FUCA2
ENSG00000001084	1147.31	1426.79	1308.33	1653.47	GCLC
ENSG00000001167	1087.37	1154.48	842.255	904.383	NFYA
ENSG00000001461	38.0533	33.0598	57.9642	74.0965	NIPAL3
ENSG00000001497	2264.17	2194.99	1951.86	1941.73	LAS1L
ENSG00000001561	692.569	718.615	796.12	658.748	ENPP4
ENSG00000001617	365.311	413.247	424.676	503.45	SEMA3F
ENSG00000001626	18.0753	22.6198	7.09766	12.1802	CFTR
ENSG00000001629	4191.57	4143.78	4501.1	3923.05	ANKIB1
ENSG00000001630	416.683	440.217	467.262	445.594	CYP51A1
ENSG00000001631	1044.56	1108.37	946.354	989.645	KRIT1
ENSG00000002016	222.612	281.008	233.04	295.371	RAD52
ENSG00000002079	7.61065	9.56993	7.09766	17.2553	MYH16
ENSG00000002330	863.809	646.405	844.621	722.694	BAD
ENSG00000002549	3515.17	2642.17	2775.18	2332.52	LAP3
ENSG00000002586	4964.05	4058.52	4129.65	4229.59	CD99
ENSG00000002587	56.1286	47.8497	30.7565	34.5107	HS3ST1
ENSG00000002746	62.7879	90.4794	144.319	141.088	HECW1
ENSG00000002822	997.947	943.943	1330.81	1275.88	MAD1L1
ENSG00000002834	12493.8	12183.4	11745.4	11740.7	LASP1
ENSG00000002919	676.397	578.546	435.323	407.023	SNX11
ENSG00000003056	5068.69	4735.38	4704.56	4007.3	M6PR
ENSG00000003096	195.974	192.269	85.1719	96.4269	KLHL13
ENSG00000003137	345.333	477.627	157.331	359.317	CYP26B1
ENSG00000003147	68.4959	64.3796	145.502	144.133	ICA1
ENSG00000003249	701.131	712.525	799.669	863.782	DBNDD1
ENSG00000003393	2056.78	2165.41	2187.26	2076.73	ALS2
ENSG00000003400	159.824	121.799	196.368	173.568	CASP10
ENSG00000003402	3081.36	3958.47	3968.77	4900.52	CFLAR
ENSG00000003436	81.8145	56.5496	60.3301	32.4806	TFPI
ENSG00000003509	784.849	647.275	871.829	722.694	NDUFAF7
ENSG00000003756	2205.19	2588.23	2672.27	2929.35	RBM5
ENSG00000003987	41.8586	55.6796	27.2077	40.6008	MTMR7
ENSG00000003989	62.7879	86.1294	54.4154	65.9763	SLC7A2
ENSG00000004059	2676.1	1947.92	2302.01	1894.03	ARF5
ENSG00000004139	13.3186	14.7899	16.5612	27.4055	SARM1
ENSG00000004142	3700.68	3412.12	3245.99	3337.39	POLDIP2
ENSG00000004399	1086.42	1308.47	1278.76	1510.35	PLXND1
ENSG00000004455	6752.55	5825.48	5947.84	4983.75	AK2
ENSG00000004478	6754.45	6029.06	7007.75	6057.64	FKBP4
ENSG00000004487	2302.22	2014.04	1935.29	1676.81	KDM1A
ENSG00000004534	2205.19	2460.34	2280.71	2595.41	RBM6
ENSG00000004660	2072.95	2319.4	2658.07	3226.75	CAMKK1
ENSG00000004700	1384.19	1275.41	1061.1	1054.61	RECQL
ENSG00000004766	874.274	690.775	604.484	527.811	VPS50
ENSG00000004777	345.333	540.266	340.687	546.081	ARHGAP33
ENSG00000004779	1583.02	1050.95	1431.36	1014.01	NDUFAB1
ENSG00000004838	30.4426	37.4097	48.5006	55.8261	ZMYND10
ENSG00000004848	133.186	89.6094	133.673	117.742	ARX
ENSG00000004864	1827.51	1749.56	1022.06	1179.45	SLC25A13
ENSG00000004866	171.24	181.829	138.404	109.622	ST7
ENSG00000004897	4774.73	4711.02	3248.36	3287.65	CDC27
ENSG00000004961	1477.42	1184.06	1134.44	954.119	HCCS
ENSG00000004975	1940.72	1685.18	2557.52	2031.06	DVL2
ENSG00000005007	2670.39	3212.02	2408.47	2903.97	UPF1
ENSG00000005020	872.371	796.044	759.449	630.328	SKAP2
ENSG00000005022	16997.4	11671.8	15902.3	11316.5	SLC25A5
ENSG00000005059	649.759	495.897	508.665	479.09	MCUB
ENSG00000005075	1432.71	1037.9	1151	985.585	POLR2J
ENSG00000005100	1346.13	1614.71	1094.22	1347.95	DHX33
ENSG00000005108	29.4913	26.9698	10.6465	20.3004	THSD7A
ENSG00000005156	607.901	670.765	693.204	711.529	LIG3
ENSG00000005175	1327.11	1189.28	1039.81	904.383	RPAP3
ENSG00000005187	179.802	83.5194	292.187	136.013	ACSM3
ENSG00000005189	261.616	267.088	292.187	238.53	REXO5
ENSG00000005194	1642	1404.17	1259.83	1248.47	CIAPIN1
ENSG00000005206	803.875	1318.04	736.973	1499.18	SPPL2B
ENSG00000005238	649.759	498.507	1110.78	894.233	FAM214B
ENSG00000005249	1442.22	1312.82	635.24	660.778	PRKAR2B
ENSG00000005302	689.715	694.255	656.533	653.673	MSL3
ENSG00000005339	1724.76	2455.99	1976.7	2441.12	CREBBP
ENSG00000005436	736.331	713.395	817.413	643.523	GCFC2
ENSG00000005448	461.396	372.357	550.068	445.594	WDR54
ENSG00000005469	218.806	194.009	153.783	138.043	CROT
ENSG00000005483	2239.43	2640.43	2349.32	2377.18	KMT2E
ENSG00000005486	1056.93	915.234	759.449	931.789	RHBDD2
ENSG00000005513	273.032	248.818	288.638	242.59	SOX8
ENSG00000005700	4208.69	4099.41	4850.06	3997.15	IBTK
ENSG00000005801	577.458	630.746	561.898	501.42	ZNF195
ENSG00000005810	1193.92	1545.11	1155.73	1341.86	MYCBP2
ENSG00000005812	1856.05	1672.13	1751.94	1504.26	FBXL3
ENSG00000005882	1057.88	663.805	1140.36	751.115	PDK2
ENSG00000005884	14056.9	19874.1	38353.4	52593.3	ITGA3
ENSG00000005889	797.216	937.853	660.082	760.25	ZFX
ENSG00000005893	8637.14	7585.48	7860.65	6037.34	LAMP2
ENSG00000005961	4.75666	10.4399	11.8294	16.2403	ITGA2B
ENSG00000006007	1759.96	1385.9	1394.69	1113.48	GDE1
ENSG00000006015	1036.95	879.564	858.816	874.947	REX1BD
ENSG00000006016	72.3012	70.4695	72.1595	78.1566	CRLF1
ENSG00000006025	495.644	582.896	600.935	844.497	OSBPL7
ENSG00000006042	839.074	656.845	624.594	618.147	TMEM98
ENSG00000006062	857.15	1241.48	579.642	901.338	MAP3K14
ENSG00000006118	3525.63	3821.01	3974.69	4149.4	TMEM132A
ENSG00000006125	16030.9	14673.3	17100.6	14121	AP2B1
ENSG00000006194	1203.43	1238	1142.72	1247.46	ZNF263
ENSG00000006210	1008.41	1039.64	1316.62	1170.32	CX3CL1
ENSG00000006282	2329.81	2455.12	3245.99	3637.83	SPATA20
ENSG00000006283	109.403	147.899	72.1595	111.652	CACNA1G
ENSG00000006327	3992.74	3953.25	2738.51	4042.83	TNFRSF12A
ENSG00000006432	427.148	607.256	384.456	471.984	MAP3K9
ENSG00000006451	2305.08	1863.53	2414.39	1787.45	RALA
ENSG00000006453	1531.64	1661.69	2672.27	2502.02	BAIAP2L1
ENSG00000006459	161.726	207.059	268.528	366.422	KDM7A
ENSG00000006468	13.3186	25.2298	21.293	30.4506	ETV1
ENSG00000006530	808.632	769.945	712.131	694.274	AGK
ENSG00000006534	3113.71	2352.46	3490.86	2697.92	ALDH3B1
ENSG00000006576	1513.57	1563.38	935.708	951.074	PHTF2
ENSG00000006607	1227.22	1439.84	705.034	883.068	FARP2
ENSG00000006611	862.858	647.275	1242.09	936.864	USH1C
ENSG00000006625	970.358	832.584	757.083	658.748	GGCT
ENSG00000006634	1066.44	951.773	670.728	538.976	DBF4
ENSG00000006652	1567.79	1589.48	2867.45	2291.92	IFRD1
ENSG00000006695	1426.05	1148.39	1490.51	1186.56	COX10
ENSG00000006704	2164.28	2228.05	3400.96	3170.92	GTF2IRD1
ENSG00000006712	2049.17	1797.41	1882.06	1595.61	PAF1
ENSG00000006715	2901.56	2476	2464.07	2037.15	VPS41
ENSG00000006740	13.3186	15.6599	5.91471	9.13518	ARHGAP44
ENSG00000006744	2718.91	2653.48	2311.47	2491.87	ELAC2
ENSG00000006756	880.933	901.314	1033.89	1028.22	ARSD
ENSG00000006757	574.604	411.507	566.629	387.738	PNPLA4
ENSG00000006831	2439.21	2558.65	1962.5	2147.78	ADIPOR2
ENSG00000006837	34.2479	35.6698	57.9642	52.7811	CDKL3
ENSG00000007047	995.093	982.223	1534.28	1391.59	MARK4
ENSG00000007080	2013.02	1857.44	1730.64	1794.56	CCDC124
ENSG00000007168	4539.75	4880.67	4426.57	4455.94	PAFAH1B1
ENSG00000007174	13.3186	12.1799	16.5612	9.13518	DNAH9
ENSG00000007202	5194.27	6197.84	4414.74	5522.73	KIAA0100
ENSG00000007255	518.476	368.007	706.217	535.931	TRAPPC6A
ENSG00000007264	19.0266	21.7498	60.3301	51.766	MATK
ENSG00000007341	427.148	427.167	390.371	345.107	ST7L
ENSG00000007372	300.621	270.568	144.319	152.253	PAX6
ENSG00000007376	843.831	805.614	738.156	833.332	RPUSD1
ENSG00000007384	640.246	779.515	863.548	1244.41	RHBDF1
ENSG00000007392	1667.68	1680.83	1323.71	1483.96	LUC7L
ENSG00000007402	21.8806	20.0099	20.11	41.6158	CACNA2D2
ENSG00000007516	22.832	26.0998	28.3906	28.4206	BAIAP3
ENSG00000007520	1547.82	1473.77	1678.6	1531.67	TSR3
ENSG00000007541	852.393	926.544	747.62	987.615	PIGQ
ENSG00000007545	408.121	529.826	436.506	613.072	CRAMP1
ENSG00000007866	193.12	187.049	101.733	177.629	TEAD3
ENSG00000007923	1129.23	1201.46	1098.95	1227.16	DNAJC11
ENSG00000007944	112.257	80.9094	74.5254	64.9613	MYLIP
ENSG00000007952	10.4646	18.2699	10.6465	13.1953	NOX1
ENSG00000007968	238.784	264.478	93.4525	173.568	E2F2
ENSG00000008018	5162.88	3802.74	4035.02	3218.63	PSMB1
ENSG00000008083	269.227	260.998	283.906	287.251	JARID2
ENSG00000008086	960.845	1224.08	1009.05	850.587	CDKL5
ENSG00000008128	228.32	338.428	215.296	288.266	CDK11A
ENSG00000008130	828.61	824.754	811.499	915.548	NADK
ENSG00000008226	18.0753	20.8799	14.1953	22.3304	DLEC1
ENSG00000008256	552.724	614.216	777.193	689.199	CYTH3
ENSG00000008277	198.828	260.128	186.905	179.659	ADAM22
ENSG00000008282	3299.22	3038.89	3070.92	2578.15	SYPL1
ENSG00000008283	749.649	838.674	560.715	770.4	CYB561
ENSG00000008294	13798.1	13278.7	16066.7	13765.7	SPAG9
ENSG00000008300	81.8145	153.119	134.855	199.959	CELSR3
ENSG00000008311	120.819	127.889	140.77	138.043	AASS
ENSG00000008323	12.3673	6.95995	10.6465	11.1652	PLEKHG6
ENSG00000008324	846.685	597.686	674.277	505.48	SS18L2
ENSG00000008382	383.387	352.348	392.737	369.467	MPND
ENSG00000008394	1555.43	1140.56	1548.47	1285.02	MGST1
ENSG00000008405	723.012	716.005	425.859	526.796	CRY1
ENSG00000008441	146.505	256.648	231.857	347.137	NFIX
ENSG00000008513	1712.4	2160.19	1563.85	1823.99	ST3GAL1
ENSG00000008516	12.3673	34.7998	11.8294	47.706	MMP25
ENSG00000008517	3977.52	3146.77	4742.42	3856.06	IL32
ENSG00000008710	2066.29	3198.97	3521.62	4925.89	PKD1
ENSG00000008735	28.5399	33.9298	44.9518	68.0064	MAPK8IP2
ENSG00000008838	2076.76	2193.25	1766.13	2268.57	MED24
ENSG00000008853	476.617	552.446	409.298	549.126	RHOBTB2
ENSG00000008869	1088.32	1127.51	1384.04	1241.37	HEATR5B
ENSG00000008952	4894.6	4584	4484.54	3588.1	SEC62
ENSG00000008988	24063	15833.9	24664.4	17366	RPS20
ENSG00000009307	23888.9	20364.8	25197.9	19825.4	CSDE1
ENSG00000009335	4075.5	4208.16	3816.17	3904.78	UBE3C
ENSG00000009413	440.466	585.506	535.873	652.658	REV3L
ENSG00000009694	41.8586	44.3697	54.4154	66.9913	TENM1
ENSG00000009724	29.4913	43.4997	27.2077	29.4356	MASP2
ENSG00000009780	79.9118	70.4695	65.0618	69.0214	FAM76A
ENSG00000009830	442.369	557.666	467.262	581.607	POMT2
ENSG00000009844	2629.48	2004.47	2011	1550.95	VTA1
ENSG00000009954	6832.46	7850.83	6749.87	6886.91	BAZ1B
ENSG00000010017	1715.25	1441.58	1562.67	1267.76	RANBP9
ENSG00000010072	363.409	369.747	138.404	198.944	SPRTN
ENSG00000010165	2003.5	1886.15	1763.77	1793.54	METTL13
ENSG00000010219	270.178	326.248	274.443	339.017	DYRK4
ENSG00000010244	5638.54	5180.81	4031.47	4467.1	ZNF207
ENSG00000010256	15492.4	11212.5	16069.1	12554.8	UQCRC1
ENSG00000010270	2543.86	1802.63	2013.37	1349.98	STARD3NL
ENSG00000010278	170.288	113.969	249.601	227.365	CD9
ENSG00000010292	5772.68	5648.87	5447.45	4692.44	NCAPD2
ENSG00000010295	148.408	193.139	79.2572	134.998	IFFO1
ENSG00000010310	16.1726	21.7498	85.1719	80.1866	GIPR
ENSG00000010318	284.448	256.648	502.751	403.978	PHF7
ENSG00000010322	3769.18	4549.2	4046.85	5493.29	NISCH
ENSG00000010361	106.549	85.2594	144.319	114.697	FUZ
ENSG00000010379	16.1726	13.9199	5.91471	5.0751	SLC6A13
ENSG00000010404	3111.81	3186.79	4613.48	4087.49	IDS
ENSG00000010539	318.696	317.548	249.601	264.92	ZNF200
ENSG00000010626	194.072	130.499	298.102	188.794	LRRC23
ENSG00000010704	294.913	312.328	279.174	203.004	HFE
ENSG00000010803	563.188	641.186	778.376	799.836	SCMH1
ENSG00000010810	122.722	112.229	288.638	239.545	FYN
ENSG00000010818	405.267	575.936	315.846	370.482	HIVEP2
ENSG00000011007	905.668	918.714	772.462	801.866	ELOA
ENSG00000011009	1136.84	1035.29	1097.77	1005.89	LYPLA2
ENSG00000011021	245.444	301.018	363.163	430.369	CLCN6
ENSG00000011028	4953.58	6690.25	7079.91	9156.5	MRC2
ENSG00000011052	42.8099	35.6698	31.9394	26.3905	NME1-NME2
ENSG00000011105	1254.81	1140.56	1393.51	1187.57	TSPAN9
ENSG00000011114	965.601	1245.83	1054	1177.42	BTBD7
ENSG00000011132	386.241	384.537	404.566	486.195	APBA3
ENSG00000011143	332.015	294.058	395.103	352.212	MKS1
ENSG00000011198	592.68	512.426	302.833	390.783	ABHD5
ENSG00000011201	391.949	332.338	91.0866	57.8562	ANOS1
ENSG00000011243	1346.13	1201.46	1392.32	1302.27	AKAP8L
ENSG00000011258	1480.27	1365.89	1781.51	1338.81	MBTD1
ENSG00000011260	2571.45	2187.16	2068.97	1747.86	UTP18
ENSG00000011275	1976.87	1990.55	1869.05	1996.54	RNF216
ENSG00000011295	2551.47	2160.19	2559.89	2112.26	TTC19
ENSG00000011304	12678.4	12735	10408.7	11248.5	PTBP1
ENSG00000011332	33.2966	36.5397	18.9271	35.5257	DPF1
ENSG00000011347	18.0753	24.3598	18.9271	37.5558	SYT7
ENSG00000011376	1847.49	1941.83	1762.58	1657.53	LARS2
ENSG00000011405	2379.28	2750.92	2756.26	2470.56	PIK3C2A
ENSG00000011422	53.2746	66.1195	53.2324	112.667	PLAUR
ENSG00000011426	7979.77	7634.2	3941.56	3723.09	ANLN
ENSG00000011451	1747.6	2022.74	1733.01	2172.14	WIZ
ENSG00000011454	2365.96	2362.03	2802.39	2602.51	RABGAP1
ENSG00000011478	336.771	375.837	590.288	575.516	QPCTL
ENSG00000011485	2707.49	2432.5	1982.61	2198.53	PPP5C
ENSG00000011523	575.556	537.656	742.888	581.607	CEP68
ENSG00000011566	2401.16	2259.37	2387.18	2170.11	MAP4K3
ENSG00000011590	7.61065	13.0499	5.91471	19.2854	ZBTB32
ENSG00000011638	256.86	181.829	553.617	469.954	TMEM159
ENSG00000012048	1775.18	1963.58	1599.34	1717.41	BRCA1
ENSG00000012061	1387.99	1139.69	1477.5	1233.25	ERCC1
ENSG00000012124	54.2259	61.7696	108.831	88.3068	CD22
ENSG00000012171	702.083	608.996	1411.25	1507.31	SEMA3B
ENSG00000012174	1494.54	1512.05	1710.53	1562.12	MBTPS2
ENSG00000012211	350.09	381.927	512.214	486.195	PRICKLE3
ENSG00000012232	676.397	818.664	279.174	496.345	EXTL3
ENSG00000012504	121.77	67.8595	36.6712	16.2403	NR1H4
ENSG00000012660	4378.03	4280.37	3164.37	3059.27	ELOVL5
ENSG00000012779	182.656	175.739	431.774	453.714	ALOX5
ENSG00000012817	1171.09	1200.59	1122.61	1143.93	KDM5D
ENSG00000012822	974.163	863.034	1085.94	1036.34	CALCOCO1
ENSG00000012963	805.778	681.205	512.214	573.486	UBR7
ENSG00000012983	900.911	998.753	754.717	802.881	MAP4K5
ENSG00000013275	1990.19	1716.5	1366.3	1510.35	PSMC4
ENSG00000013288	715.401	771.685	547.702	632.358	MAN2B2
ENSG00000013297	27.5886	30.4498	47.3177	35.5257	CLDN11
ENSG00000013306	4422.74	4070.7	4079.97	4076.32	SLC25A39
ENSG00000013364	6994.19	5489.66	9512.04	7540.59	MVP
ENSG00000013374	1342.33	1195.37	1539.01	1367.23	NUB1
ENSG00000013375	2182.35	1974.02	1885.61	1575.31	PGM3
ENSG00000013392	460.444	334.948	428.225	301.461	RWDD2A
ENSG00000013441	1524.03	1418.09	1735.38	1570.24	CLK1
ENSG00000013503	384.338	381.927	304.016	349.167	POLR3B
ENSG00000013523	180.753	175.739	158.514	192.854	ANGEL1
ENSG00000013561	4476.97	3439.09	6292.07	4453.91	RNF14
ENSG00000013563	639.295	535.916	697.936	641.493	DNASE1L1
ENSG00000013573	1284.3	1825.25	1218.43	2125.45	DDX11
ENSG00000013583	1625.83	1205.81	2792.93	1962.03	HEBP1
ENSG00000013588	200.731	208.799	854.085	629.313	GPRC5A
ENSG00000013619	232.125	334.078	218.844	399.918	MAMLD1
ENSG00000013810	4059.33	4330.83	2678.18	3015.63	TACC3
ENSG00000014123	2839.72	2418.58	3184.48	2344.7	UFL1
ENSG00000014138	541.308	509.816	264.979	391.798	POLA2
ENSG00000014164	683.056	725.575	696.753	765.325	ZC3H3
ENSG00000014216	4232.47	3743.58	4210.09	4291.51	CAPN1
ENSG00000014641	9488.58	6183.92	7663.1	4824.39	MDH1
ENSG00000014824	3572.25	2831.83	3157.27	2554.81	SLC30A9
ENSG00000014914	370.068	322.768	843.438	697.319	MTMR11
ENSG00000014919	2128.13	1900.94	2801.21	2179.25	COX15
ENSG00000015133	239.736	339.298	196.368	299.431	CCDC88C
ENSG00000015153	520.378	406.287	385.639	315.671	YAF2
ENSG00000015171	3708.29	3707.04	3018.87	2960.81	ZMYND11
ENSG00000015285	54.2259	49.5897	79.2572	91.3518	WAS
ENSG00000015475	1652.46	1412.87	1680.96	1562.12	BID
ENSG00000015479	329.161	296.668	294.553	293.341	MATR3
ENSG00000015532	1625.83	1826.99	2284.26	2529.43	XYLT2
ENSG00000015676	1927.4	1939.22	2288.99	2254.36	NUDCD3
ENSG00000016391	52.3232	76.5595	36.6712	48.721	CHDH
ENSG00000016864	1796.11	1552.94	1786.24	1465.69	GLT8D1
ENSG00000017260	3453.33	3516.52	3320.52	2966.9	ATP2C1
ENSG00000017797	3069.95	2768.32	2544.51	2464.47	RALBP1
ENSG00000018189	865.712	901.314	1343.82	1207.87	RUFY3
ENSG00000018236	44.7126	40.0197	27.2077	20.3004	CNTN1
ENSG00000018408	13974.1	12322.6	8072.4	7826.82	WWTR1
ENSG00000018510	4401.81	4728.42	3567.75	3535.32	AGPS
ENSG00000018610	720.158	595.946	667.18	533.901	CXorf56
ENSG00000018699	1076.91	942.203	1456.2	1058.67	TTC27
ENSG00000019144	4745.24	5449.64	3299.23	4419.4	PHLDB1
ENSG00000019485	259.714	307.978	339.505	429.354	PRDM11
ENSG00000019505	78.0092	66.1195	125.392	105.562	SYT13
ENSG00000019549	38.0533	23.4898	43.7689	78.1566	SNAI2
ENSG00000019582	726.817	662.065	561.898	527.811	CD74
ENSG00000019995	416.683	447.177	434.14	443.564	ZRANB1
ENSG00000020129	1693.37	1721.72	1265.75	1478.88	NCDN
ENSG00000020181	46.6152	46.9797	42.5859	65.9763	ADGRA2
ENSG00000020256	748.698	695.995	990.123	930.774	ZFP64
ENSG00000020426	390.046	291.448	296.919	244.62	MNAT1
ENSG00000020577	273.983	371.487	242.503	384.693	SAMD4A
ENSG00000020922	1202.48	1161.44	908.5	944.984	MRE11
ENSG00000021300	52.3232	38.2797	30.7565	31.4656	PLEKHB1
ENSG00000021355	722.061	515.906	904.951	732.845	SERPINB1
ENSG00000021574	696.375	744.715	567.812	593.787	SPAST
ENSG00000021645	69.4472	84.3894	34.3053	53.7961	NRXN3
ENSG00000021762	355.798	344.518	380.908	429.354	OSBPL5
ENSG00000021776	2580.96	2589.1	2034.66	2030.04	AQR
ENSG00000021826	49.4692	46.1097	41.403	32.4806	CPS1
ENSG00000022267	735.379	595.946	745.254	829.272	FHL1
ENSG00000022277	3407.67	2693.5	3197.49	2519.28	RTF2
ENSG00000022567	185.51	227.068	119.477	178.644	SLC45A4
ENSG00000022840	4533.09	4135.95	4346.13	4103.73	RNF10
ENSG00000022976	136.992	173.999	205.832	214.169	ZNF839
ENSG00000023041	2305.08	2122.79	2195.54	1977.26	ZDHHC6
ENSG00000023171	39.9559	18.2699	13.0124	5.0751	GRAMD1B
ENSG00000023191	3500.9	3260.74	4355.59	4099.67	RNH1
ENSG00000023228	9447.67	8234.49	7702.14	7137.62	NDUFS1
ENSG00000023287	3065.19	2836.18	3515.71	2686.76	RB1CC1
ENSG00000023318	2790.26	2637.82	2753.89	2228.98	ERP44
ENSG00000023330	4706.24	3862.77	3264.92	3274.46	ALAS1
ENSG00000023445	530.843	772.555	370.261	507.51	BIRC3
ENSG00000023516	1933.11	2438.59	2246.41	2371.09	AKAP11
ENSG00000023572	421.44	366.267	288.638	285.221	GLRX2
ENSG00000023608	408.121	324.508	462.531	331.912	SNAPC1
ENSG00000023697	1244.34	915.234	996.038	785.626	DERA
ENSG00000023734	7017.02	5851.58	5513.7	4624.43	STRAP
ENSG00000023839	7732.42	8920.05	11937.1	12108.2	ABCC2
ENSG00000023902	840.026	813.444	1303.6	1158.14	PLEKHO1
ENSG00000023909	4316.19	4433.49	3823.27	3847.94	GCLM
ENSG00000024048	1584.92	1649.51	1846.57	1684.93	UBR2
ENSG00000024422	63.7392	80.9094	227.125	278.116	EHD2
ENSG00000024526	2621.87	2510.8	1817	1356.07	DEPDC1
ENSG00000024862	617.414	406.287	818.596	452.699	CCDC28A
ENSG00000025039	3716.85	2943.19	5126.87	3434.83	RRAGD
ENSG00000025156	749.649	595.076	513.397	412.098	HSF2
ENSG00000025293	2161.43	2182.81	2229.85	1991.47	PHF20
ENSG00000025434	89.4252	69.5995	132.49	116.727	NR1H3
ENSG00000025708	221.66	207.929	315.846	375.558	TYMP
ENSG00000025770	1549.72	1467.68	1181.76	1354.04	NCAPH2
ENSG00000025772	1206.29	1158.83	1115.51	979.495	TOMM34
ENSG00000025796	3925.19	4078.53	4226.65	3818.51	SEC63
ENSG00000025800	2895.85	3135.46	2677	2821.76	KPNA6
ENSG00000026025	52298.5	44238.3	80708.6	63729.1	VIM
ENSG00000026036	44.7126	131.369	27.2077	112.667	RTEL1-TNFRSF6B
ENSG00000026103	234.979	232.288	438.872	560.291	FAS
ENSG00000026297	4270.53	3760.11	5460.46	5068	RNASET2
ENSG00000026508	4313.34	4344.75	9937.9	8511.96	CD44
ENSG00000026652	5917.28	6204.8	9548.71	9298.6	AGPAT4
ENSG00000026950	156.97	140.939	218.844	191.839	BTN3A1
ENSG00000027001	2162.38	1646.9	2259.42	1694.07	MIPEP
ENSG00000027075	56.1286	71.3395	81.623	62.9313	PRKCH
ENSG00000027697	861.906	738.625	780.742	651.643	IFNGR1
ENSG00000027847	481.374	513.296	406.932	478.075	B4GALT7
ENSG00000028116	823.853	731.665	809.133	745.025	VRK2
ENSG00000028203	1550.67	1418.96	1630.09	1485.99	VEZT
ENSG00000028310	1281.44	1630.37	1126.16	1624.03	BRD9
ENSG00000028528	3247.85	3413.86	3003.49	3583.02	SNX1
ENSG00000028839	390.046	310.588	268.528	208.079	TBPL1
ENSG00000029153	712.547	823.884	308.748	432.399	ARNTL2
ENSG00000029363	6939.01	6664.15	5991.6	5277.09	BCLAF1
ENSG00000029364	1914.08	1840.91	1878.51	1575.31	SLC39A9
ENSG00000029534	4.75666	8.69994	9.46354	23.3455	ANK1
ENSG00000029639	375.776	292.318	351.334	319.731	TFB1M
ENSG00000029725	2306.03	2549.95	1970.78	2126.47	RABEP1
ENSG00000029993	5231.37	4759.74	4620.57	3963.65	HMGB3
ENSG00000030066	2518.17	2551.69	2197.91	2236.09	NUP160
ENSG00000030110	1379.43	1155.35	1159.28	1089.12	BAK1
ENSG00000030419	30.4426	35.6698	15.3783	16.2403	IKZF2
ENSG00000030582	6328.26	5226.92	9200.93	7435.02	GRN
ENSG00000031003	1434.61	1366.76	1130.89	1030.25	FAM13B
ENSG00000031081	168.386	207.059	191.637	223.304	ARHGAP31
ENSG00000031691	640.246	492.417	416.396	321.761	CENPQ
ENSG00000031698	5432.1	4922.43	12794.7	9740.13	SARS
ENSG00000031823	2123.37	1972.28	1442.01	1702.19	RANBP3
ENSG00000032219	669.737	618.566	493.287	489.24	ARID4A
ENSG00000032389	1267.17	1023.11	1134.44	869.872	EIPR1
ENSG00000032444	2563.84	2570.83	2970.37	3386.11	PNPLA6
ENSG00000032742	549.87	492.417	651.801	455.744	IFT88
ENSG00000033011	528.94	494.157	462.531	428.339	ALG1
ENSG00000033030	1367.06	1324.13	1591.06	1518.47	ZCCHC8
ENSG00000033050	1817.04	1756.52	1174.66	1378.4	ABCF2
ENSG00000033100	826.707	1184.93	791.389	1460.61	CHPF2
ENSG00000033122	97.9871	120.059	49.6836	48.721	LRRC7
ENSG00000033170	156.018	173.999	152.6	129.923	FUT8
ENSG00000033178	2770.28	2725.69	2979.83	2672.55	UBA6
ENSG00000033327	516.573	568.976	854.085	881.038	GAB2
ENSG00000033627	455.688	628.136	383.273	626.268	ATP6V0A1
ENSG00000033800	1178.7	1103.15	1327.26	1008.93	PIAS1
ENSG00000033867	1543.06	2174.98	1599.34	2003.65	SLC4A7
ENSG00000034053	739.185	782.995	776.01	919.608	APBA2
ENSG00000034152	649.759	615.956	431.774	479.09	MAP2K3
ENSG00000034510	46712.3	32396	42880.5	36364.1	TMSB10
ENSG00000034533	95.1332	102.659	98.1842	94.3969	ASTE1
ENSG00000034677	3716.85	3225.94	6751.05	4274.25	RNF19A
ENSG00000034693	610.755	501.987	520.495	407.023	PEX3
ENSG00000034713	1270.98	774.295	1096.59	761.265	GABARAPL2
ENSG00000035115	885.69	1125.77	1249.19	1332.72	SH3YL1
ENSG00000035141	1860.8	1559.03	1911.64	1507.31	FAM136A
ENSG00000035403	5748.9	6777.25	4744.78	5771.41	VCL
ENSG00000035499	831.464	780.385	566.629	475.029	DEPDC1B
ENSG00000035664	39.9559	25.2298	43.7689	30.4506	DAPK2
ENSG00000035681	1361.36	1218.86	1623	1479.9	NSMAF
ENSG00000035687	3071.85	2737	4402.91	3320.13	ADSS
ENSG00000035862	9974.71	8755.62	13280.9	10025.4	TIMP2
ENSG00000035928	3061.38	2964.07	3462.47	2926.3	RFC1
ENSG00000036054	1425.09	1137.95	1217.25	962.239	TBC1D23
ENSG00000036257	3984.18	3673.11	2887.56	2689.8	CUL3
ENSG00000036448	138.894	100.919	133.673	123.832	MYOM2
ENSG00000036549	2139.54	2172.37	3152.54	2570.03	AC118549.1
ENSG00000037042	174.094	254.038	230.674	303.491	TUBG2
ENSG00000037241	1407.02	1021.37	1089.49	897.278	RPL26L1
ENSG00000037280	118.916	125.279	111.197	105.562	FLT4
ENSG00000037474	2899.66	3135.46	1918.73	2556.84	NSUN2
ENSG00000037637	428.099	453.267	424.676	461.834	FBXO42
ENSG00000037749	880.933	903.054	844.621	834.347	MFAP3
ENSG00000037757	766.773	764.725	804.401	851.602	MRI1
ENSG00000037897	185.51	227.938	167.978	198.944	METTL1
ENSG00000037965	24.7346	29.5798	36.6712	75.1115	HOXC8
ENSG00000038002	320.599	236.638	386.822	305.521	AGA
ENSG00000038210	618.365	473.277	427.042	412.098	PI4K2B
ENSG00000038219	3771.08	4488.3	4393.45	4165.64	BOD1L1
ENSG00000038274	2188.06	1776.53	1934.11	1523.55	MAT2B
ENSG00000038358	1681	1790.45	1624.18	1782.38	EDC4
ENSG00000038382	5663.28	8271.9	6367.78	7684.72	TRIO
ENSG00000038427	53089.1	80104.7	41969.6	52842	VCAN
ENSG00000038532	781.043	853.464	461.348	644.538	CLEC16A
ENSG00000038945	389.095	317.548	574.91	393.828	MSR1
ENSG00000039123	4018.42	3466.93	3854.03	2910.06	MTREX
ENSG00000039139	156.018	216.628	105.282	118.757	DNAH5
ENSG00000039319	1702.88	1976.63	1703.44	1665.65	ZFYVE16
ENSG00000039523	280.643	326.248	367.895	525.781	RIPOR1
ENSG00000039560	1614.41	1739.99	1242.09	1601.7	RAI14
ENSG00000039650	787.703	977.873	453.067	782.581	PNKP
ENSG00000040199	482.325	580.286	287.455	433.414	PHLPP2
ENSG00000040275	3486.63	3506.08	2357.6	2395.45	SPDL1
ENSG00000040341	2052.02	1703.45	1861.95	1437.27	STAU2
ENSG00000040487	159.824	177.479	195.186	207.064	PQLC2
ENSG00000040531	346.285	377.577	346.602	414.128	CTNS
ENSG00000040608	233.076	278.398	358.432	407.023	RTN4R
ENSG00000040633	1239.58	1178.84	985.391	1003.86	PHF23
ENSG00000040933	742.99	928.284	657.716	937.879	INPP4A
ENSG00000041353	53.2746	28.7098	34.3053	45.6759	RAB27B
ENSG00000041357	6581.31	4701.45	4646.6	3692.64	PSMA4
ENSG00000041802	1087.37	1186.67	703.851	929.759	LSG1
ENSG00000041880	1155.87	967.433	1579.23	1381.44	PARP3
ENSG00000041982	95.1332	107.879	185.722	258.83	TNC
ENSG00000041988	167.434	141.809	230.674	166.463	THAP3
ENSG00000042062	29.4913	23.4898	2.36589	8.12016	RIPOR3
ENSG00000042088	550.821	522.866	533.507	430.369	TDP1
ENSG00000042286	1348.99	1318.91	1715.27	1647.38	AIFM2
ENSG00000042317	139.846	102.659	218.844	130.938	SPATA7
ENSG00000042429	1458.39	1318.04	1000.77	989.645	MED17
ENSG00000042445	1238.63	1125.77	2351.69	1986.39	RETSAT
ENSG00000042493	199.78	167.909	335.956	386.723	CAPG
ENSG00000042753	3293.51	2371.6	2262.97	2008.73	AP2S1
ENSG00000043093	1230.07	1125.77	985.391	859.722	DCUN1D1
ENSG00000043143	2398.31	2504.71	2628.5	2701.98	JADE2
ENSG00000043355	435.71	509.816	389.188	480.105	ZIC2
ENSG00000043514	721.109	629.876	877.743	638.448	TRIT1
ENSG00000044090	2366.91	2404.66	3707.34	3501.82	CUL7
ENSG00000044115	21470.6	18361.2	19969.3	17627.9	CTNNA1
ENSG00000044446	1198.68	1304.12	1456.2	1437.27	PHKA2
ENSG00000044459	427.148	369.747	380.908	328.867	CNTLN
ENSG00000044574	15891	18520.4	30677.2	23924	HSPA5
ENSG00000046604	6181.75	6396.2	9239.96	7748.66	DSG2
ENSG00000046647	385.289	332.338	563.081	369.467	GEMIN8
ENSG00000046651	858.101	965.693	1185.31	1344.9	OFD1
ENSG00000046653	26.6373	53.9396	34.3053	73.0815	GPM6B
ENSG00000046889	615.511	970.043	923.878	1029.23	PREX2
ENSG00000047056	804.826	769.075	616.313	695.289	WDR37
ENSG00000047188	1534.5	1525.1	1316.62	1387.53	YTHDC2
ENSG00000047230	871.42	739.495	882.475	762.28	CTPS2
ENSG00000047249	2525.79	1846.13	2668.72	1997.56	ATP6V1H
ENSG00000047315	4424.64	3750.54	3059.09	2802.47	POLR2B
ENSG00000047346	326.307	310.588	272.077	321.761	FAM214A
ENSG00000047365	117.965	132.239	68.6107	93.3819	ARAP2
ENSG00000047410	10896.6	12392.2	11416.6	10565.3	TPR
ENSG00000047457	319.647	496.767	535.873	590.742	CP
ENSG00000047578	941.818	1117.94	1064.65	1209.9	KIAA0556
ENSG00000047579	499.449	425.427	470.811	403.978	DTNBP1
ENSG00000047621	942.77	818.664	809.133	658.748	C12orf4
ENSG00000047634	247.346	322.768	163.246	220.259	SCML1
ENSG00000047644	1133.04	1534.67	1734.19	2181.28	WWC3
ENSG00000047648	439.515	408.027	302.833	255.785	ARHGAP6
ENSG00000047849	20386.1	20495.3	21968.4	20533.9	MAP4
ENSG00000047932	1125.43	1167.53	1126.16	1037.35	GOPC
ENSG00000048028	511.816	495.897	561.898	553.186	USP28
ENSG00000048052	30.4426	26.0998	73.3424	50.751	HDAC9
ENSG00000048140	1876.03	1812.2	1328.44	1413.92	TSPAN17
ENSG00000048162	1287.15	1246.7	1427.81	1154.08	NOP16
ENSG00000048342	546.064	417.597	545.337	399.918	CC2D2A
ENSG00000048392	1288.1	1110.11	2014.55	1609.82	RRM2B
ENSG00000048405	681.153	762.115	605.667	631.343	ZNF800
ENSG00000048462	21.8806	65.2495	22.4759	54.8111	TNFRSF17
ENSG00000048471	4125.92	4015.02	4835.87	3792.12	SNX29
ENSG00000048544	2065.34	1581.65	1830.01	1471.78	MRPS10
ENSG00000048649	2202.33	2362.03	2830.78	2375.15	RSF1
ENSG00000048707	1061.69	1154.48	1259.83	1320.54	VPS13D
ENSG00000048740	730.623	873.474	1042.17	964.269	CELF2
ENSG00000048828	10681.6	11938.1	11374	12233	FAM120A
ENSG00000048991	2193.77	2273.29	1750.76	1775.27	R3HDM1
ENSG00000049130	445.223	437.607	202.283	224.319	KITLG
ENSG00000049167	323.453	286.228	217.661	208.079	ERCC8
ENSG00000049192	9.51332	13.0499	9.46354	13.1953	ADAMTS6
ENSG00000049239	611.706	669.025	1010.23	1119.57	H6PD
ENSG00000049245	1505.01	1233.65	1518.9	1265.73	VAMP3
ENSG00000049246	409.073	475.017	499.202	465.894	PER3
ENSG00000049323	129.381	118.319	195.186	186.764	LTBP1
ENSG00000049449	6970.41	6933.85	8805.82	7316.27	RCN1
ENSG00000049541	1476.47	1240.61	1180.58	1098.25	RFC2
ENSG00000049618	1700.98	2074.94	1770.87	1949.85	ARID1B
ENSG00000049656	2772.18	2886.64	1914	2288.87	CLPTM1L
ENSG00000049759	939.916	930.894	506.299	439.504	NEDD4L
ENSG00000049768	11.416	15.6599	7.09766	11.1652	FOXP3
ENSG00000049769	187.412	184.439	204.649	251.725	PPP1R3F
ENSG00000049860	3329.66	2567.35	3378.48	2674.58	HEXB
ENSG00000049883	544.162	571.586	778.376	646.568	PTCD2
ENSG00000050030	85.6198	82.6494	50.8665	62.9313	NEXMIF
ENSG00000050130	1168.24	970.043	961.732	752.13	JKAMP
ENSG00000050165	1274.78	1414.61	4237.3	4425.49	DKK 3.00
ENSG00000050327	109.403	136.589	167.978	189.809	ARHGEF5
ENSG00000050344	891.398	1092.71	714.497	802.881	NFE2L3
ENSG00000050393	1301.42	1231.91	1164.02	1164.23	MCUR1
ENSG00000050405	162.678	146.159	207.015	138.043	LIMA1
ENSG00000050426	1161.58	1151.87	2181.35	1687.98	LETMD1
ENSG00000050438	152.213	174.869	107.648	78.1566	SLC4A8
ENSG00000050748	2276.54	2090.6	1871.42	1952.9	MAPK9
ENSG00000050820	4472.21	4705.8	4544.87	5062.92	BCAR1
ENSG00000051009	494.692	640.316	475.543	735.89	FAM160A2
ENSG00000051108	2232.78	2000.12	3390.31	2769.99	HERPUD1
ENSG00000051128	2076.76	1739.12	2559.89	2335.56	HOMER3
ENSG00000051180	766.773	723.835	621.045	590.742	RAD51
ENSG00000051341	628.83	893.484	421.128	623.222	POLQ
ENSG00000051382	2834.97	2770.06	2362.34	2184.32	PIK3CB
ENSG00000051523	7262.46	5450.51	5167.09	5143.11	CYBA
ENSG00000051596	1043.61	890.874	1005.5	833.332	THOC3
ENSG00000051620	1992.09	1786.1	2280.71	1866.62	HEBP2
ENSG00000051825	1730.47	1965.32	1833.56	1825.01	MPHOSPH9
ENSG00000052126	929.451	807.354	668.363	666.868	PLEKHA5
ENSG00000052344	17.124	13.0499	104.099	48.721	PRSS8
ENSG00000052723	1857	1881.8	2194.36	2186.35	SIKE1
ENSG00000052749	1036.95	1272.8	1234.99	1419	RRP12
ENSG00000052795	1441.27	1428.53	2313.84	1675.8	FNIP2
ENSG00000052802	1337.57	1083.14	1194.77	863.782	MSMO1
ENSG00000052841	2052.02	2261.11	2978.65	2981.11	TTC17
ENSG00000052850	25.686	31.3198	15.3783	19.2854	ALX4
ENSG00000053254	477.568	561.146	752.351	728.785	FOXN3
ENSG00000053371	741.087	590.726	735.79	599.877	AKR7A2
ENSG00000053372	994.141	911.754	903.768	813.031	MRTO4
ENSG00000053438	28.5399	52.1996	30.7565	46.6909	NNAT
ENSG00000053501	246.395	206.189	274.443	215.184	USE1
ENSG00000053524	9.51332	13.9199	22.4759	20.3004	MCF2L2
ENSG00000053702	47.5666	80.0394	62.696	92.3668	NRIP2
ENSG00000053747	131.284	175.739	186.905	193.869	LAMA3
ENSG00000053770	1219.61	1224.08	939.256	913.518	AP5M1
ENSG00000053900	847.636	921.324	787.84	801.866	ANAPC4
ENSG00000053918	19.978	19.1399	18.9271	23.3455	KCNQ1
ENSG00000054116	1610.6	1317.17	1132.08	1057.65	TRAPPC3
ENSG00000054118	6371.07	6126.5	5194.3	4985.78	THRAP3
ENSG00000054148	4868.91	3993.27	5445.08	5087.28	PHPT1
ENSG00000054179	105.598	118.319	204.649	225.335	ENTPD2
ENSG00000054267	2025.38	2131.49	1914	1800.65	ARID4B
ENSG00000054277	175.045	158.339	274.443	169.508	OPN3
ENSG00000054282	723.012	552.446	841.072	592.772	SDCCAG8
ENSG00000054356	13.3186	6.08996	36.6712	15.2253	PTPRN
ENSG00000054392	142.7	178.349	306.382	239.545	HHAT
ENSG00000054523	1887.44	2116.7	1938.84	1886.92	KIF1B
ENSG00000054598	372.922	493.287	321.76	325.822	FOXC1
ENSG00000054611	1353.74	1271.93	1595.79	1349.98	TBC1D22A
ENSG00000054654	3520.88	4074.18	3346.54	3136.41	SYNE2
ENSG00000054690	195.023	340.168	201.1	410.068	PLEKHH1
ENSG00000054793	566.994	659.455	929.793	983.555	ATP9A
ENSG00000054965	1700.98	1753.04	1847.76	1610.84	FAM168A
ENSG00000054967	312.037	408.897	264.979	309.581	RELT
ENSG00000055044	4471.26	4092.45	4276.34	3698.73	NOP58
ENSG00000055070	2404.01	2190.64	1995.62	1806.74	SZRD1
ENSG00000055130	3082.31	2849.23	2647.43	2379.21	CUL1
ENSG00000055147	713.499	569.846	558.349	465.894	FAM114A2
ENSG00000055163	2595.23	2575.18	5010.94	4148.39	CYFIP2
ENSG00000055208	2951.98	3060.64	3576.04	3259.23	TAB2
ENSG00000055211	2358.35	1896.59	2048.86	1467.72	GINM1
ENSG00000055332	2729.37	3002.35	2615.49	2771.01	EIF2AK2
ENSG00000055483	2492.49	3265.96	3440	4048.92	USP36
ENSG00000055609	1487.88	2021	1516.53	1844.29	KMT2C
ENSG00000055732	106.549	177.479	86.3548	176.614	MCOLN3
ENSG00000055813	63.7392	54.8096	56.7812	53.7961	CCDC85A
ENSG00000055917	3304.93	3780.99	3422.25	3334.34	PUM2
ENSG00000055950	2140.5	1477.25	2035.84	1521.52	MRPL43
ENSG00000056050	367.214	281.008	208.198	186.764	HPF1
ENSG00000056097	4668.18	4541.37	5473.48	4655.9	ZFR
ENSG00000056277	562.237	678.595	632.874	614.087	ZNF280C
ENSG00000056558	12.3673	28.7098	43.7689	78.1566	TRAF1
ENSG00000056586	3008.11	3686.16	3224.7	3449.04	RC3H2
ENSG00000056736	160.775	140.069	165.612	129.923	IL17RB
ENSG00000056972	58.9826	61.7696	119.477	72.0664	TRAF3IP2
ENSG00000056998	307.28	236.638	139.587	189.809	GYG2
ENSG00000057019	22639.8	24224.1	16587.2	20139	DCBLD2
ENSG00000057252	2457.29	2592.58	2706.57	2630.93	SOAT1
ENSG00000057294	443.32	471.537	311.114	321.761	PKP2
ENSG00000057468	13.3186	29.5798	42.5859	44.6609	MSH4
ENSG00000057608	13482.3	9912.71	15048.2	10229.4	GDI2
ENSG00000057663	1228.17	936.983	928.61	759.235	ATG5
ENSG00000057704	523.232	391.497	438.872	406.008	TMCC3
ENSG00000057757	530.843	520.256	486.189	462.849	PITHD1
ENSG00000057935	1111.16	978.743	1723.55	1361.14	MTA3
ENSG00000058056	723.963	773.425	380.908	447.624	USP13
ENSG00000058063	1628.68	1985.33	1824.1	1793.54	ATP11B
ENSG00000058091	456.639	497.637	350.151	352.212	CDK14
ENSG00000058262	5956.29	6410.99	5100.85	5474	SEC61A1
ENSG00000058272	3048.07	3238.12	2843.79	2624.84	PPP1R12A
ENSG00000058404	89.4252	131.369	133.673	152.253	CAMK2B
ENSG00000058453	456.639	626.396	488.555	693.259	CROCC
ENSG00000058600	1017.92	1171.88	1237.36	1566.18	POLR3E
ENSG00000058668	814.34	692.515	1294.14	849.572	ATP2B4
ENSG00000058673	4126.88	4815.42	4925.77	5195.89	ZC3H11A
ENSG00000058729	783.897	670.765	764.181	637.433	RIOK2
ENSG00000058799	321.55	243.598	186.905	169.508	YIPF1
ENSG00000058804	2771.23	2998.87	2239.31	2053.39	NDC1
ENSG00000058866	50.4206	54.8096	97.0013	123.832	DGKG
ENSG00000059122	1083.57	1255.4	1686.88	2200.56	FLYWCH1
ENSG00000059145	682.105	1014.41	820.962	1196.71	UNKL
ENSG00000059377	207.39	242.728	170.344	221.274	TBXAS1
ENSG00000059378	59.9339	74.8195	62.696	72.0664	PARP12
ENSG00000059573	4459.84	4196.85	5022.77	4239.74	ALDH18A1
ENSG00000059588	314.891	428.037	264.979	411.083	TARBP1
ENSG00000059691	812.437	582.896	846.987	561.306	GATB
ENSG00000059728	105.598	105.269	144.319	123.832	MXD1
ENSG00000059758	643.1	717.745	679.009	707.469	CDK17
ENSG00000059769	933.256	1110.11	920.329	891.188	DNAJC25
ENSG00000059804	51.3719	69.5995	194.003	154.283	SLC2A3
ENSG00000059915	71.3499	56.5496	67.4277	98.457	PSD
ENSG00000060069	516.573	539.396	319.394	414.128	CTDP1
ENSG00000060138	5805.98	4797.15	8533.75	6455.53	YBX3
ENSG00000060140	21.8806	23.4898	11.8294	19.2854	STYK1
ENSG00000060237	4405.62	6030.8	4620.57	5704.41	WNK1
ENSG00000060339	4920.29	5012.91	4237.3	4453.91	CCAR1
ENSG00000060491	1746.64	1867.88	2336.31	2559.88	OGFR
ENSG00000060642	193.12	159.209	248.418	227.365	PIGV
ENSG00000060656	76.1065	97.4393	113.562	144.133	PTPRU
ENSG00000060688	815.291	641.186	384.456	454.729	SNRNP40
ENSG00000060749	2246.09	2771.8	2014.55	2112.26	QSER1
ENSG00000060762	1155.87	708.175	883.658	654.688	MPC1
ENSG00000060971	2570.5	1773.92	2013.37	1744.82	ACAA1
ENSG00000060982	30.4426	63.5096	102.916	90.3368	BCAT1
ENSG00000061273	1116.86	1695.62	1035.07	1578.36	HDAC7
ENSG00000061337	15.2213	15.6599	2.36589	16.2403	LZTS1
ENSG00000061455	71.3499	77.4295	53.2324	62.9313	PRDM6
ENSG00000061656	216.904	215.758	236.589	271.01	SPAG4
ENSG00000061676	17980.2	15488.5	19221.6	15220.2	NCKAP1
ENSG00000061794	5018.27	3817.53	5053.53	3517.05	MRPS35
ENSG00000061918	208.342	155.729	123.026	75.1115	GUCY1B1
ENSG00000061936	1406.07	1610.36	1701.07	1952.9	SFSWAP
ENSG00000061938	310.134	422.817	250.784	438.489	TNK2
ENSG00000061987	1271.93	1617.32	1287.04	1500.2	MON2
ENSG00000062194	2250.85	2133.23	2530.31	2012.79	GPBP1
ENSG00000062282	49.4692	45.2397	65.0618	34.5107	DGAT2
ENSG00000062370	220.709	225.328	172.71	179.659	ZNF112
ENSG00000062485	15793.1	14345.3	15669.3	13193.2	CS
ENSG00000062582	881.884	565.496	899.036	724.724	MRPS24
ENSG00000062598	766.773	778.645	447.152	565.366	ELMO2
ENSG00000062650	2988.13	3231.16	2944.34	2875.55	WAPL
ENSG00000062716	9502.85	9712.61	8004.97	9553.37	VMP1
ENSG00000062725	2300.32	1970.54	2636.78	2086.88	APPBP2
ENSG00000062822	1646.75	1677.35	1133.26	1499.18	POLD1
ENSG00000063046	21411.6	17408.6	31898	22616.7	EIF4B
ENSG00000063169	294.913	406.287	182.173	370.482	BICRA
ENSG00000063176	489.936	599.426	508.665	668.898	SPHK2
ENSG00000063177	16620.7	11791	18394.8	14666	RPL18
ENSG00000063180	65.6419	29.5798	44.9518	32.4806	CA11
ENSG00000063241	1055.98	789.085	859.999	724.724	ISOC2
ENSG00000063244	6411.02	6347.48	5036.97	5517.65	U2AF2
ENSG00000063245	3717.8	3777.51	3754.66	4203.2	EPN1
ENSG00000063322	1204.39	1057.04	1179.39	1150.02	MED29
ENSG00000063438	24.7346	62.6396	59.1471	70.0364	AHRR
ENSG00000063587	847.636	1101.41	1135.62	1304.3	ZNF275
ENSG00000063601	1909.32	2128.88	1987.34	2025.98	MTMR1
ENSG00000063660	4768.07	6288.32	7821.62	9898.48	GPC1
ENSG00000063761	58.0312	60.8996	39.0371	55.8261	ADCK1
ENSG00000063854	876.176	733.405	675.46	677.019	HAGH
ENSG00000063978	3609.35	3273.79	3335.9	3013.6	RNF4
ENSG00000064012	2500.1	2171.5	2630.86	2060.49	CASP8
ENSG00000064042	4642.5	5620.16	4779.09	4613.27	LIMCH1
ENSG00000064102	1359.45	1174.49	1627.73	1220.05	INTS13
ENSG00000064115	2121.47	1885.28	1757.85	1646.36	TM7SF3
ENSG00000064199	122.722	81.7794	57.9642	66.9913	SPA17
ENSG00000064205	7.61065	8.69994	17.7441	9.13518	WISP2
ENSG00000064225	51.3719	87.8694	43.7689	64.9613	ST3GAL6
ENSG00000064270	6.65932	8.69994	16.5612	16.2403	ATP2C2
ENSG00000064300	94.1818	106.139	896.67	505.48	NGFR
ENSG00000064309	840.977	968.303	1725.91	1446.4	CDON
ENSG00000064313	1315.69	1329.35	1116.7	1235.28	TAF2
ENSG00000064393	2603.79	3966.3	2493.64	3552.57	HIPK2
ENSG00000064419	3844.33	3776.64	4135.57	3628.7	TNPO3
ENSG00000064489	13.3186	18.2699	10.6465	14.2103	BORCS8-MEF2B
ENSG00000064490	897.106	680.335	897.853	690.214	RFXANK
ENSG00000064545	646.905	611.606	564.264	573.486	TMEM161A
ENSG00000064547	81.8145	109.619	99.3672	193.869	LPAR2
ENSG00000064601	3390.55	3010.18	3236.53	2945.59	CTSA
ENSG00000064607	3936.61	5060.75	3184.48	4736.08	SUGP2
ENSG00000064651	690.667	1049.21	564.264	700.364	SLC12A2
ENSG00000064652	656.419	525.476	628.143	514.615	SNX24
ENSG00000064655	28.5399	20.8799	31.9394	27.4055	EYA2
ENSG00000064666	543.21	662.935	281.54	396.873	CNN2
ENSG00000064687	46.6152	73.0795	17.7441	50.751	ABCA7
ENSG00000064703	675.445	737.755	445.969	534.916	DDX20
ENSG00000064726	3890.95	3319.03	4029.1	3224.72	BTBD1
ENSG00000064763	446.174	488.937	519.312	493.3	FAR2
ENSG00000064932	3406.72	4323	3835.1	5027.4	SBNO2
ENSG00000064933	1426.05	1258.01	1360.38	1239.34	PMS1
ENSG00000064961	2797.87	2316.79	2620.22	2287.86	HMG20B
ENSG00000064989	70.3985	39.1497	42.5859	24.3605	CALCRL
ENSG00000064995	629.781	524.606	609.215	570.441	TAF11
ENSG00000064999	807.68	854.334	699.119	792.731	ANKS1A
ENSG00000065000	6665.98	7312.3	7102.39	7781.15	AP3D1
ENSG00000065029	841.928	816.054	630.508	760.25	ZNF76
ENSG00000065054	91.3278	80.9094	91.0866	104.547	SLC9A3R2
ENSG00000065057	347.236	274.048	320.577	259.845	NTHL1
ENSG00000065060	1591.58	1971.41	2236.94	2520.3	UHRF1BP1
ENSG00000065135	6812.49	5975.99	6514.46	5052.77	GNAI3
ENSG00000065150	12106.6	10964.5	11479.3	9925.88	IPO5
ENSG00000065154	3701.63	2678.71	2421.48	1917.37	OAT
ENSG00000065183	2108.15	2050.58	2283.08	1841.25	WDR3
ENSG00000065243	2526.74	2977.99	2445.14	2400.52	PKN2
ENSG00000065268	1150.16	954.383	1188.86	1144.94	WDR18
ENSG00000065308	727.769	872.604	790.206	797.806	TRAM2
ENSG00000065320	428.099	535.916	498.019	745.025	NTN1
ENSG00000065328	1005.56	999.623	288.638	445.594	MCM10
ENSG00000065413	25.686	35.6698	5.91471	19.2854	ANKRD44
ENSG00000065427	4623.47	3663.54	4701.01	3720.05	KARS
ENSG00000065457	394.803	508.076	267.345	400.933	ADAT1
ENSG00000065485	517.524	482.847	615.13	530.856	PDIA5
ENSG00000065491	358.652	347.998	358.432	332.927	TBC1D22B
ENSG00000065518	3403.86	2389	3070.92	2142.71	NDUFB4
ENSG00000065526	1075.96	1780.01	957.001	1556.03	SPEN
ENSG00000065534	2377.38	2649.13	2532.68	2806.53	MYLK
ENSG00000065548	5467.3	4566.6	5071.27	3990.04	ZC3H15
ENSG00000065559	1021.73	1002.23	789.023	770.4	MAP2K4
ENSG00000065600	361.506	367.137	365.529	409.053	TMEM206
ENSG00000065613	3701.63	3784.47	4495.18	3579.98	SLK
ENSG00000065615	1613.46	1253.66	1308.33	979.495	CYB5R4
ENSG00000065621	11.416	19.1399	14.1953	22.3304	GSTO2
ENSG00000065665	344.382	443.697	296.919	385.708	SEC61A2
ENSG00000065675	19.978	8.69994	15.3783	17.2553	PRKCQ
ENSG00000065802	2039.65	2542.12	2854.44	3707.87	ASB1
ENSG00000065809	1254.81	1458.98	1362.75	1547.91	FAM107B
ENSG00000065833	936.11	890.004	954.635	890.173	ME1
ENSG00000065882	1273.83	1336.31	1457.39	1417.98	TBC1D1
ENSG00000065883	1835.12	2368.99	1821.73	2150.83	CDK13
ENSG00000065911	3606.5	4085.49	8062.94	6864.58	MTHFD2
ENSG00000065923	131.284	193.139	165.612	177.629	SLC9A7
ENSG00000065970	452.834	627.266	545.337	707.469	FOXJ2
ENSG00000065978	35009	26685.3	27743.6	23364.8	YBX1
ENSG00000065989	7.61065	6.95995	31.9394	25.3755	PDE4A
ENSG00000066027	2462.05	2247.19	3023.6	2326.43	PPP2R5A
ENSG00000066032	46.6152	27.8398	49.6836	24.3605	CTNNA2
ENSG00000066044	3434.31	3160.69	2830.78	2631.95	ELAVL1
ENSG00000066084	1559.23	1542.5	1941.21	1565.16	DIP2B
ENSG00000066117	2287.95	2434.24	1883.24	2034.1	SMARCD1
ENSG00000066135	2031.09	1930.52	1729.46	1737.71	KDM4A
ENSG00000066136	1953.08	1650.38	2195.54	1881.85	NFYC
ENSG00000066230	286.351	519.386	557.166	941.939	SLC9A3
ENSG00000066248	498.498	410.637	1263.38	1028.22	NGEF
ENSG00000066279	4731.92	6279.62	3695.51	3460.2	ASPM
ENSG00000066322	2342.18	2053.19	2549.24	2314.25	ELOVL1
ENSG00000066336	6.65932	7.82995	13.0124	27.4055	SPI1
ENSG00000066379	192.169	123.539	260.247	174.583	ZNRD1
ENSG00000066382	12.3673	18.2699	10.6465	10.1502	MPPED2
ENSG00000066422	831.464	831.714	655.35	742.995	ZBTB11
ENSG00000066427	329.161	387.147	422.311	494.315	ATXN3
ENSG00000066455	871.42	754.285	973.562	812.016	GOLGA5
ENSG00000066468	6654.56	6938.2	4899.75	3526.18	FGFR2
ENSG00000066557	1842.73	1540.76	1425.45	1125.66	LRRC40
ENSG00000066583	1012.22	956.993	584.374	610.027	ISOC1
ENSG00000066629	483.276	439.347	280.357	260.86	EML1
ENSG00000066651	407.17	354.958	500.385	345.107	TRMT11
ENSG00000066654	2028.24	2097.56	1885.61	1676.81	THUMPD1
ENSG00000066697	3778.69	3467.8	5077.19	4276.28	MSANTD3
ENSG00000066735	1346.13	1593.83	1353.29	1736.7	KIF26A
ENSG00000066739	510.865	542.006	364.346	379.618	ATG2B
ENSG00000066777	2406.87	2493.4	3172.65	2963.86	ARFGEF1
ENSG00000066827	299.669	305.368	270.894	241.575	ZFAT
ENSG00000066855	1137.79	906.534	871.829	816.076	MTFR1
ENSG00000066923	141.748	181.829	91.0866	161.388	STAG3
ENSG00000066926	638.343	632.486	498.019	507.51	FECH
ENSG00000066933	1431.75	1828.73	1748.39	1909.25	MYO9A
ENSG00000067048	3919.49	3621.78	4579.17	3500.8	DDX3Y
ENSG00000067057	27881.6	25696.1	36659.4	33281.5	PFKP
ENSG00000067064	1682.91	1231.91	726.327	659.763	IDI1
ENSG00000067066	1189.16	1037.9	1617.08	1193.66	SP100
ENSG00000067082	12283.6	10083.2	10961.1	9866	KLF6
ENSG00000067113	304.426	217.498	170.344	180.674	PLPP1
ENSG00000067141	1700.03	2029.7	1607.62	1898.09	NEO1
ENSG00000067167	11161	8343.24	7732.9	5715.58	TRAM1
ENSG00000067177	287.302	319.288	534.69	577.547	PHKA1
ENSG00000067182	2108.15	2118.44	2343.41	2394.43	TNFRSF1A
ENSG00000067191	87.5225	174.869	199.917	330.897	CACNB1
ENSG00000067208	420.489	495.897	361.98	414.128	EVI5
ENSG00000067221	204.536	185.309	229.491	197.929	STOML1
ENSG00000067225	168187	135234	140641	125376	PKM
ENSG00000067248	1470.76	1284.11	789.023	767.355	DHX29
ENSG00000067334	3487.58	2924.05	3261.37	2498.98	DNTTIP2
ENSG00000067365	475.666	468.927	480.275	563.336	METTL22
ENSG00000067369	3910.92	3667.89	3846.93	3494.71	TP53BP1
ENSG00000067445	385.289	331.468	409.298	431.384	TRO
ENSG00000067533	986.531	1027.46	862.365	837.392	RRP15
ENSG00000067560	28502.8	22676.4	24232.6	20969.3	RHOA
ENSG00000067596	1454.59	1432.88	897.853	1024.16	DHX8
ENSG00000067601	113.208	100.919	81.623	68.0064	PMS2P4
ENSG00000067606	325.355	304.498	417.579	304.506	PRKCZ
ENSG00000067646	410.975	454.137	313.48	336.987	ZFY
ENSG00000067704	9012.91	8570.31	8468.69	7404.57	IARS2
ENSG00000067715	87.5225	104.399	298.102	260.86	SYT1
ENSG00000067798	64.6905	70.4695	55.5983	73.0815	NAV3
ENSG00000067829	3422.89	3004.09	3154.91	3048.11	IDH3G
ENSG00000067836	547.967	463.707	353.7	382.663	ROGDI
ENSG00000067840	645.954	767.335	738.156	893.218	PDZD4
ENSG00000067900	1642	1860.92	1759.04	1699.14	ROCK1
ENSG00000067955	1581.11	1578.17	1164.02	1272.84	CBFB
ENSG00000067992	144.602	135.719	131.307	104.547	PDK3
ENSG00000068001	886.641	809.094	555.983	617.132	HYAL2
ENSG00000068024	574.604	869.124	641.155	1002.84	HDAC4
ENSG00000068028	487.082	482.847	560.715	501.42	RASSF1
ENSG00000068078	3295.41	3051.07	1968.42	1795.57	FGFR3
ENSG00000068079	302.523	189.659	259.064	227.365	IFI35
ENSG00000068097	1073.1	1084.88	1515.35	1384.49	HEATR6
ENSG00000068120	2168.08	2059.28	2357.6	2425.9	COASY
ENSG00000068137	692.569	631.616	783.108	872.917	PLEKHH3
ENSG00000068305	1202.48	1156.22	1509.43	1382.46	MEF2A
ENSG00000068308	1517.37	1298.03	1393.51	1379.41	OTUD5
ENSG00000068323	1743.79	1931.39	2173.07	2499.99	TFE3
ENSG00000068354	407.17	398.457	537.056	505.48	TBC1D25
ENSG00000068366	3130.83	2696.98	3261.37	2508.12	ACSL4
ENSG00000068383	226.417	210.539	166.795	198.944	INPP5A
ENSG00000068394	723.012	626.396	703.851	620.177	GPKOW
ENSG00000068400	1253.85	1470.29	1300.05	1620.99	GRIPAP1
ENSG00000068438	554.626	546.356	494.47	550.141	FTSJ1
ENSG00000068489	3675.95	3515.65	4711.66	3622.61	PRR11
ENSG00000068615	74.2039	58.2896	30.7565	43.6459	REEP1
ENSG00000068650	3025.23	4013.28	2402.56	3041	ATP11A
ENSG00000068654	2861.61	3383.41	2220.38	2828.86	POLR1A
ENSG00000068697	8767.47	6174.35	7536.53	5360.32	LAPTM4A
ENSG00000068724	712.547	835.194	789.023	1037.35	TTC7A
ENSG00000068745	2990.03	2434.24	2564.62	2347.74	IP6K2
ENSG00000068784	491.838	436.737	476.726	410.068	SRBD1
ENSG00000068796	1437.46	1437.23	1251.55	1153.06	KIF2A
ENSG00000068878	1855.1	1973.15	1431.36	1571.25	PSME4
ENSG00000068885	482.325	477.627	410.481	354.242	IFT80
ENSG00000068903	355.798	339.298	451.884	451.684	SIRT2
ENSG00000068912	1396.55	1181.45	1075.29	1037.35	ERLEC1
ENSG00000068971	135.089	135.719	67.4277	119.772	PPP2R5B
ENSG00000069011	382.435	367.137	225.942	378.603	PITX1
ENSG00000069020	13.3186	9.56993	10.6465	9.13518	MAST4
ENSG00000069188	40.9073	46.1097	46.1348	68.0064	SDK2
ENSG00000069248	2208.04	2000.99	2015.73	1789.48	NUP133
ENSG00000069275	13863.8	13837.3	13974.1	11787.4	NUCKS1
ENSG00000069329	7583.06	5985.56	8215.54	6044.45	VPS35
ENSG00000069345	3012.87	2436.85	2950.26	2219.85	DNAJA2
ENSG00000069399	335.82	321.898	243.686	263.905	BCL3
ENSG00000069424	203.585	185.309	172.71	204.019	KCNAB2
ENSG00000069482	215.001	167.909	246.052	282.176	GAL
ENSG00000069493	21.8806	33.0598	43.7689	61.9162	CLEC2D
ENSG00000069509	703.985	437.607	600.935	371.497	FUNDC1
ENSG00000069667	348.187	488.067	833.975	760.25	RORA
ENSG00000069696	39.9559	66.1195	69.7936	165.448	DRD4
ENSG00000069702	81.8145	109.619	70.9766	121.802	TGFBR3
ENSG00000069849	2130.98	1685.18	1153.37	1258.63	ATP1B3
ENSG00000069869	763.919	805.614	1063.47	932.804	NEDD4
ENSG00000069943	503.254	421.947	597.386	478.075	PIGB
ENSG00000069956	2761.72	2786.59	3008.22	2638.04	MAPK6
ENSG00000069966	525.135	487.197	573.727	566.381	GNB5
ENSG00000069974	732.525	624.656	492.104	472.999	RAB27A
ENSG00000069998	1323.3	1227.56	1330.81	1207.87	HDHD5
ENSG00000070010	1935.01	1700.84	1205.42	1308.36	UFD1
ENSG00000070018	1860.8	2380.3	1586.33	1790.5	LRP6
ENSG00000070031	1.90266	13.0499	10.6465	31.4656	SCT
ENSG00000070047	1803.72	2230.66	1327.26	2016.85	PHRF1
ENSG00000070061	4202.03	4266.45	3913.17	3802.27	ELP1
ENSG00000070081	682.105	582.896	682.558	492.285	NUCB2
ENSG00000070087	3970.86	3287.71	4669.07	3532.27	PFN2
ENSG00000070159	7687.71	6885.13	8501.81	7793.33	PTPN3
ENSG00000070214	3596.03	3627.87	3275.57	3277.5	SLC44A1
ENSG00000070269	437.613	465.447	547.702	463.864	TMEM260
ENSG00000070366	817.194	893.484	1055.18	951.074	SMG6
ENSG00000070367	1968.3	1902.68	1479.86	1549.94	EXOC5
ENSG00000070371	120.819	168.779	152.6	220.259	CLTCL1
ENSG00000070388	10.4646	20.0099	13.0124	11.1652	FGF22
ENSG00000070404	347.236	305.368	512.214	531.871	FSTL3
ENSG00000070413	2756.01	3158.95	2673.45	2930.36	DGCR2
ENSG00000070423	1302.37	1235.39	1244.46	1492.08	RNF126
ENSG00000070444	852.393	1058.78	843.438	1253.55	MNT
ENSG00000070476	703.985	898.704	936.891	1110.43	ZXDC
ENSG00000070495	1574.45	1495.52	1238.54	1356.07	JMJD6
ENSG00000070501	529.892	332.338	512.214	350.182	POLB
ENSG00000070540	934.208	722.965	1033.89	866.827	WIPI1
ENSG00000070610	1958.79	2230.66	1835.93	2129.51	GBA2
ENSG00000070614	4966.9	6518.86	3728.64	4819.32	NDST1
ENSG00000070669	3694.97	4115.07	8654.41	7644.12	ASNS
ENSG00000070718	650.711	622.046	835.157	839.422	AP3M2
ENSG00000070731	30.4426	35.6698	43.7689	31.4656	ST6GALNAC2
ENSG00000070756	36870.8	35667.1	49257.7	44343.2	PABPC1
ENSG00000070759	22.832	13.0499	22.4759	18.2704	TESK2
ENSG00000070761	913.278	712.525	663.631	559.276	CFAP20
ENSG00000070770	1802.77	1937.48	2428.58	1979.29	CSNK2A2
ENSG00000070778	173.142	227.938	134.855	226.35	PTPN21
ENSG00000070785	628.83	487.197	669.545	545.066	EIF2B3
ENSG00000070814	3996.54	5052.92	3379.67	4540.19	TCOF1
ENSG00000070831	4359.95	3103.27	3445.91	2765.93	CDC42
ENSG00000070882	549.87	689.905	554.8	871.902	OSBPL3
ENSG00000070915	126.527	151.379	70.9766	57.8562	SLC12A3
ENSG00000070950	1868.42	1770.44	1704.62	1419	RAD18
ENSG00000070961	1170.14	1475.51	943.988	1064.76	ATP2B1
ENSG00000071051	1605.85	1605.14	1426.63	1463.66	NCK2
ENSG00000071054	5347.43	5946.41	5395.4	5816.07	MAP4K4
ENSG00000071073	214.05	238.378	166.795	230.41	MGAT4A
ENSG00000071082	21834	13309.2	25666.3	15414.1	RPL31
ENSG00000071127	15278.4	14066.1	11718.2	12219.8	WDR1
ENSG00000071189	1292.86	1290.2	1090.67	1000.81	SNX13
ENSG00000071205	314.891	279.268	414.03	332.927	ARHGAP10
ENSG00000071242	94.1818	69.5995	98.1842	98.457	RPS6KA2
ENSG00000071243	573.653	445.437	374.993	330.897	ING3
ENSG00000071246	237.833	291.448	228.308	286.236	VASH1
ENSG00000071462	3157.47	2619.55	2503.11	2515.22	BUD23
ENSG00000071537	2072	2515.15	3551.19	3098.86	SEL1L
ENSG00000071539	2328.86	2253.28	1606.44	1776.29	TRIP13
ENSG00000071553	4390.39	4182.06	5200.22	5140.06	ATP6AP1
ENSG00000071564	4940.26	5668.01	6275.51	6258.62	TCF3
ENSG00000071575	73.2525	93.0894	65.0618	53.7961	TRIB2
ENSG00000071626	5799.32	5700.2	4863.08	5143.11	DAZAP1
ENSG00000071655	2462.05	2898.82	1865.5	2570.03	MBD3
ENSG00000071794	2334.57	2203.69	2481.81	2041.21	HLTF
ENSG00000071859	3770.13	3438.22	4832.32	4578.76	FAM50A
ENSG00000071889	1316.64	1259.75	1449.1	1427.12	FAM3A
ENSG00000071894	1728.57	1921.82	1754.3	2189.4	CPSF1
ENSG00000071994	2822.6	2137.58	2390.73	1827.04	PDCD2
ENSG00000072041	98.9385	101.789	525.227	360.332	SLC6A15
ENSG00000072042	546.064	555.056	350.151	360.332	RDH11
ENSG00000072062	2074.85	1971.41	1152.19	1393.62	PRKACA
ENSG00000072071	394.803	557.666	253.15	482.135	ADGRL1
ENSG00000072110	4126.88	4503.09	3973.5	4419.4	ACTN1
ENSG00000072121	382.435	427.167	431.774	457.774	ZFYVE26
ENSG00000072133	516.573	517.646	547.702	455.744	RPS6KA6
ENSG00000072134	695.423	726.445	919.146	850.587	EPN2
ENSG00000072135	1934.06	1877.45	2354.06	2366.01	PTPN18
ENSG00000072163	65.6419	93.0894	128.941	200.974	LIMS2
ENSG00000072195	686.861	888.264	1049.27	1557.04	SPEG
ENSG00000072201	97.9871	80.0394	120.66	72.0664	LNX1
ENSG00000072210	1666.73	1461.59	1093.04	1150.02	ALDH3A2
ENSG00000072274	6929.5	9494.24	31481.7	26415.9	TFRC
ENSG00000072310	1374.67	1314.56	1689.24	1600.69	SREBF1
ENSG00000072364	6377.73	7147.87	7460.82	7166.04	AFF4
ENSG00000072401	828.61	633.356	454.25	428.339	UBE2D1
ENSG00000072415	699.229	761.245	589.105	566.381	MPP5
ENSG00000072422	121.77	108.749	89.9036	122.817	RHOBTB1
ENSG00000072501	4588.27	5664.53	2850.89	3769.79	SMC1A
ENSG00000072506	2149.06	1545.98	1557.94	1532.68	HSD17B10
ENSG00000072518	1412.73	1564.25	1253.92	1388.55	MARK2
ENSG00000072571	3336.32	2754.4	2938.43	1680.87	HMMR
ENSG00000072609	605.047	588.116	392.737	623.222	CHFR
ENSG00000072682	933.256	1218.86	1219.61	1391.59	P4HA2
ENSG00000072736	361.506	377.577	319.394	322.776	NFATC3
ENSG00000072756	1122.57	1097.06	798.486	779.536	TRNT1
ENSG00000072778	5408.32	5376.56	7113.03	6969.13	ACADVL
ENSG00000072786	809.583	899.574	850.536	1183.51	STK10
ENSG00000072803	2889.19	2956.24	2548.06	2417.78	FBXW11
ENSG00000072818	89.4252	113.969	137.221	168.493	ACAP1
ENSG00000072832	1593.48	1928.78	1961.32	2468.53	CRMP1
ENSG00000072840	3692.12	3906.27	4932.87	5082.21	EVC
ENSG00000072849	1023.63	910.014	839.889	789.686	DERL2
ENSG00000072864	842.88	816.054	895.488	718.634	NDE1
ENSG00000072954	168.386	124.409	176.258	134.998	TMEM38A
ENSG00000072958	2259.41	1996.64	1962.5	2037.15	AP1M1
ENSG00000073008	1310.93	1823.51	1733.01	2254.36	PVR
ENSG00000073050	1108.3	987.443	1201.87	986.6	XRCC1
ENSG00000073060	273.032	260.998	261.43	237.515	SCARB1
ENSG00000073067	35.1993	48.7197	29.5736	43.6459	CYP2W1
ENSG00000073111	3804.37	3583.51	2235.76	2498.98	MCM2
ENSG00000073150	58.0312	80.9094	117.111	183.719	PANX2
ENSG00000073169	800.07	845.634	699.119	780.551	SELENOO
ENSG00000073331	332.966	338.428	493.287	399.918	ALPK1
ENSG00000073350	3672.14	3093.7	2624.95	2716.19	LLGL2
ENSG00000073417	777.238	843.894	658.899	771.415	PDE8A
ENSG00000073464	93.2305	94.8293	100.55	96.4269	CLCN4
ENSG00000073536	785.8	749.935	1378.13	1228.17	NLE1
ENSG00000073578	7820.9	6606.73	7984.86	7071.65	SDHA
ENSG00000073584	3356.3	2730.04	2776.37	2288.87	SMARCE1
ENSG00000073605	78.0092	136.589	120.66	226.35	GSDMB
ENSG00000073614	1828.46	1991.42	1824.1	1803.69	KDM5A
ENSG00000073670	45.6639	42.6297	28.3906	41.6158	ADAM11
ENSG00000073711	459.493	477.627	476.726	402.963	PPP2R3A
ENSG00000073712	933.256	840.414	914.415	861.752	FERMT2
ENSG00000073792	884.738	1023.11	921.512	1157.12	IGF2BP2
ENSG00000073803	866.663	582.896	641.155	452.699	MAP3K13
ENSG00000073849	1369.92	1330.22	1866.68	1493.09	ST6GAL1
ENSG00000073905	13.3186	13.0499	15.3783	13.1953	VDAC1P1
ENSG00000073910	134.138	130.499	194.003	173.568	FRY
ENSG00000073921	6051.42	5314.79	4794.47	4227.56	PICALM
ENSG00000073969	1083.57	989.183	791.389	732.845	NSF
ENSG00000074047	280.643	601.166	282.723	662.808	GLI2
ENSG00000074054	2835.92	3226.81	3135.98	3466.29	CLASP1
ENSG00000074071	3066.14	2650.87	3118.24	3000.4	MRPS34
ENSG00000074201	2170.94	1786.1	2173.07	1685.95	CLNS1A
ENSG00000074211	1637.24	1880.93	2649.79	2915.14	PPP2R2C
ENSG00000074219	258.762	159.209	95.8183	107.592	TEAD2
ENSG00000074266	627.879	580.286	464.896	446.609	EED
ENSG00000074276	68.4959	73.9495	34.3053	57.8562	CDHR2
ENSG00000074319	1744.74	1255.4	1698.71	1191.63	TSG101
ENSG00000074356	1479.32	1833.08	1427.81	1946.81	NCBP3
ENSG00000074370	17.124	22.6198	35.4883	46.6909	ATP2A3
ENSG00000074410	2726.52	3732.27	5107.95	5359.31	CA12
ENSG00000074416	8949.18	8311.92	13448.9	13187.1	MGLL
ENSG00000074527	826.707	953.513	515.763	710.514	NTN4
ENSG00000074582	1063.59	1073.57	1274.03	1346.93	BCS1L
ENSG00000074590	697.326	796.914	663.631	727.77	NUAK1
ENSG00000074603	1876.98	2136.71	1471.58	1702.19	DPP8
ENSG00000074621	562.237	564.626	877.743	792.731	SLC24A1
ENSG00000074657	668.786	884.784	1072.93	1257.61	ZNF532
ENSG00000074660	192.169	278.398	366.712	503.45	SCARF1
ENSG00000074695	3294.46	3644.4	3906.08	3443.96	LMAN1
ENSG00000074696	6234.08	5556.65	5067.73	4251.92	HACD3
ENSG00000074755	2033	2785.72	1746.02	2492.89	ZZEF1
ENSG00000074800	69928.6	53978.8	66205.7	52319.2	ENO1
ENSG00000074842	2991.94	2500.36	3122.97	2812.62	MYDGF
ENSG00000074855	763.919	956.993	1019.7	1344.9	ANO8
ENSG00000074935	348.187	374.967	738.156	733.86	TUBE1
ENSG00000074964	1512.62	1196.24	1923.46	1645.35	ARHGEF10L
ENSG00000074966	5.70799	13.9199	11.8294	18.2704	TXK
ENSG00000075089	991.287	742.105	1004.32	641.493	ACTR6
ENSG00000075131	407.17	399.327	255.516	285.221	TIPIN
ENSG00000075142	4086.92	3140.68	3040.16	2483.75	SRI
ENSG00000075151	1670.54	1866.14	1922.28	2083.84	EIF4G3
ENSG00000075188	1129.23	856.074	1036.26	773.445	NUP37
ENSG00000075213	227.368	185.309	30.7565	25.3755	SEMA3A
ENSG00000075218	1762.82	1983.59	980.659	1118.55	GTSE1
ENSG00000075223	251.152	457.617	651.801	942.954	SEMA3C
ENSG00000075234	573.653	479.367	505.116	467.924	TTC38
ENSG00000075239	2267.02	1634.72	2738.51	1800.65	ACAT1
ENSG00000075240	1679.1	1630.37	2852.07	2368.04	GRAMD4
ENSG00000075275	6939.96	9746.54	7495.12	10482.1	CELSR1
ENSG00000075292	4041.26	4098.54	4207.73	3565.77	ZNF638
ENSG00000075303	1472.66	1319.78	1345.01	1124.64	SLC25A40
ENSG00000075336	917.084	750.805	819.779	687.169	TIMM21
ENSG00000075340	886.641	1046.6	1320.16	1471.78	ADD2
ENSG00000075391	3108.95	3857.55	2979.83	3459.19	RASAL2
ENSG00000075399	412.878	384.537	391.554	486.195	VPS9D1
ENSG00000075407	1277.64	1893.98	1479.86	1856.47	ZNF37A
ENSG00000075413	1169.19	1100.54	895.488	972.389	MARK3
ENSG00000075415	20872.2	15579.9	17325.4	14622.4	SLC25A3
ENSG00000075420	5116.26	6243.95	6156.03	5905.39	FNDC3B
ENSG00000075426	6631.73	8334.54	11537.2	11307.3	FOSL2
ENSG00000075461	174.094	267.958	221.21	302.476	CACNG4
ENSG00000075539	3456.19	3951.51	2897.03	3025.78	FRYL
ENSG00000075568	1842.73	2345.5	2032.3	2490.86	TMEM131
ENSG00000075618	8109.15	7674.22	9743.9	9727.95	FSCN1
ENSG00000075624	79047.1	74378.4	47521.2	57963.7	ACTB
ENSG00000075643	366.263	403.677	810.316	751.115	MOCOS
ENSG00000075651	239.736	236.638	422.311	307.551	PLD1
ENSG00000075702	527.038	726.445	184.539	408.038	WDR62
ENSG00000075711	2290.81	2251.54	2078.43	1968.12	DLG1
ENSG00000075785	7037.95	6055.16	6536.94	5408.03	RAB7A
ENSG00000075790	1127.33	1199.72	908.5	930.774	BCAP29
ENSG00000075826	238.784	429.777	215.296	504.465	SEC31B
ENSG00000075856	2560.03	2459.47	2438.04	2413.72	SART3
ENSG00000075886	19.0266	26.9698	8.2806	44.6609	TUBA3D
ENSG00000075891	496.595	765.595	159.697	377.588	PAX2
ENSG00000075914	897.106	753.415	828.06	843.482	EXOSC7
ENSG00000075945	762.017	674.245	786.657	678.034	KIFAP3
ENSG00000075975	1535.45	1342.4	1617.08	1359.11	MKRN2
ENSG00000076003	4029.84	3915.84	1721.18	2159.96	MCM6
ENSG00000076043	1419.39	1251.05	1625.36	1341.86	REXO2
ENSG00000076053	1133.04	879.564	1128.53	783.596	RBM7
ENSG00000076067	734.428	734.275	720.412	726.755	RBMS2
ENSG00000076108	4249.6	4943.31	4975.46	5552.16	BAZ2A
ENSG00000076201	2404.01	3241.6	2725.5	3735.27	PTPN23
ENSG00000076242	2076.76	1697.36	2032.3	1768.17	MLH1
ENSG00000076248	2195.67	2099.3	1439.64	1539.79	UNG
ENSG00000076258	42.8099	37.4097	46.1348	24.3605	FMO4
ENSG00000076321	446.174	390.627	418.762	414.128	KLHL20
ENSG00000076351	40.9073	43.4997	54.4154	57.8562	SLC46A1
ENSG00000076356	42.8099	63.5096	28.3906	65.9763	PLXNA2
ENSG00000076382	3024.28	3133.72	2566.99	2438.08	SPAG5
ENSG00000076513	622.171	553.316	498.019	435.444	ANKRD13A
ENSG00000076554	2300.32	2221.09	2646.24	2199.55	TPD52
ENSG00000076555	979.871	1026.59	1304.79	1239.34	ACACB
ENSG00000076604	1759.96	1706.93	2033.48	1972.18	TRAF4
ENSG00000076641	921.84	1339.79	1634.83	1930.57	PAG1
ENSG00000076650	319.647	294.058	364.346	326.837	GPATCH1
ENSG00000076685	1076.91	843.894	993.672	819.121	NT5C2
ENSG00000076716	4830.86	5393.96	4042.11	3776.89	GPC4
ENSG00000076770	541.308	669.025	360.797	512.585	MBNL3
ENSG00000076826	498.498	540.266	525.227	618.147	CAMSAP3
ENSG00000076864	341.528	322.768	481.458	477.06	RAP1GAP
ENSG00000076924	1641.05	1546.85	1872.6	1978.27	XAB2
ENSG00000076928	1261.47	1425.05	1272.85	1806.74	ARHGEF1
ENSG00000076944	1364.21	1319.78	1420.71	1650.42	STXBP2
ENSG00000076984	1906.47	2092.34	2134.03	2513.19	MAP2K7
ENSG00000077009	7.61065	5.21996	40.22	15.2253	NMRK2
ENSG00000077044	1915.98	2757.88	2655.71	3816.48	DGKD
ENSG00000077063	625.025	622.916	432.957	552.171	CTTNBP2
ENSG00000077092	11.416	20.0099	5.91471	8.12016	RARB
ENSG00000077097	9408.67	9241.95	6475.43	6157.11	TOP2B
ENSG00000077147	7735.28	8192.73	7049.15	7020.9	TM9SF3
ENSG00000077150	1569.7	1746.95	3156.09	2928.33	NFKB2
ENSG00000077152	1212	991.793	625.777	619.162	UBE2T
ENSG00000077157	403.365	555.056	475.543	569.426	PPP1R12B
ENSG00000077232	5639.49	6058.64	5855.57	5671.93	DNAJC10
ENSG00000077235	3785.35	4610.1	3025.97	3887.53	GTF3C1
ENSG00000077238	531.794	672.505	322.943	545.066	IL4R
ENSG00000077254	3338.22	2790.94	3125.33	2642.1	USP33
ENSG00000077264	65.6419	66.9895	59.1471	64.9613	PAK3
ENSG00000077312	2278.44	1943.57	2307.92	2040.19	SNRPA
ENSG00000077348	947.526	779.515	1289.41	975.434	EXOSC5
ENSG00000077380	8974.86	7064.35	8251.02	6030.24	DYNC1I2
ENSG00000077454	237.833	312.328	184.539	294.356	LRCH4
ENSG00000077458	648.808	722.965	599.752	613.072	FAM76B
ENSG00000077463	819.096	692.515	799.669	830.287	SIRT6
ENSG00000077514	952.283	914.364	630.508	666.868	POLD3
ENSG00000077549	3473.31	2850.1	2821.32	2529.43	CAPZB
ENSG00000077585	301.572	262.738	331.224	312.626	GPR137B
ENSG00000077616	17.124	42.6297	24.8418	23.3455	NAALAD2
ENSG00000077684	2456.34	3003.22	1779.15	1833.13	JADE1
ENSG00000077713	600.29	581.156	708.583	699.349	SLC25A43
ENSG00000077721	2501.05	2148.02	1839.48	1747.86	UBE2A
ENSG00000077782	1989.23	2616.07	1612.35	2130.53	FGFR1
ENSG00000077942	1202.48	1202.33	1682.14	1595.61	FBLN1
ENSG00000078018	154.116	124.409	224.759	142.103	MAP2
ENSG00000078043	764.871	859.554	765.364	847.542	PIAS2
ENSG00000078053	39.0046	37.4097	33.1224	34.5107	AMPH
ENSG00000078061	1240.54	1257.14	1116.7	1284	ARAF
ENSG00000078070	664.029	481.977	861.182	661.793	MCCC1
ENSG00000078081	4.75666	4.34997	65.0618	36.5407	LAMP3
ENSG00000078114	2999.55	2511.67	4243.22	3268.37	NEBL
ENSG00000078124	530.843	647.275	405.749	474.014	ACER3
ENSG00000078140	4274.33	4195.98	3225.88	3078.56	UBE2K
ENSG00000078142	1329.01	1171.88	1187.67	978.48	PIK3C3
ENSG00000078177	273.032	337.558	328.858	416.158	N4BP2
ENSG00000078237	232.125	251.428	137.221	173.568	TIGAR
ENSG00000078246	1291.91	1173.62	1090.67	996.75	TULP3
ENSG00000078269	5121.02	6160.43	6535.76	7132.55	SYNJ2
ENSG00000078295	16.1726	13.0499	7.09766	7.10514	ADCY2
ENSG00000078304	1847.49	1501.61	1887.98	1438.28	PPP2R5C
ENSG00000078319	301.572	261.868	298.102	287.251	PMS2P1
ENSG00000078369	8770.33	7889.11	8672.15	7333.52	GNB1
ENSG00000078401	39.9559	39.1497	8.2806	16.2403	EDN1
ENSG00000078403	1834.17	1910.51	2351.69	2038.16	MLLT10
ENSG00000078487	71.3499	71.3395	89.9036	102.517	ZCWPW1
ENSG00000078618	4461.74	4235.13	5008.58	4480.3	NRDC
ENSG00000078668	6663.13	4304.73	5190.75	3750.5	VDAC3
ENSG00000078674	5250.4	5172.98	6387.89	5079.16	PCM1
ENSG00000078687	215.952	304.498	190.454	256.8	TNRC6C
ENSG00000078699	1133.04	1284.98	1303.6	1434.22	CBFA2T2
ENSG00000078725	236.882	235.768	68.6107	92.3668	BRINP1
ENSG00000078747	1225.32	1100.54	1158.1	1083.03	ITCH
ENSG00000078804	839.074	665.545	850.536	639.463	TP53INP2
ENSG00000078808	2715.1	2716.99	2456.97	2602.51	SDF4
ENSG00000078814	14.27	22.6198	16.5612	41.6158	MYH7B
ENSG00000078900	189.315	225.328	514.58	418.188	TP73
ENSG00000078902	995.093	948.293	882.475	1007.92	TOLLIP
ENSG00000078967	215.001	188.789	199.917	189.809	UBE2D4
ENSG00000079134	735.379	782.125	566.629	688.184	THOC1
ENSG00000079150	54.2259	41.7597	39.0371	28.4206	FKBP7
ENSG00000079156	161.726	226.198	186.905	235.485	OSBPL6
ENSG00000079246	27855	22130	18249.3	15555.2	XRCC5
ENSG00000079257	709.693	420.207	739.339	479.09	LXN
ENSG00000079277	762.968	683.815	932.159	998.78	MKNK1
ENSG00000079308	2329.81	2890.99	3309.87	3439.9	TNS1
ENSG00000079313	1617.26	2194.99	1659.67	2327.44	REXO1
ENSG00000079332	3065.19	2753.53	2235.76	1941.73	SAR1A
ENSG00000079335	147.456	156.599	114.745	120.787	CDC14A
ENSG00000079337	2686.56	3993.27	2208.55	4304.7	RAPGEF3
ENSG00000079387	586.972	651.625	371.444	485.18	SENP1
ENSG00000079393	42.8099	31.3198	55.5983	47.706	DUSP13
ENSG00000079432	2071.05	2629.99	2518.48	3259.23	CIC
ENSG00000079435	7.61065	13.0499	8.2806	11.1652	LIPE
ENSG00000079459	2424.94	1897.46	1539.01	1318.51	FDFT1
ENSG00000079462	887.592	684.685	742.888	684.124	PAFAH1B3
ENSG00000079482	141.748	139.199	194.003	188.794	OPHN1
ENSG00000079616	2903.46	2744.83	2208.55	2218.83	KIF22
ENSG00000079691	2777.89	2583.01	1783.88	1697.11	CARMIL1
ENSG00000079739	3222.16	2634.34	3219.97	2913.11	PGM1
ENSG00000079785	6312.08	5076.41	5365.83	4275.27	DDX1
ENSG00000079805	21063.4	19158.1	20062.7	18148.6	DNM2
ENSG00000079819	4410.37	4679.7	3605.61	3819.52	EPB41L2
ENSG00000079931	413.829	352.348	330.041	245.635	MOXD1
ENSG00000079950	3702.58	2924.05	4291.72	2928.33	STX7
ENSG00000079974	790.556	729.925	760.632	898.293	RABL2B
ENSG00000079999	3798.67	3631.35	3751.11	3916.96	KEAP1
ENSG00000080031	10.4646	8.69994	22.4759	8.12016	PTPRH
ENSG00000080189	1305.23	1278.02	1185.31	1345.92	SLC35C2
ENSG00000080200	599.339	829.974	578.459	676.004	CRYBG3
ENSG00000080224	57.0799	77.4295	39.0371	38.5708	EPHA6
ENSG00000080293	65.6419	66.1195	40.22	63.9463	SCTR
ENSG00000080298	123.673	145.289	170.344	142.103	RFX3
ENSG00000080345	4900.31	6681.55	4129.65	4515.83	RIF1
ENSG00000080371	2279.39	2178.46	2257.05	2008.73	RAB21
ENSG00000080493	4633.94	3779.25	3205.77	1925.49	SLC4A4
ENSG00000080503	796.264	786.475	501.568	631.343	SMARCA2
ENSG00000080546	244.492	207.059	508.665	391.798	SESN1
ENSG00000080561	148.408	170.519	211.747	205.034	MID2
ENSG00000080603	253.054	381.927	169.161	288.266	SRCAP
ENSG00000080608	1843.68	1765.22	1443.19	1195.69	PUM3
ENSG00000080802	919.938	886.524	992.489	894.233	CNOT4
ENSG00000080815	1287.15	1224.95	1193.59	1003.86	PSEN1
ENSG00000080819	879.03	969.173	799.669	808.971	CPOX
ENSG00000080822	2709.39	2303.74	2777.55	2271.62	CLDND1
ENSG00000080823	85.6198	76.5595	62.696	68.0064	MOK
ENSG00000080824	42899.3	35587.1	25368.2	20736.9	HSP90AA1
ENSG00000080839	1030.29	1077.92	869.463	846.527	RBL1
ENSG00000080845	1648.66	1855.7	2823.68	2742.58	DLGAP4
ENSG00000080854	8.56198	14.7899	14.1953	17.2553	IGSF9B
ENSG00000080947	110.354	203.579	112.38	257.815	CROCCP3
ENSG00000080986	1448.88	1170.14	960.549	690.214	NDC80
ENSG00000081014	629.781	695.995	369.078	518.675	AP4E1
ENSG00000081019	643.1	661.195	661.265	586.682	RSBN1
ENSG00000081026	630.733	670.765	574.91	603.937	MAGI3
ENSG00000081052	280.643	348.868	477.909	488.225	COL4A4
ENSG00000081059	10.4646	21.7498	11.8294	24.3605	TCF7
ENSG00000081087	1210.09	1172.75	697.936	829.272	OSTM1
ENSG00000081154	4565.44	3851.46	5187.2	3726.14	PCNP
ENSG00000081177	638.343	608.126	836.34	762.28	EXD2
ENSG00000081181	9.51332	5.21996	59.1471	34.5107	ARG2
ENSG00000081189	8.56198	13.0499	30.7565	15.2253	MEF2C
ENSG00000081307	1322.35	1292.81	1323.71	1284	UBA5
ENSG00000081320	802.924	772.555	734.607	567.396	STK17B
ENSG00000081377	1145.4	1107.5	925.061	831.302	CDC14B
ENSG00000081386	605.998	657.715	719.229	584.652	ZNF510
ENSG00000081479	142.7	171.389	15.3783	12.1802	LRP2
ENSG00000081665	800.07	713.395	820.962	721.679	ZNF506
ENSG00000081692	271.129	249.688	176.258	210.109	JMJD4
ENSG00000081721	651.662	562.886	785.474	665.853	DUSP12
ENSG00000081760	988.433	852.594	1151	1105.36	AACS
ENSG00000081791	1981.62	1832.21	2272.43	2158.95	KIAA0141
ENSG00000081803	229.271	175.739	207.015	171.538	CADPS2
ENSG00000081870	1109.25	847.374	829.243	688.184	HSPB11
ENSG00000081913	171.24	225.328	88.7207	144.133	PHLPP1
ENSG00000081923	134.138	115.709	93.4525	105.562	ATP8B1
ENSG00000082014	1138.74	1036.16	1282.31	1298.21	SMARCD3
ENSG00000082068	845.734	642.926	855.267	704.424	WDR70
ENSG00000082146	1395.6	1090.1	1246.82	975.434	STRADB
ENSG00000082153	8950.13	7602.88	5744.37	5120.78	BZW1
ENSG00000082175	184.558	198.359	222.393	234.47	PGR
ENSG00000082196	31.3939	22.6198	43.7689	43.6459	C1QTNF3
ENSG00000082212	1222.46	1070.96	1277.58	1107.39	ME2
ENSG00000082213	991.287	871.734	660.082	644.538	C5orf22
ENSG00000082258	1626.78	1967.93	1447.92	1630.12	CCNT2
ENSG00000082269	473.763	526.346	558.349	522.735	FAM135A
ENSG00000082397	3791.06	3670.5	3238.9	2910.06	EPB41L3
ENSG00000082438	194.072	257.518	247.235	224.319	COBLL1
ENSG00000082458	998.898	988.313	1323.71	1094.19	DLG3
ENSG00000082482	109.403	110.489	14.1953	36.5407	KCNK2
ENSG00000082497	225.466	307.978	82.806	151.238	SERTAD4
ENSG00000082512	17.124	16.5299	28.3906	34.5107	TRAF5
ENSG00000082515	2020.63	1367.63	1535.46	1178.44	MRPL22
ENSG00000082516	1538.3	1521.62	1640.74	1579.37	GEMIN5
ENSG00000082641	13344.3	15012.6	29549.9	26021.1	NFE2L1
ENSG00000082684	124.624	215.758	112.38	117.742	SEMA5B
ENSG00000082701	1755.21	1939.22	1961.32	1991.47	GSK3B
ENSG00000082781	3389.59	3404.29	2966.82	3197.31	ITGB5
ENSG00000082805	2002.55	2435.98	1749.57	2011.77	ERC1
ENSG00000082898	12739.3	13229.1	13051.4	11587.5	XPO1
ENSG00000082996	1391.8	1143.17	1456.2	1062.73	RNF13
ENSG00000083093	714.45	758.635	897.853	740.965	PALB2
ENSG00000083097	295.864	343.648	188.088	250.71	DOPEY1
ENSG00000083099	1454.59	1193.63	1313.07	981.525	LYRM2
ENSG00000083123	924.694	757.765	641.155	590.742	BCKDHB
ENSG00000083168	1566.84	1971.41	1397.06	1726.55	KAT6A
ENSG00000083223	2116.71	2224.57	1763.77	1875.76	ZCCHC6
ENSG00000083290	110.354	133.979	184.539	208.079	ULK2
ENSG00000083312	3987.98	4268.19	4159.23	4019.48	TNPO1
ENSG00000083444	1445.07	1653.86	1710.53	1585.46	PLOD1
ENSG00000083457	426.197	285.358	282.723	245.635	ITGAE
ENSG00000083520	2622.82	2440.33	2503.11	2275.68	DIS3
ENSG00000083535	1085.47	856.074	913.232	678.034	PIBF1
ENSG00000083544	1094.98	989.183	1374.58	979.495	TDRD3
ENSG00000083635	485.179	422.817	451.884	338.002	NUFIP1
ENSG00000083642	1790.41	1884.41	1349.74	1299.23	PDS5B
ENSG00000083720	60.8852	38.2797	57.9642	44.6609	OXCT1
ENSG00000083750	508.011	403.677	583.191	424.278	RRAGB
ENSG00000083799	300.621	412.377	184.539	261.875	CYLD
ENSG00000083807	25.686	26.9698	28.3906	27.4055	SLC27A5
ENSG00000083812	153.164	168.779	141.953	156.313	ZNF324
ENSG00000083814	95.1332	110.489	123.026	103.532	ZNF671
ENSG00000083817	122.722	135.719	140.77	108.607	ZNF416
ENSG00000083828	258.762	236.638	229.491	234.47	ZNF586
ENSG00000083838	171.24	217.498	251.967	235.485	ZNF446
ENSG00000083844	721.109	890.874	1087.12	1163.21	ZNF264
ENSG00000083845	16557.9	10948	17370.3	12991.2	RPS5
ENSG00000083857	12220.8	17824.4	11972.6	13930.1	FAT1
ENSG00000083896	2748.4	2655.22	2723.13	2426.91	YTHDC1
ENSG00000083937	2778.84	2048.84	2332.76	1660.57	CHMP2B
ENSG00000084070	440.466	441.087	442.421	408.038	SMAP2
ENSG00000084072	1209.14	1309.34	1284.68	1307.35	PPIE
ENSG00000084073	2582.87	2635.21	1709.35	1732.64	ZMPSTE24
ENSG00000084090	6901.91	6768.55	6067.31	5498.36	STARD7
ENSG00000084092	1284.3	1005.71	1617.08	1320.54	NOA1
ENSG00000084093	1282.39	1375.46	1284.68	1370.28	REST
ENSG00000084112	924.694	1104.89	930.976	1201.78	SSH1
ENSG00000084207	1105.45	766.465	779.559	714.574	GSTP1
ENSG00000084234	11836.5	12550.5	13097.5	12864.4	APLP2
ENSG00000084444	84.6685	113.969	149.051	150.223	FAM234B
ENSG00000084463	3945.17	3671.37	3490.86	2914.12	WBP11
ENSG00000084623	6212.19	4053.3	5462.83	4122	EIF3I
ENSG00000084628	46.6152	48.7197	89.9036	69.0214	NKAIN1
ENSG00000084636	14.27	22.6198	22.4759	34.5107	COL16A1
ENSG00000084652	3069	3315.55	2603.66	3111.04	TXLNA
ENSG00000084676	696.375	776.905	606.85	672.958	NCOA1
ENSG00000084693	1822.75	1529.45	2090.26	1843.28	AGBL5
ENSG00000084710	229.271	257.518	182.173	229.395	EFR3B
ENSG00000084731	1084.52	1072.7	1460.93	1378.4	KIF3C
ENSG00000084733	8933.95	7458.46	9247.06	7107.17	RAB10
ENSG00000084754	8133.88	6491.02	7739.99	5997.75	HADHA
ENSG00000084764	253.054	214.019	268.528	319.731	MAPRE3
ENSG00000084774	2895.85	3871.47	3727.45	4833.53	CAD
ENSG00000085063	2203.28	1850.48	1941.21	1844.29	CD59
ENSG00000085117	57.0799	62.6396	76.8913	157.328	CD82
ENSG00000085185	318.696	472.407	348.968	413.113	BCORL1
ENSG00000085224	3782.49	4170.75	4169.87	3752.53	ATRX
ENSG00000085231	862.858	642.926	1007.87	723.709	AK6
ENSG00000085274	606.95	517.646	590.288	419.203	MYNN
ENSG00000085276	90.3765	119.189	59.1471	55.8261	MECOM
ENSG00000085365	2006.36	1695.62	1968.42	1555.01	SCAMP1
ENSG00000085377	1455.54	1286.72	1003.14	908.443	PREP
ENSG00000085382	486.13	416.727	427.042	414.128	HACE1
ENSG00000085415	1235.78	1229.3	1140.36	1109.42	SEH1L
ENSG00000085433	1096.89	952.643	1104.87	974.419	WDR47
ENSG00000085449	2655.17	2655.22	4048.03	3382.05	WDFY1
ENSG00000085465	123.673	54.8096	201.1	102.517	OVGP1
ENSG00000085491	3586.52	3325.99	3259.01	2935.44	SLC25A24
ENSG00000085511	1293.81	1530.32	1349.74	1508.32	MAP3K4
ENSG00000085514	39.9559	66.1195	26.0247	57.8562	PILRA
ENSG00000085563	528.94	553.316	176.258	228.38	ABCB1
ENSG00000085644	379.581	411.507	449.518	602.922	ZNF213
ENSG00000085662	5033.5	5504.45	5167.09	6362.15	AKR1B1
ENSG00000085719	3521.83	2837.92	4111.91	2951.68	CPNE3
ENSG00000085721	1887.44	1927.04	2149.41	2085.87	RRN3
ENSG00000085733	9228.87	9575.15	7976.58	10510.5	CTTN
ENSG00000085760	1946.42	1683.44	3007.04	1965.08	MTIF2
ENSG00000085788	1702.88	1873.1	1932.93	1832.11	DDHD2
ENSG00000085831	2910.12	2089.73	4557.88	2956.75	TTC39A
ENSG00000085832	1309.98	1291.94	1470.4	1373.32	EPS15
ENSG00000085840	843.831	789.085	611.581	603.937	ORC1
ENSG00000085871	655.467	441.957	489.738	365.407	MGST2
ENSG00000085872	1934.06	2402.05	1738.93	2186.35	CHERP
ENSG00000085978	1185.36	1284.98	1255.1	1458.58	ATG16L1
ENSG00000085982	1422.24	1592.09	1785.06	1721.47	USP40
ENSG00000085998	1964.5	1737.38	2008.64	1942.75	POMGNT1
ENSG00000085999	616.463	910.884	436.506	710.514	RAD54L
ENSG00000086015	1739.03	2036.66	2194.36	2429.96	MAST2
ENSG00000086061	4192.52	3647.88	2055.95	2068.61	DNAJA1
ENSG00000086062	2399.26	2659.57	1787.43	2041.21	B4GALT1
ENSG00000086065	1659.12	1058.78	1695.16	1145.96	CHMP5
ENSG00000086102	1068.35	1096.19	1585.14	1391.59	NFX1
ENSG00000086189	1168.24	942.203	1117.88	934.834	DIMT1
ENSG00000086200	1400.36	1250.18	1166.38	1058.67	IPO11
ENSG00000086232	5446.37	4991.16	5165.91	4675.18	EIF2AK1
ENSG00000086289	3939.46	3373.84	3532.27	3200.36	EPDR1
ENSG00000086300	1188.21	1085.75	1955.4	1448.43	SNX10
ENSG00000086475	2190.92	2141.06	1557.94	1748.88	SEPHS1
ENSG00000086504	2834.97	2192.38	1992.08	2018.88	MRPL28
ENSG00000086544	243.541	253.168	409.298	350.182	ITPKC
ENSG00000086570	77.0579	82.6494	85.1719	93.3819	FAT2
ENSG00000086589	2337.42	2187.16	2254.69	2037.15	RBM22
ENSG00000086598	10879.4	8503.32	8880.35	7156.91	TMED2
ENSG00000086619	286.351	287.968	277.992	229.395	ERO1B
ENSG00000086666	2668.48	1903.55	1917.55	1494.11	ZFAND6
ENSG00000086712	1200.58	1183.19	1194.77	1107.39	TXLNG
ENSG00000086717	8.56198	12.1799	24.8418	11.1652	PPEF1
ENSG00000086730	36.1506	54.8096	23.6589	46.6909	LAT2
ENSG00000086758	8827.41	10275.5	9605.49	9809.16	HUWE1
ENSG00000086827	890.446	776.035	714.497	607.997	ZW10
ENSG00000086848	195.974	201.839	260.247	252.74	ALG9
ENSG00000087008	343.431	290.578	391.554	339.017	ACOX3
ENSG00000087053	1932.15	1774.79	1712.9	1601.7	MTMR2
ENSG00000087074	2763.62	1915.73	5188.39	3821.55	PPP1R15A
ENSG00000087076	29.4913	23.4898	62.696	49.736	HSD17B14
ENSG00000087077	3647.41	3089.35	5154.08	4125.04	TRIP6
ENSG00000087085	9.51332	15.6599	17.7441	32.4806	ACHE
ENSG00000087086	62630.9	48694.4	73778.9	61068.7	FTL
ENSG00000087087	4232.47	4861.53	2161.24	3208.48	SRRT
ENSG00000087088	1863.66	1677.35	2414.39	2485.78	BAX
ENSG00000087095	596.485	625.526	455.433	505.48	NLK
ENSG00000087111	1381.33	1303.25	1068.2	1124.64	PIGS
ENSG00000087116	680.202	671.635	567.812	537.961	ADAMTS2
ENSG00000087152	2019.68	2243.71	1802.8	2172.14	ATXN7L3
ENSG00000087157	1096.89	1244.09	1056.37	1421.03	PGS1
ENSG00000087191	5580.51	4926.78	4271.61	4307.75	PSMC5
ENSG00000087206	1463.15	1290.2	1609.98	1316.48	UIMC1
ENSG00000087245	15.2213	8.69994	14.1953	12.1802	MMP2
ENSG00000087253	45.6639	68.7295	30.7565	40.6008	LPCAT2
ENSG00000087263	1147.31	1126.64	914.415	890.173	OGFOD1
ENSG00000087266	3504.71	4497	6579.53	7863.36	SH3BP2
ENSG00000087269	1935.01	1853.96	2097.36	1978.27	NOP14
ENSG00000087274	5615.71	5696.72	4346.13	4777.7	ADD1
ENSG00000087299	258.762	188.789	196.368	134.998	L2HGDH
ENSG00000087301	107.5	91.3494	76.8913	70.0364	TXNDC16
ENSG00000087302	1444.12	1154.48	1137.99	977.465	RTRAF
ENSG00000087338	5316.99	4691.01	6320.46	4586.88	GMCL1
ENSG00000087365	5859.25	5468.78	6222.28	5683.1	SF3B2
ENSG00000087448	1222.46	1598.18	1061.1	1498.17	KLHL42
ENSG00000087460	21612.3	18422.1	20170.4	18337.4	GNAS
ENSG00000087470	4435.11	3954.99	3709.71	3289.68	DNM1L
ENSG00000087494	16.1726	13.9199	11.8294	23.3455	PTHLH
ENSG00000087502	1954.03	1826.12	1556.75	1416.97	ERGIC2
ENSG00000087510	15.2213	17.3999	5.91471	15.2253	TFAP2C
ENSG00000087586	3889.04	3489.55	2931.33	2259.44	AURKA
ENSG00000087842	506.108	390.627	522.861	439.504	PIR
ENSG00000087884	312.037	175.739	254.333	191.839	AAMDC
ENSG00000087903	194.072	193.139	240.137	228.38	RFX2
ENSG00000087995	1058.83	948.293	1022.06	901.338	METTL2A
ENSG00000088035	558.432	580.286	438.872	468.939	ALG6
ENSG00000088038	1320.45	1520.75	1240.91	1483.96	CNOT3
ENSG00000088179	508.011	538.526	605.667	518.675	PTPN4
ENSG00000088205	7582.11	6645.01	5982.14	5094.39	DDX18
ENSG00000088247	9225.06	10037.1	7755.37	8958.57	KHSRP
ENSG00000088256	2175.7	2383.78	1631.28	2041.21	GNA11
ENSG00000088280	30.4426	20.0099	28.3906	29.4356	ASAP3
ENSG00000088298	1012.22	782.995	999.586	752.13	EDEM2
ENSG00000088305	112.257	152.249	131.307	159.358	DNMT3B
ENSG00000088325	7107.4	6827.71	5836.64	4859.92	TPX2
ENSG00000088340	227.368	436.737	195.186	444.579	FER1L4
ENSG00000088356	659.273	545.486	612.764	520.705	PDRG1
ENSG00000088367	1095.93	903.054	1104.87	1027.2	EPB41L1
ENSG00000088387	362.457	490.677	406.932	409.053	DOCK9
ENSG00000088448	3891.9	4478.73	3811.44	4491.46	ANKRD10
ENSG00000088451	492.79	372.357	629.325	415.143	TGDS
ENSG00000088538	753.455	1022.24	1004.32	1544.86	DOCK3
ENSG00000088543	33.2966	33.9298	35.4883	41.6158	C3orf18
ENSG00000088682	2457.29	1852.22	2693.56	2078.76	COQ9
ENSG00000088727	488.984	374.967	475.543	367.437	KIF9
ENSG00000088756	26.6373	22.6198	18.9271	24.3605	ARHGAP28
ENSG00000088766	1489.79	1331.96	1334.36	1018.07	CRLS1
ENSG00000088808	185.51	196.619	153.783	171.538	PPP1R13B
ENSG00000088812	1256.71	1619.06	1230.26	1435.24	ATRN
ENSG00000088826	414.781	472.407	565.447	780.551	SMOX
ENSG00000088832	8218.55	6212.63	6094.52	5385.7	FKBP1A
ENSG00000088833	2188.06	1810.46	1980.25	1731.62	NSFL1C
ENSG00000088836	76.1065	139.199	43.7689	134.998	SLC4A11
ENSG00000088854	645.003	682.945	1024.43	993.705	C20orf194
ENSG00000088876	308.231	337.558	495.653	447.624	ZNF343
ENSG00000088881	174.094	228.808	261.43	359.317	EBF4
ENSG00000088888	4787.1	5598.41	5436.8	6450.45	MAVS
ENSG00000088899	236.882	198.359	231.857	197.929	LZTS3
ENSG00000088930	5557.68	4456.11	4257.41	3497.76	XRN2
ENSG00000088970	280.643	194.879	350.151	237.515	KIZ
ENSG00000088986	5744.14	4239.48	4693.92	3680.46	DYNLL1
ENSG00000088992	152.213	136.589	113.562	121.802	TESC
ENSG00000089006	4965	4016.76	4508.19	3651.03	SNX5
ENSG00000089009	31224.6	22295.3	33476.1	24106.7	RPL6
ENSG00000089022	1535.45	1510.31	1447.92	1601.7	MAPKAPK5
ENSG00000089048	1570.65	1671.26	2112.74	1575.31	ESF1
ENSG00000089050	688.764	588.116	823.328	648.598	RBBP9
ENSG00000089053	2790.26	2623.9	2226.3	2397.48	ANAPC5
ENSG00000089057	586.972	692.515	476.726	747.055	SLC23A2
ENSG00000089060	234.979	281.008	347.785	402.963	SLC8B1
ENSG00000089063	2757.91	2134.1	2753.89	2078.76	TMEM230
ENSG00000089091	148.408	148.769	157.331	161.388	DZANK1
ENSG00000089094	778.189	865.644	561.898	778.521	KDM2B
ENSG00000089123	199.78	193.139	224.759	170.523	TASP1
ENSG00000089127	34.2479	21.7498	14.1953	21.3154	OAS1
ENSG00000089154	4844.18	5909.87	4521.21	5577.54	GCN1
ENSG00000089157	65147.2	41855.4	72791.2	49576.6	RPLP0
ENSG00000089159	3756.81	3861.9	3611.52	3922.04	PXN
ENSG00000089177	581.264	505.466	663.631	467.924	KIF16B
ENSG00000089195	802.924	799.524	520.495	574.501	TRMT6
ENSG00000089220	5022.08	3754.02	4653.7	3424.68	PEBP1
ENSG00000089234	1059.78	926.544	1111.97	926.714	BRAP
ENSG00000089248	4238.18	3778.38	4900.93	3885.5	ERP29
ENSG00000089280	14991.1	15616.4	8773.89	12355.8	FUS
ENSG00000089289	1958.79	1369.37	2648.61	1811.81	IGBP1
ENSG00000089327	827.658	758.635	1256.29	1250.5	FXYD5
ENSG00000089335	305.377	306.238	411.664	340.032	ZNF302
ENSG00000089351	2466.8	2186.29	3484.95	3200.36	GRAMD1A
ENSG00000089486	1173.94	1052.69	1514.17	1314.45	CDIP1
ENSG00000089505	17.124	20.8799	26.0247	20.3004	CMTM1
ENSG00000089597	9080.46	10856.7	10150.8	10472	GANAB
ENSG00000089639	381.484	428.037	535.873	648.598	GMIP
ENSG00000089682	511.816	608.996	503.934	703.409	RBM41
ENSG00000089685	5414.03	4517.01	3505.06	2963.86	BIRC5
ENSG00000089692	24.7346	53.9396	24.8418	51.766	LAG3
ENSG00000089693	7395.65	6096.92	7369.73	6239.33	MLF 2.00
ENSG00000089723	37.1019	48.7197	62.696	44.6609	OTUB2
ENSG00000089737	2213.75	2042.75	1606.44	1632.15	DDX24
ENSG00000089775	228.32	282.748	403.383	504.465	ZBTB25
ENSG00000089818	652.613	662.065	631.691	670.928	NECAP1
ENSG00000089820	678.299	789.954	863.548	1163.21	ARHGAP4
ENSG00000089847	39.9559	43.4997	79.2572	74.0965	ANKRD24
ENSG00000089876	1446.02	1256.27	1504.7	1301.26	DHX32
ENSG00000089902	830.512	995.273	835.157	821.151	RCOR1
ENSG00000089916	1229.12	1414.61	1787.43	1745.83	GPATCH2L
ENSG00000090006	126.527	129.629	203.466	285.221	LTBP4
ENSG00000090013	1079.76	700.345	2005.09	1220.05	BLVRB
ENSG00000090020	195.974	267.958	179.807	278.116	SLC9A1
ENSG00000090054	4798.52	4276.02	4560.24	3752.53	SPTLC1
ENSG00000090060	5917.28	5604.5	4886.74	4289.48	PAPOLA
ENSG00000090061	340.577	357.568	346.602	349.167	CCNK
ENSG00000090097	1104.5	1010.93	1039.81	1290.09	PCBP4
ENSG00000090238	52.3232	30.4498	56.7812	59.8862	YPEL3
ENSG00000090263	910.424	664.675	842.255	582.622	MRPS33
ENSG00000090266	2993.84	2133.23	2012.19	1651.44	NDUFB2
ENSG00000090273	2747.45	2625.64	2317.38	2363.98	NUDC
ENSG00000090316	3506.61	3094.57	3096.94	3063.33	MAEA
ENSG00000090372	2723.66	2934.49	2538.59	2943.56	STRN4
ENSG00000090432	708.742	662.065	590.288	596.832	MUL1
ENSG00000090447	358.652	377.577	527.592	591.757	TFAP4
ENSG00000090470	961.796	814.314	965.281	881.038	PDCD7
ENSG00000090487	3208.84	2537.77	3308.69	2493.9	SPG21
ENSG00000090520	1049.32	1085.75	677.826	747.055	DNAJB11
ENSG00000090530	94.1818	122.669	36.6712	58.8712	P3H2
ENSG00000090539	19.978	28.7098	42.5859	50.751	CHRD
ENSG00000090565	1936.91	2066.24	1617.08	1887.94	RAB11FIP3
ENSG00000090581	914.23	849.114	897.853	859.722	GNPTG
ENSG00000090612	817.194	827.364	628.143	654.688	ZNF268
ENSG00000090615	1299.52	1819.16	1346.19	1996.54	GOLGA3
ENSG00000090621	11090.6	10165	15417.3	12307.1	PABPC4
ENSG00000090661	612.658	469.797	749.986	556.231	CERS4
ENSG00000090674	347.236	359.307	263.796	354.242	MCOLN1
ENSG00000090686	1702.88	1766.09	1859.59	1726.55	USP48
ENSG00000090776	479.471	483.717	477.909	542.021	EFNB1
ENSG00000090857	1004.61	1389.38	1147.45	1220.05	PDPR
ENSG00000090861	4437.01	4602.27	9870.47	8034.9	AARS
ENSG00000090863	2285.1	2783.98	2257.05	2639.05	GLG1
ENSG00000090889	2504.86	2422.93	2039.39	1773.24	KIF4A
ENSG00000090905	1896	2643.91	1653.75	2121.39	TNRC6A
ENSG00000090924	786.751	1001.36	642.338	1030.25	PLEKHG2
ENSG00000090971	539.405	508.076	679.009	549.126	NAT14
ENSG00000090975	193.12	219.238	202.283	280.146	PITPNM2
ENSG00000090989	994.141	807.354	988.94	885.098	EXOC1
ENSG00000091009	923.743	979.613	689.656	700.364	RBM27
ENSG00000091039	3514.22	3680.94	2843.79	2560.9	OSBPL8
ENSG00000091073	170.288	198.359	194.003	282.176	DTX2
ENSG00000091106	9.51332	14.7899	14.1953	15.2253	NLRC4
ENSG00000091127	922.792	1001.36	843.438	824.196	PUS7
ENSG00000091129	18206.6	19679.3	24146.2	21424	NRCAM
ENSG00000091136	12654.6	13717.2	19957.4	17346.7	LAMB1
ENSG00000091137	19.0266	17.3999	18.9271	13.1953	SLC26A4
ENSG00000091140	5234.23	4262.1	4055.13	3515.02	DLD
ENSG00000091157	251.152	297.538	170.344	230.41	WDR7
ENSG00000091164	1952.13	1535.54	1931.75	1362.16	TXNL1
ENSG00000091262	15.2213	25.2298	7.09766	19.2854	ABCC6
ENSG00000091317	2826.41	2684.8	1440.82	1523.55	CMTM6
ENSG00000091409	1305.23	1707.8	1417.17	1846.32	ITGA6
ENSG00000091428	45.6639	80.0394	80.4401	77.1415	RAPGEF4
ENSG00000091436	3047.11	3206.8	4089.43	3425.69	MAP3K20
ENSG00000091483	4613.96	3625.26	2872.18	2581.2	FH
ENSG00000091490	1971.16	2224.57	3571.3	3676.4	SEL1L3
ENSG00000091527	3618.87	3772.29	3751.11	3352.61	CDV3
ENSG00000091542	1997.8	2000.99	2443.96	2213.76	ALKBH5
ENSG00000091592	7.61065	7.82995	20.11	24.3605	NLRP1
ENSG00000091622	479.471	509.816	1415.98	1391.59	PITPNM3
ENSG00000091640	1439.36	1166.66	1428.99	1246.44	SPAG7
ENSG00000091651	714.45	705.565	423.493	528.826	ORC6
ENSG00000091656	1536.4	1954.01	1214.88	1468.73	ZFHX4
ENSG00000091732	1189.16	1052.69	1734.19	1305.32	ZC3HC1
ENSG00000091844	496.595	563.756	700.302	742.995	RGS17
ENSG00000091947	813.388	663.805	1033.89	803.896	TMEM101
ENSG00000091986	139.846	168.779	150.234	143.118	CCDC80
ENSG00000092010	2156.67	1469.42	1996.81	1503.25	PSME1
ENSG00000092020	340.577	228.808	354.883	256.8	PPP2R3C
ENSG00000092036	456.639	331.468	725.144	487.21	HAUS4
ENSG00000092094	341.528	348.868	263.796	334.957	OSGEP
ENSG00000092096	20.9293	19.1399	11.8294	18.2704	SLC22A17
ENSG00000092098	369.117	388.887	378.542	387.738	RNF31
ENSG00000092108	928.5	789.085	881.292	713.559	SCFD1
ENSG00000092140	683.056	698.605	592.654	514.615	G2E3
ENSG00000092148	3552.27	3752.28	5846.1	4184.93	HECTD1
ENSG00000092199	21351.7	15389.3	17235.5	12325.4	HNRNPC
ENSG00000092201	4003.2	4023.72	3496.78	3400.32	SUPT16H
ENSG00000092203	1441.27	1189.28	1548.47	1149	TOX4
ENSG00000092208	201.682	158.339	184.539	155.298	GEMIN2
ENSG00000092295	14.27	20.8799	13.0124	28.4206	TGM1
ENSG00000092330	545.113	391.497	553.617	373.527	TINF2
ENSG00000092377	12.3673	11.3099	23.6589	13.1953	TBL1Y
ENSG00000092421	5962.95	7491.52	4466.79	5084.24	SEMA6A
ENSG00000092439	2345.98	2342.02	2879.28	2416.76	TRPM7
ENSG00000092445	995.093	898.704	1141.54	1182.5	TYRO3
ENSG00000092470	817.194	871.734	335.956	588.712	WDR76
ENSG00000092529	60.8852	26.0998	93.4525	34.5107	CAPN3
ENSG00000092531	1071.2	853.464	979.476	703.409	SNAP23
ENSG00000092621	5230.42	5356.55	9746.26	8900.71	PHGDH
ENSG00000092758	29.4913	38.2797	27.2077	23.3455	COL9A3
ENSG00000092820	15334.5	13364	11904	10585.6	EZR
ENSG00000092841	19998.9	13402.3	14822.3	11269.8	MYL6
ENSG00000092847	1734.28	1932.26	1602.89	1770.2	AGO1
ENSG00000092853	1401.31	1662.56	341.87	862.767	CLSPN
ENSG00000092871	531.794	592.466	467.262	666.868	RFFL
ENSG00000092929	3174.59	3300.76	3650.56	3959.59	UNC13D
ENSG00000092931	563.188	597.686	501.568	537.961	MFSD11
ENSG00000092964	2607.6	2881.42	3320.52	3447.01	DPYSL2
ENSG00000092978	633.587	669.025	487.372	508.525	GPATCH2
ENSG00000093000	3061.38	3601.77	2254.69	2760.86	NUP50
ENSG00000093009	1100.69	1138.82	455.433	670.928	CDC45
ENSG00000093010	2585.72	2402.92	3856.39	3823.58	COMT
ENSG00000093100	4.75666	15.6599	3.54883	18.2704	AC016026.1
ENSG00000093144	2688.46	2218.48	2191.99	1903.16	ECHDC1
ENSG00000093167	2611.41	2580.4	2763.35	2462.44	LRRFIP2
ENSG00000093183	2401.16	2308.09	1951.86	1972.18	SEC22C
ENSG00000093217	127.478	181.829	152.6	182.704	XYLB
ENSG00000094631	1725.72	1866.14	2216.83	2363.98	HDAC6
ENSG00000094804	1442.22	1389.38	552.434	806.941	CDC6
ENSG00000094841	583.166	423.687	443.603	370.482	UPRT
ENSG00000094880	2887.29	2530.81	2506.66	2283.8	CDC23
ENSG00000094914	1187.26	1100.54	1096.59	1105.36	AAAS
ENSG00000094916	8542.96	9904.88	7734.08	9480.29	CBX5
ENSG00000094975	2374.52	2424.67	1927.01	1796.59	SUCO
ENSG00000095002	2982.42	2598.67	2375.35	2158.95	MSH2
ENSG00000095015	1182.51	1238	496.836	521.72	MAP3K1
ENSG00000095059	1408.92	1320.65	1611.17	1806.74	DHPS
ENSG00000095066	229.271	227.068	346.602	463.864	HOOK2
ENSG00000095139	3920.44	3951.51	3946.3	3594.19	ARCN1
ENSG00000095203	225.466	224.458	146.685	172.553	EPB41L4B
ENSG00000095209	1673.39	1342.4	1643.11	1369.26	TMEM38B
ENSG00000095261	2637.09	2390.74	2507.84	2115.3	PSMD5
ENSG00000095303	24.7346	25.2298	27.2077	41.6158	PTGS1
ENSG00000095319	3262.12	3752.28	2267.7	2827.85	NUP188
ENSG00000095321	2244.19	1900.94	3076.83	2730.4	CRAT
ENSG00000095380	1180.6	1025.72	1102.5	1027.2	NANS
ENSG00000095383	1428.9	1456.37	2643.88	2708.07	TBC1D2
ENSG00000095397	503.254	620.306	797.303	1020.1	WHRN
ENSG00000095464	3.80533	12.1799	10.6465	20.3004	PDE6C
ENSG00000095485	883.787	814.314	906.134	816.076	CWF19L1
ENSG00000095539	70.3985	107.009	86.3548	179.659	SEMA4G
ENSG00000095564	4200.13	5166.89	4667.89	4686.35	BTAF1
ENSG00000095574	334.869	341.908	395.103	343.077	IKZF5
ENSG00000095587	77.0579	92.2194	43.7689	77.1415	TLL2
ENSG00000095637	28.5399	36.5397	36.6712	27.4055	SORBS1
ENSG00000095713	186.461	334.948	210.564	374.542	CRTAC1
ENSG00000095739	254.006	267.958	234.223	257.815	BAMBI
ENSG00000095777	390.046	425.427	499.202	455.744	MYO3A
ENSG00000095787	4686.26	4736.25	5712.43	4989.84	WAC
ENSG00000095794	393.851	331.468	391.554	289.281	CREM
ENSG00000095906	1664.83	1335.44	1148.64	1406.82	NUBP2
ENSG00000095932	237.833	114.839	229.491	85.2617	SMIM24
ENSG00000095951	305.377	421.077	266.162	411.083	HIVEP1
ENSG00000096060	390.046	484.587	189.271	327.852	FKBP5
ENSG00000096063	2654.21	2622.16	2435.68	2257.41	SRPK1
ENSG00000096070	923.743	1131.86	985.391	1185.54	BRPF3
ENSG00000096080	804.826	643.796	721.595	592.772	MRPS18A
ENSG00000096092	918.035	588.116	544.154	407.023	TMEM14A
ENSG00000096093	878.079	981.353	970.013	1028.22	EFHC1
ENSG00000096384	60987	53050.5	67563.8	51336.7	HSP90AB1
ENSG00000096401	3457.14	2928.4	3221.15	2318.31	CDC5L
ENSG00000096433	9297.36	11721.4	13254.9	16548.9	ITPR3
ENSG00000096654	324.404	295.798	242.503	210.109	ZNF184
ENSG00000096696	6435.76	7766.44	9751	9590.93	DSP
ENSG00000096717	748.698	816.054	958.183	874.947	SIRT1
ENSG00000096746	5417.83	5552.3	5609.51	4925.89	HNRNPH3
ENSG00000096872	20.9293	29.5798	27.2077	12.1802	IFT74
ENSG00000096968	195.974	175.739	171.527	171.538	JAK2
ENSG00000097007	4975.46	5853.32	4709.29	5597.84	ABL1
ENSG00000097021	1593.48	1305.86	1084.76	1118.55	ACOT7
ENSG00000097033	3726.37	3387.76	3775.95	3204.42	SH3GLB1
ENSG00000097046	653.565	622.916	276.809	385.708	CDC7
ENSG00000097096	143.651	209.669	97.0013	129.923	SYDE2
ENSG00000099139	584.118	694.255	274.443	368.452	PCSK5
ENSG00000099194	4644.4	4262.1	9043.6	5804.9	SCD
ENSG00000099203	219.758	190.529	333.59	265.935	TMED1
ENSG00000099204	2969.11	2832.7	3460.11	3480.5	ABLIM1
ENSG00000099219	1429.85	1514.66	1928.2	1684.93	ERMP1
ENSG00000099246	4691.02	3729.66	3584.32	2867.43	RAB18
ENSG00000099250	621.219	836.934	246.052	422.248	NRP1
ENSG00000099251	57.0799	80.9094	82.806	86.2767	HSD17B7P2
ENSG00000099282	254.957	247.948	153.783	165.448	TSPAN15
ENSG00000099284	466.152	455.007	351.334	348.152	H2AFY2
ENSG00000099290	1780.89	1653.86	2076.06	1723.5	WASHC2A
ENSG00000099308	325.355	355.828	539.422	563.336	MAST3
ENSG00000099326	926.597	1444.19	985.391	1458.58	MZF1
ENSG00000099330	190.266	147.029	220.027	177.629	OCEL1
ENSG00000099331	2033	2585.62	1969.6	2586.27	MYO9B
ENSG00000099338	8.56198	22.6198	24.8418	34.5107	CATSPERG
ENSG00000099341	4140.19	3043.24	4031.47	3242.99	PSMD8
ENSG00000099364	1720.96	2012.3	1964.87	2098.05	FBXL19
ENSG00000099365	35.1993	46.9797	40.22	75.1115	STX1B
ENSG00000099377	234.979	205.319	430.591	378.603	HSD3B7
ENSG00000099381	1173.94	1555.55	992.489	1524.56	SETD1A
ENSG00000099385	1312.84	903.054	1376.95	907.428	BCL7C
ENSG00000099617	68.4959	91.3494	82.806	106.577	EFNA2
ENSG00000099622	3069.95	2924.92	3486.13	3756.59	CIRBP
ENSG00000099624	5453.98	4191.63	4570.89	4046.89	ATP5F1D
ENSG00000099625	27.5886	29.5798	31.9394	42.6309	CBARP
ENSG00000099725	372.922	614.216	553.617	974.419	PRKY
ENSG00000099783	11961.1	11363.9	7577.93	8186.14	HNRNPM
ENSG00000099785	76.1065	59.1596	39.0371	40.6008	MARCH2
ENSG00000099795	3286.85	2130.62	2514.94	2043.24	NDUFB7
ENSG00000099797	3400.06	2728.3	2277.16	2220.86	TECR
ENSG00000099800	2646.6	2184.55	2054.77	2028.01	TIMM13
ENSG00000099804	1604.9	1434.62	1780.33	1541.82	CDC34
ENSG00000099810	913.278	951.773	877.743	854.647	MTAP
ENSG00000099812	24.7346	32.1898	62.696	66.9913	MISP
ENSG00000099814	979.871	1449.41	1026.79	1707.26	CEP170B
ENSG00000099817	4796.61	4175.1	3492.05	3667.27	POLR2E
ENSG00000099821	1695.27	2009.69	2102.09	2579.17	POLRMT
ENSG00000099822	357.701	363.657	509.848	510.555	HCN2
ENSG00000099834	38.0533	72.2095	75.7083	193.869	CDHR5
ENSG00000099840	21.8806	40.8897	40.22	56.8411	IZUMO4
ENSG00000099849	1111.16	1033.55	1062.28	1220.05	RASSF7
ENSG00000099860	1187.26	1325	1102.5	1126.67	GADD45B
ENSG00000099864	478.52	419.337	576.093	486.195	PALM
ENSG00000099866	11.416	19.1399	13.0124	26.3905	MADCAM1
ENSG00000099875	2904.42	2763.97	7834.63	6297.19	MKNK2
ENSG00000099889	422.391	535.046	624.594	832.317	ARVCF
ENSG00000099899	1160.62	1268.45	1291.77	1580.39	TRMT2A
ENSG00000099901	5694.67	4757.13	2951.44	3351.6	RANBP1
ENSG00000099904	851.442	1202.33	1001.95	1499.18	ZDHHC8
ENSG00000099910	602.193	507.206	337.139	432.399	KLHL22
ENSG00000099917	2635.19	2911	3151.36	3535.32	MED15
ENSG00000099940	936.11	823.014	874.195	817.091	SNAP29
ENSG00000099942	3849.09	4677.96	5527.89	6066.78	CRKL
ENSG00000099949	1245.29	1738.25	1240.91	1875.76	LZTR1
ENSG00000099953	55.1772	26.9698	63.8789	42.6309	MMP11
ENSG00000099954	67.5445	89.6094	121.843	136.013	CECR2
ENSG00000099956	3348.69	2580.4	3089.85	2725.33	SMARCB1
ENSG00000099957	54.2259	70.4695	52.0495	101.502	P2RX6
ENSG00000099958	78.0092	71.3395	54.4154	64.9613	DERL3
ENSG00000099968	3563.69	2835.31	5197.85	3924.07	BCL2L13
ENSG00000099974	151.262	179.219	156.148	182.704	DDTL
ENSG00000099977	1851.29	1401.56	1605.25	1338.81	DDT
ENSG00000099991	2693.22	2904.04	2615.49	2788.26	CABIN1
ENSG00000099992	521.33	441.957	597.386	560.291	TBC1D10A
ENSG00000099994	14.27	20.0099	15.3783	12.1802	SUSD2
ENSG00000099995	4885.09	5007.69	4150.95	4383.87	SF3A1
ENSG00000099999	423.343	501.987	548.885	575.516	RNF215
ENSG00000100003	1380.38	1026.59	1887.98	1321.56	SEC14L2
ENSG00000100014	619.317	737.755	616.313	708.484	SPECC1L
ENSG00000100023	1066.44	1305.86	781.925	1152.05	PPIL2
ENSG00000100027	136.04	93.9593	204.649	165.448	YPEL1
ENSG00000100028	3872.87	3148.51	2514.94	2109.21	SNRPD3
ENSG00000100029	5803.12	5123.39	6193.89	5496.33	PES 1.00
ENSG00000100030	4677.7	4705.8	4154.49	3830.69	MAPK1
ENSG00000100031	3339.17	3190.27	2375.35	2467.51	GGT1
ENSG00000100033	16.1726	1.73999	24.8418	28.4206	PRODH
ENSG00000100034	1115.91	1139.69	1294.14	1309.38	PPM1F
ENSG00000100036	175.045	161.819	133.673	149.208	SLC35E4
ENSG00000100038	58.9826	85.2594	80.4401	97.4419	TOP3B
ENSG00000100055	58.9826	81.7794	61.513	82.2166	CYTH4
ENSG00000100056	589.826	582.026	506.299	534.916	ESS2
ENSG00000100058	704.937	629.006	642.338	588.712	CRYBB2P1
ENSG00000100060	43.7613	122.669	43.7689	140.073	MFNG
ENSG00000100065	2292.71	3095.44	2330.4	3336.37	CARD10
ENSG00000100068	136.992	226.198	115.928	287.251	LRP5L
ENSG00000100075	4712.9	3918.45	4444.32	3978.88	SLC25A1
ENSG00000100077	195.974	287.968	192.82	261.875	GRK3
ENSG00000100079	44.7126	20.8799	31.9394	20.3004	LGALS2
ENSG00000100083	1380.38	1782.62	1604.07	2114.29	GGA1
ENSG00000100084	492.79	560.276	379.725	466.909	HIRA
ENSG00000100092	16.1726	22.6198	20.11	43.6459	SH3BP1
ENSG00000100097	23750	16539.5	25279.5	19813.2	LGALS1
ENSG00000100099	1031.24	1222.34	1626.55	1885.91	HPS4
ENSG00000100100	54.2259	35.6698	10.6465	24.3605	PIK3IP1
ENSG00000100104	426.197	388.017	456.616	415.143	SRRD
ENSG00000100105	987.482	1029.2	1397.06	1434.22	PATZ1
ENSG00000100106	3242.14	3342.52	3378.48	3507.91	TRIOBP
ENSG00000100109	994.141	874.344	1022.06	886.113	TFIP11
ENSG00000100116	70.3985	41.7597	108.831	71.0514	GCAT
ENSG00000100124	733.477	682.945	561.898	589.727	ANKRD54
ENSG00000100129	6470.01	4734.51	6801.92	5099.46	EIF3L
ENSG00000100138	3873.82	3019.75	3369.02	2768.98	SNU13
ENSG00000100139	1127.33	1405.91	1565.03	2233.04	MICALL1
ENSG00000100147	79.9118	78.2995	59.1471	90.3368	CCDC134
ENSG00000100150	968.455	994.403	830.426	861.752	DEPDC5
ENSG00000100151	947.526	944.813	829.243	1002.84	PICK1
ENSG00000100154	895.203	1050.08	1194.77	1352.01	TTC28
ENSG00000100156	12.3673	46.9797	8.2806	43.6459	SLC16A8
ENSG00000100162	514.67	514.166	365.529	387.738	CENPM
ENSG00000100167	37.1019	31.3198	43.7689	38.5708	SEPT3
ENSG00000100196	170.288	160.949	221.21	222.289	KDELR3
ENSG00000100197	11.416	15.6599	22.4759	32.4806	CYP2D6
ENSG00000100201	18472	21628.9	18911.7	22455.3	DDX17
ENSG00000100207	1810.38	2111.48	1729.46	2035.12	TCF20
ENSG00000100209	285.399	170.519	332.407	231.425	HSCB
ENSG00000100211	632.635	421.077	647.07	480.105	CBY1
ENSG00000100216	3759.66	2835.31	2992.84	2405.6	TOMM22
ENSG00000100218	49.4692	27.8398	29.5736	23.3455	RSPH14
ENSG00000100219	1857.95	1913.12	3884.78	3394.23	XBP1
ENSG00000100220	2676.1	2239.36	1879.7	1879.82	RTCB
ENSG00000100221	1814.19	1879.19	2668.72	2556.84	JOSD1
ENSG00000100225	3044.26	2616.07	3361.92	2944.57	FBXO7
ENSG00000100226	922.792	1003.1	755.9	902.353	GTPBP1
ENSG00000100227	3650.26	3450.4	3954.58	3474.41	POLDIP3
ENSG00000100228	355.798	313.198	412.847	368.452	RAB36
ENSG00000100234	142.7	128.759	542.971	319.731	TIMP3
ENSG00000100239	1838.92	1883.54	1553.2	2095	PPP6R2
ENSG00000100241	6305.43	6811.18	7865.39	8908.83	SBF1
ENSG00000100242	2133.84	2750.05	2938.43	3083.63	SUN2
ENSG00000100243	4150.66	3904.53	3523.99	3958.58	CYB5R3
ENSG00000100246	594.582	428.907	798.486	567.396	DNAL4
ENSG00000100253	312.988	227.938	326.492	322.776	MIOX
ENSG00000100258	2042.51	2473.39	2371.8	2933.41	LMF2
ENSG00000100263	576.507	622.046	527.592	653.673	RHBDD3
ENSG00000100266	8968.2	7601.14	10890.2	8672.33	PACSIN2
ENSG00000100271	175.996	141.809	261.43	236.5	TTLL1
ENSG00000100280	2724.61	2603.02	1601.7	1958.99	AP1B1
ENSG00000100281	1669.59	1809.59	1755.49	1618.96	HMGXB4
ENSG00000100284	1126.38	885.654	1970.78	1404.79	TOM1
ENSG00000100288	71.3499	111.359	81.623	125.863	CHKB
ENSG00000100292	23076.4	24981	64630.1	58161.7	HMOX1
ENSG00000100294	571.75	505.466	503.934	523.75	MCAT
ENSG00000100296	2795.96	2500.36	3599.69	3320.13	THOC5
ENSG00000100297	2683.71	2821.39	1524.81	2202.59	MCM5
ENSG00000100299	288.253	418.467	240.137	410.068	ARSA
ENSG00000100300	3693.07	2615.2	4188.8	3466.29	TSPO
ENSG00000100302	66.5932	99.1793	201.1	198.944	RASD2
ENSG00000100304	2177.6	2395.09	2920.69	2874.54	TTLL12
ENSG00000100307	75.1552	80.9094	101.733	95.4119	CBX7
ENSG00000100311	1474.56	1965.32	720.412	1030.25	PDGFB
ENSG00000100314	14.27	13.9199	10.6465	9.13518	CABP7
ENSG00000100316	59011.1	42025.9	68244	49074.2	RPL3
ENSG00000100319	497.546	334.948	419.945	293.341	ZMAT5
ENSG00000100320	3579.86	3915.84	3844.56	3425.69	RBFOX2
ENSG00000100321	390.046	344.518	527.592	454.729	SYNGR1
ENSG00000100324	815.291	769.945	947.537	882.053	TAB1
ENSG00000100325	1386.09	1271.93	1367.48	1382.46	ASCC2
ENSG00000100330	196.926	227.068	231.857	225.335	MTMR3
ENSG00000100335	2135.74	2228.92	2359.97	2488.83	MIEF1
ENSG00000100342	752.503	916.974	1120.25	1177.42	APOL1
ENSG00000100345	72498.1	88601.1	91176.5	97344.5	MYH9
ENSG00000100347	2615.21	1851.35	2202.64	1809.78	SAMM50
ENSG00000100348	3178.4	2454.25	2897.03	2252.33	TXN2
ENSG00000100350	586.02	788.215	683.741	848.557	FOXRED2
ENSG00000100353	8923.49	7315.78	11615.3	9321.95	EIF3D
ENSG00000100354	1212.95	1445.93	1386.41	1341.86	TNRC6B
ENSG00000100359	1416.53	1476.38	1333.18	1499.18	SGSM3
ENSG00000100360	435.71	382.797	285.089	323.791	IFT27
ENSG00000100364	5192.37	5221.7	6381.98	7029.02	KIAA0930
ENSG00000100372	781.995	634.226	671.911	491.27	SLC25A17
ENSG00000100376	203.585	218.368	302.833	291.311	FAM118A
ENSG00000100379	464.25	516.776	429.408	495.33	KCTD17
ENSG00000100380	15499.1	12142.5	14030.9	10409	ST13
ENSG00000100387	2109.1	1535.54	1518.9	1290.09	RBX1
ENSG00000100393	3163.18	4286.46	3378.48	4032.68	EP300
ENSG00000100395	723.012	731.665	447.152	551.156	L3MBTL2
ENSG00000100401	4698.63	5238.23	3230.62	4362.56	RANGAP1
ENSG00000100403	5514.87	6157.82	6055.48	6455.53	ZC3H7B
ENSG00000100410	1036	822.144	583.191	598.862	PHF5A
ENSG00000100412	6965.65	5793.29	7299.94	5822.16	ACO2
ENSG00000100413	1261.47	1264.1	719.229	849.572	POLR3H
ENSG00000100416	1417.48	1604.27	1353.29	1704.22	TRMU
ENSG00000100417	1528.79	1018.76	2141.13	1416.97	PMM1
ENSG00000100418	2003.5	1974.89	2180.16	2079.78	DESI1
ENSG00000100422	1359.45	1347.62	994.855	1097.24	CERK
ENSG00000100425	1118.77	1398.08	958.183	1419	BRD1
ENSG00000100426	1298.57	1651.25	1337.91	1699.14	ZBED4
ENSG00000100429	193.12	287.098	218.844	420.218	HDAC10
ENSG00000100439	484.228	409.767	811.499	585.667	ABHD4
ENSG00000100441	807.68	926.544	1204.24	1212.95	KHNYN
ENSG00000100442	1997.8	1572.95	1412.43	1136.82	FKBP3
ENSG00000100445	265.421	251.428	208.198	214.169	SDR39U1
ENSG00000100461	1137.79	1013.54	941.622	945.999	RBM23
ENSG00000100462	1424.14	1157.96	1906.9	1365.2	PRMT5
ENSG00000100473	91.3278	100.049	98.1842	112.667	COCH
ENSG00000100478	78.0092	65.2495	80.4401	47.706	AP4S1
ENSG00000100479	108.452	104.399	35.4883	66.9913	POLE2
ENSG00000100483	73.2525	75.6895	37.8542	86.2767	VCPKMT
ENSG00000100485	716.353	674.245	593.837	586.682	SOS 2
ENSG00000100490	17.124	19.1399	22.4759	31.4656	CDKL1
ENSG00000100503	1804.68	2277.64	1432.54	1685.95	NIN
ENSG00000100504	193.12	180.959	351.334	367.437	PYGL
ENSG00000100505	494.692	531.566	721.595	649.613	TRIM9
ENSG00000100519	1719.06	1323.26	1481.04	1175.39	PSMC6
ENSG00000100522	1002.7	984.833	1011.42	818.106	GNPNAT1
ENSG00000100523	236.882	362.787	279.174	380.633	DDHD1
ENSG00000100526	469.958	310.588	390.371	271.01	CDKN3
ENSG00000100528	1844.63	1612.1	2053.59	1439.3	CNIH1
ENSG00000100532	131.284	100.919	110.014	74.0965	CGRRF1
ENSG00000100554	1341.38	977.003	1177.03	822.166	ATP6V1D
ENSG00000100557	530.843	421.947	209.381	191.839	CCDC198
ENSG00000100564	136.992	118.319	94.6354	85.2617	PIGH
ENSG00000100567	2006.36	1541.63	1233.81	1166.26	PSMA3
ENSG00000100568	1268.12	1090.1	1016.15	957.164	VTI1B
ENSG00000100575	650.711	459.357	967.647	581.607	TIMM9
ENSG00000100577	268.275	198.359	256.699	225.335	GSTZ1
ENSG00000100578	255.908	246.208	253.15	229.395	KIAA0586
ENSG00000100580	507.06	584.636	493.287	550.141	TMED8
ENSG00000100583	17.124	25.2298	9.46354	7.10514	SAMD15
ENSG00000100591	2379.28	2129.75	1488.14	1552.98	AHSA1
ENSG00000100592	679.251	612.476	980.659	724.724	DAAM1
ENSG00000100596	2855.9	3044.11	2280.71	2123.42	SPTLC2
ENSG00000100599	215.952	261.868	350.151	351.197	RIN3
ENSG00000100600	566.994	467.187	629.325	534.916	LGMN
ENSG00000100601	183.607	143.549	196.368	155.298	ALKBH1
ENSG00000100603	1855.1	1501.61	1743.66	1407.83	SNW1
ENSG00000100605	421.44	391.497	348.968	376.573	ITPK1
ENSG00000100612	1386.09	1121.42	1644.29	1276.9	DHRS7
ENSG00000100614	1053.12	1065.74	1175.84	1105.36	PPM1A
ENSG00000100625	58.0312	54.8096	23.6589	47.706	SIX4
ENSG00000100626	15.2213	13.9199	11.8294	11.1652	GALNT16
ENSG00000100629	179.802	201.839	131.307	168.493	CEP128
ENSG00000100632	3377.23	2553.43	2084.34	1818.92	ERH
ENSG00000100644	3848.14	3460.84	3522.8	3421.63	HIF1A
ENSG00000100647	117.965	145.289	162.063	174.583	SUSD6
ENSG00000100650	4401.81	3709.65	3904.89	3314.04	SRSF5
ENSG00000100652	8.56198	12.1799	3.54883	16.2403	SLC10A1
ENSG00000100664	6122.77	5293.91	5957.3	5092.36	EIF5
ENSG00000100697	752.503	1177.97	751.169	995.735	DICER1
ENSG00000100711	745.844	622.046	555.983	529.841	ZFYVE21
ENSG00000100714	3857.65	3513.91	3029.52	2666.46	MTHFD1
ENSG00000100722	1366.11	1260.62	1133.26	1189.6	ZC3H14
ENSG00000100726	999.849	1270.19	699.119	1223.1	TELO2
ENSG00000100731	928.5	1153.61	1012.6	1093.18	PCNX1
ENSG00000100744	635.489	490.677	418.762	334.957	GSKIP
ENSG00000100749	453.785	347.128	218.844	213.154	VRK1
ENSG00000100764	1494.54	1311.08	1330.81	1089.12	PSMC1
ENSG00000100767	782.946	1112.72	462.531	706.454	PAPLN
ENSG00000100784	248.298	287.968	318.212	326.837	RPS6KA5
ENSG00000100796	1692.42	2015.78	2047.67	1949.85	PPP4R3A
ENSG00000100802	197.877	152.249	356.066	233.455	C14orf93
ENSG00000100804	2173.79	1680.83	1992.08	1581.4	PSMB5
ENSG00000100811	2849.24	2946.67	3283.85	2910.06	YY1
ENSG00000100813	5296.06	5314.79	4838.24	5262.88	ACIN1
ENSG00000100814	872.371	619.436	1755.49	1099.27	CCNB1IP1
ENSG00000100815	1017.92	1139.69	1180.58	1062.73	TRIP11
ENSG00000100823	4680.55	3459.1	5300.77	3805.31	APEX1
ENSG00000100836	2666.58	2758.75	2537.41	2772.02	PABPN1
ENSG00000100852	1857	1935.74	2255.87	1979.29	ARHGAP5
ENSG00000100865	395.754	309.718	449.518	324.806	CINP
ENSG00000100867	39.9559	24.3598	5.91471	8.12016	DHRS2
ENSG00000100883	1856.05	1496.39	1414.8	1262.69	SRP54
ENSG00000100888	1702.88	2118.44	1576.86	1850.38	CHD8
ENSG00000100889	641.197	601.166	2268.88	1909.25	PCK2
ENSG00000100890	105.598	135.719	113.562	114.697	KIAA0391
ENSG00000100897	862.858	742.975	943.988	772.43	DCAF11
ENSG00000100902	1471.71	921.324	1406.52	986.6	PSMA6
ENSG00000100906	837.172	705.565	875.378	760.25	NFKBIA
ENSG00000100908	341.528	294.928	307.565	278.116	EMC9
ENSG00000100911	984.628	828.234	683.741	649.613	PSME2
ENSG00000100916	177.899	176.609	134.855	129.923	BRMS1L
ENSG00000100918	17.124	47.8497	24.8418	54.8111	REC8
ENSG00000100926	224.514	231.418	199.917	205.034	TM9SF1
ENSG00000100934	1986.38	1821.77	1763.77	1579.37	SEC23A
ENSG00000100938	1016.97	759.505	1141.54	745.025	GMPR2
ENSG00000100941	5204.73	5629.73	5025.14	4835.56	PNN
ENSG00000100949	290.156	239.248	378.542	369.467	RABGGTA
ENSG00000100979	17.124	13.0499	17.7441	19.2854	PLTP
ENSG00000100982	1051.22	970.913	1031.53	1088.1	PCIF1
ENSG00000100983	1587.77	1342.4	1647.84	1636.21	GSS
ENSG00000100991	3028.09	2763.1	2491.28	2698.94	TRPC4AP
ENSG00000100994	5278.94	5105.12	9875.2	9834.53	PYGB
ENSG00000100997	2915.83	2268.07	2532.68	2153.87	ABHD12
ENSG00000101000	138.894	94.8293	210.564	128.908	PROCR
ENSG00000101003	853.344	829.974	408.115	491.27	GINS1
ENSG00000101004	1903.61	2226.31	2139.94	2747.66	NINL
ENSG00000101019	1907.42	1907.9	2130.48	2113.27	UQCC1
ENSG00000101040	2642.8	2816.17	2688.83	2474.62	ZMYND8
ENSG00000101049	604.096	535.046	291.004	350.182	SGK2
ENSG00000101052	1251	872.604	954.635	667.883	IFT52
ENSG00000101057	2742.69	2593.45	1161.65	1580.39	MYBL2
ENSG00000101079	1963.55	1606.88	1921.1	1416.97	NDRG3
ENSG00000101084	2710.34	2160.19	2034.66	1898.09	C20orf24
ENSG00000101096	130.332	148.769	223.576	215.184	NFATC2
ENSG00000101104	583.166	1231.04	1255.1	3079.57	PABPC1L
ENSG00000101109	1365.16	1607.75	1472.76	1598.66	STK4
ENSG00000101126	3847.18	4522.23	4295.26	4395.04	ADNP
ENSG00000101132	1329.96	764.725	1324.9	820.136	PFDN4
ENSG00000101134	55.1772	37.4097	34.3053	25.3755	DOK5
ENSG00000101138	1525.94	1236.26	1337.91	1032.28	CSTF1
ENSG00000101146	1229.12	1071.83	935.708	1003.86	RAE1
ENSG00000101150	4124.02	3791.43	3728.64	3952.49	TPD52L2
ENSG00000101152	2729.37	2891.86	2388.36	2573.08	DNAJC5
ENSG00000101158	3068.04	2817.91	2640.33	2679.65	NELFCD
ENSG00000101160	4146.85	4048.08	4008.99	4430.56	CTSZ
ENSG00000101161	4241.99	3957.6	4346.13	4343.27	PRPF6
ENSG00000101162	14.27	18.2699	10.6465	20.3004	TUBB1
ENSG00000101166	4351.39	3546.1	4045.66	3192.24	PRELID3B
ENSG00000101181	767.725	774.295	555.983	676.004	MTG2
ENSG00000101182	7639.19	5843.75	5972.68	5255.77	PSMA7
ENSG00000101187	1220.56	2040.14	4521.21	5635.39	SLCO4A1
ENSG00000101188	10.4646	13.9199	11.8294	13.1953	NTSR1
ENSG00000101189	1267.17	1161.44	1631.28	1426.1	MRGBP
ENSG00000101190	619.317	558.536	652.984	587.697	TCFL5
ENSG00000101191	3614.11	4739.73	3041.35	3971.77	DIDO1
ENSG00000101193	1631.53	1621.67	1727.1	1473.81	GID8
ENSG00000101197	82.7658	76.5595	112.38	89.3218	BIRC7
ENSG00000101198	75.1552	67.8595	69.7936	77.1415	NKAIN4
ENSG00000101199	2225.16	2722.21	2556.34	3509.94	ARFGAP1
ENSG00000101210	6646.95	5694.98	9157.16	8205.42	EEF1A2
ENSG00000101213	58.9826	97.4393	82.806	144.133	PTK6
ENSG00000101216	689.715	699.475	632.874	615.102	GMEB2
ENSG00000101220	1083.57	965.693	1159.28	1136.82	C20orf27
ENSG00000101224	3197.43	3189.4	4451.41	3985.98	CDC25B
ENSG00000101230	14.27	39.1497	16.5612	25.3755	ISM1
ENSG00000101236	412.878	521.996	599.752	661.793	RNF24
ENSG00000101246	728.72	845.634	773.644	1066.79	ARFRP1
ENSG00000101247	1006.51	854.334	710.948	703.409	NDUFAF5
ENSG00000101255	4075.5	4181.19	12348.7	11194.7	TRIB3
ENSG00000101265	471.86	500.247	572.544	567.396	RASSF2
ENSG00000101266	6388.19	5783.72	7402.85	5969.33	CSNK2A1
ENSG00000101290	3125.12	2936.23	3320.52	2867.43	CDS2
ENSG00000101294	6124.67	6108.23	6346.49	6327.64	HM13
ENSG00000101298	30.4426	24.3598	7.09766	16.2403	SNPH
ENSG00000101307	73.2525	89.6094	62.696	85.2617	SIRPB1
ENSG00000101310	3935.66	3114.58	4391.08	3559.68	SEC23B
ENSG00000101311	43.7613	53.9396	81.623	116.727	FERMT1
[truncated: 14,069 more rows]

## Sheet: Table S6 MSTO-pyrimethamine
ID	MSTO-Pyr0-A	MSTO-Pyr0-B	MSTO-Pyr10-A	MSTO-Pyr10-B	Gene.name
ENSG00000000003	793.287	944.576	838.956	998.213	TSPAN6
ENSG00000000419	1142.63	1381.47	818.753	957.644	DPM1
ENSG00000000457	117.659	109.402	124.408	100.355	SCYL3
ENSG00000000460	245.022	285.303	119.091	183.629	C1orf112
ENSG00000000971	629.535	526.989	471.049	415.299	CFH
ENSG00000001036	3431.51	3297.79	3227.16	4024.88	FUCA2
ENSG00000001084	815.121	767.96	710.295	724.906	GCLC
ENSG00000001167	530.071	639.251	430.643	504.979	NFYA
ENSG00000001460	168.604	178.046	148.864	237.009	STPG1
ENSG00000001461	815.121	935.995	993.137	1394.3	NIPAL3
ENSG00000001497	1762.46	2190.9	1173.9	1438.07	LAS1L
ENSG00000001561	264.429	266.712	267.956	368.325	ENPP4
ENSG00000001617	127.363	100.822	288.159	220.995	SEMA3F
ENSG00000001629	1206.91	1171.96	1335.52	1053.73	ANKIB1
ENSG00000001630	93.3993	64.3542	86.1286	67.2593	CYP51A1
ENSG00000001631	656.221	718.621	783.664	744.123	KRIT1
ENSG00000002016	282.624	193.062	451.909	387.542	RAD52
ENSG00000002330	583.442	583.478	491.252	661.917	BAD
ENSG00000002549	1397.35	1585.97	1400.39	1536.29	LAP3
ENSG00000002586	3136.76	3372.16	3296.28	3797.48	CD99
ENSG00000002822	688.971	643.542	1191.98	1012.09	MAD1L1
ENSG00000002834	12074	13939.8	11279.7	11407.4	LASP1
ENSG00000002919	308.096	352.518	276.462	247.685	SNX11
ENSG00000003056	2194.28	2363.23	2405.22	2405.32	M6PR
ENSG00000003096	241.383	313.905	139.294	137.721	KLHL13
ENSG00000003137	48.5191	15.016	43.596	1.06761	CYP26B1
ENSG00000003147	87.3344	50.7683	114.838	72.5973	ICA1
ENSG00000003249	206.206	243.831	187.144	211.386	DBNDD1
ENSG00000003393	920.65	965.312	790.044	784.692	ALS2
ENSG00000003400	154.048	126.563	188.207	195.372	CASP10
ENSG00000003402	793.287	827.308	1131.37	1127.39	CFLAR
ENSG00000003436	4599.61	3244.16	8105.66	7288.56	TFPI
ENSG00000003509	390.579	386.84	429.58	464.409	NDUFAF7
ENSG00000003756	901.242	684.299	1405.7	1196.79	RBM5
ENSG00000003987	18.1947	19.3062	7.44321	12.8113	MTMR7
ENSG00000003989	462.145	413.297	338.134	364.054	SLC7A2
ENSG00000004059	1901.95	1650.33	1800.19	2073.29	ARF5
ENSG00000004139	291.115	230.96	399.807	307.471	SARM1
ENSG00000004142	3150.1	3264.19	2369.07	2606.03	POLDIP2
ENSG00000004399	849.084	626.38	833.64	772.948	PLXND1
ENSG00000004455	4347.31	5534.46	2693.38	3043.75	AK2
ENSG00000004478	6864.24	8880.87	3402.61	3840.19	FKBP4
ENSG00000004487	3268.98	3493.72	2203.19	2246.25	KDM1A
ENSG00000004534	1040.73	1025.38	988.884	974.726	RBM6
ENSG00000004660	633.174	471.215	934.655	662.984	CAMKK1
ENSG00000004700	1079.55	1420.8	961.238	1566.18	RECQL
ENSG00000004766	445.163	522.699	376.414	418.502	VPS50
ENSG00000004777	84.9084	90.0958	84.002	82.2058	ARHGAP33
ENSG00000004779	1461.64	1670.35	1029.29	1355.86	NDUFAB1
ENSG00000004838	3.63893	7.15046	10.6332	19.2169	ZMYND10
ENSG00000004864	750.833	799.422	536.975	532.736	SLC25A13
ENSG00000004866	348.125	354.663	304.108	243.415	ST7
ENSG00000004897	2092.39	2731.48	1891.64	2015.64	CDC27
ENSG00000004961	909.733	1083.29	536.975	614.942	HCCS
ENSG00000004975	914.585	808.717	1034.61	1205.33	DVL2
ENSG00000005007	2695.24	2381.82	2026.68	1929.17	UPF1
ENSG00000005020	907.307	928.845	823.007	539.142	SKAP2
ENSG00000005022	9512.17	10590.5	10387.5	12785.7	SLC25A5
ENSG00000005059	505.812	547.01	347.704	558.359	MCUB
ENSG00000005073	115.233	84.3754	59.5457	64.0565	HOXA11
ENSG00000005075	1021.33	1033.96	629.483	945.901	POLR2J
ENSG00000005100	1895.88	1901.31	1416.34	1363.34	DHX33
ENSG00000005156	788.436	728.632	675.206	743.055	LIG3
ENSG00000005175	1015.26	1448.68	778.347	939.495	RPAP3
ENSG00000005187	35.1764	35.0373	29.7728	35.2311	ACSM3
ENSG00000005189	73.9916	107.972	115.901	171.885	REXO5
ENSG00000005194	2113.01	2316.75	1633.25	1650.52	CIAPIN1
ENSG00000005206	493.682	225.955	555.051	409.961	SPPL2B
ENSG00000005238	164.965	200.928	271.146	340.567	FAM214B
ENSG00000005243	10.9168	8.58055	18.0764	12.8113	COPZ2
ENSG00000005249	433.033	501.247	359.401	382.204	PRKAR2B
ENSG00000005302	681.694	625.665	775.157	715.297	MSL3
ENSG00000005339	1232.39	1184.83	1337.65	1118.85	CREBBP
ENSG00000005436	807.843	882.367	717.738	901.061	GCFC2
ENSG00000005448	476.7	411.867	560.368	784.692	WDR54
ENSG00000005469	246.234	282.443	256.259	325.62	CROT
ENSG00000005483	773.88	757.234	997.39	886.115	KMT2E
ENSG00000005486	684.119	740.788	677.332	633.091	RHBDD2
ENSG00000005513	9.70382	15.731	18.0764	12.8113	SOX8
ENSG00000005700	1088.04	1001.78	1224.94	1171.17	IBTK
ENSG00000005801	345.699	282.443	397.68	418.502	ZNF195
ENSG00000005810	879.409	1002.49	732.625	630.956	MYCBP2
ENSG00000005812	538.562	626.38	685.839	744.123	FBXL3
ENSG00000005882	116.446	141.579	114.838	143.059	PDK2
ENSG00000005884	16303.6	10341	23360	14881.4	ITGA3
ENSG00000005889	475.487	466.21	428.516	407.826	ZFX
ENSG00000005893	1721.22	1866.99	1956.5	1889.67	LAMP2
ENSG00000006007	636.813	782.26	491.252	583.982	GDE1
ENSG00000006015	483.978	480.511	444.466	599.996	REX1BD
ENSG00000006016	48.5191	32.8921	37.2161	33.0958	CRLF1
ENSG00000006025	234.105	179.477	426.39	352.311	OSBPL7
ENSG00000006042	858.788	879.507	644.37	771.88	TMEM98
ENSG00000006062	1105.02	926.7	756.018	550.886	MAP3K14
ENSG00000006118	619.832	529.849	531.658	407.826	TMEM132A
ENSG00000006125	6420.29	7387.14	6430.94	6676.82	AP2B1
ENSG00000006194	652.582	585.623	585.887	510.317	ZNF263
ENSG00000006210	2.42596	28.6018	5.31658	0	CX3CL1
ENSG00000006282	1403.42	966.027	2347.8	1833.08	SPATA20
ENSG00000006327	3532.19	4233.79	3179.31	3414.21	TNFRSF12A
ENSG00000006432	64.2878	55.0586	39.3427	44.8395	MAP3K9
ENSG00000006451	971.595	1189.84	1095.22	1132.73	RALA
ENSG00000006453	513.09	545.58	573.127	625.618	BAIAP2L1
ENSG00000006459	106.742	70.7896	181.827	108.896	KDM7A
ENSG00000006468	357.828	559.881	334.945	553.021	ETV1
ENSG00000006530	1299.1	1348.58	1044.18	1074.01	AGK
ENSG00000006534	533.71	357.523	1364.23	1126.33	ALDH3B1
ENSG00000006576	1500.45	1821.94	1176.03	1116.72	PHTF2
ENSG00000006607	978.873	1025.38	857.033	787.895	FARP2
ENSG00000006625	930.354	1104.03	934.655	1307.82	GGCT
ENSG00000006634	847.871	1056.84	544.418	604.266	DBF4
ENSG00000006638	19.4076	31.462	11.6965	27.7578	TBXA2R
ENSG00000006652	1804.91	2022.87	1734.27	1935.57	IFRD1
ENSG00000006695	507.025	572.752	396.617	352.311	COX10
ENSG00000006704	1050.44	896.668	1690.67	1299.28	GTF2IRD1
ENSG00000006712	767.815	1036.82	835.766	940.563	PAF1
ENSG00000006715	1114.73	1018.23	1031.42	635.227	VPS41
ENSG00000006744	2986.35	3150.49	2525.38	2812.08	ELAC2
ENSG00000006757	430.607	328.206	321.121	279.713	PNPLA4
ENSG00000006788	111.594	63.6391	178.637	116.369	MYH13
ENSG00000006831	2082.68	2113.68	1353.6	1246.97	ADIPOR2
ENSG00000006837	9.70382	12.1558	10.6332	12.8113	CDKL3
ENSG00000007047	561.609	765.814	1078.2	1195.72	MARK4
ENSG00000007062	16.9817	15.016	34.0261	29.893	PROM1
ENSG00000007080	1506.52	1430.81	1177.09	1193.59	CCDC124
ENSG00000007168	2678.25	3089.71	2175.54	1826.68	PAFAH1B1
ENSG00000007202	3726.27	3809.05	3750.32	3547.66	KIAA0100
ENSG00000007255	81.2695	59.3488	115.901	97.1523	TRAPPC6A
ENSG00000007264	579.803	428.313	766.651	546.615	MATK
ENSG00000007341	355.402	303.18	395.554	417.435	ST7L
ENSG00000007372	18.1947	21.4514	11.6965	18.1493	PAX6
ENSG00000007376	1153.54	1280.65	1069.7	1218.14	RPUSD1
ENSG00000007384	519.154	332.496	661.383	446.26	RHBDF1
ENSG00000007392	801.778	719.336	951.668	881.844	LUC7L
ENSG00000007516	13.3428	7.15046	26.5829	19.2169	BAIAP3
ENSG00000007520	1564.74	1401.49	1394.01	1643.05	TSR3
ENSG00000007541	659.86	486.231	566.747	612.807	PIGQ
ENSG00000007545	428.181	241.686	422.136	287.187	CRAMP1
ENSG00000007866	351.764	391.845	410.44	377.933	TEAD3
ENSG00000007923	1088.04	1161.95	642.243	648.038	DNAJC11
ENSG00000007944	132.215	82.2303	132.915	84.341	MYLIP
ENSG00000007968	114.02	125.848	31.8995	30.9606	E2F2
ENSG00000008018	2981.5	3364.29	2489.22	3020.26	PSMB1
ENSG00000008083	409.986	311.76	363.654	244.482	JARID2
ENSG00000008086	109.168	107.972	133.978	111.031	CDKL5
ENSG00000008128	173.456	131.568	203.093	161.209	CDK11A
ENSG00000008130	1200.85	1247.04	1114.36	1269.39	NADK
ENSG00000008256	1331.85	1107.61	1553.5	1217.07	CYTH3
ENSG00000008277	275.346	207.363	212.663	177.223	ADAM22
ENSG00000008282	1590.21	1676.07	2235.09	2419.2	SYPL1
ENSG00000008283	110.381	131.568	138.231	119.572	CYB561
ENSG00000008294	2456.28	2346.07	3987.44	2699.98	SPAG9
ENSG00000008300	47.3061	36.4674	129.725	89.6791	CELSR3
ENSG00000008311	1044.37	629.241	803.867	582.914	AASS
ENSG00000008324	286.263	348.943	179.7	224.198	SS18L2
ENSG00000008382	190.438	186.627	207.347	196.44	MPND
ENSG00000008394	2.42596	45.763	4.25326	1.06761	MGST1
ENSG00000008405	1011.62	1030.38	610.343	583.982	CRY1
ENSG00000008441	1858.28	2141.56	1759.79	1885.4	NFIX
ENSG00000008513	134.641	155.165	116.965	108.896	ST3GAL1
ENSG00000008516	55.797	40.7576	74.4321	41.6367	MMP25
ENSG00000008517	3817.24	3262.76	2563.65	2335.93	IL32
ENSG00000008710	2145.76	1185.55	1932.05	1366.54	PKD1
ENSG00000008838	1261.5	1339.28	1199.42	1238.43	MED24
ENSG00000008853	172.243	220.234	231.803	259.429	RHOBTB2
ENSG00000008869	670.777	526.989	925.085	801.774	HEATR5B
ENSG00000008952	1772.16	2247.39	1879.94	2116	SEC62
ENSG00000008988	13068.6	13392.8	12230.3	14997.8	RPS20
ENSG00000009307	13540.5	16220.8	14010.3	15778.2	CSDE1
ENSG00000009335	3221.67	3579.52	2417.98	2527.03	UBE3C
ENSG00000009413	961.891	821.588	1154.76	841.275	REV3L
ENSG00000009724	30.3244	14.3009	25.5196	8.54086	MASP2
ENSG00000009780	78.8436	100.106	140.358	150.533	FAM76A
ENSG00000009830	408.774	318.196	444.466	437.719	POMT2
ENSG00000009844	1979.58	2645.67	1680.04	2127.74	VTA1
[truncated: 14,339 more rows]

## Sheet: Table S7 MSTO-atovaquone
ID	MSTO-AQ0-A	MSTO-AQ0-B	MSTO-AQ30-A	MSTO-AQ30-B	Gene.name
[truncated: 14,011 more rows]

[truncated: 1 more sheets: Table S9 primers]
